# Supplementary material
Source: MDPI journal article supplement (https://www.mdpi.com/2304-6740/6/3/93)
Supplement: s1 [file s1]

## Supplementary Materials

### One-Dimensional Fluorene-Based Co(II) Phosphonate $\text{Co}(\text{H}_2\text{O})_2\text{PO}_3\text{C}-\text{C}_{12}\text{H}_9\cdot\text{H}_2\text{O}$ : Structure and Magnetism

Clarisse Bloyet <sup>1</sup>, Jean-Michel Rueff <sup>1\*</sup>, Olivier Perez <sup>1</sup>, Alain Pautrat <sup>1</sup>, Vincent Caignaert <sup>1</sup>, Bernard Raveau <sup>1\*</sup>, Guillaume Rogez <sup>2</sup> and Paul-Alain Jaffrès<sup>3</sup>

#### Summary

**Figure S1:** X-ray diffraction data recorded on powder from  $\text{Co}(\text{H}_2\text{O})_2\text{PO}_3\text{C}-\text{C}_{12}\text{H}_9\cdot\text{H}_2\text{O}$ . The vertical dashes correspond to the calculated position of the peaks, the bottom line to the difference between experimental and calculated pattern.

**Figure S2:** (a) Hirshfeld Surface represented on the fluorene moiety of  $\text{Co}(\text{H}_2\text{O})_2\text{PO}_3\text{C}-\text{C}_{12}\text{H}_9\cdot\text{H}_2\text{O}$  with a shape index mapping. (b) Representation of the corresponding two-dimensional fingerprint plot showing the contribution of each contact-type in percentage. “di” and “de” data points represent the distance from the surface to the nearest atom in the molecule itself or to another molecule, respectively.

**Figure S3:** Representation of the AC susceptibility of  $\text{Co}(\text{H}_2\text{O})_2\text{PO}_3\text{C}-\text{C}_{12}\text{H}_9\cdot\text{H}_2\text{O}$  showing (a) no changes in the real part of the susceptibility ( $m'$ ) and (b) no losses ( $m''$ ) in the temperature range from 2K to 6 K, under 0.05 T with wave frequencies varying from 0.1 Hz to 1KHz.

**Figure S4:** X-ray diffraction data recorded on the TGA residu of  $\text{Co}(\text{H}_2\text{O})_2\text{PO}_3\text{C}-\text{C}_{12}\text{H}_9\cdot\text{H}_2\text{O}$ . The latter is compatible with the cobalt pyrophosphate  $\text{Co}_2\text{P}_2\text{O}_7$  which crystallizes in the monoclinic  $\text{P}2_1/\text{c}$  space group. [Ref code: 00-049-1091 from Lazoryak,B., X-ray Powder Diffraction Laboratory of Chemistry Technology, Moscow State Univ., Russia, ICDD Grant-in-Aid (1997)]

**Table S1:** Atomic coordinates of  $\text{Co}(\text{H}_2\text{O})_2\text{PO}_3\text{C}-\text{C}_{12}\text{H}_9\cdot\text{H}_2\text{O}$ .

**Table S2:** Thermal parameters of  $\text{Co}(\text{H}_2\text{O})_2\text{PO}_3\text{C}-\text{C}_{12}\text{H}_9\cdot\text{H}_2\text{O}$ .

**Table S3:** Bond angles for  $\text{Co}(\text{H}_2\text{O})_2\text{PO}_3\text{C}-\text{C}_{12}\text{H}_9\cdot\text{H}_2\text{O}$

**Table S4:** Interatomic distances (Å) for  $\text{Co}(\text{H}_2\text{O})_2\text{PO}_3\text{C}-\text{C}_{12}\text{H}_9\cdot\text{H}_2\text{O}$ .

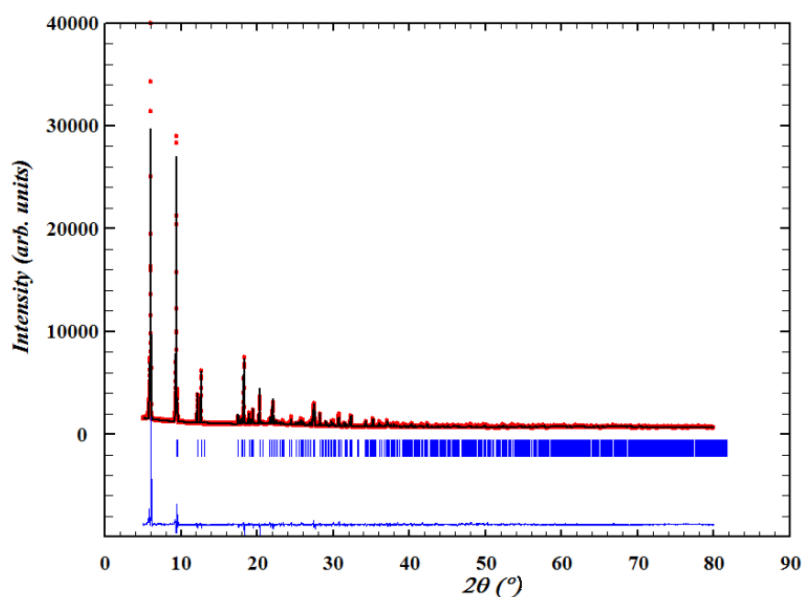

**Figure S1:** X-ray diffraction data recorded on powder from  $\text{Co}(\text{H}_2\text{O})_2\text{PO}_3\text{C-C}_{12}\text{H}_9\cdot\text{H}_2\text{O}$ . The vertical dashes correspond to the calculated position of the peaks, the bottom line to the difference between experimental and calculated pattern.

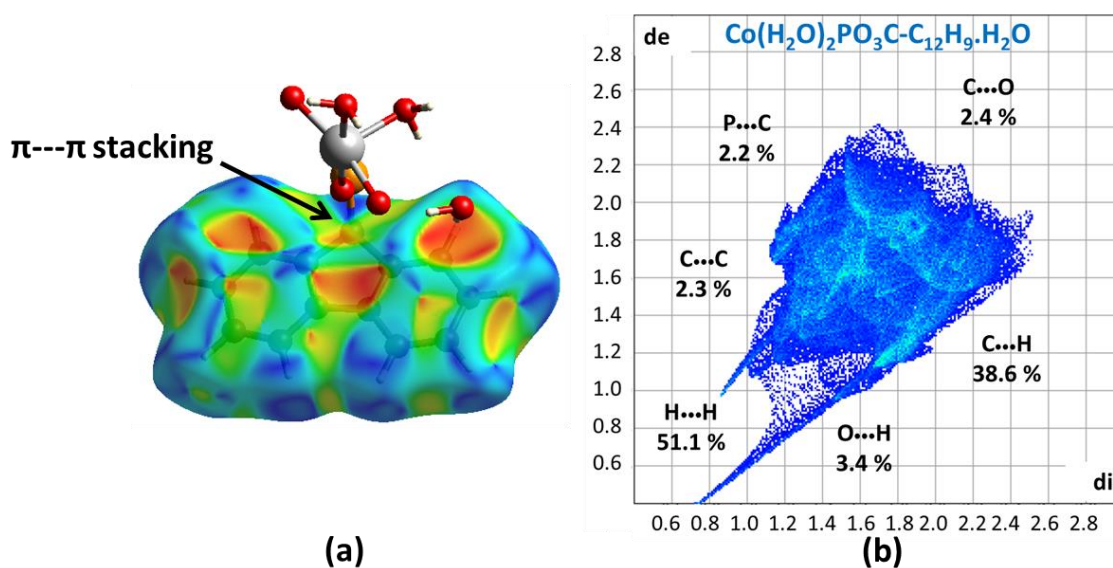

**Figure S2:** (a) Hirshfeld Surface represented on the fluorene moiety of  $\text{Co}(\text{H}_2\text{O})_2\text{PO}_3\text{C-C}_{12}\text{H}_9\cdot\text{H}_2\text{O}$  with shape index mapping. (b) Representation of the corresponding two-dimensional fingerprint plot showing the contribution of each contact-type in percentage. "di" and "de" data points represent the distance from the surface to the nearest atom in the molecule itself or to another molecule, respectively.

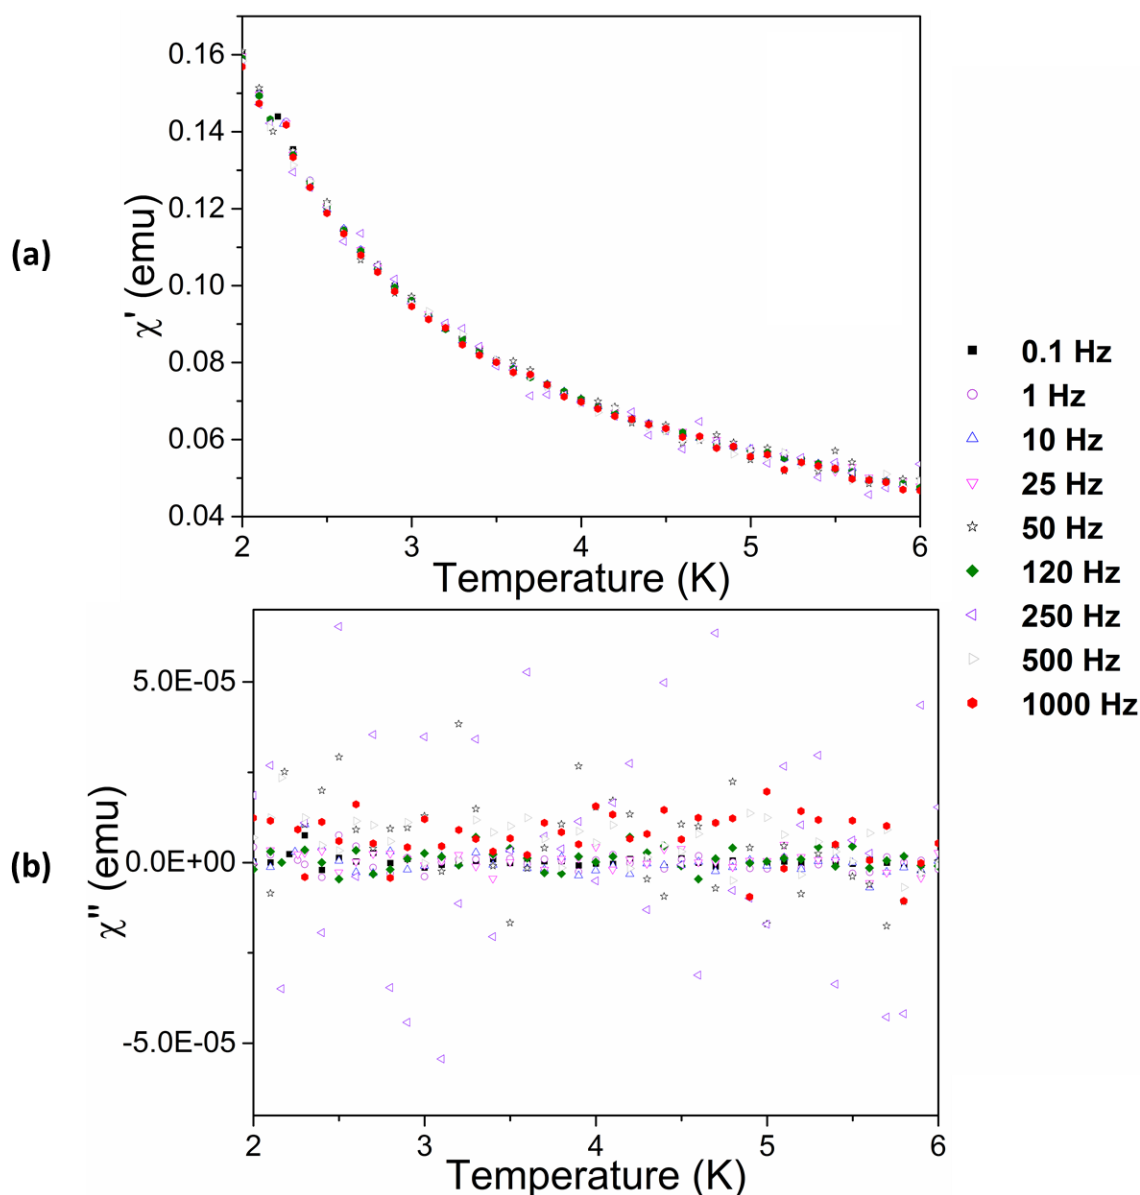

**Figure S3:** Representation of the AC susceptibility of  $\text{Co}(\text{H}_2\text{O})_2\text{PO}_3\text{C-C}_{12}\text{H}_9\cdot\text{H}_2\text{O}$  showing (a) no changes in the real part of the susceptibility ( $\chi'$ ) and (b) no losses ( $\chi''$ ) in the temperature range from 2 K to 6 K, under 0.05 T with wave frequencies varying from 0.1 Hz to 1 KHz.

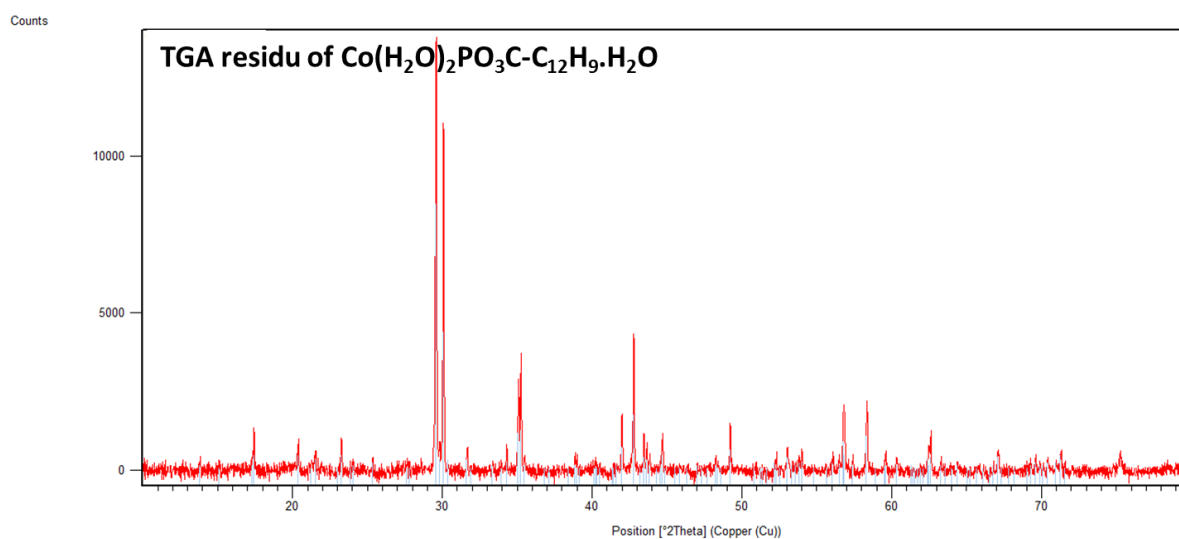

**Figure S4:** X-ray diffraction data recorded on the TGA residue of  $\text{Co}(\text{H}_2\text{O})_2\text{PO}_3\text{C}-\text{C}_{12}\text{H}_9\cdot\text{H}_2\text{O}$ . The latter is compatible with the cobalt pyrophosphate  $\text{Co}_2\text{P}_2\text{O}_7$  which crystallizes in the monoclinic  $\text{P}2_1/\text{c}$  space group. [Ref code: 00-049-1091 from Lazoryak, B., X-ray Powder Diffraction Laboratory of Chemistry Technology, Moscow State Univ., Russia, ICDD Grant-in-Aid (1997)]

**Table S1:** Atomic coordinates of  $\text{Co}(\text{H}_2\text{O})_2\text{PO}_3\text{C}-\text{C}_{12}\text{H}_9\cdot\text{H}_2\text{O}$ .

|       |    | x/a          | y/b         | z/c         |
|-------|----|--------------|-------------|-------------|
| Co1   | Co | 0.00571(3)   | 0.97164(8)  | 0.82215(2)  |
| P1    | P  | -0.11568(5)  | 0.40478(14) | 0.79390(4)  |
| O1    | O  | -0.10822(13) | 0.7178(4)   | 0.79278(13) |
| O2    | O  | 0.07398(13)  | 0.7647(4)   | 0.76087(11) |
| O3    | O  | -0.06758(14) | 1.2704(4)   | 0.86596(12) |
| C1    | C  | -0.23792(18) | 0.3165(6)   | 0.77052(17) |
| C2    | C  | -0.29261(19) | 0.4159(6)   | 0.69727(18) |
| C3    | C  | -0.2881(2)   | 0.3394(8)   | 0.63096(19) |
| C4    | C  | -0.3470(3)   | 0.4604(8)   | 0.5704(2)   |
| C5    | C  | -0.4092(2)   | 0.6644(9)   | 0.5769(2)   |
| C6    | C  | -0.4155(2)   | 0.7413(8)   | 0.6431(2)   |
| C7    | C  | -0.3573(2)   | 0.6155(7)   | 0.70355(19) |
| C8    | C  | -0.3521(2)   | 0.6426(7)   | 0.77868(20) |
| C9    | C  | -0.4042(2)   | 0.8020(8)   | 0.8119(2)   |
| C10   | C  | -0.3879(2)   | 0.7789(9)   | 0.8851(2)   |
| C11   | C  | -0.3201(3)   | 0.6019(9)   | 0.9252(2)   |
| C12   | C  | -0.2676(2)   | 0.4429(7)   | 0.8922(2)   |
| C13   | C  | -0.2838(2)   | 0.4628(6)   | 0.81881(19) |
| O4    | O  | -0.1057(2)   | 0.9248(7)   | 0.96715(16) |
| H1o4  | H  | -0.145(3)    | 0.770(6)    | 0.9495(18)  |
| H2o4  | H  | -0.107(3)    | 1.030(7)    | 0.9252(11)  |
| O5    | O  | 0.11970(15)  | 0.2480(5)   | 0.85676(14) |
| H1o5  | H  | 0.129(3)     | 0.298(7)    | 0.812(1)    |
| H2o5  | H  | 0.104(3)     | 0.419(4)    | 0.8754(18)  |
| O6    | O  | 0.06033(17)  | 0.7353(5)   | 0.91682(13) |
| H1o6  | H  | 0.083(2)     | 0.852(7)    | 0.9579(13)  |
| H2o6  | H  | 0.0038(15)   | 0.661(8)    | 0.9212(18)  |
| H1c1  | H  | -0.23803     | 0.11811     | 0.77402     |
| H1c3  | H  | -0.24430     | 0.20266     | 0.62646     |
| H1c4  | H  | -0.34509     | 0.40379     | 0.52391     |
| H1c5  | H  | -0.44798     | 0.75211     | 0.53472     |
| H1c6  | H  | -0.45919     | 0.87864     | 0.64745     |
| H1c9  | H  | -0.45057     | 0.92588     | 0.78442     |
| H1c10 | H  | -0.42382     | 0.88633     | 0.90830     |
| H1c11 | H  | -0.30933     | 0.58889     | 0.97590     |
| H1c12 | H  | -0.22083     | 0.32091     | 0.91998     |

**Table S2:** Thermal parameters of  $\text{Co}(\text{H}_2\text{O})_2\text{PO}_3\text{C}-\text{C}_{12}\text{H}_9\cdot\text{H}_2\text{O}$ .

|       |    | $U_{\text{iso}}$ | $U_{11}$    | $U_{22}$    | $U_{33}$   | $U_{12}$    | $U_{13}$    | $U_{23}$     |
|-------|----|------------------|-------------|-------------|------------|-------------|-------------|--------------|
| Co1   | Co |                  | 0.01746(19) | 0.00905(16) | 0.0169(2)  | 0.00143(12) | 0.00703(14) | -0.00046(14) |
| P1    | P  |                  | 0.0141(3)   | 0.0080(3)   | 0.0173(4)  | 0.0000(2)   | 0.0068(2)   | 0.0001(3)    |
| O1    | O  |                  | 0.0193(9)   | 0.0067(8)   | 0.0309(12) | -0.0019(7)  | 0.0098(8)   | -0.0010(8)   |
| O2    | O  |                  | 0.0174(9)   | 0.0113(8)   | 0.0208(11) | 0.0001(6)   | 0.0108(8)   | 0.0000(8)    |
| O3    | O  |                  | 0.0222(10)  | 0.0156(9)   | 0.0193(11) | 0.0033(7)   | 0.0073(8)   | 0.0024(9)    |
| C1    | C  |                  | 0.0155(11)  | 0.0149(11)  | 0.0226(15) | -0.0022(9)  | 0.0088(10)  | -0.0016(11)  |
| C2    | C  |                  | 0.0147(12)  | 0.0190(12)  | 0.0241(16) | -0.0045(9)  | 0.0053(10)  | -0.0009(12)  |
| C3    | C  |                  | 0.0254(15)  | 0.0303(16)  | 0.0277(18) | -0.0010(13) | 0.0083(13)  | -0.0034(15)  |
| C4    | C  |                  | 0.0365(19)  | 0.043(2)    | 0.0230(18) | -0.0037(16) | 0.0078(15)  | 0.0003(17)   |
| C5    | C  |                  | 0.0293(17)  | 0.043(2)    | 0.033(2)   | -0.0009(15) | -0.0007(15) | 0.0090(19)   |
| C6    | C  |                  | 0.0231(15)  | 0.0337(18)  | 0.039(2)   | 0.0036(13)  | 0.0059(14)  | 0.0058(17)   |
| C7    | C  |                  | 0.0163(12)  | 0.0244(14)  | 0.0273(17) | -0.0028(11) | 0.0069(11)  | -0.0012(13)  |
| C8    | C  |                  | 0.0164(12)  | 0.0224(14)  | 0.0302(18) | -0.0002(10) | 0.0086(11)  | -0.0005(13)  |
| C9    | C  |                  | 0.0234(15)  | 0.0327(17)  | 0.038(2)   | 0.0071(13)  | 0.0116(14)  | -0.0045(17)  |
| C10   | C  |                  | 0.0273(17)  | 0.042(2)    | 0.046(2)   | 0.0065(15)  | 0.0185(16)  | -0.009(2)    |
| C11   | C  |                  | 0.0364(19)  | 0.042(2)    | 0.031(2)   | -0.0004(16) | 0.0193(16)  | -0.0060(18)  |
| C12   | C  |                  | 0.0284(16)  | 0.0311(17)  | 0.0296(19) | 0.0017(13)  | 0.0143(14)  | -0.0001(15)  |
| C13   | C  |                  | 0.0173(12)  | 0.0184(12)  | 0.0266(17) | -0.0027(10) | 0.0101(11)  | -0.0002(12)  |
| O4    | O  |                  | 0.0512(17)  | 0.0435(17)  | 0.0273(15) | -0.0100(13) | 0.0126(13)  | 0.0021(14)   |
| H1o4  | H  | 0.0486           |             |             |            |             |             |              |
| H2o4  | H  | 0.0486           |             |             |            |             |             |              |
| O5    | O  |                  | 0.0232(10)  | 0.0222(11)  | 0.0318(14) | -0.0025(8)  | 0.0084(9)   | -0.0055(10)  |
| H1o5  | H  | 0.0308           |             |             |            |             |             |              |
| H2o5  | H  | 0.0308           |             |             |            |             |             |              |
| O6    | O  |                  | 0.0303(11)  | 0.0251(11)  | 0.0232(12) | 0.0012(9)   | 0.0073(9)   | 0.0026(10)   |
| H1o6  | H  | 0.0316           |             |             |            |             |             |              |
| H2o6  | H  | 0.0316           |             |             |            |             |             |              |
| H1c1  | H  | 0.0203           |             |             |            |             |             |              |
| H1c3  | H  | 0.0333           |             |             |            |             |             |              |
| H1c4  | H  | 0.0413           |             |             |            |             |             |              |
| H1c5  | H  | 0.0447           |             |             |            |             |             |              |
| H1c6  | H  | 0.0391           |             |             |            |             |             |              |
| H1c9  | H  | 0.0370           |             |             |            |             |             |              |
| H1c10 | H  | 0.0441           |             |             |            |             |             |              |
| H1c11 | H  | 0.0413           |             |             |            |             |             |              |
| H1c12 | H  | 0.0342           |             |             |            |             |             |              |

**Table S3:** Bond angles for  $\text{Co}(\text{H}_2\text{O})_2\text{PO}_3\text{C}-\text{C}_{12}\text{H}_9\cdot\text{H}_2\text{O}$ 

| Atom – Atom – Atom                         | Angle (°)  | Atom – Atom – Atom                    | Angle (°)  |
|--------------------------------------------|------------|---------------------------------------|------------|
| Co1 <sup>i</sup> -Co1-Co1 <sup>ii</sup>    | 81.923(18) | Co1-P1-C13                            | 113.20(7)  |
| Co1 <sup>i</sup> -Co1-P1                   | 54.738(19) | Co1-P1-H1c1                           | 160.27     |
| Co1 <sup>i</sup> -Co1-P1 <sup>iii</sup>    | 118.00(2)  | Co1 <sup>i</sup> -P1-O1               | 80.37(10)  |
| Co1 <sup>i</sup> -Co1-P1 <sup>ii</sup>     | 46.148(16) | Co1 <sup>i</sup> -P1-O2 <sup>i</sup>  | 31.85(8)   |
| Co1 <sup>i</sup> -Co1-O1                   | 63.30(7)   | Co1 <sup>i</sup> -P1-O3 <sup>iv</sup> | 119.24(10) |
| Co1 <sup>i</sup> -Co1-O2                   | 32.16(5)   | Co1 <sup>i</sup> -P1-C1               | 123.34(11) |
| Co1 <sup>i</sup> -Co1-O2 <sup>ii</sup>     | 87.92(6)   | Co1 <sup>i</sup> -P1-C2               | 96.74(8)   |
| Co1 <sup>i</sup> -Co1-O3                   | 146.45(5)  | Co1 <sup>i</sup> -P1-C13              | 145.05(7)  |
| Co1 <sup>i</sup> -Co1-O5 <sup>iii</sup>    | 120.24(8)  | Co1 <sup>i</sup> -P1-H1c1             | 120.96     |
| Co1 <sup>i</sup> -Co1-H1o5 <sup>iii</sup>  | 102.6(6)   | O1-P1-O2 <sup>i</sup>                 | 112.10(13) |
| Co1 <sup>i</sup> -Co1-O6                   | 103.63(7)  | O1-P1-O3 <sup>iv</sup>                | 114.75(12) |
| Co1 <sup>i</sup> -Co1-H2o6                 | 101.4(9)   | O1-P1-C1                              | 107.68(12) |
| Co1 <sup>ii</sup> -Co1-P1                  | 121.64(2)  | O1-P1-C2                              | 91.85(10)  |
| Co1 <sup>ii</sup> -Co1-P1 <sup>iii</sup>   | 57.83(2)   | O1-P1-C13                             | 88.77(11)  |
| Co1 <sup>ii</sup> -Co1-P1 <sup>ii</sup>    | 55.871(17) | O1-P1-H1c1                            | 132.03     |
| Co1 <sup>ii</sup> -Co1-O1                  | 109.27(6)  | O2 <sup>i</sup> -P1-O3 <sup>iv</sup>  | 105.73(12) |
| Co1 <sup>ii</sup> -Co1-O2                  | 77.78(6)   | O2 <sup>i</sup> -P1-C1                | 108.54(13) |
| Co1 <sup>ii</sup> -Co1-O2 <sup>ii</sup>    | 29.56(6)   | O2 <sup>i</sup> -P1-C2                | 92.79(10)  |
| Co1 <sup>ii</sup> -Co1-O3                  | 87.37(6)   | O2 <sup>i</sup> -P1-C13               | 139.13(10) |
| Co1 <sup>ii</sup> -Co1-O5 <sup>iii</sup>   | 71.57(7)   | O2 <sup>i</sup> -P1-H1c1              | 95.63      |
| Co1 <sup>ii</sup> -Co1-H1o5 <sup>iii</sup> | 52.6(5)    | O3 <sup>iv</sup> -P1-C1               | 107.84(14) |
| Co1 <sup>ii</sup> -Co1-O6                  | 159.89(7)  | O3 <sup>iv</sup> -P1-C2               | 137.35(12) |
| Co1 <sup>ii</sup> -Co1-H2o6                | 175.3(7)   | O3 <sup>iv</sup> -P1-C13              | 95.51(12)  |
| P1-Co1-P1 <sup>iii</sup>                   | 107.01(3)  | O3 <sup>iv</sup> -P1-H1c1             | 92.57      |
| P1-Co1-P1 <sup>ii</sup>                    | 100.55(2)  | C1-P1-C2                              | 29.66(12)  |
| P1-Co1-O1                                  | 20.75(5)   | C1-P1-C13                             | 30.69(12)  |
| P1-Co1-O2                                  | 81.48(6)   | C1-P1-H1c1                            | 24.38      |
| P1-Co1-O2 <sup>ii</sup>                    | 104.52(5)  | C2-P1-C13                             | 50.19(10)  |
| P1-Co1-O3                                  | 107.25(6)  | C2-P1-H1c1                            | 46.82      |
| P1-Co1-O5 <sup>iii</sup>                   | 161.18(6)  | C13-P1-H1c1                           | 48.11      |
| P1-Co1-H1o5 <sup>iii</sup>                 | 156.5(7)   | Co1-O1-P1                             | 130.46(12) |
| P1-Co1-O6                                  | 75.73(6)   | Co1-O2-Co1 <sup>i</sup>               | 118.28(9)  |
| P1-Co1-H2o6                                | 58.9(7)    | Co1-O2-P1 <sup>ii</sup>               | 124.74(11) |
| P1 <sup>iii</sup> -Co1-P1 <sup>ii</sup>    | 113.28(3)  | Co1 <sup>i</sup> -O2-P1 <sup>ii</sup> | 91.01(10)  |
| P1 <sup>iii</sup> -Co1-O1                  | 86.32(6)   | Co1-O3-P1 <sup>iii</sup>              | 94.55(12)  |
| P1 <sup>iii</sup> -Co1-O2                  | 132.70(6)  | P1-C1-C2                              | 113.5(2)   |
| P1 <sup>iii</sup> -Co1-O2 <sup>ii</sup>    | 34.58(6)   | P1-C1-C13                             | 111.02(19) |
| P1 <sup>iii</sup> -Co1-O3                  | 33.87(6)   | P1-C1-H1c1                            | 103.75     |
| P1 <sup>iii</sup> -Co1-O5 <sup>iii</sup>   | 91.34(7)   | C2-C1-C13                             | 102.7(2)   |
| P1 <sup>iii</sup> -Co1-H1o5 <sup>iii</sup> | 88.8(8)    | C2-C1-H1c1                            | 111.91     |
| P1 <sup>iii</sup> -Co1-O6                  | 130.78(8)  | C13-C1-H1c1                           | 114.33     |
| P1 <sup>iii</sup> -Co1-H2o6                | 117.5(7)   | P1-C2-C1                              | 36.87(13)  |
| P1 <sup>ii</sup> -Co1-O1                   | 108.27(7)  | P1-C2-C3                              | 109.2(2)   |
| P1 <sup>ii</sup> -Co1-O2                   | 23.41(6)   | P1-C2-C7                              | 120.8(2)   |
| P1 <sup>ii</sup> -Co1-O2 <sup>ii</sup>     | 80.33(6)   | C1-C2-C3                              | 130.3(3)   |
| P1 <sup>ii</sup> -Co1-O3                   | 142.15(6)  | C1-C2-C7                              | 109.8(3)   |
| P1 <sup>ii</sup> -Co1-O5 <sup>iii</sup>    | 75.14(8)   | C3-C2-C7                              | 119.9(3)   |
| P1 <sup>ii</sup> -Co1-H1o5 <sup>iii</sup>  | 56.5(7)    | C2-C3-C4                              | 119.7(3)   |
| P1 <sup>ii</sup> -Co1-O6                   | 114.34(8)  | C2-C3-H1c3                            | 120.15     |
| P1 <sup>ii</sup> -Co1-H2o6                 | 128.8(8)   | C4-C3-H1c3                            | 120.15     |
| O1-Co1-O2                                  | 94.37(9)   | C3-C4-C5                              | 120.3(4)   |
| O1-Co1-O2 <sup>ii</sup>                    | 86.67(8)   | C3-C4-H1c4                            | 119.86     |

|                                            |            |                            |           |
|--------------------------------------------|------------|----------------------------|-----------|
| O1-Co1-O3                                  | 91.01(9)   | C5-C4-H1c4                 | 119.86    |
| O1-Co1-O5 <sup>iii</sup>                   | 176.43(10) | C4-C5-C6                   | 120.8(4)  |
| O1-Co1-H1o5 <sup>iii</sup>                 | 160.2(4)   | C4-C5-H1c5                 | 119.62    |
| O1-Co1-O6                                  | 90.26(9)   | C6-C5-H1c5                 | 119.62    |
| O1-Co1-H2o6                                | 69.7(6)    | C5-C6-C7                   | 118.6(4)  |
| O2-Co1-O2 <sup>ii</sup>                    | 98.16(8)   | C5-C6-H1c6                 | 120.7     |
| O2-Co1-O3                                  | 165.15(9)  | C7-C6-H1c6                 | 120.7     |
| O2-Co1-O5 <sup>iii</sup>                   | 89.20(9)   | C2-C7-C6                   | 120.7(4)  |
| O2-Co1-H1o5 <sup>iii</sup>                 | 75.0(7)    | C2-C7-C8                   | 108.6(3)  |
| O2-Co1-O6                                  | 96.52(9)   | C6-C7-C8                   | 130.6(3)  |
| O2-Co1-H2o6                                | 106.8(8)   | C7-C8-C9                   | 130.7(3)  |
| O2 <sup>ii</sup> -Co1-O3                   | 68.31(8)   | C7-C8-C13                  | 108.7(3)  |
| O2 <sup>ii</sup> -Co1-O5 <sup>iii</sup>    | 92.93(8)   | C9-C8-C13                  | 120.6(3)  |
| O2 <sup>ii</sup> -Co1-H1o5 <sup>iii</sup>  | 78.5(7)    | C8-C9-C10                  | 119.1(3)  |
| O2 <sup>ii</sup> -Co1-O6                   | 165.19(10) | C8-C9-H1c9                 | 120.47    |
| O2 <sup>ii</sup> -Co1-H2o6                 | 146.5(6)   | C10-C9-H1c9                | 120.47    |
| O3-Co1-O5 <sup>iii</sup>                   | 85.55(9)   | C9-C10-C11                 | 120.7(4)  |
| O3-Co1-H1o5 <sup>iii</sup>                 | 95.6(8)    | C9-C10-H1c10               | 119.65    |
| O3-Co1-O6                                  | 97.29(10)  | C11-C10-H1c10              | 119.65    |
| O3-Co1-H2o6                                | 88.1(8)    | C10-C11-C12                | 120.4(4)  |
| O5 <sup>iii</sup> -Co1-H1o5 <sup>iii</sup> | 22.1(5)    | C10-C11-H1c11              | 119.79    |
| O5 <sup>iii</sup> -Co1-O6                  | 89.22(9)   | C12-C11-H1c11              | 119.79    |
| O5 <sup>iii</sup> -Co1-H2o6                | 109.2(6)   | C11-C12-C13                | 119.4(3)  |
| H1o5 <sup>iii</sup> -Co1-O6                | 107.3(6)   | C11-C12-H1c12              | 120.32    |
| H1o5 <sup>iii</sup> -Co1-H2o6              | 129.1(7)   | C13-C12-H1c12              | 120.32    |
| O6-Co1-H2o6                                | 22.7(5)    | P1-C13-C1                  | 38.29(12) |
| Co1 <sup>iv</sup> -P1-Co1                  | 107.01(3)  | P1-C13-C8                  | 122.4(3)  |
| Co1 <sup>iv</sup> -P1-Co1 <sup>i</sup>     | 76.02(2)   | P1-C13-C12                 | 106.6(2)  |
| Co1 <sup>iv</sup> -P1-O1                   | 135.70(8)  | C1-C13-C8                  | 110.0(3)  |
| Co1 <sup>iv</sup> -P1-O2 <sup>i</sup>      | 54.41(7)   | C1-C13-C12                 | 130.1(3)  |
| Co1 <sup>iv</sup> -P1-O3 <sup>iv</sup>     | 51.58(9)   | C8-C13-C12                 | 119.9(3)  |
| Co1 <sup>iv</sup> -P1-C1                   | 116.63(9)  | H1o4-O4-H2o4               | 104(3)    |
| Co1 <sup>iv</sup> -P1-C2                   | 127.52(7)  | Co1 <sup>iv</sup> -O5-H1o5 | 101(2)    |
| Co1 <sup>iv</sup> -P1-C13                  | 130.41(7)  | Co1 <sup>iv</sup> -O5-H2o5 | 113(2)    |
| Co1 <sup>iv</sup> -P1-H1c1                 | 92.26      | H1o5-O5-H2o5               | 104(3)    |
| Co1-P1-Co1 <sup>i</sup>                    | 69.39(2)   | Co1 <sup>iv</sup> -H1o5-O5 | 56.8(19)  |
| Co1-P1-O1                                  | 28.79(7)   | Co1-O6-H1o6                | 111.6(19) |
| Co1-P1-O2 <sup>i</sup>                     | 98.99(8)   | Co1-O6-H2o6                | 98.6(19)  |
| Co1-P1-O3 <sup>iv</sup>                    | 96.12(8)   | H1o6-O6-H2o6               | 104(3)    |
| Co1-P1-C1                                  | 136.23(9)  | Co1-H2o6-O6                | 58.7(18)  |
| Co1-P1-C2                                  | 118.89(7)  | P1-H1c1-C1                 | 51.88     |
| Co1 <sup>i</sup> -Co1-Co1 <sup>ii</sup>    | 81.923(18) | Co1-P1-C13                 | 113.20(7) |

Symmetry codes: (i)  $-x, y-1/2, -z+3/2$ ; (ii)  $-x, y+1/2, -z+3/2$ ; (iii)  $x, y+1, z$ ; (iv)  $x, y-1, z$ .



**Table S4:** Interatomic distances (Å) for  $\text{Co}(\text{H}_2\text{O})_2\text{PO}_3\text{C}-\text{C}_{12}\text{H}_9\cdot\text{H}_2\text{O}$ .

| Atom – Atom             | Length (Å) | Atom – Atom          | Length (Å) |
|-------------------------|------------|----------------------|------------|
| Co1-Co1 <sup>i</sup>    | 3.6821(11) | C3-H1c3              | 0.96       |
| Co1-Co1 <sup>ii</sup>   | 3.6821(11) | C4-C5                | 1.396(6)   |
| Co1-P1                  | 3.2563(11) | C4-H1c4              | 0.96       |
| Co1-P1 <sup>iii</sup>   | 2.7363(10) | C5-C6                | 1.381(6)   |
| Co1-P1 <sup>ii</sup>    | 3.2121(12) | C5-H1c5              | 0.96       |
| Co1-O1                  | 2.061(2)   | C6-C7                | 1.391(5)   |
| Co1-O2                  | 2.063(2)   | C6-H1c6              | 0.96       |
| Co1-O2 <sup>ii</sup>    | 2.226(2)   | C7-C8                | 1.457(5)   |
| Co1-O3                  | 2.151(2)   | C8-C9                | 1.395(6)   |
| Co1-O5 <sup>iii</sup>   | 2.134(2)   | C8-C13               | 1.404(4)   |
| Co1-H1o5 <sup>iii</sup> | 2.50(4)    | C9-C10               | 1.385(6)   |
| Co1-O6                  | 2.127(2)   | C9-H1c9              | 0.96       |
| Co1-H2o6                | 2.46(4)    | C10-C11              | 1.391(5)   |
| P1-O1                   | 1.516(2)   | C10-H1c10            | 0.96       |
| P1-O2 <sup>i</sup>      | 1.553(2)   | C11-C12              | 1.396(6)   |
| P1-O3 <sup>iv</sup>     | 1.530(2)   | C11-H1c11            | 0.96       |
| P1-C1                   | 1.830(3)   | C12-C13              | 1.389(6)   |
| P1-C2                   | 2.798(3)   | C12-H1c12            | 0.96       |
| P1-C13                  | 2.757(4)   | O4-H1o4              | 0.96(3)    |
| P1-H1c1                 | 2.2594     | O4-H2o4              | 0.96(3)    |
| C1-C2                   | 1.509(4)   | O5-H1o5              | 0.96(3)    |
| C1-C13                  | 1.507(5)   | O5-H2o5              | 0.96(3)    |
| C1-H1c1                 | 0.96       | O6-H1o6              | 0.96(3)    |
| C2-C3                   | 1.372(5)   | O6-H2o6              | 0.96(3)    |
| C2-C7                   | 1.408(5)   | Co1-Co1 <sup>i</sup> | 3.6821(11) |
| C3-C4                   | 1.388(5)   | C4-C5                | 1.396(6)   |

Symmetry codes: (i)  $-x, y-1/2, -z+3/2$  ; (ii)  $-x, y+1/2, -z+3/2$  ; (iii)  $x, y+1, z$  ; (iv)  $x, y-1, z$ .
