# Supplementary material
Source: MDPI journal article supplement (https://www.mdpi.com/2304-6740/6/3/93)
Supplement: s1 [file s1]

Archive with 3 entries (3 files):
- checkcif.pdf
- Co(H2O)2(PO3C-C12H9).H2O cif.cif
- inorganics-331444-supplementary-to final.pdf
