# Supplementary material
Source: MDPI journal article supplement (https://www.mdpi.com/2304-6740/6/3/93)
Supplement: s1 [file s1 › Co(H2O)2(PO3C-C12H9).H2O cif.cif]

#=======================================================================
data_global
#=======================================================================

_audit_creation_method                   'Jana2006 Version : 19/10/2015'


# 1. PROCESSING SUMMARY (IUCr Office Use Only)

_journal_date_recd_electronic            ?
_journal_date_to_coeditor                ?
_journal_date_from_coeditor              ?
_journal_date_accepted                   ?
_journal_date_printers_first             ?
_journal_date_printers_final             ?
_journal_date_proofs_out                 ?
_journal_date_proofs_in                  ?
_journal_coeditor_name                   ?
_journal_coeditor_code                   ?
_journal_coeditor_notes
; ?
;
_journal_techeditor_code                 ?
_journal_paper_category                  ?
_journal_techeditor_notes
; ?
;
_journal_coden_ASTM                      ?
_journal_name_full                       ''
_journal_year                            ?
_journal_volume                          ?
_journal_issue                           ?
_journal_page_first                      ?
_journal_page_last                       ?
_journal_suppl_publ_number               ?
_journal_suppl_publ_pages                ?

#=======================================================================

# 2. SUBMISSION DETAILS

_publ_contact_author_name                ?
_publ_contact_author_address
; ?
;
_publ_contact_author_email               ?
_publ_contact_author_fax                 ?
_publ_contact_author_phone               ?

_publ_requested_journal                  ''
_publ_requested_category                 ?

_publ_contact_letter
; ?
;

#=======================================================================

# 3. TITLE AND AUTHOR LIST

_publ_section_title
; ?
;
_publ_section_title_footnote
; ?
;
loop_
 _publ_author_name
 _publ_author_footnote
 _publ_author_address
; ?      # name
;
; ?      # footnote
;
; ?      # address
;

#=======================================================================

# 4. TEXT

_publ_section_synopsis
; ?
;
_publ_section_abstract
; ?
;
_publ_section_comment
; ?
;
_publ_section_introduction
; ?
;
_publ_section_experimental
; ?
;
_publ_section_exptl_prep
; ?
;
_publ_section_exptl_refinement
; ?
;
_publ_section_exptl_solution
; ?
;
_publ_section_discussion
; ?
;
_publ_section_acknowledgements
; ?
;
_publ_section_references
;
Petricek, V., Dusek, M. & Palatinus L. (2014). Z. Kristallogr. 229(5), 345-352.

#Palatinus L. & Chapuis G. (2007). J. Appl. Cryst. 40, 786-790.

# enable this reference if Diamond ver. 2 was used for visualization
#Brandenburg, K. (1999). DIAMOND. Version. 2.1c.
#Crystal Impact GbR, Bonn, Germany.

# enable this reference if Diamond ver. 3 was used for visualization
#Brandenburg, K. & Putz, H. (2005). DIAMOND Version 3.
#Crystal Impact GbR, Postfach 1251, D-53002 Bonn, Germany.

# enable this reference if SIR97 was used for solving of the structure
#Altomare, A., Burla, M. C., Camalli, M., Cascarano, G., Giacovazzo, C.,
#Guagliardi, A., Moliterni, A. G. G., Polidori, G., Spagna, R. (1997).
#SIR97. A Package for Crystal Structure Solution by Direct Methods
#and Refinement, Bari, Rome, Italy.

# use this reference if SIR2002 was used for solving of the structure
#Burla, M.C., Camalli, M., Carrozzini, B., Cascarano, G., Giacovazzo, C.,
#Polidori, G., Spagna, R.
#SIR2002: the program, J. Appl. Cryst, (2003). 36, 1103


# use this reference if SIR2011 was used for solving of the structure
Burla, M.C., Caliandro, R., Camalli, M., Carrozzini, B., Cascarano,
G.L., Giacovazzo, C., Mallamo. M., Mazzone, A., Polidori, G., Spagna, R.
SIR2011: a new package for crystal structure determination and refinement,
J.Appl.Cryst. (2012) 45, 357-361

# enable this reference if bond valences were calculated
#Brown, I. D. (1996). J. Appl. Cryst. 29, 479-480.

# enable this reference if Xshape wase used for crystal shape refinement
#Stoe & Cie (1998). X-SHAPE. Stoe & Cie, Darmstadt, Germany.


# enable this reference if Flack coefficient was refined
#Flack, H. D. (1983). Acta Cryst. A39, 876-881.
;
_publ_section_figure_captions
; ?
;
_publ_section_table_legends
; ?
;

#=======================================================================
data_I
#=======================================================================

# 5. CHEMICAL DATA

_chemical_name_systematic
; ?
;
_chemical_name_common                    ?
_chemical_formula_moiety                 ?
_chemical_formula_structural             ?
_chemical_formula_analytical             ?
_chemical_formula_iupac                  ?
_chemical_formula_sum                    'C13 H15 Co1 O6 P1'
_chemical_formula_weight                 357.2
_chemical_melting_point                  ?
_chemical_compound_source                ?
_chemical_absolute_configuration         .

#=======================================================================

# 6. CRYSTAL DATA

_symmetry_cell_setting                   monoclinic
_symmetry_space_group_name_H-M           'P 1 21/c 1'
_symmetry_space_group_name_Hall          '-P 2ybc'
_symmetry_Int_Tables_number              14

loop_
 _space_group_symop_id
 _space_group_symop_operation_xyz
 1   x,y,z
 2   -x,y+1/2,-z+1/2
 3   -x,-y,-z
 4   x,-y+1/2,z+1/2

_cell_length_a                           15.216(3)
_cell_length_b                           4.8276(8)
_cell_length_c                           19.590(3)
_cell_angle_alpha                        90
_cell_angle_beta                         107.160(4)
_cell_angle_gamma                        90
_cell_volume                             1375.0(4)

loop_
 _twin_individual_id
 _twin_individual_mass_fraction_refined
 _twin_individual_twin_matrix_11
 _twin_individual_twin_matrix_12
 _twin_individual_twin_matrix_13
 _twin_individual_twin_matrix_21
 _twin_individual_twin_matrix_22
 _twin_individual_twin_matrix_23
 _twin_individual_twin_matrix_31
 _twin_individual_twin_matrix_32
 _twin_individual_twin_matrix_33
1 0.9633(11)
1 0 0
0 1 0
0 0 1
2 0.0367(11)
-1 0 0
0 -1 0
-0.4583 0 1

_cell_formula_units_Z                    4

_cell_measurement_reflns_used     7099
_cell_measurement_temperature     296
_cell_measurement_theta_max       33.2293
_cell_measurement_theta_min       2.8021 
_cell_special_details
; ?
;

_exptl_crystal_density_diffrn            1.7156
_exptl_crystal_density_meas              ?
_exptl_crystal_density_method            ?
_exptl_crystal_F_000                     732

_exptl_absorpt_coefficient_mu            1.389
_exptl_crystal_description              needle
_exptl_crystal_colour                   'translucent light pink'
_exptl_crystal_size_max                 0.471
_exptl_crystal_size_mid                 0.098
_exptl_crystal_size_min                 0.091
_exptl_absorpt_correction_type          numerical
_exptl_absorpt_process_details          'SADABS V2012/1 (Bruker AXS Inc.)'
_exptl_absorpt_correction_T_min          0.8835
_exptl_absorpt_correction_T_max          1.0000

loop_
 _exptl_crystal_face_index_h	
 _exptl_crystal_face_index_k	
 _exptl_crystal_face_index_l	
 _exptl_crystal_face_perp_dist	
 0   1   2   0.13900   
 0  -1  -2   0.33200
 -1   0   0   0.04600 
   1   0   0   0.02900 
  -1   0   2   0.03900 
   1   0  -2   0.01400  
   1   0   1   0.03800
   2   0  -1   0.02100
#=======================================================================

# 7. EXPERIMENTAL DATA

_exptl_special_details                   ?

_diffrn_detector                      'Bruker APEX2 area detector'
_diffrn_detector_area_resol_mean      7.9
_diffrn_detector_type                 'CCD area detector'
_diffrn_measurement_device_type    'Bruker Nonius four-circles  diffractometer'
_diffrn_measurement_method            '\w and \f scans'
_diffrn_radiation_collimation         .
_diffrn_radiation_monochromator       'mirror optics'
_diffrn_radiation_source                'microfocus sealed X-ray tube'
_diffrn_source_type                   'Incoatec I\ms'
_diffrn_radiation_type                   'Mo K\a'
_diffrn_radiation_wavelength             0.71069

_diffrn_ambient_temperature              296
_diffrn_source_power                     '30W'
_diffrn_source_voltage                   '50kV'
_diffrn_source_current                   '600\mA'

_diffrn_reflns_number                    21476
_diffrn_reflns_theta_min                 1.4
_diffrn_reflns_theta_max                 33.47
_diffrn_reflns_theta_full                33.47
_diffrn_measured_fraction_theta_max      ?
_diffrn_measured_fraction_theta_full     86
_diffrn_reflns_av_R_equivalents          0.0371
_diffrn_reflns_av_unetI/netI             0.0465
_diffrn_reflns_limit_h_min               -22
_diffrn_reflns_limit_h_max               23
_diffrn_reflns_limit_k_min               -7
_diffrn_reflns_limit_k_max               7
_diffrn_reflns_limit_l_min               -29
_diffrn_reflns_limit_l_max               30
_diffrn_reflns_reduction_process         ?

_diffrn_standards_number                 ?
_diffrn_standards_interval_count         ?
_diffrn_standards_interval_time          ?
_diffrn_standards_decay_%                ?
loop_
_diffrn_standard_refln_index_h
_diffrn_standard_refln_index_k
_diffrn_standard_refln_index_l
  ? ? ?

_diffrn_radiation_probe                  X-ray

#=======================================================================

# 8. REFINEMENT DATA

_refine_special_details
; ?
;

_reflns_number_total                     5348
_reflns_number_gt                        3811
_reflns_threshold_expression             'I>3\s(I)'

_refine_ls_structure_factor_coef         F
_refine_ls_R_factor_gt                   0.0462
_refine_ls_wR_factor_gt                  0.0744
_refine_ls_R_factor_all                  0.0770
_refine_ls_wR_factor_ref                 0.0877
_refine_ls_goodness_of_fit_ref           1.72
_refine_ls_goodness_of_fit_gt            1.74
_refine_ls_restrained_S_gt               ?
_refine_ls_restrained_S_all              ?
_refine_ls_number_reflns                 5348
_refine_ls_number_parameters             191
_refine_ls_number_restraints             0
_refine_ls_number_constraints            0
_refine_ls_weighting_scheme              sigma
_refine_ls_weighting_details             'w=1/(\s^2^(F)+0.0009F^2^)'
_refine_ls_hydrogen_treatment            'mixed'
_refine_ls_shift/su_max                  0.0037
_refine_ls_shift/su_mean                 0.0002
_refine_diff_density_max                 0.63
_refine_diff_density_min                 -0.76
_refine_ls_extinction_method             'none'
_refine_ls_extinction_coef               ?
_refine_ls_abs_structure_details         ?
_refine_ls_abs_structure_Flack           ?
_refine_ls_abs_structure_Rogers          ?

loop_
 _atom_type_symbol
 _atom_type_scat_dispersion_real
 _atom_type_scat_dispersion_imag
 _atom_type_scat_source
 C    0.0033  0.0016
 'International Tables Vol C tables 4.2.6.8 and 6.1.1.1'
 H    0.0000  0.0000
 'International Tables Vol C tables 4.2.6.8 and 6.1.1.1'
 Co   0.3494  0.9721
 'International Tables Vol C tables 4.2.6.8 and 6.1.1.1'
 O    0.0106  0.0060
 'International Tables Vol C tables 4.2.6.8 and 6.1.1.1'
 P    0.1023  0.0942
 'International Tables Vol C tables 4.2.6.8 and 6.1.1.1'

_computing_data_collection        'APEX2 suite'
_computing_cell_refinement        'SAINT V8.30C (Bruker AXS Inc., 2013)'
_computing_data_reduction         'SAINT V8.30C (Bruker AXS Inc., 2013)'
_computing_structure_solution     'SIR2011 J.Appl.Cryst. (2012) 45, 357-361'
_computing_structure_refinement         'Jana2006'
_computing_molecular_graphics            ?
_computing_publication_material          ?

loop_
 _restr_distance_atom_site_label_1
 _restr_distance_site_symmetry_1
 _restr_distance_atom_site_label_2
 _restr_distance_site_symmetry_2
 _restr_distance_target
 _restr_distance_target_weight_param
O4 . H1o4 . 0.959 0.001
O4 . H2o4 . 0.959 0.001
O5 . H1o5 . 0.959 0.001
O5 . H2o5 . 0.959 0.001
O6 . H1o6 . 0.959 0.001
O6 . H2o6 . 0.959 0.001

loop_
 _restr_angle_atom_site_label_1
 _restr_angle_site_symmetry_1
 _restr_angle_atom_site_label_2
 _restr_angle_site_symmetry_2
 _restr_angle_atom_site_label_3
 _restr_angle_site_symmetry_3
 _restr_angle_target
 _restr_angle_target_weight_param
H1o4 . O4 . H2o4 . 104.45 0.01
H1o5 . O5 . H2o5 . 104.45 0.01
H1o6 . O6 . H2o6 . 104.45 0.01

loop_
 _restr_torsion_atom_site_label_1
 _restr_torsion_site_symmetry_1
 _restr_torsion_atom_site_label_2
 _restr_torsion_site_symmetry_2
 _restr_torsion_atom_site_label_3
 _restr_torsion_site_symmetry_3
 _restr_torsion_atom_site_label_4
 _restr_torsion_site_symmetry_4
 _restr_torsion_angle_target
 _restr_torsion_weight_param
 ? ? ? ? ? ? ? ? ? ?

loop_
 _restr_equal_distance_atom_site_label_1
 _restr_equal_distance_site_symmetry_1
 _restr_equal_distance_atom_site_label_2
 _restr_equal_distance_site_symmetry_2
 _restr_equal_distance_class_class_id
 _restr_equal_distance_class_target_weight_param
 ? ? ? ? ? ?

loop_
 _restr_equal_angle_atom_site_label_1
 _restr_equal_angle_site_symmetry_1
 _restr_equal_angle_atom_site_label_2
 _restr_equal_angle_site_symmetry_2
 _restr_equal_angle_atom_site_label_3
 _restr_equal_angle_site_symmetry_3
 _restr_equal_angle_class_class_id
 _restr_equal_angle_class_target_weight_param
 ? ? ? ? ? ? ? ?

loop_
 _restr_equal_torsion_atom_site_label_1
 _restr_equal_torsion_site_symmetry_1
 _restr_equal_torsion_atom_site_label_2
 _restr_equal_torsion_site_symmetry_2
 _restr_equal_torsion_atom_site_label_3
 _restr_equal_torsion_site_symmetry_3
 _restr_equal_torsion_atom_site_label_4
 _restr_equal_torsion_site_symmetry_4
 _restr_equal_torsion_class_class_id
 _restr_equal_torsion_class_target_weight_param
 ? ? ? ? ? ? ? ? ? ?


#=======================================================================

# 9. ATOMIC COORDINATES AND DISPLACEMENT PARAMETERS

loop_
 _atom_site_label
 _atom_site_type_symbol
 _atom_site_fract_x
 _atom_site_fract_y
 _atom_site_fract_z
 _atom_site_adp_type
 _atom_site_U_iso_or_equiv
 _atom_site_site_symmetry_multiplicity
 _atom_site_occupancy
 _atom_site_calc_flag
 _atom_site_refinement_flags
 _atom_site_disorder_assembly
 _atom_site_disorder_group
  Co1 Co 0.00571(3) 0.97164(8) 0.82215(2) Uani 0.01406(12) 4 1 d . . .
  P1 P -0.11568(5) 0.40478(14) 0.79390(4) Uani 0.0127(2) 4 1 d . . .
  O1 O -0.10822(13) 0.7178(4) 0.79278(13) Uani 0.0184(6) 4 1 d . . .
  O2 O 0.07398(13) 0.7647(4) 0.76087(11) Uani 0.0154(6) 4 1 d . . .
  O3 O -0.06758(14) 1.2704(4) 0.86596(12) Uani 0.0188(6) 4 1 d . . .
  C1 C -0.23792(18) 0.3165(6) 0.77052(17) Uani 0.0170(8) 4 1 d . . .
  C2 C -0.29261(19) 0.4159(6) 0.69727(18) Uani 0.0194(9) 4 1 d . . .
  C3 C -0.2881(2) 0.3394(8) 0.63096(19) Uani 0.0277(11) 4 1 d . . .
  C4 C -0.3470(3) 0.4604(8) 0.5704(2) Uani 0.0344(12) 4 1 d . . .
  C5 C -0.4092(2) 0.6644(9) 0.5769(2) Uani 0.0372(13) 4 1 d . . .
  C6 C -0.4155(2) 0.7413(8) 0.6431(2) Uani 0.0326(12) 4 1 d . . .
  C7 C -0.3573(2) 0.6155(7) 0.70355(19) Uani 0.0225(9) 4 1 d . . .
  C8 C -0.3521(2) 0.6426(7) 0.77868(20) Uani 0.0226(10) 4 1 d . . .
  C9 C -0.4042(2) 0.8020(8) 0.8119(2) Uani 0.0308(12) 4 1 d . . .
  C10 C -0.3879(2) 0.7789(9) 0.8851(2) Uani 0.0368(13) 4 1 d . . .
  C11 C -0.3201(3) 0.6019(9) 0.9252(2) Uani 0.0344(13) 4 1 d . . .
  C12 C -0.2676(2) 0.4429(7) 0.8922(2) Uani 0.0285(11) 4 1 d . . .
  C13 C -0.2838(2) 0.4628(6) 0.81881(19) Uani 0.0200(9) 4 1 d . . .
  O4 O -0.1057(2) 0.9248(7) 0.96715(16) Uani 0.0405(10) 4 1 d . . .
  H1o4 H -0.145(3) 0.770(6) 0.9495(18) Uiso 0.0486 4 1 d . . .
  H2o4 H -0.107(3) 1.030(7) 0.9252(11) Uiso 0.0486 4 1 d . . .
  O5 O 0.11970(15) 0.2480(5) 0.85676(14) Uani 0.0257(8) 4 1 d . . .
  H1o5 H 0.129(3) 0.298(7) 0.8120(10) Uiso 0.0308 4 1 d . . .
  H2o5 H 0.104(3) 0.419(4) 0.8754(18) Uiso 0.0308 4 1 d . . .
  O6 O 0.06033(17) 0.7353(5) 0.91682(13) Uani 0.0263(7) 4 1 d . . .
  H1o6 H 0.083(2) 0.852(7) 0.9579(13) Uiso 0.0316 4 1 d . . .
  H2o6 H 0.0038(15) 0.661(8) 0.9212(18) Uiso 0.0316 4 1 d . . .
  H1c1 H -0.238031 0.11811 0.774021 Uiso 0.0203 4 1 d . . .
  H1c3 H -0.244296 0.202656 0.62646 Uiso 0.0333 4 1 d . . .
  H1c4 H -0.345087 0.403793 0.52391 Uiso 0.0413 4 1 d . . .
  H1c5 H -0.447978 0.752107 0.534719 Uiso 0.0447 4 1 d . . .
  H1c6 H -0.459193 0.878643 0.647453 Uiso 0.0391 4 1 d . . .
  H1c9 H -0.450567 0.925879 0.784417 Uiso 0.037 4 1 d . . .
  H1c10 H -0.42382 0.886331 0.908304 Uiso 0.0441 4 1 d . . .
  H1c11 H -0.30933 0.588888 0.975902 Uiso 0.0413 4 1 d . . .
  H1c12 H -0.220834 0.32091 0.919983 Uiso 0.0342 4 1 d . . .

loop_
 _atom_site_aniso_label
 _atom_site_aniso_type_symbol
 _atom_site_aniso_U_11
 _atom_site_aniso_U_22
 _atom_site_aniso_U_33
 _atom_site_aniso_U_12
 _atom_site_aniso_U_13
 _atom_site_aniso_U_23
 Co1 Co 0.01746(19) 0.00905(16) 0.0169(2) 0.00143(12) 0.00703(14) -0.00046(14)
 P1 P 0.0141(3) 0.0080(3) 0.0173(4) 0.0000(2) 0.0068(2) 0.0001(3)
 O1 O 0.0193(9) 0.0067(8) 0.0309(12) -0.0019(7) 0.0098(8) -0.0010(8)
 O2 O 0.0174(9) 0.0113(8) 0.0208(11) 0.0001(6) 0.0108(8) 0.0000(8)
 O3 O 0.0222(10) 0.0156(9) 0.0193(11) 0.0033(7) 0.0073(8) 0.0024(9)
 C1 C 0.0155(11) 0.0149(11) 0.0226(15) -0.0022(9) 0.0088(10) -0.0016(11)
 C2 C 0.0147(12) 0.0190(12) 0.0241(16) -0.0045(9) 0.0053(10) -0.0009(12)
 C3 C 0.0254(15) 0.0303(16) 0.0277(18) -0.0010(13) 0.0083(13) -0.0034(15)
 C4 C 0.0365(19) 0.043(2) 0.0230(18) -0.0037(16) 0.0078(15) 0.0003(17)
 C5 C 0.0293(17) 0.043(2) 0.033(2) -0.0009(15) -0.0007(15) 0.0090(19)
 C6 C 0.0231(15) 0.0337(18) 0.039(2) 0.0036(13) 0.0059(14) 0.0058(17)
 C7 C 0.0163(12) 0.0244(14) 0.0273(17) -0.0028(11) 0.0069(11) -0.0012(13)
 C8 C 0.0164(12) 0.0224(14) 0.0302(18) -0.0002(10) 0.0086(11) -0.0005(13)
 C9 C 0.0234(15) 0.0327(17) 0.038(2) 0.0071(13) 0.0116(14) -0.0045(17)
 C10 C 0.0273(17) 0.042(2) 0.046(2) 0.0065(15) 0.0185(16) -0.009(2)
 C11 C 0.0364(19) 0.042(2) 0.031(2) -0.0004(16) 0.0193(16) -0.0060(18)
 C12 C 0.0284(16) 0.0311(17) 0.0296(19) 0.0017(13) 0.0143(14) -0.0001(15)
 C13 C 0.0173(12) 0.0184(12) 0.0266(17) -0.0027(10) 0.0101(11) -0.0002(12)
 O4 O 0.0512(17) 0.0435(17) 0.0273(15) -0.0100(13) 0.0126(13) 0.0021(14)
 O5 O 0.0232(10) 0.0222(11) 0.0318(14) -0.0025(8) 0.0084(9) -0.0055(10)
 O6 O 0.0303(11) 0.0251(11) 0.0232(12) 0.0012(9) 0.0073(9) 0.0026(10)

loop_
 _jana_atom_site_ADP_C_label
 _jana_atom_site_ADP_C_type_symbol
 _jana_atom_site_ADP_C_111
 _jana_atom_site_ADP_C_112
 _jana_atom_site_ADP_C_113
 _jana_atom_site_ADP_C_122
 _jana_atom_site_ADP_C_123
 _jana_atom_site_ADP_C_133
 _jana_atom_site_ADP_C_222
 _jana_atom_site_ADP_C_223
 _jana_atom_site_ADP_C_233
 _jana_atom_site_ADP_C_333
 ? ? ? ? ? ? ? ? ? ? ? ?

loop_
 _jana_atom_site_ADP_D_label
 _jana_atom_site_ADP_D_type_symbol
 _jana_atom_site_ADP_D_1111
 _jana_atom_site_ADP_D_1112
 _jana_atom_site_ADP_D_1113
 _jana_atom_site_ADP_D_1122
 _jana_atom_site_ADP_D_1123
 _jana_atom_site_ADP_D_1133
 _jana_atom_site_ADP_D_1222
 _jana_atom_site_ADP_D_1223
 _jana_atom_site_ADP_D_1233
 _jana_atom_site_ADP_D_1333
 _jana_atom_site_ADP_D_2222
 _jana_atom_site_ADP_D_2223
 _jana_atom_site_ADP_D_2233
 _jana_atom_site_ADP_D_2333
 _jana_atom_site_ADP_D_3333
 ? ? ? ? ? ? ? ? ? ? ? ? ? ? ? ? ?

loop_
 _jana_atom_site_ADP_E_label
 _jana_atom_site_ADP_E_type_symbol
 _jana_atom_site_ADP_E_11111
 _jana_atom_site_ADP_E_11112
 _jana_atom_site_ADP_E_11113
 _jana_atom_site_ADP_E_11122
 _jana_atom_site_ADP_E_11123
 _jana_atom_site_ADP_E_11133
 _jana_atom_site_ADP_E_11222
 _jana_atom_site_ADP_E_11223
 _jana_atom_site_ADP_E_11233
 _jana_atom_site_ADP_E_11333
 _jana_atom_site_ADP_E_12222
 _jana_atom_site_ADP_E_12223
 _jana_atom_site_ADP_E_12233
 _jana_atom_site_ADP_E_12333
 _jana_atom_site_ADP_E_13333
 _jana_atom_site_ADP_E_22222
 _jana_atom_site_ADP_E_22223
 _jana_atom_site_ADP_E_22233
 _jana_atom_site_ADP_E_22333
 _jana_atom_site_ADP_E_23333
 _jana_atom_site_ADP_E_33333
 ? ? ? ? ? ? ? ? ? ? ? ? ? ? ? ? ? ? ? ? ? ? ?

loop_
 _jana_atom_site_ADP_F_label
 _jana_atom_site_ADP_F_type_symbol
 _jana_atom_site_ADP_F_111111
 _jana_atom_site_ADP_F_111112
 _jana_atom_site_ADP_F_111113
 _jana_atom_site_ADP_F_111122
 _jana_atom_site_ADP_F_111123
 _jana_atom_site_ADP_F_111133
 _jana_atom_site_ADP_F_111222
 _jana_atom_site_ADP_F_111223
 _jana_atom_site_ADP_F_111233
 _jana_atom_site_ADP_F_111333
 _jana_atom_site_ADP_F_112222
 _jana_atom_site_ADP_F_112223
 _jana_atom_site_ADP_F_112233
 _jana_atom_site_ADP_F_112333
 _jana_atom_site_ADP_F_113333
 _jana_atom_site_ADP_F_122222
 _jana_atom_site_ADP_F_122223
 _jana_atom_site_ADP_F_122233
 _jana_atom_site_ADP_F_122333
 _jana_atom_site_ADP_F_123333
 _jana_atom_site_ADP_F_133333
 _jana_atom_site_ADP_F_222222
 _jana_atom_site_ADP_F_222223
 _jana_atom_site_ADP_F_222233
 _jana_atom_site_ADP_F_222333
 _jana_atom_site_ADP_F_223333
 _jana_atom_site_ADP_F_233333
 _jana_atom_site_ADP_F_333333
 ? ? ? ? ? ? ? ? ? ? ? ? ? ? ? ? ? ? ? ? ? ? ? ? ? ? ? ? ? ?


#=======================================================================

# 10. MOLECULAR GEOMETRY


loop_
 _geom_bond_atom_site_label_1
 _geom_bond_atom_site_label_2
 _geom_bond_site_symmetry_1
 _geom_bond_site_symmetry_2
 _geom_bond_distance
 _geom_bond_publ_flag
  H1o4 O4 . . 0.96(3) ?
  H2o4 O4 . . 0.96(3) ?
  H1o5 Co1 . 1_545 2.50(4) ?
  H1o5 O5 . . 0.96(3) ?
  H2o5 O5 . . 0.96(3) ?
  H1o6 O6 . . 0.96(3) ?
  H2o6 Co1 . . 2.46(4) ?
  H2o6 O6 . . 0.96(3) ?

loop_
 _geom_angle_atom_site_label_1
 _geom_angle_atom_site_label_2
 _geom_angle_atom_site_label_3
 _geom_angle_site_symmetry_1
 _geom_angle_site_symmetry_2
 _geom_angle_site_symmetry_3
 _geom_angle
 _geom_angle_publ_flag
  Co1 H1o5 O5 1_545 . . 56.8(19) ?
  Co1 H2o6 O6 . . . 58.7(18) ?

loop_
 _geom_torsion_atom_site_label_1
 _geom_torsion_atom_site_label_2
 _geom_torsion_atom_site_label_3
 _geom_torsion_atom_site_label_4
 _geom_torsion_site_symmetry_1
 _geom_torsion_site_symmetry_2
 _geom_torsion_site_symmetry_3
 _geom_torsion_site_symmetry_4
 _geom_torsion
 _geom_torsion_publ_flag
 ? ? ? ? ? ? ? ? ? ?

loop_
 _geom_hbond_atom_site_label_D
 _geom_hbond_atom_site_label_H
 _geom_hbond_atom_site_label_A
 _geom_hbond_site_symmetry_D
 _geom_hbond_site_symmetry_H
 _geom_hbond_site_symmetry_A
 _geom_hbond_distance_DH
 _geom_hbond_distance_HA
 _geom_hbond_distance_DA
 _geom_hbond_angle_DHA
 _geom_hbond_publ_flag
  O4 H1o4 C12 . . .   0.96(3)   2.45(3)   3.392(5)   169(3) ?
  O4 H2o4 O3 . . .   0.96(3)   1.86(4)   2.780(4)   159(3) ?
  O5 H1o5 O1 . . 2_546   0.96(3)   2.02(2)   2.887(4)   149(3) ?
  O5 H2o5 O6 . . .   0.96(3)   1.94(3)   2.892(4)   172(4) ?
  O6 H1o6 O4 . . 3_577   0.96(3)   1.77(3)   2.722(4)   171(3) ?
  O6 H2o6 O3 . . 1_545   0.96(3)   2.28(3)   2.945(3)   126(3) ?
  O6 H2o6 O4 . . .   0.96(3)   2.47(3)   3.108(5)   124(3) ?


#=======================================================================

# 11. STRUCTURE-FACTOR LIST

loop_
 _refln_index_h
 _refln_index_k
 _refln_index_l
 _refln_F_squared_calc
 _refln_F_squared_meas
 _refln_F_squared_sigma
 _refln_observed_status
 ? ? ? ? ? ? ?

loop_
 _twin_refln_datum_id
 _twin_refln_individual_id
 _twin_refln_index_h
 _twin_refln_index_k
 _twin_refln_index_l
 _twin_refln_F_squared_calc
 _twin_refln_F_squared_meas
 _twin_refln_F_squared_sigma
 _twin_refln_include_status
         1    2  -1   0   0 27381.10   -11.89     0.38 <
         1    1   1   0   0 27381.10   -11.89     0.38 <
         2    2  -2   0   0  7312.27  8197.27    75.57 o
         2    1   2   0   0  7312.27  8197.27    75.57 o
         3    2  -3   0   0 31374.50 36257.50   332.95 o
         3    1   3   0   0 31374.50 36257.50   332.95 o
         4    2  -4   0   0  4943.12  5866.59    55.62 o
         4    1   4   0   0  4943.12  5866.59    55.62 o
         5    2  -5   0   0  2770.15  3397.05    32.22 o
         5    1   5   0   0  2770.15  3397.05    32.22 o
         6    2  -6   0   0  2400.92  3131.99    30.69 o
         6    1   6   0   0  2400.92  3131.99    30.69 o
         7    2  -7   0   0  4743.65  4914.53    46.03 o
         7    1   7   0   0  4743.65  4914.53    46.03 o
         8    2  -8   0   0  9343.73  9954.87    88.99 o
         8    1   8   0   0  9343.73  9954.87    88.99 o
         9    2  -9   0   0  6658.71  7054.56    65.21 o
         9    1   9   0   0  6658.71  7054.56    65.21 o
        10    2 -10   0   0  7317.40  8282.43    76.33 o
        10    1  10   0   0  7317.40  8282.43    76.33 o
        11    2 -11   0   0  2120.97  2655.96    29.92 o
        11    1  11   0   0  2120.97  2655.96    29.92 o
        12    2 -12   0   0   605.09   768.33    14.58 o
        12    1  12   0   0   605.09   768.33    14.58 o
        13    2 -13   0   0     7.44    43.73     8.44 o
        13    1  13   0   0     7.44    43.73     8.44 o
        14    2 -14   0   0  1192.11  1196.79    25.70 o
        14    1  14   0   0  1192.11  1196.79    25.70 o
        15    2 -15   0   0  1282.58  1299.98    28.39 o
        15    1  15   0   0  1282.58  1299.98    28.39 o
        16    2 -16   0   0   880.74   889.16    29.92 o
        16    1  16   0   0   880.74   889.16    29.92 o
        17    2 -17   0   0  5550.93  5764.56    94.36 o
        17    1  17   0   0  5550.93  5764.56    94.36 o
        18    2 -18   0   0  1411.87  1487.17    41.04 o
        18    1  18   0   0  1411.87  1487.17    41.04 o
        19    2 -19   0   0   159.80   225.55    26.85 o
        19    1  19   0   0   159.80   225.55    26.85 o
        20    2 -20   0   0   157.10   211.74    29.15 o
        20    1  20   0   0   157.10   211.74    29.15 o
        21    2 -21   0   0    36.92    38.36    24.55 <
        21    1  21   0   0    36.92    38.36    24.55 <
        22    2 -22   0   0    24.83    34.14    24.55 <
        22    1  22   0   0    24.83    34.14    24.55 <
        23    2  -1  -1   0    17.92    24.17     1.92 o
        23    1   1   1   0    17.92    24.17     1.92 o
        24    2  -2  -1   0 11527.60 14211.20    93.60 o
        24    1   2   1   0 11527.60 14211.20    93.60 o
        25    2  -3  -1   0  5956.68  6952.91    46.03 o
        25    1   3   1   0  5956.68  6952.91    46.03 o
        26    2  -4  -1   0 10342.00 12340.00    86.69 o
        26    1   4   1   0 10342.00 12340.00    86.69 o
        27    2  -5  -1   0 10558.80 12691.00    89.38 o
        27    1   5   1   0 10558.80 12691.00    89.38 o
        28    2  -6  -1   0   454.91   467.98     8.06 o
        28    1   6   1   0   454.91   467.98     8.06 o
        29    2  -7  -1   0  1595.00  1904.90    17.65 o
        29    1   7   1   0  1595.00  1904.90    17.65 o
        30    2  -8  -1   0    29.43    22.63     3.45 o
        30    1   8   1   0    29.43    22.63     3.45 o
        31    2  -9  -1   0    30.00    29.92     3.84 o
        31    1   9   1   0    30.00    29.92     3.84 o
        32    2 -10  -1   0  1461.88  1496.38    15.34 o
        32    1  10   1   0  1461.88  1496.38    15.34 o
        33    2 -11  -1   0   641.23   684.32    11.51 o
        33    1  11   1   0   641.23   684.32    11.51 o
        34    2 -12  -1   0   319.60   330.65     8.82 o
        34    1  12   1   0   319.60   330.65     8.82 o
        35    2 -13  -1   0   690.93   663.22    11.89 o
        35    1  13   1   0   690.93   663.22    11.89 o
        36    2 -14  -1   0    96.38    98.58     8.82 o
        36    1  14   1   0    96.38    98.58     8.82 o
        37    2 -15  -1   0     0.05    -9.59     7.67 <
        37    1  15   1   0     0.05    -9.59     7.67 <
        38    2 -16  -1   0    42.79    49.48     9.21 o
        38    1  16   1   0    42.79    49.48     9.21 o
        39    2 -17  -1   0   151.81   141.93    11.89 o
        39    1  17   1   0   151.81   141.93    11.89 o
        40    2 -18  -1   0   233.99   230.92    16.49 o
        40    1  18   1   0   233.99   230.92    16.49 o
        41    2 -19  -1   0   433.97   450.72    21.10 o
        41    1  19   1   0   433.97   450.72    21.10 o
        42    2 -20  -1   0    13.51    19.95    12.66 <
        42    1  20   1   0    13.51    19.95    12.66 <
        43    2 -21  -1   0    30.67    42.96    14.19 o
        43    1  21   1   0    30.67    42.96    14.19 o
        44    2 -22  -1   0    46.07     4.99    21.86 <
        44    1  22   1   0    46.07     4.99    21.86 <
        45    2   0  -2   0   248.13   414.66     9.21 o
        45    1   0   2   0   248.13   414.66     9.21 o
        46    2  -1  -2   0   878.39   831.23     8.82 o
        46    1   1   2   0   878.39   831.23     8.82 o
        47    2  -2  -2   0    60.52    31.84     2.69 o
        47    1   2   2   0    60.52    31.84     2.69 o
        48    2  -3  -2   0  6657.28  7848.97    56.77 o
        48    1   3   2   0  6657.28  7848.97    56.77 o
        49    2  -4  -2   0 11679.80 14526.10   108.56 o
        49    1   4   2   0 11679.80 14526.10   108.56 o
        50    2  -5  -2   0  2625.38  2965.90    25.32 o
        50    1   5   2   0  2625.38  2965.90    25.32 o
        51    2  -6  -2   0 16129.50 18527.70   123.90 o
        51    1   6   2   0 16129.50 18527.70   123.90 o
        52    2  -7  -2   0  7977.86  9035.41    70.96 o
        52    1   7   2   0  7977.86  9035.41    70.96 o
        53    2  -8  -2   0  5140.34  5385.57    49.48 o
        53    1   8   2   0  5140.34  5385.57    49.48 o
        54    2  -9  -2   0  4502.01  4898.03    40.66 o
        54    1   9   2   0  4502.01  4898.03    40.66 o
        55    2 -10  -2   0  1825.33  1925.61    21.86 o
        55    1  10   2   0  1825.33  1925.61    21.86 o
        56    2 -11  -2   0  3731.71  3863.88    39.51 o
        56    1  11   2   0  3731.71  3863.88    39.51 o
        57    2 -12  -2   0   344.58   376.68    11.89 o
        57    1  12   2   0   344.58   376.68    11.89 o
        58    2 -13  -2   0   169.20   189.11     9.21 o
        58    1  13   2   0   169.20   189.11     9.21 o
        59    2 -14  -2   0   555.67   580.75    16.49 o
        59    1  14   2   0   555.67   580.75    16.49 o
        60    2 -15  -2   0   140.49   172.62    11.89 o
        60    1  15   2   0   140.49   172.62    11.89 o
        61    2 -16  -2   0   161.81   164.94    16.11 o
        61    1  16   2   0   161.81   164.94    16.11 o
        62    2 -17  -2   0    91.43   104.34    17.65 o
        62    1  17   2   0    91.43   104.34    17.65 o
        63    2 -18  -2   0   399.86   463.37    29.15 o
        63    1  18   2   0   399.86   463.37    29.15 o
        64    2 -19  -2   0   290.82   278.87    31.07 o
        64    1  19   2   0   290.82   278.87    31.07 o
        65    2 -20  -2   0   236.62   194.86    38.36 o
        65    1  20   2   0   236.62   194.86    38.36 o
        66    2 -21  -2   0   271.94   222.87    39.51 o
        66    1  21   2   0   271.94   222.87    39.51 o
        67    2  -1  -3   0  1131.24  1245.13    13.43 o
        67    1   1   3   0  1131.24  1245.13    13.43 o
        68    2  -2  -3   0    39.86    26.85     3.45 o
        68    1   2   3   0    39.86    26.85     3.45 o
        69    2  -3  -3   0    14.22     6.90     3.07 <
        69    1   3   3   0    14.22     6.90     3.07 <
        70    2  -4  -3   0   600.85   550.45     8.06 o
        70    1   4   3   0   600.85   550.45     8.06 o
        71    2  -5  -3   0   845.58   808.60    11.89 o
        71    1   5   3   0   845.58   808.60    11.89 o
        72    2  -6  -3   0  3675.37  3971.67    34.52 o
        72    1   6   3   0  3675.37  3971.67    34.52 o
        73    2  -7  -3   0  2191.37  2321.09    27.62 o
        73    1   7   3   0  2191.37  2321.09    27.62 o
        74    2  -8  -3   0   730.99   771.40    18.03 o
        74    1   8   3   0   730.99   771.40    18.03 o
        75    2  -9  -3   0   339.18   392.03    13.43 o
        75    1   9   3   0   339.18   392.03    13.43 o
        76    2 -10  -3   0  1877.50  1953.61    31.45 o
        76    1  10   3   0  1877.50  1953.61    31.45 o
        77    2 -11  -3   0  4042.84  4312.29    56.77 o
        77    1  11   3   0  4042.84  4312.29    56.77 o
        78    2 -12  -3   0  1436.30  1631.02    29.54 o
        78    1  12   3   0  1436.30  1631.02    29.54 o
        79    2 -13  -3   0   159.12   162.26    11.89 o
        79    1  13   3   0   159.12   162.26    11.89 o
        80    2 -14  -3   0   184.51   225.17    17.65 o
        80    1  14   3   0   184.51   225.17    17.65 o
        81    2 -15  -3   0   101.77   145.76    15.34 o
        81    1  15   3   0   101.77   145.76    15.34 o
        82    2 -16  -3   0   187.05   210.59    18.80 o
        82    1  16   3   0   187.05   210.59    18.80 o
        83    2 -17  -3   0   122.74   118.14    18.80 o
        83    1  17   3   0   122.74   118.14    18.80 o
        84    2 -18  -3   0   106.99    84.39    24.55 o
        84    1  18   3   0   106.99    84.39    24.55 o
        85    2 -19  -3   0   244.26   197.16    42.96 o
        85    1  19   3   0   244.26   197.16    42.96 o
        86    2 -20  -3   0   109.26   127.74    39.13 o
        86    1  20   3   0   109.26   127.74    39.13 o
        87    2   0  -4   0  2452.48  2429.26    32.60 o
        87    1   0   4   0  2452.48  2429.26    32.60 o
        88    2  -1  -4   0  3512.84  3643.70    31.84 o
        88    1   1   4   0  3512.84  3643.70    31.84 o
        89    2  -2  -4   0  3860.60  4105.54    34.91 o
        89    1   2   4   0  3860.60  4105.54    34.91 o
        90    2  -3  -4   0  1286.44  1418.89    17.65 o
        90    1   3   4   0  1286.44  1418.89    17.65 o
        91    2  -4  -4   0  1626.77  1790.97    20.71 o
        91    1   4   4   0  1626.77  1790.97    20.71 o
        92    2  -5  -4   0  1406.19  1474.51    18.41 o
        92    1   5   4   0  1406.19  1474.51    18.41 o
        93    2  -6  -4   0    53.08    70.20     7.67 o
        93    1   6   4   0    53.08    70.20     7.67 o
        94    2  -7  -4   0   364.62   354.43    12.27 o
        94    1   7   4   0   364.62   354.43    12.27 o
        95    2  -8  -4   0    54.99    69.43     8.82 o
        95    1   8   4   0    54.99    69.43     8.82 o
        96    2  -9  -4   0    16.73    37.98     8.44 o
        96    1   9   4   0    16.73    37.98     8.44 o
        97    2 -10  -4   0   463.84   494.45    17.65 o
        97    1  10   4   0   463.84   494.45    17.65 o
        98    2 -11  -4   0   312.42   341.01    16.11 o
        98    1  11   4   0   312.42   341.01    16.11 o
        99    2 -12  -4   0  1089.06  1224.03    34.91 o
        99    1  12   4   0  1089.06  1224.03    34.91 o
       100    2 -13  -4   0  1103.50  1197.56    34.91 o
       100    1  13   4   0  1103.50  1197.56    34.91 o
       101    2 -14  -4   0   635.70   624.48    28.00 o
       101    1  14   4   0   635.70   624.48    28.00 o
       102    2 -15  -4   0   840.24   845.04    32.60 o
       102    1  15   4   0   840.24   845.04    32.60 o
       103    2 -16  -4   0   282.82   317.23    23.78 o
       103    1  16   4   0   282.82   317.23    23.78 o
       104    2 -17  -4   0    45.83    69.05    16.88 o
       104    1  17   4   0    45.83    69.05    16.88 o
       105    2 -18  -4   0   113.59    77.87    22.25 o
       105    1  18   4   0   113.59    77.87    22.25 o
       106    2 -19  -4   0    59.54    -4.22    36.82 <
       106    1  19   4   0    59.54    -4.22    36.82 <
       107    2  -1  -5   0   119.29   117.76    10.74 o
       107    1   1   5   0   119.29   117.76    10.74 o
       108    2  -2  -5   0    10.77    18.41     8.44 <
       108    1   2   5   0    10.77    18.41     8.44 <
       109    2  -3  -5   0    72.64    83.24    10.36 o
       109    1   3   5   0    72.64    83.24    10.36 o
       110    2  -4  -5   0   712.85   712.71    24.55 o
       110    1   4   5   0   712.85   712.71    24.55 o
       111    2  -5  -5   0   169.02   203.68    15.73 o
       111    1   5   5   0   169.02   203.68    15.73 o
       112    2  -6  -5   0   344.29   388.19    19.56 o
       112    1   6   5   0   344.29   388.19    19.56 o
       113    2  -7  -5   0   288.08   277.72    22.25 o
       113    1   7   5   0   288.08   277.72    22.25 o
       114    2  -8  -5   0    18.78    24.93    13.43 <
       114    1   8   5   0    18.78    24.93    13.43 <
       115    2  -9  -5   0    13.89    19.95    12.27 <
       115    1   9   5   0    13.89    19.95    12.27 <
       116    2 -10  -5   0   167.76   179.90    17.26 o
       116    1  10   5   0   167.76   179.90    17.26 o
       117    2 -11  -5   0    67.22    95.51    16.49 o
       117    1  11   5   0    67.22    95.51    16.49 o
       118    2 -12  -5   0    31.53    56.77    15.73 o
       118    1  12   5   0    31.53    56.77    15.73 o
       119    2 -13  -5   0    11.02    13.04    14.19 <
       119    1  13   5   0    11.02    13.04    14.19 <
       120    2 -14  -5   0    15.12    22.63    14.96 <
       120    1  14   5   0    15.12    22.63    14.96 <
       121    2 -15  -5   0   312.68   369.78    27.23 o
       121    1  15   5   0   312.68   369.78    27.23 o
       122    2 -16  -5   0   167.93   166.86    22.25 o
       122    1  16   5   0   167.93   166.86    22.25 o
       123    2   0  -6   0   381.06   389.34    39.89 o
       123    1   0   6   0   381.06   389.34    39.89 o
       124    2  -1  -6   0   142.32   149.98    16.11 o
       124    1   1   6   0   142.32   149.98    16.11 o
       125    2  -2  -6   0    15.03     8.06    11.12 <
       125    1   2   6   0    15.03     8.06    11.12 <
       126    2  -3  -6   0   543.31   589.57    25.32 o
       126    1   3   6   0   543.31   589.57    25.32 o
       127    2  -4  -6   0  1547.33  1621.04    40.28 o
       127    1   4   6   0  1547.33  1621.04    40.28 o
       128    2  -5  -6   0  1796.70  1790.59    42.19 o
       128    1   5   6   0  1796.70  1790.59    42.19 o
       129    2  -6  -6   0   734.68   751.83    36.82 o
       129    1   6   6   0   734.68   751.83    36.82 o
       130    2  -7  -6   0   109.16   130.80    21.86 o
       130    1   7   6   0   109.16   130.80    21.86 o
       131    2  -8  -6   0    50.59    63.68    19.56 o
       131    1   8   6   0    50.59    63.68    19.56 o
       132    2  -9  -6   0     0.96    11.12    17.65 <
       132    1   9   6   0     0.96    11.12    17.65 <
       133    2 -10  -6   0     1.03    -3.84    17.65 <
       133    1  10   6   0     1.03    -3.84    17.65 <
       134    2 -11  -6   0   104.69   147.30    26.47 o
       134    1  11   6   0   104.69   147.30    26.47 o
       135    2 -12  -6   0   338.56   413.51    34.91 o
       135    1  12   6   0   338.56   413.51    34.91 o
       136    2 -13  -6   0   359.70   418.88    35.67 o
       136    1  13   6   0   359.70   418.88    35.67 o
       137    2  -1  -7   0     1.34    20.71    18.03 <
       137    1   1   7   0     1.34    20.71    18.03 <
       138    2  -2  -7   0   271.03   303.42    28.77 o
       138    1   2   7   0   271.03   303.42    28.77 o
       139    2  -3  -7   0   268.01   290.38    29.15 o
       139    1   3   7   0   268.01   290.38    29.15 o
       140    2  -4  -7   0     6.69    23.02    28.00 <
       140    1   4   7   0     6.69    23.02    28.00 <
       141    2  -5  -7   0    13.51    57.92    32.60 <
       141    1   5   7   0    13.51    57.92    32.60 <
       142    2  -6  -7   0    64.79   123.13    37.98 o
       142    1   6   7   0    64.79   123.13    37.98 o
       143    2  -7  -7   0   101.61   141.93    38.74 o
       143    1   7   7   0   101.61   141.93    38.74 o
       144    1 -22   1   1    20.55    24.93    14.19 <
       145    1 -21   1   1    72.29    36.82    13.04 <
       146    1 -20   1   1    32.55    47.18    13.81 o
       147    1 -19   1   1   290.28   292.29    18.80 o
       148    1 -18   1   1   616.65   598.78    23.78 o
       149    1 -17   1   1    20.73    18.80     8.82 <
       150    1 -16   1   1   102.20   105.87    11.51 o
       151    1 -15   1   1    42.72    33.37     9.21 o
       152    1 -14   1   1   267.60   266.59    11.89 o
       153    1 -13   1   1   178.08   189.88     8.06 o
       154    1 -12   1   1   433.52   476.42     9.97 o
       155    1 -11   1   1   177.54   232.45     7.67 o
       156    1 -10   1   1     6.90    13.43     4.22 o
       157    1  -9   1   1     7.13    15.34     4.22 o
       158    1  -8   1   1   426.64   458.77     8.82 o
       159    1  -7   1   1   643.01   653.25     9.59 o
       160    1  -6   1   1  3022.41  3305.76    26.47 o
       161    1  -5   1   1  2709.77  3030.34    25.70 o
       162    1  -4   1   1  5671.04  6489.15    45.26 o
       163    1  -3   1   1  1422.99  1382.45    12.27 o
       164    1  -2   1   1  4223.05  4497.57    33.76 o
       165    1  -1   1   1  7212.45  7975.17    48.33 o
       166    1   0   1   1  3323.12  3572.74    24.93 o
       167    1   1   1   1 19818.50 21640.50   151.13 o
       168    1   2   1   1  3113.31  3244.77    31.84 o
       169    1   3   1   1  1849.21  1818.59    17.26 o
       170    1   4   1   1  4684.32  5018.86    37.59 o
       171    1   5   1   1  1365.51  1467.61    12.27 o
       172    1   6   1   1    16.47    18.41     2.69 o
       173    1   7   1   1   152.04   144.61     4.60 o
       174    1   8   1   1  1335.48  1333.73    14.58 o
       175    1   9   1   1  2693.85  2570.04    23.02 o
       176    1  10   1   1  2295.77  2179.16    21.10 o
       177    1  11   1   1  3228.34  3316.88    29.15 o
       178    1  12   1   1  3577.98  3660.96    31.84 o
       179    1  13   1   1   326.67   345.61     9.21 o
       180    1  14   1   1   434.75   415.04    13.04 o
       181    1  15   1   1   396.54   354.82    14.19 o
       182    1  16   1   1    25.94    18.03     8.82 <
       183    1  17   1   1   440.89   415.43    16.88 o
       184    1  18   1   1   884.63   821.26    25.32 o
       185    1  19   1   1   451.32   472.96    19.95 o
       186    1  20   1   1   822.00   812.44    32.22 o
       187    1  21   1   1   514.88   565.41    36.82 o
       188    1  22   1   1   168.78   179.90    27.62 o
       189    1 -21   2   1    34.68     4.22    31.45 <
       190    1 -20   2   1    58.77     8.82    30.69 <
       191    1 -19   2   1     5.24    13.43    28.39 <
       192    1 -18   2   1   558.08   563.11    33.37 o
       193    1 -17   2   1   563.65   531.27    19.95 o
       194    1 -16   2   1   413.33   375.92    14.96 o
       195    1 -15   2   1   266.57   261.61    12.66 o
       196    1 -14   2   1    69.20    65.59     8.44 o
       197    1 -13   2   1    11.55    10.36     6.14 <
       198    1 -12   2   1   137.02   125.05     8.06 o
       199    1 -11   2   1    20.14    28.00     6.52 o
       200    1 -10   2   1  1685.21  1781.00    25.32 o
       201    1  -9   2   1   354.55   326.05     9.97 o
       202    1  -8   2   1  1027.60   943.63    13.81 o
       203    1  -7   2   1  7762.37  7986.68    66.36 o
       204    1  -6   2   1   324.10   370.93     8.44 o
       205    1  -5   2   1   939.20   949.00    11.51 o
       206    1  -4   2   1  2032.86  2352.54    21.86 o
       207    1  -3   2   1  1232.41  1428.86    12.66 o
       208    1  -2   2   1   186.24   263.91     4.99 o
       209    1  -1   2   1  2208.29  2201.79    17.26 o
       210    1   0   2   1  6382.06  6564.72    43.73 o
       211    1   1   2   1  4328.72  4804.44    32.99 o
       212    1   2   2   1  1123.28  1125.45    10.74 o
       213    1   3   2   1  1061.28  1204.85    12.66 o
       214    1   4   2   1    92.59   146.91     5.37 o
       215    1   5   2   1    64.54    76.33     4.99 o
       216    1   6   2   1   230.53   238.21     7.29 o
       217    1   7   2   1   268.33   277.72     8.44 o
       218    1   8   2   1  1112.13  1053.33    17.65 o
       219    1   9   2   1   318.86   295.36    10.74 o
       220    1  10   2   1  1508.13  1462.62    22.63 o
       221    1  11   2   1    94.85   119.68    10.36 o
       222    1  12   2   1    53.23    36.44     9.21 o
       223    1  13   2   1    32.41    32.60     9.59 o
       224    1  14   2   1   176.05   181.44    15.34 o
       225    1  15   2   1     4.31     6.52    11.51 <
       226    1  16   2   1   100.05    92.83    14.19 o
       227    1  17   2   1   255.12   285.77    23.02 o
       228    1  18   2   1   447.50   438.44    28.00 o
       229    1  19   2   1     0.28   -11.51    21.10 <
       230    1  20   2   1     4.26   -27.23    20.33 <
       231    1  21   2   1     6.32    16.11    23.40 <
       232    1 -20   3   1     0.26     6.14    36.06 <
       233    1 -19   3   1     5.00   -49.87    30.30 <
       234    1 -18   3   1    20.81   -23.40    21.10 <
       235    1 -17   3   1     2.77     6.14    13.04 <
       236    1 -16   3   1   107.52   150.37    16.88 o
       237    1 -15   3   1    24.11    42.58    12.66 o
       238    1 -14   3   1    10.96    18.41    11.12 <
       239    1 -13   3   1    10.81    26.85    10.74 <
       240    1 -12   3   1    67.59    73.65     9.21 o
       241    1 -11   3   1     7.58    13.81     5.37 <
       242    1 -10   3   1     2.11     4.60     4.22 <
       243    1  -9   3   1   626.19   597.63    13.81 o
       244    1  -8   3   1   249.51   251.25     7.67 o
       245    1  -7   3   1   335.88   405.07     9.59 o
       246    1  -6   3   1   296.99   311.47     9.21 o
       247    1  -5   3   1     0.51     4.99     3.07 <
       248    1  -4   3   1   609.33   566.94     9.21 o
       249    1  -3   3   1   800.77   794.41     9.97 o
       250    1  -2   3   1  1779.98  1785.60    17.26 o
       251    1  -1   3   1  4076.35  4253.61    32.99 o
       252    1   0   3   1   535.93   472.20     8.44 o
       253    1   1   3   1   500.21   450.33     8.44 o
       254    1   2   3   1   333.76   287.31     6.14 o
       255    1   3   3   1   150.75   141.93     5.37 o
       256    1   4   3   1   141.56   139.63     6.90 o
       257    1   5   3   1   583.48   545.46     9.59 o
       258    1   6   3   1  1690.37  1624.88    19.18 o
       259    1   7   3   1   521.65   489.07    12.27 o
       260    1   8   3   1  2289.75  2197.57    29.92 o
       261    1   9   3   1  1261.71  1193.34    26.08 o
       262    1  10   3   1    70.02    72.11     8.06 o
       263    1  11   3   1   715.39   694.68    18.41 o
       264    1  12   3   1   305.34   321.45    14.19 o
       265    1  13   3   1   534.13   547.38    18.03 o
       266    1  14   3   1   295.42   290.38    19.18 o
       267    1  15   3   1   364.17   368.24    21.48 o
       268    1  16   3   1  1344.73  1244.74    37.21 o
       269    1  17   3   1   205.58   209.05    21.10 o
       270    1  18   3   1   109.61    47.18    21.86 <
       271    1  19   3   1   270.08   258.54    42.96 o
       272    1  20   3   1   101.69    31.45    35.29 <
       273    1 -19   4   1   229.19   168.78    46.41 o
       274    1 -18   4   1   584.52   522.06    39.89 o
       275    1 -17   4   1   647.16   602.62    31.07 o
       276    1 -16   4   1   297.09   303.03    23.02 o
       277    1 -15   4   1   170.64   178.75    19.56 o
       278    1 -14   4   1   162.84   131.57    16.88 o
       279    1 -13   4   1    31.75    54.85    13.04 o
       280    1 -12   4   1   146.09   160.34    16.11 o
       281    1 -11   4   1   406.33   386.27    21.48 o
       282    1 -10   4   1  1377.81  1292.31    26.85 o
       283    1  -9   4   1  1343.95  1331.05    27.23 o
       284    1  -8   4   1  1932.10  1831.63    31.84 o
       285    1  -7   4   1  3138.12  2977.02    32.99 o
       286    1  -6   4   1  2242.69  2118.94    23.78 o
       287    1  -5   4   1     3.60     1.15     4.99 <
       288    1  -4   4   1    43.34    43.73     5.75 o
       289    1  -3   4   1   744.10   756.43    13.81 o
       290    1  -2   4   1   135.77   135.41     7.29 o
       291    1  -1   4   1  1750.81  1608.38    19.18 o
       292    1   0   4   1  2677.87  2454.58    25.32 o
       293    1   1   4   1  2056.15  1902.60    21.48 o
       294    1   2   4   1  1840.66  1728.06    21.86 o
       295    1   3   4   1   178.02   178.37     8.44 o
       296    1   4   4   1   103.86   116.61     7.29 o
       297    1   5   4   1    40.60    29.54     4.99 o
       298    1   6   4   1    13.32    14.58     4.99 <
       299    1   7   4   1   807.07   775.23    16.88 o
       300    1   8   4   1   931.67   881.87    21.10 o
       301    1   9   4   1  1463.73  1381.68    27.62 o
       302    1  10   4   1   802.28   759.89    21.48 o
       303    1  11   4   1  1041.15  1057.17    25.32 o
       304    1  12   4   1   106.82   127.74    14.96 o
       305    1  13   4   1   189.70   186.42    17.65 o
       306    1  14   4   1    22.72    37.21    13.81 <
       307    1  15   4   1     8.51    41.04    14.58 <
       308    1  16   4   1    25.01    20.71    14.96 <
       309    1  17   4   1   138.31   122.36    18.80 o
       310    1  18   4   1   153.70   125.05    23.40 o
       311    1 -17   5   1    39.24    65.21    38.36 <
       312    1 -16   5   1    70.75    94.36    19.95 o
       313    1 -15   5   1    68.32    76.33    17.65 o
       314    1 -14   5   1   312.97   300.73    24.55 o
       315    1 -13   5   1    65.91    51.02    15.34 o
       316    1 -12   5   1    67.93    96.28    16.88 o
       317    1 -11   5   1   192.02   181.44    18.41 o
       318    1 -10   5   1   245.48   211.36    18.80 o
       319    1  -9   5   1   152.13   150.37    16.11 o
       320    1  -8   5   1    75.00    74.03    16.49 o
       321    1  -7   5   1     1.04    -6.14    13.04 <
       322    1  -6   5   1    40.40    58.69    11.89 o
       323    1  -5   5   1   140.63   156.50    14.96 o
       324    1  -4   5   1     4.19    15.73     8.44 <
       325    1  -3   5   1   401.02   406.60    14.19 o
       326    1  -2   5   1    56.67    62.91     8.82 o
       327    1  -1   5   1   194.04   211.36    11.51 o
       328    1   0   5   1   189.23   212.89    11.51 o
       329    1   1   5   1    37.20    44.50     8.06 o
       330    1   2   5   1    79.59    87.07     9.21 o
       331    1   3   5   1     1.18     9.59     9.59 <
       332    1   4   5   1    23.45    20.33    10.36 <
       333    1   5   5   1  1232.96  1108.19    28.39 o
       334    1   6   5   1   870.81   777.92    24.55 o
       335    1   7   5   1   894.36   879.95    32.99 o
       336    1   8   5   1   357.25   332.95    24.17 o
       337    1   9   5   1   138.42   136.94    16.11 o
       338    1  10   5   1    54.85    86.69    14.96 o
       339    1  11   5   1    71.09    83.24    15.73 o
       340    1  12   5   1     5.37    11.89    13.43 <
       341    1  13   5   1   145.46   147.30    19.56 o
       342    1  14   5   1   290.58   270.05    23.40 o
       343    1  15   5   1   437.29   456.09    29.92 o
       344    1  16   5   1   314.69   308.02    26.08 o
       345    1 -13   6   1   808.26   808.99    59.46 o
       346    1 -12   6   1   910.03   859.62    44.88 o
       347    1 -11   6   1   606.37   618.73    39.89 o
       348    1 -10   6   1   230.23   197.93    26.08 o
       349    1  -9   6   1   121.33   124.28    23.02 o
       350    1  -8   6   1    86.03    70.58    19.18 o
       351    1  -7   6   1   163.81   131.19    21.10 o
       352    1  -6   6   1   519.90   520.53    33.37 o
       353    1  -5   6   1   693.62   640.97    28.00 o
       354    1  -4   6   1   922.10   869.98    31.07 o
       355    1  -3   6   1  1702.67  1620.27    39.51 o
       356    1  -2   6   1   434.34   412.36    29.15 o
       357    1  -1   6   1    81.77   104.72    18.03 o
       358    1   0   6   1   905.24   868.06    29.15 o
       359    1   1   6   1   255.35   237.82    18.41 o
       360    1   2   6   1   212.26   215.19    18.03 o
       361    1   3   6   1  1298.52  1164.19    33.37 o
       362    1   4   6   1  1068.45  1089.01    32.99 o
       363    1   5   6   1  1317.42  1238.60    44.11 o
       364    1   6   6   1   476.68   512.09    33.37 o
       365    1   7   6   1   101.09   101.27    21.48 o
       366    1   8   6   1   257.02   260.07    27.23 o
       367    1   9   6   1     2.17    19.18    17.65 <
       368    1  10   6   1     1.97     5.37    18.03 <
       369    1  11   6   1   173.58   215.58    27.23 o
       370    1  12   6   1   193.83   170.70    27.62 o
       371    1  13   6   1   283.52   272.35    30.30 o
       372    1  -8   7   1    29.13    64.44    34.14 <
       373    1  -7   7   1    91.44   125.82    38.74 o
       374    1  -6   7   1   205.43   156.89    39.13 o
       375    1  -5   7   1     0.04    12.66    32.22 <
       376    1  -4   7   1    87.35    97.05    34.14 <
       377    1  -3   7   1   108.06   122.75    23.02 o
       378    1  -2   7   1   429.92   449.18    34.52 o
       379    1  -1   7   1   275.25   281.55    28.77 o
       380    1   0   7   1    70.27    69.81    20.71 o
       381    1   1   7   1     0.13    27.62    18.03 <
       382    1   2   7   1   152.79   165.71    23.78 o
       383    1   3   7   1    18.02    26.47    18.80 <
       384    1   4   7   1     8.34    37.98    30.69 <
       385    1   5   7   1     4.19    15.34    29.92 <
       386    1   6   7   1   178.60   202.53    41.81 o
       387    1   7   7   1   167.26   159.57    39.89 o
       388    2  21   0   2    33.64    26.08    26.08 <
       388    1 -22   0   2    33.64    26.08    26.08 <
       389    2  20   0   2     7.94   -22.25    21.48 <
       389    1 -21   0   2     7.94   -22.25    21.48 <
       390    2  19   0   2   193.08   182.20    28.39 o
       390    1 -20   0   2   193.08   182.20    28.39 o
       391    2  18   0   2     4.99    21.10    19.95 <
       391    1 -19   0   2     4.99    21.10    19.95 <
       392    2  17   0   2  1391.15  1348.31    52.55 o
       392    1 -18   0   2  1391.15  1348.31    52.55 o
       393    2  16   0   2  4620.62  4668.26   102.80 o
       393    1 -17   0   2  4620.62  4668.26   102.80 o
       394    2  15   0   2   580.22   709.64    38.36 o
       394    1 -16   0   2   580.22   709.64    38.36 o
       395    2  14   0   2  1899.23  1748.01    33.37 o
       395    1 -15   0   2  1899.23  1748.01    33.37 o
       396    2  13   0   2  1370.77  1277.35    27.23 o
       396    1 -14   0   2  1370.77  1277.35    27.23 o
       397    2  12   0   2    44.67    33.76     6.90 o
       397    1 -13   0   2    44.67    33.76     6.90 o
       398    2  11   0   2   412.48   515.16    12.66 o
       398    1 -12   0   2   412.48   515.16    12.66 o
       399    2  10   0   2  1652.77  1807.47    22.63 o
       399    1 -11   0   2  1652.77  1807.47    22.63 o
       400    2   9   0   2  4599.04  5045.33    49.10 o
       400    1 -10   0   2  4599.04  5045.33    49.10 o
       401    2   8   0   2  5415.32  5725.43    54.47 o
       401    1  -9   0   2  5415.32  5725.43    54.47 o
       402    2   7   0   2 12444.20 13211.50   160.34 o
       402    1  -8   0   2 12444.20 13211.50   160.34 o
       403    2   6   0   2  8943.40  9431.66    98.97 o
       403    1  -7   0   2  8943.40  9431.66    98.97 o
       404    2   5   0   2   859.57   720.76    13.81 o
       404    1  -6   0   2   859.57   720.76    13.81 o
       405    2   4   0   2   288.01   267.36    11.12 o
       405    1  -5   0   2   288.01   267.36    11.12 o
       406    2   3   0   2   135.04   181.05     8.44 o
       406    1  -4   0   2   135.04   181.05     8.44 o
       407    2   2   0   2  3790.58  4570.45    46.80 o
       407    1  -3   0   2  3790.58  4570.45    46.80 o
       408    2   1   0   2   531.80    61.37     3.45 o
       408    1  -2   0   2   531.80    61.37     3.45 o
       409    2   0   0   2  6343.70  7414.75    78.64 o
       409    1  -1   0   2  6343.70  7414.75    78.64 o
       410    2  -1   0   2 36443.70 37482.30   322.21 o
       410    1   0   0   2 36443.70 37482.30   322.21 o
       411    2  -2   0   2 13617.80 14203.50   140.78 o
       411    1   1   0   2 13617.80 14203.50   140.78 o
       412    2  -3   0   2  4283.03  4471.10    39.13 o
       412    1   2   0   2  4283.03  4471.10    39.13 o
       413    2  -4   0   2  1053.74  1095.91    11.89 o
       413    1   3   0   2  1053.74  1095.91    11.89 o
       414    2  -5   0   2   447.64   503.27     7.67 o
       414    1   4   0   2   447.64   503.27     7.67 o
       415    2  -6   0   2    52.14    89.38     4.60 o
       415    1   5   0   2    52.14    89.38     4.60 o
       416    2  -7   0   2   516.81  1356.37    22.63 o
       416    1   6   0   2   516.81  1356.37    22.63 o
       417    2  -8   0   2   473.91  1838.92    39.89 o
       417    1   7   0   2   473.91  1838.92    39.89 o
       418    2  -9   0   2  2174.88  2446.52    26.08 o
       418    1   8   0   2  2174.88  2446.52    26.08 o
       419    2 -10   0   2  1909.15  2259.33    25.32 o
       419    1   9   0   2  1909.15  2259.33    25.32 o
       420    2 -11   0   2   625.71   729.97    12.66 o
       420    1  10   0   2   625.71   729.97    12.66 o
       421    2 -12   0   2  1191.70  1310.72    18.41 o
       421    1  11   0   2  1191.70  1310.72    18.41 o
       422    2 -13   0   2    25.62    28.00     5.37 o
       422    1  12   0   2    25.62    28.00     5.37 o
       423    2 -14   0   2    71.07   136.17    10.36 o
       423    1  13   0   2    71.07   136.17    10.36 o
       424    2 -15   0   2   143.81   261.22    14.96 o
       424    1  14   0   2   143.81   261.22    14.96 o
       425    2 -16   0   2   661.69   695.83    21.10 o
       425    1  15   0   2   661.69   695.83    21.10 o
       426    2 -17   0   2   417.40   769.86    22.63 o
       426    1  16   0   2   417.40   769.86    22.63 o
       427    2 -18   0   2   618.61   703.12    28.77 o
       427    1  17   0   2   618.61   703.12    28.77 o
       428    2 -19   0   2     0.33    -1.15    13.43 <
       428    1  18   0   2     0.33    -1.15    13.43 <
       429    2 -20   0   2    36.62    26.85    14.58 <
       429    1  19   0   2    36.62    26.85    14.58 <
       430    2 -21   0   2     1.70   -12.66    13.81 <
       430    1  20   0   2     1.70   -12.66    13.81 <
       431    2 -22   0   2    73.29    61.37    17.65 o
       431    1  21   0   2    73.29    61.37    17.65 o
       432    2 -23   0   2   202.34   140.39    20.71 o
       432    1  22   0   2   202.34   140.39    20.71 o
       433    2  21  -1   2     6.57    -0.38    13.81 <
       433    1 -22   1   2     6.57    -0.38    13.81 <
       434    2  20  -1   2   183.86   172.23    17.26 o
       434    1 -21   1   2   183.86   172.23    17.26 o
       435    2  19  -1   2   241.34   258.15    19.18 o
       435    1 -20   1   2   241.34   258.15    19.18 o
       436    2  18  -1   2   221.19   213.27    17.65 o
       436    1 -19   1   2   221.19   213.27    17.65 o
       437    2  17  -1   2     1.50    -4.99    10.74 <
       437    1 -18   1   2     1.50    -4.99    10.74 <
       438    2  16  -1   2   236.82   222.48    15.73 o
       438    1 -17   1   2   236.82   222.48    15.73 o
       439    2  15  -1   2    73.14    74.42    10.36 o
       439    1 -16   1   2    73.14    74.42    10.36 o
       440    2  14  -1   2    37.59    54.47     8.44 o
       440    1 -15   1   2    37.59    54.47     8.44 o
       441    2  13  -1   2    92.71   131.19     9.59 o
       441    1 -14   1   2    92.71   131.19     9.59 o
       442    2  12  -1   2   370.54   367.48    12.66 o
       442    1 -13   1   2   370.54   367.48    12.66 o
       443    2  11  -1   2   248.34   230.54     7.67 o
       443    1 -12   1   2   248.34   230.54     7.67 o
       444    2  10  -1   2   103.78   132.72     6.52 o
       444    1 -11   1   2   103.78   132.72     6.52 o
       445    2   9  -1   2   131.68   185.27     6.90 o
       445    1 -10   1   2   131.68   185.27     6.90 o
       446    2   8  -1   2     1.89     2.30     3.84 <
       446    1  -9   1   2     1.89     2.30     3.84 <
       447    2   7  -1   2    52.93    70.96     4.60 o
       447    1  -8   1   2    52.93    70.96     4.60 o
       448    2   6  -1   2    58.58    56.00     3.84 o
       448    1  -7   1   2    58.58    56.00     3.84 o
       449    2   5  -1   2  2718.67  3064.48    26.47 o
       449    1  -6   1   2  2718.67  3064.48    26.47 o
       450    2   4  -1   2   563.16   938.26    11.12 o
       450    1  -5   1   2   563.16   938.26    11.12 o
       451    2   3  -1   2   303.39   364.79    13.04 o
       451    1  -4   1   2   303.39   364.79    13.04 o
       452    2   2  -1   2  6876.15  7522.16    60.99 o
       452    1  -3   1   2  6876.15  7522.16    60.99 o
       453    2   1  -1   2  1843.48  2131.98    17.65 o
       453    1  -2   1   2  1843.48  2131.98    17.65 o
       454    2   0  -1   2   744.64   830.47     8.06 o
       454    1  -1   1   2   744.64   830.47     8.06 o
       455    2  -1  -1   2   119.66   122.75     5.37 o
       455    1   0   1   2   119.66   122.75     5.37 o
       456    2  -2  -1   2   273.37   166.48     9.97 o
       456    1   1   1   2   273.37   166.48     9.97 o
       457    2  -3  -1   2  1471.29  1785.60    22.63 o
       457    1   2   1   2  1471.29  1785.60    22.63 o
       458    2  -4  -1   2  1925.39  1834.32    20.71 o
       458    1   3   1   2  1925.39  1834.32    20.71 o
       459    2  -5  -1   2  1544.85  1574.63    17.65 o
       459    1   4   1   2  1544.85  1574.63    17.65 o
       460    2  -6  -1   2  2053.02  2377.09    29.92 o
       460    1   5   1   2  2053.02  2377.09    29.92 o
       461    2  -7  -1   2   117.59    97.81     4.60 o
       461    1   6   1   2   117.59    97.81     4.60 o
       462    2  -8  -1   2   128.39   150.75     4.60 o
       462    1   7   1   2   128.39   150.75     4.60 o
       463    2  -9  -1   2    30.16    33.37     3.45 o
       463    1   8   1   2    30.16    33.37     3.45 o
       464    2 -10  -1   2   578.93   551.60     8.44 o
       464    1   9   1   2   578.93   551.60     8.44 o
       465    2 -11  -1   2   211.02   231.30     6.52 o
       465    1  10   1   2   211.02   231.30     6.52 o
       466    2 -12  -1   2   344.52   374.77     9.21 o
       466    1  11   1   2   344.52   374.77     9.21 o
       467    2 -13  -1   2    70.04    95.90     6.14 o
       467    1  12   1   2    70.04    95.90     6.14 o
       468    2 -14  -1   2   587.20   588.04    11.51 o
       468    1  13   1   2   587.20   588.04    11.51 o
       469    2 -15  -1   2   121.64   123.90     8.44 o
       469    1  14   1   2   121.64   123.90     8.44 o
       470    2 -16  -1   2    33.85    34.52     8.82 o
       470    1  15   1   2    33.85    34.52     8.82 o
       471    2 -17  -1   2     8.88    13.81     8.44 <
       471    1  16   1   2     8.88    13.81     8.44 <
       472    2 -18  -1   2     0.21     2.30     8.82 <
       472    1  17   1   2     0.21     2.30     8.82 <
       473    2 -19  -1   2   217.06   201.77    15.34 o
       473    1  18   1   2   217.06   201.77    15.34 o
       474    2 -20  -1   2    94.43    96.66    21.10 o
       474    1  19   1   2    94.43    96.66    21.10 o
       475    2 -21  -1   2    65.26   101.65    22.63 o
       475    1  20   1   2    65.26   101.65    22.63 o
       476    2 -22  -1   2    88.12    83.24    22.63 o
       476    1  21   1   2    88.12    83.24    22.63 o
       477    2  21  -2   2   134.37    90.14    38.36 <
       477    1 -22   2   2   134.37    90.14    38.36 <
       478    2  20  -2   2   652.35   540.09    52.94 o
       478    1 -21   2   2   652.35   540.09    52.94 o
       479    2  19  -2   2   154.20   142.31    19.56 o
       479    1 -20   2   2   154.20   142.31    19.56 o
       480    2  18  -2   2   250.31   220.18    20.71 o
       480    1 -19   2   2   250.31   220.18    20.71 o
       481    2  17  -2   2   713.18   655.17    27.62 o
       481    1 -18   2   2   713.18   655.17    27.62 o
       482    2  16  -2   2   555.59   512.47    19.95 o
       482    1 -17   2   2   555.59   512.47    19.95 o
       483    2  15  -2   2  1169.58  1080.57    21.86 o
       483    1 -16   2   2  1169.58  1080.57    21.86 o
       484    2  14  -2   2   823.60   780.98    18.41 o
       484    1 -15   2   2   823.60   780.98    18.41 o
       485    2  13  -2   2  2281.41  2133.90    30.69 o
       485    1 -14   2   2  2281.41  2133.90    30.69 o
       486    2  12  -2   2  1195.07  1113.56    21.10 o
       486    1 -13   2   2  1195.07  1113.56    21.10 o
       487    2  11  -2   2    43.04    62.14     7.29 o
       487    1 -12   2   2    43.04    62.14     7.29 o
       488    2  10  -2   2   779.41   760.66    16.88 o
       488    1 -11   2   2   779.41   760.66    16.88 o
       489    2   9  -2   2   677.63   697.75    16.11 o
       489    1 -10   2   2   677.63   697.75    16.11 o
       490    2   8  -2   2   824.10   971.63    14.19 o
       490    1  -9   2   2   824.10   971.63    14.19 o
       491    2   7  -2   2   602.60   664.37    13.43 o
       491    1  -8   2   2   602.60   664.37    13.43 o
       492    2   6  -2   2  6432.94  6643.36    52.94 o
       492    1  -7   2   2  6432.94  6643.36    52.94 o
       493    2   5  -2   2 12225.70 13005.50   104.34 o
       493    1  -6   2   2 12225.70 13005.50   104.34 o
       494    2   4  -2   2  2534.94  2832.41    24.17 o
       494    1  -5   2   2  2534.94  2832.41    24.17 o
       495    2   3  -2   2  5410.30  5768.39    42.96 o
       495    1  -4   2   2  5410.30  5768.39    42.96 o
       496    2   2  -2   2  3136.95  3414.31    26.08 o
       496    1  -3   2   2  3136.95  3414.31    26.08 o
       497    2   1  -2   2   480.30   512.09     7.29 o
       497    1  -2   2   2   480.30   512.09     7.29 o
       498    2   0  -2   2    20.37     1.53     2.69 <
       498    1  -1   2   2    20.37     1.53     2.69 <
       499    2  -1  -2   2    21.71     4.99     3.07 <
       499    1   0   2   2    21.71     4.99     3.07 <
       500    2  -2  -2   2  2179.17  2097.84    21.48 o
       500    1   1   2   2  2179.17  2097.84    21.48 o
       501    2  -3  -2   2  3117.16  3362.15    36.44 o
       501    1   2   2   2  3117.16  3362.15    36.44 o
       502    2  -4  -2   2  1792.90  1956.30    23.78 o
       502    1   3   2   2  1792.90  1956.30    23.78 o
       503    2  -5  -2   2  3875.07  4169.22    39.51 o
       503    1   4   2   2  3875.07  4169.22    39.51 o
       504    2  -6  -2   2  3240.44  4051.07    39.13 o
       504    1   5   2   2  3240.44  4051.07    39.13 o
       505    2  -7  -2   2   339.26   886.85    21.10 o
       505    1   6   2   2   339.26   886.85    21.10 o
       506    2  -8  -2   2  1078.35  1102.43    15.34 o
       506    1   7   2   2  1078.35  1102.43    15.34 o
       507    2  -9  -2   2   873.01   895.29    14.19 o
       507    1   8   2   2   873.01   895.29    14.19 o
       508    2 -10  -2   2    35.81    74.80     9.59 o
       508    1   9   2   2    35.81    74.80     9.59 o
       509    2 -11  -2   2   634.59   637.52    15.73 o
       509    1  10   2   2   634.59   637.52    15.73 o
       510    2 -12  -2   2   268.36   231.69    12.66 o
       510    1  11   2   2   268.36   231.69    12.66 o
       511    2 -13  -2   2    45.55   122.36    10.74 o
       511    1  12   2   2    45.55   122.36    10.74 o
       512    2 -14  -2   2    95.44   251.25    13.81 o
       512    1  13   2   2    95.44   251.25    13.81 o
       513    2 -15  -2   2    89.10   146.15    12.66 o
       513    1  14   2   2    89.10   146.15    12.66 o
       514    2 -16  -2   2    43.82    99.35    13.81 o
       514    1  15   2   2    43.82    99.35    13.81 o
       515    2 -17  -2   2    28.96    93.60    16.88 o
       515    1  16   2   2    28.96    93.60    16.88 o
       516    2 -18  -2   2    30.26    56.00    16.11 o
       516    1  17   2   2    30.26    56.00    16.11 o
       517    2 -19  -2   2    30.95    59.84    17.65 o
       517    1  18   2   2    30.95    59.84    17.65 o
       518    2 -20  -2   2    41.41    50.25    21.86 <
       518    1  19   2   2    41.41    50.25    21.86 <
       519    2 -21  -2   2    42.11    55.24    23.40 <
       519    1  20   2   2    42.11    55.24    23.40 <
       520    2 -22  -2   2    29.29     8.44    23.78 <
       520    1  21   2   2    29.29     8.44    23.78 <
       521    2  20  -3   2    13.16   -49.48    33.76 <
       521    1 -21   3   2    13.16   -49.48    33.76 <
       522    2  19  -3   2    72.74    17.26    33.76 <
       522    1 -20   3   2    72.74    17.26    33.76 <
       523    2  18  -3   2   167.72    86.69    34.14 <
       523    1 -19   3   2   167.72    86.69    34.14 <
       524    2  17  -3   2    77.61    56.00    32.99 <
       524    1 -18   3   2    77.61    56.00    32.99 <
       525    2  16  -3   2   261.64   254.70    20.33 o
       525    1 -17   3   2   261.64   254.70    20.33 o
       526    2  15  -3   2   569.43   563.11    26.85 o
       526    1 -16   3   2   569.43   563.11    26.85 o
       527    2  14  -3   2   767.05   757.20    27.62 o
       527    1 -15   3   2   767.05   757.20    27.62 o
       528    2  13  -3   2   989.96   917.16    22.63 o
       528    1 -14   3   2   989.96   917.16    22.63 o
       529    2  12  -3   2   242.21   367.09    13.43 o
       529    1 -13   3   2   242.21   367.09    13.43 o
       530    2  11  -3   2   118.08   309.17    11.12 o
       530    1 -12   3   2   118.08   309.17    11.12 o
       531    2  10  -3   2  1733.11  1873.06    27.62 o
       531    1 -11   3   2  1733.11  1873.06    27.62 o
       532    2   9  -3   2   439.29   408.14    12.27 o
       532    1 -10   3   2   439.29   408.14    12.27 o
       533    2   8  -3   2   675.01   663.61    14.58 o
       533    1  -9   3   2   675.01   663.61    14.58 o
       534    2   7  -3   2    59.17    61.76     4.99 o
       534    1  -8   3   2    59.17    61.76     4.99 o
       535    2   6  -3   2  2416.11  2425.43    24.17 o
       535    1  -7   3   2  2416.11  2425.43    24.17 o
       536    2   5  -3   2  6722.13  6538.64    50.25 o
       536    1  -6   3   2  6722.13  6538.64    50.25 o
       537    2   4  -3   2  1094.74  1127.36    13.04 o
       537    1  -5   3   2  1094.74  1127.36    13.04 o
       538    2   3  -3   2   290.09   535.87    10.36 o
       538    1  -4   3   2   290.09   535.87    10.36 o
       539    2   1  -3   2   342.84   527.82     9.59 o
       539    1  -2   3   2   342.84   527.82     9.59 o
       540    2   0  -3   2   157.48   185.27     6.52 o
       540    1  -1   3   2   157.48   185.27     6.52 o
       541    2  -1  -3   2   447.83   475.27     9.21 o
       541    1   0   3   2   447.83   475.27     9.21 o
       542    2  -2  -3   2  2293.29  2440.39    23.02 o
       542    1   1   3   2  2293.29  2440.39    23.02 o
       543    2  -3  -3   2  4357.97  4370.60    39.13 o
       543    1   2   3   2  4357.97  4370.60    39.13 o
       544    2  -4  -3   2  3012.61  2935.98    28.77 o
       544    1   3   3   2  3012.61  2935.98    28.77 o
       545    2  -5  -3   2  1396.19  1373.63    16.49 o
       545    1   4   3   2  1396.19  1373.63    16.49 o
       546    2  -6  -3   2   445.72  1007.69    27.23 o
       546    1   5   3   2   445.72  1007.69    27.23 o
       547    2  -7  -3   2   306.20   460.69    12.66 o
       547    1   6   3   2   306.20   460.69    12.66 o
       548    2  -8  -3   2    62.28    57.15     6.90 o
       548    1   7   3   2    62.28    57.15     6.90 o
       549    2  -9  -3   2    50.76   108.17     9.21 o
       549    1   8   3   2    50.76   108.17     9.21 o
       550    2 -10  -3   2   345.06   401.62    17.65 o
       550    1   9   3   2   345.06   401.62    17.65 o
       551    2 -11  -3   2  2026.38  1961.67    31.45 o
       551    1  10   3   2  2026.38  1961.67    31.45 o
       552    2 -12  -3   2  2417.28  2197.19    34.52 o
       552    1  11   3   2  2417.28  2197.19    34.52 o
       553    2 -13  -3   2  1550.61  1605.70    29.92 o
       553    1  12   3   2  1550.61  1605.70    29.92 o
       554    2 -14  -3   2   768.66   815.51    21.86 o
       554    1  13   3   2   768.66   815.51    21.86 o
       555    2 -15  -3   2   154.47   208.67    17.26 o
       555    1  14   3   2   154.47   208.67    17.26 o
       556    2 -16  -3   2    88.37   107.40    16.11 o
       556    1  15   3   2    88.37   107.40    16.11 o
       557    2 -17  -3   2    50.06    64.06    16.49 o
       557    1  16   3   2    50.06    64.06    16.49 o
       558    2 -18  -3   2     3.76    15.73    15.34 <
       558    1  17   3   2     3.76    15.73    15.34 <
       559    2 -19  -3   2    10.74    -1.15    19.95 <
       559    1  18   3   2    10.74    -1.15    19.95 <
       560    2 -20  -3   2   223.59   250.10    28.77 o
       560    1  19   3   2   223.59   250.10    28.77 o
       561    2 -21  -3   2   235.85   211.36    40.28 o
       561    1  20   3   2   235.85   211.36    40.28 o
       562    2  18  -4   2   246.20   276.95    55.62 o
       562    1 -19   4   2   246.20   276.95    55.62 o
       563    2  17  -4   2   112.08   187.19    28.77 o
       563    1 -18   4   2   112.08   187.19    28.77 o
       564    2  16  -4   2    41.10    28.39    21.86 <
       564    1 -17   4   2    41.10    28.39    21.86 <
       565    2  15  -4   2    70.99   112.78    18.03 o
       565    1 -16   4   2    70.99   112.78    18.03 o
       566    2  14  -4   2   144.21   127.35    17.65 o
       566    1 -15   4   2   144.21   127.35    17.65 o
       567    2  13  -4   2   118.72   152.28    17.26 o
       567    1 -14   4   2   118.72   152.28    17.26 o
       568    2  12  -4   2  1473.22  1414.29    37.98 o
       568    1 -13   4   2  1473.22  1414.29    37.98 o
       569    2  11  -4   2  1571.46  1484.87    37.98 o
       569    1 -12   4   2  1571.46  1484.87    37.98 o
       570    2  10  -4   2   512.72   499.82    23.02 o
       570    1 -11   4   2   512.72   499.82    23.02 o
       571    2   9  -4   2  2843.00  2566.59    49.87 o
       571    1 -10   4   2  2843.00  2566.59    49.87 o
       572    2   8  -4   2   406.80   393.95    13.43 o
       572    1  -9   4   2   406.80   393.95    13.43 o
       573    2   7  -4   2    27.17    50.25     6.52 o
       573    1  -8   4   2    27.17    50.25     6.52 o
       574    2   6  -4   2   451.14   436.52    12.27 o
       574    1  -7   4   2   451.14   436.52    12.27 o
       575    2   5  -4   2    53.08   118.91     7.29 o
       575    1  -6   4   2    53.08   118.91     7.29 o
       576    2   4  -4   2   314.43   390.49    11.12 o
       576    1  -5   4   2   314.43   390.49    11.12 o
       577    2   3  -4   2  1251.43  1180.68    17.65 o
       577    1  -4   4   2  1251.43  1180.68    17.65 o
       578    2   2  -4   2  1588.06  1495.61    18.41 o
       578    1  -3   4   2  1588.06  1495.61    18.41 o
       579    2   1  -4   2  2423.31  2412.38    25.32 o
       579    1  -2   4   2  2423.31  2412.38    25.32 o
       580    2   0  -4   2  1114.18  1090.92    16.11 o
       580    1  -1   4   2  1114.18  1090.92    16.11 o
       581    2  -1  -4   2   307.57   330.27     9.97 o
       581    1   0   4   2   307.57   330.27     9.97 o
       582    2  -2  -4   2   566.38   706.57    13.43 o
       582    1   1   4   2   566.38   706.57    13.43 o
       583    2  -3  -4   2   192.23   317.23     9.97 o
       583    1   2   4   2   192.23   317.23     9.97 o
       584    2  -4  -4   2    56.98   135.02     8.06 o
       584    1   3   4   2    56.98   135.02     8.06 o
       585    2  -5  -4   2   826.83   843.13    14.58 o
       585    1   4   4   2   826.83   843.13    14.58 o
       586    2  -6  -4   2   676.85   688.92    14.19 o
       586    1   5   4   2   676.85   688.92    14.19 o
       587    2  -7  -4   2   133.97   174.15     8.44 o
       587    1   6   4   2   133.97   174.15     8.44 o
       588    2  -8  -4   2   297.37   314.54    10.74 o
       588    1   7   4   2   297.37   314.54    10.74 o
       589    2  -9  -4   2    21.45    52.94     8.06 o
       589    1   8   4   2    21.45    52.94     8.06 o
       590    2 -10  -4   2   165.54   395.10    20.33 o
       590    1   9   4   2   165.54   395.10    20.33 o
       591    2 -11  -4   2    44.77    80.94     9.97 o
       591    1  10   4   2    44.77    80.94     9.97 o
       592    2 -12  -4   2    61.50   162.26    12.27 o
       592    1  11   4   2    61.50   162.26    12.27 o
       593    2 -13  -4   2   236.37   323.75    16.11 o
       593    1  12   4   2   236.37   323.75    16.11 o
       594    2 -14  -4   2   194.14   194.48    18.80 o
       594    1  13   4   2   194.14   194.48    18.80 o
       595    2 -15  -4   2   179.12   164.56    17.65 o
       595    1  14   4   2   179.12   164.56    17.65 o
       596    2 -16  -4   2   258.34   247.03    21.48 o
       596    1  15   4   2   258.34   247.03    21.48 o
       597    2 -17  -4   2     8.45    10.74    14.19 <
       597    1  16   4   2     8.45    10.74    14.19 <
       598    2 -18  -4   2   154.00   161.49    21.86 o
       598    1  17   4   2   154.00   161.49    21.86 o
       599    2 -19  -4   2    20.85    -6.90    22.25 <
       599    1  18   4   2    20.85    -6.90    22.25 <
       600    2  16  -5   2     9.35    52.17    23.40 <
       600    1 -17   5   2     9.35    52.17    23.40 <
       601    2  15  -5   2    31.70    72.88    24.17 o
       601    1 -16   5   2    31.70    72.88    24.17 o
       602    2  14  -5   2    16.96    21.86    16.49 <
       602    1 -15   5   2    16.96    21.86    16.49 <
       603    2  13  -5   2    10.61    33.76    15.34 <
       603    1 -14   5   2    10.61    33.76    15.34 <
       604    2  12  -5   2   491.51   493.68    28.00 o
       604    1 -13   5   2   491.51   493.68    28.00 o
       605    2  11  -5   2   127.81   149.22    18.41 o
       605    1 -12   5   2   127.81   149.22    18.41 o
       606    2  10  -5   2    56.22    72.50    15.34 o
       606    1 -11   5   2    56.22    72.50    15.34 o
       607    2   9  -5   2   383.99   386.27    22.25 o
       607    1 -10   5   2   383.99   386.27    22.25 o
       608    2   8  -5   2   370.62   394.71    23.02 o
       608    1  -9   5   2   370.62   394.71    23.02 o
       609    2   7  -5   2   265.93   242.43    22.25 o
       609    1  -8   5   2   265.93   242.43    22.25 o
       610    2   6  -5   2    46.43   113.16    11.51 o
       610    1  -7   5   2    46.43   113.16    11.51 o
       611    2   5  -5   2   613.89   606.45    19.56 o
       611    1  -6   5   2   613.89   606.45    19.56 o
       612    2   4  -5   2  1110.49  1053.72    23.78 o
       612    1  -5   5   2  1110.49  1053.72    23.78 o
       613    2   3  -5   2    91.09   158.80    10.74 o
       613    1  -4   5   2    91.09   158.80    10.74 o
       614    2   2  -5   2   360.52   445.35    15.73 o
       614    1  -3   5   2   360.52   445.35    15.73 o
       615    2   1  -5   2   855.58   985.05    21.10 o
       615    1  -2   5   2   855.58   985.05    21.10 o
       616    2   0  -5   2   236.21   287.69    13.04 o
       616    1  -1   5   2   236.21   287.69    13.04 o
       617    2  -1  -5   2   203.05   235.14    11.89 o
       617    1   0   5   2   203.05   235.14    11.89 o
       618    2  -2  -5   2   752.43   810.14    18.41 o
       618    1   1   5   2   752.43   810.14    18.41 o
       619    2  -3  -5   2   964.53   852.72    21.10 o
       619    1   2   5   2   964.53   852.72    21.10 o
       620    2  -4  -5   2   917.63   861.16    18.80 o
       620    1   3   5   2   917.63   861.16    18.80 o
       621    2  -5  -5   2  1075.47  1117.39    21.10 o
       621    1   4   5   2  1075.47  1117.39    21.10 o
       622    2  -6  -5   2   971.60   928.28    19.56 o
       622    1   5   5   2   971.60   928.28    19.56 o
       623    2  -7  -5   2   772.35   749.53    20.71 o
       623    1   6   5   2   772.35   749.53    20.71 o
       624    2  -8  -5   2   223.44   235.52    16.11 o
       624    1   7   5   2   223.44   235.52    16.11 o
       625    2  -9  -5   2   292.20   301.50    18.03 o
       625    1   8   5   2   292.20   301.50    18.03 o
       626    2 -10  -5   2   449.16   490.99    24.93 o
       626    1   9   5   2   449.16   490.99    24.93 o
       627    2 -11  -5   2    86.84    99.35    16.11 o
       627    1  10   5   2    86.84    99.35    16.11 o
       628    2 -12  -5   2   270.09   296.51    23.02 o
       628    1  11   5   2   270.09   296.51    23.02 o
       629    2 -13  -5   2   579.41   612.97    29.54 o
       629    1  12   5   2   579.41   612.97    29.54 o
       630    2 -14  -5   2   253.15   248.18    22.63 o
       630    1  13   5   2   253.15   248.18    22.63 o
       631    2 -15  -5   2   179.10   191.41    21.48 o
       631    1  14   5   2   179.10   191.41    21.48 o
       632    2 -16  -5   2   299.81   300.35    24.93 o
       632    1  15   5   2   299.81   300.35    24.93 o
       633    2 -17  -5   2   236.77   208.29    24.17 o
       633    1  16   5   2   236.77   208.29    24.17 o
       634    2  12  -6   2   406.78   392.79    46.41 o
       634    1 -13   6   2   406.78   392.79    46.41 o
       635    2  11  -6   2   487.52   479.48    50.25 o
       635    1 -12   6   2   487.52   479.48    50.25 o
       636    2  10  -6   2   202.23   177.22    36.06 o
       636    1 -11   6   2   202.23   177.22    36.06 o
       637    2   9  -6   2     2.28    -9.21    19.18 <
       637    1 -10   6   2     2.28    -9.21    19.18 <
       638    2   8  -6   2     4.57    -5.75    18.41 <
       638    1  -9   6   2     4.57    -5.75    18.41 <
       639    2   7  -6   2     6.37    -5.37    17.26 <
       639    1  -8   6   2     6.37    -5.37    17.26 <
       640    2   6  -6   2    16.58    40.66    18.41 <
       640    1  -7   6   2    16.58    40.66    18.41 <
       641    2   5  -6   2   131.84   174.53    23.02 o
       641    1  -6   6   2   131.84   174.53    23.02 o
       642    2   4  -6   2   659.85   650.57    28.39 o
       642    1  -5   6   2   659.85   650.57    28.39 o
       643    2   3  -6   2   944.91   893.38    37.21 o
       643    1  -4   6   2   944.91   893.38    37.21 o
       644    2   2  -6   2   513.72   500.20    31.84 o
       644    1  -3   6   2   513.72   500.20    31.84 o
       645    2   1  -6   2   126.18   112.01    19.18 o
       645    1  -2   6   2   126.18   112.01    19.18 o
       646    2   0  -6   2     2.83    22.63    11.12 <
       646    1  -1   6   2     2.83    22.63    11.12 <
       647    2  -1  -6   2    43.62    47.18    12.27 o
       647    1   0   6   2    43.62    47.18    12.27 o
       648    2  -2  -6   2    88.82    80.17    13.43 o
       648    1   1   6   2    88.82    80.17    13.43 o
       649    2  -3  -6   2    43.04    88.61    13.81 o
       649    1   2   6   2    43.04    88.61    13.81 o
       650    2  -4  -6   2   148.47   270.05    19.95 o
       650    1   3   6   2   148.47   270.05    19.95 o
       651    2  -5  -6   2   390.24   410.05    23.78 o
       651    1   4   6   2   390.24   410.05    23.78 o
       652    2  -6  -6   2   548.50   542.39    32.99 o
       652    1   5   6   2   548.50   542.39    32.99 o
       653    2  -7  -6   2   337.68   332.95    27.23 o
       653    1   6   6   2   337.68   332.95    27.23 o
       654    2  -8  -6   2    18.33     4.22    15.34 <
       654    1   7   6   2    18.33     4.22    15.34 <
       655    2  -9  -6   2     1.20    14.96    16.88 <
       655    1   8   6   2     1.20    14.96    16.88 <
       656    2 -10  -6   2    14.65     0.00    16.49 <
       656    1   9   6   2    14.65     0.00    16.49 <
       657    2 -11  -6   2    89.21   114.31    23.02 o
       657    1  10   6   2    89.21   114.31    23.02 o
       658    2 -12  -6   2    34.42    95.13    23.40 o
       658    1  11   6   2    34.42    95.13    23.40 o
       659    2 -13  -6   2    47.42    93.21    22.63 o
       659    1  12   6   2    47.42    93.21    22.63 o
       660    2   7  -7   2   235.20   348.68    51.78 o
       660    1  -8   7   2   235.20   348.68    51.78 o
       661    2   6  -7   2    82.00   156.12    41.43 o
       661    1  -7   7   2    82.00   156.12    41.43 o
       662    2   5  -7   2    31.53    92.44    35.29 <
       662    1  -6   7   2    31.53    92.44    35.29 <
       663    2   4  -7   2    38.93    73.65    34.91 <
       663    1  -5   7   2    38.93    73.65    34.91 <
       664    2   3  -7   2    71.82    49.10    30.30 <
       664    1  -4   7   2    71.82    49.10    30.30 <
       665    2   2  -7   2   562.40   513.62    35.29 o
       665    1  -3   7   2   562.40   513.62    35.29 o
       666    2   1  -7   2  1083.94  1097.06    45.65 o
       666    1  -2   7   2  1083.94  1097.06    45.65 o
       667    2   0  -7   2   727.67   774.08    40.66 o
       667    1  -1   7   2   727.67   774.08    40.66 o
       668    2  -1  -7   2   660.39   761.04    39.51 o
       668    1   0   7   2   660.39   761.04    39.51 o
       669    2  -2  -7   2   432.87   528.58    35.67 o
       669    1   1   7   2   432.87   528.58    35.67 o
       670    2  -3  -7   2   158.80   196.01    24.93 o
       670    1   2   7   2   158.80   196.01    24.93 o
       671    2  -4  -7   2     8.00    12.27    26.47 <
       671    1   3   7   2     8.00    12.27    26.47 <
       672    2  -5  -7   2     6.88    28.77    30.30 <
       672    1   4   7   2     6.88    28.77    30.30 <
       673    2  -6  -7   2   364.78   381.67    48.72 o
       673    1   5   7   2   364.78   381.67    48.72 o
       674    2  -7  -7   2   661.34   669.36    63.68 o
       674    1   6   7   2   661.34   669.36    63.68 o
       675    2  -8  -7   2   576.25   560.80    41.04 o
       675    1   7   7   2   576.25   560.80    41.04 o
       676    1 -22   1   3   201.59   178.37    18.80 o
       677    1 -21   1   3    65.46    57.15    15.34 o
       678    1 -20   1   3   196.94   162.26    16.88 o
       679    1 -19   1   3    19.67    20.33    12.66 <
       680    1 -18   1   3    55.68    71.35    13.81 o
       681    1 -17   1   3   134.48   131.57    13.81 o
       682    1 -16   1   3  1436.01  1338.72    26.47 o
       683    1 -15   1   3  1149.89  1117.39    21.10 o
       684    1 -14   1   3  1612.74  1581.92    24.55 o
       685    1 -13   1   3  4139.63  4054.52    45.26 o
       686    1 -12   1   3   930.21   928.28    15.73 o
       687    1 -11   1   3   139.76   141.93     7.67 o
       688    1 -10   1   3   832.67   828.55    12.66 o
       689    1  -9   1   3   251.91   242.43     7.29 o
       690    1  -8   1   3  2421.57  2451.13    21.86 o
       691    1  -7   1   3  8454.30  8499.92    65.59 o
       692    1  -6   1   3 12812.40 12622.00    90.53 o
       693    1  -5   1   3 17713.20 18458.20   158.04 o
       694    1  -4   1   3 10877.80 11434.40    99.35 o
       695    1  -3   1   3  5260.49  5721.21    43.73 o
       696    1  -2   1   3   367.59   331.42     4.99 o
       697    1  -1   1   3   723.79   785.20     7.67 o
       698    1   0   1   3  1221.56  1287.32    15.73 o
       699    1   1   1   3  2321.55  2460.33    24.17 o
       700    1   2   1   3 19733.50 21073.90   169.93 o
       701    1   3   1   3 21729.80 23200.20   190.64 o
       702    1   4   1   3 12809.80 10992.10   124.67 o
       703    1   5   1   3  9793.23 10034.30    90.91 o
       704    1   6   1   3  5126.04  5145.83    41.81 o
       705    1   7   1   3   964.46   958.20    13.43 o
       706    1   8   1   3   188.99   186.81     5.37 o
       707    1   9   1   3  1380.71  1311.10    13.43 o
       708    1  10   1   3  2404.11  2268.92    19.95 o
       709    1  11   1   3  3414.94  3306.53    28.77 o
       710    1  12   1   3  3401.56  3342.97    29.15 o
       711    1  13   1   3  2278.29  2210.62    22.25 o
       712    1  14   1   3  1889.74  1837.77    21.86 o
       713    1  15   1   3   285.88   315.69    14.58 o
       714    1  16   1   3    19.56    23.02     9.97 <
       715    1  17   1   3   197.94   176.45    17.26 o
       716    1  18   1   3   223.20   220.56    19.95 o
       717    1  19   1   3   285.61   297.28    27.23 o
       718    1  20   1   3   511.47   472.20    34.14 o
       719    1  21   1   3   513.83   483.70    34.14 o
       720    1 -22   2   3    13.58   -81.32    27.62 <
       721    1 -21   2   3    12.27   -10.36    16.11 <
       722    1 -20   2   3   143.40   104.72    19.18 o
       723    1 -19   2   3    20.14     8.82    15.73 <
       724    1 -18   2   3    63.45    48.72    15.34 o
       725    1 -17   2   3   213.28   221.71    14.96 o
       726    1 -16   2   3   467.86   463.76    15.73 o
       727    1 -15   2   3   548.45   489.46    15.34 o
       728    1 -14   2   3    18.95    26.85     6.90 o
       729    1 -13   2   3    71.97    67.51     9.97 o
       730    1 -12   2   3     4.32     1.92     6.52 <
       731    1 -11   2   3   517.98   484.86    14.19 o
       732    1 -10   2   3   237.32   258.92    10.74 o
       733    1  -9   2   3    55.68    49.48     6.52 o
       734    1  -8   2   3   135.94   123.13     7.67 o
       735    1  -7   2   3  2562.50  2451.13    26.47 o
       736    1  -6   2   3   117.17   196.40     6.90 o
       737    1  -5   2   3   126.68   123.51     4.22 o
       738    1  -4   2   3   244.22   303.80     5.75 o
       739    1  -3   2   3   815.56   879.95     9.59 o
       740    1  -2   2   3   169.93   197.55     5.37 o
       741    1  -1   2   3    26.61    19.95     3.07 o
       742    1   0   2   3   285.19   256.62     6.90 o
       743    1   1   2   3  1052.48  1029.93    20.71 o
       744    1   2   2   3   136.67   108.94     8.44 o
       745    1   3   2   3    13.25     1.92     4.99 <
       746    1   4   2   3     9.62     5.37     5.75 <
       747    1   5   2   3   154.38   173.38     9.21 o
       748    1   6   2   3   107.68   135.02     8.44 o
       749    1   7   2   3    15.96     2.69     4.22 <
       750    1   8   2   3    35.81    37.59     5.37 o
       751    1   9   2   3   453.69   403.53    12.27 o
       752    1  10   2   3   740.59   659.39    16.11 o
       753    1  11   2   3   485.66   459.92    17.26 o
       754    1  12   2   3     5.03     3.07     8.06 <
       755    1  13   2   3     0.16     6.52     9.21 <
       756    1  14   2   3   865.15   871.13    22.25 o
       757    1  15   2   3   171.70   180.67    15.34 o
       758    1  16   2   3    15.80    18.80    15.73 <
       759    1  17   2   3    48.31    53.32    16.49 o
       760    1  18   2   3    39.71    51.02    17.65 <
       761    1  19   2   3    26.61    27.62    16.49 <
       762    1  20   2   3     0.79     1.92    22.25 <
       763    1 -21   3   3    74.19    96.66    41.04 <
       764    1 -20   3   3   108.70    47.56    38.74 <
       765    1 -19   3   3   237.01   266.21    49.48 o
       766    1 -18   3   3   231.28   278.10    47.18 o
       767    1 -17   3   3   289.69   305.72    22.63 o
       768    1 -16   3   3   287.07   239.74    12.27 o
       769    1 -15   3   3   107.20   129.27    10.36 o
       770    1 -14   3   3   195.39   182.20    11.12 o
       771    1 -13   3   3   398.95   359.80    16.11 o
       772    1 -12   3   3  1573.69  1491.39    28.77 o
       773    1 -11   3   3   309.15   302.65    11.51 o
       774    1 -10   3   3   600.57   555.82    13.81 o
       775    1  -9   3   3  5369.72  5150.05    56.77 o
       776    1  -8   3   3   316.03   315.31     8.44 o
       777    1  -7   3   3   315.73   267.36     7.67 o
       778    1  -6   3   3  2593.92  2545.87    23.02 o
       779    1  -5   3   3  1114.44  1012.29    12.66 o
       780    1  -4   3   3  2724.03  2671.69    23.78 o
       781    1  -3   3   3  1605.15  1575.01    17.26 o
       782    1  -2   3   3  5083.89  5221.01    42.19 o
       783    1  -1   3   3  7894.32  8217.99    59.07 o
       784    1   0   3   3  2392.53  2329.91    22.63 o
       785    1   1   3   3  3335.00  2663.25    25.70 o
       786    1   2   3   3  3062.01  2861.18    30.30 o
       787    1   3   3   3  1061.46  1078.65    14.19 o
       788    1   4   3   3   977.54   951.30    14.96 o
       789    1   5   3   3  2279.61  2236.70    24.93 o
       790    1   6   3   3  1238.40  1266.22    19.95 o
       791    1   7   3   3  1374.96  1385.52    21.10 o
       792    1   8   3   3  4037.50  3901.86    41.43 o
       793    1   9   3   3  1111.48  1016.12    24.55 o
       794    1  10   3   3   775.92   746.08    22.63 o
       795    1  11   3   3  1093.28  1051.41    22.63 o
       796    1  12   3   3   470.11   451.87    16.49 o
       797    1  13   3   3   612.87   591.88    19.56 o
       798    1  14   3   3   177.21   167.63    13.81 o
       799    1  15   3   3   461.89   433.07    23.40 o
       800    1  16   3   3   909.58   807.84    29.92 o
       801    1  17   3   3   284.84   273.11    26.85 o
       802    1  18   3   3   165.87   146.53    24.93 o
       803    1  19   3   3   245.63   192.56    27.62 o
       804    1 -19   4   3    19.90    24.55    38.74 <
       805    1 -18   4   3   310.72   383.20    37.21 o
       806    1 -17   4   3   341.84   378.22    35.29 o
       807    1 -16   4   3   395.09   433.84    27.62 o
       808    1 -15   4   3    76.59    90.91    16.49 o
       809    1 -14   4   3   204.36   166.09    17.65 o
       810    1 -13   4   3    69.89    71.35    14.19 o
       811    1 -12   4   3   663.82   594.56    25.70 o
       812    1 -11   4   3    21.94    24.55     8.44 <
       813    1 -10   4   3   471.09   427.70    16.88 o
       814    1  -9   4   3   177.63   184.51    12.27 o
       815    1  -8   4   3   533.14   508.64    14.19 o
       816    1  -7   4   3   800.16   755.28    13.81 o
       817    1  -6   4   3  1617.33  1529.36    19.56 o
       818    1  -5   4   3     2.31     8.82     5.37 <
       819    1  -4   4   3   205.31   205.22     8.44 o
       820    1  -3   4   3    19.47    26.85     5.75 o
       821    1  -2   4   3     4.99     6.14     5.37 <
       822    1  -1   4   3    33.98    29.92     6.90 o
       823    1   0   4   3    88.19    96.66     8.06 o
       824    1   1   4   3   580.38   530.50    13.04 o
       825    1   2   4   3   280.43   292.68    10.36 o
       826    1   3   4   3     0.08     1.92     4.60 <
       827    1   4   4   3     8.38     0.77     5.37 <
       828    1   5   4   3   723.57   637.52    13.81 o
       829    1   6   4   3   113.27   114.31     7.67 o
       830    1   7   4   3     0.92     2.30     5.37 <
       831    1   8   4   3    12.13    12.66     7.29 <
       832    1   9   4   3   163.12   176.07    11.89 o
       833    1  10   4   3   223.35   228.24    13.43 o
       834    1  11   4   3   106.87   127.74    11.51 o
       835    1  12   4   3    11.31    -1.53     8.44 <
       836    1  13   4   3   157.09   196.01    18.80 o
       837    1  14   4   3   216.78   176.83    19.18 o
       838    1  15   4   3   137.77   125.05    17.65 o
       839    1  16   4   3    27.25    24.17    16.88 <
       840    1  17   4   3    28.43     7.67    16.88 <
       841    1  18   4   3     7.59   -15.34    22.25 <
       842    1 -17   5   3    61.24    70.20    24.17 <
       843    1 -16   5   3    15.67    31.45    20.33 <
       844    1 -15   5   3   164.76   104.72    22.63 o
       845    1 -14   5   3   117.57   101.65    18.03 o
       846    1 -13   5   3    16.54    40.28    14.96 <
       847    1 -12   5   3   397.68   359.80    24.55 o
       848    1 -11   5   3   397.81   429.62    24.93 o
       849    1 -10   5   3   967.68   878.80    31.07 o
       850    1  -9   5   3   877.06   924.83    31.84 o
       851    1  -8   5   3   914.82   858.85    28.00 o
       852    1  -7   5   3   340.62   327.58    16.11 o
       853    1  -6   5   3     5.47     0.38     8.06 <
       854    1  -5   5   3    38.25    45.65     8.44 o
       855    1  -4   5   3    20.53    39.13     8.06 o
       856    1  -3   5   3   568.48   553.13    18.03 o
       857    1  -2   5   3  1278.23  1214.82    22.63 o
       858    1  -1   5   3  1220.39  1153.83    21.86 o
       859    1   0   5   3   993.39   981.60    20.71 o
       860    1   1   5   3   599.04   592.64    16.49 o
       861    1   2   5   3   629.57   562.72    15.73 o
       862    1   3   5   3     3.79     1.92     6.90 <
       863    1   4   5   3    39.22    50.25     8.06 o
       864    1   5   5   3   924.74   826.63    18.41 o
       865    1   6   5   3   725.58   673.20    17.65 o
       866    1   7   5   3  1228.49  1163.42    28.39 o
       867    1   8   5   3   949.54   864.22    25.32 o
       868    1   9   5   3   624.16   601.47    21.48 o
       869    1  10   5   3   328.80   317.23    22.25 o
       870    1  11   5   3     1.75    13.43    14.58 <
       871    1  12   5   3     1.53    15.73    14.96 <
       872    1  13   5   3    76.48    52.17    16.49 o
       873    1  14   5   3   129.63   117.38    19.18 o
       874    1  15   5   3   242.45   237.06    23.40 o
       875    1 -13   6   3   414.38   482.17    52.17 o
       876    1 -12   6   3   512.30   542.01    50.63 o
       877    1 -11   6   3   308.89   329.12    41.43 o
       878    1 -10   6   3   137.54   126.20    32.22 o
       879    1  -9   6   3    59.93    59.46    27.23 <
       880    1  -8   6   3    52.64    73.27    28.00 <
       881    1  -7   6   3     3.57    12.27    24.93 <
       882    1  -6   6   3    15.58    16.88    24.93 <
       883    1  -5   6   3    66.17    60.61    18.80 o
       884    1  -4   6   3   286.55   289.61    21.10 o
       885    1  -3   6   3   467.49   449.57    22.63 o
       886    1  -2   6   3   360.83   334.11    16.88 o
       887    1  -1   6   3     0.38    -2.30     8.82 <
       888    1   0   6   3     3.58    24.17     9.59 <
       889    1   1   6   3     0.26     8.06     8.82 <
       890    1   2   6   3    84.53    83.24    14.19 o
       891    1   3   6   3     0.08    16.49    11.89 <
       892    1   4   6   3    73.66    63.68    13.81 o
       893    1   5   6   3   331.39   354.43    28.77 o
       894    1   6   6   3    59.20    57.54    18.80 o
       895    1   7   6   3     1.29     0.00    16.88 <
       896    1   8   6   3     8.06    14.96    16.88 <
       897    1   9   6   3   121.76   130.42    23.78 o
       898    1  10   6   3   276.57   254.70    28.77 o
       899    1  11   6   3    96.76   123.90    24.55 o
       900    1  12   6   3    31.52    53.32    21.48 <
       901    1  -8   7   3    77.45    72.50    36.06 <
       902    1  -7   7   3     8.82    62.91    34.14 <
       903    1  -6   7   3    43.31    51.78    31.84 <
       904    1  -5   7   3     6.46    -2.30    29.15 <
       905    1  -4   7   3    22.65    37.21    30.69 <
       906    1  -3   7   3    88.31    79.02    20.33 o
       907    1  -2   7   3   421.46   416.58    32.99 o
       908    1  -1   7   3   593.26   581.90    37.21 o
       909    1   0   7   3   250.68   288.07    28.77 o
       910    1   1   7   3   152.98   161.11    24.55 o
       911    1   2   7   3     3.38    32.22    18.80 <
       912    1   3   7   3    35.37    80.55    32.22 <
       913    1   4   7   3     8.05    11.51    17.26 <
       914    1   5   7   3    10.49    31.45    18.41 <
       915    1   6   7   3    77.67    78.64    22.25 o
       916    2  21   0   4    85.32    99.35    29.92 o
       916    1 -23   0   4    85.32    99.35    29.92 o
       917    2  20   0   4    11.10   -18.80    23.78 <
       917    1 -22   0   4    11.10   -18.80    23.78 <
       918    2  19   0   4    38.56     5.75    22.25 <
       918    1 -21   0   4    38.56     5.75    22.25 <
       919    2  18   0   4    11.47    16.11    22.25 <
       919    1 -20   0   4    11.47    16.11    22.25 <
       920    2  17   0   4    37.47    47.56    21.48 <
       920    1 -19   0   4    37.47    47.56    21.48 <
       921    2  16   0   4   156.48   151.90    24.55 o
       921    1 -18   0   4   156.48   151.90    24.55 o
       922    2  15   0   4  1331.64  1370.18    49.10 o
       922    1 -17   0   4  1331.64  1370.18    49.10 o
       923    2  14   0   4   955.56  1095.53    44.50 o
       923    1 -16   0   4   955.56  1095.53    44.50 o
       924    2  13   0   4    22.17     7.67    16.49 <
       924    1 -15   0   4    22.17     7.67    16.49 <
       925    2  12   0   4   853.77   789.81    22.63 o
       925    1 -14   0   4   853.77   789.81    22.63 o
       926    2  11   0   4     8.10     8.06     7.29 <
       926    1 -13   0   4     8.10     8.06     7.29 <
       927    2  10   0   4    11.96    19.56     8.06 <
       927    1 -12   0   4    11.96    19.56     8.06 <
       928    2   9   0   4   238.38   281.55     9.59 o
       928    1 -11   0   4   238.38   281.55     9.59 o
       929    2   8   0   4   173.67   207.90     8.44 o
       929    1 -10   0   4   173.67   207.90     8.44 o
       930    2   7   0   4  3122.80  3924.10    54.09 o
       930    1  -9   0   4  3122.80  3924.10    54.09 o
       931    2   6   0   4  1492.18  1649.43    34.14 o
       931    1  -8   0   4  1492.18  1649.43    34.14 o
       932    2   3   0   4  2344.33  2606.86    35.29 o
       932    1  -5   0   4  2344.33  2606.86    35.29 o
       933    2   2   0   4  1250.86  1165.34    16.49 o
       933    1  -4   0   4  1250.86  1165.34    16.49 o
       934    2   1   0   4 14541.20 16258.80   167.63 o
       934    1  -3   0   4 14541.20 16258.80   167.63 o
       935    2   0   0   4  2762.33  3071.77    33.76 o
       935    1  -2   0   4  2762.33  3071.77    33.76 o
       936    2  -1   0   4   231.97   289.99     7.29 o
       936    1  -1   0   4   231.97   289.99     7.29 o
       937    2  -2   0   4  3118.17  3164.22    29.54 o
       937    1   0   0   4  3118.17  3164.22    29.54 o
       938    2  -3   0   4  2398.79  2117.02    24.93 o
       938    1   1   0   4  2398.79  2117.02    24.93 o
       939    2  -4   0   4    72.90    -0.38     5.37 <
       939    1   2   0   4    72.90    -0.38     5.37 <
       940    2  -5   0   4   139.58    67.89     6.90 o
       940    1   3   0   4   139.58    67.89     6.90 o
       941    2  -6   0   4  2308.11  2280.05    24.55 o
       941    1   4   0   4  2308.11  2280.05    24.55 o
       942    2  -7   0   4  1673.53  1699.29    20.33 o
       942    1   5   0   4  1673.53  1699.29    20.33 o
       943    2  -8   0   4   173.68   138.86     9.59 o
       943    1   6   0   4   173.68   138.86     9.59 o
       944    2  -9   0   4  8457.91  8898.85    79.79 o
       944    1   7   0   4  8457.91  8898.85    79.79 o
       945    2 -10   0   4   304.82   311.86     9.59 o
       945    1   8   0   4   304.82   311.86     9.59 o
       946    2 -11   0   4   402.51   446.88    11.51 o
       946    1   9   0   4   402.51   446.88    11.51 o
       947    2 -12   0   4   179.28   179.90     8.82 o
       947    1  10   0   4   179.28   179.90     8.82 o
       948    2 -13   0   4    37.99    35.29     6.14 o
       948    1  11   0   4    37.99    35.29     6.14 o
       949    2 -14   0   4   258.20   305.34    11.89 o
       949    1  12   0   4   258.20   305.34    11.89 o
       950    2 -15   0   4   477.36   510.17    17.65 o
       950    1  13   0   4   477.36   510.17    17.65 o
       951    2 -16   0   4  2789.01  2768.35    42.58 o
       951    1  14   0   4  2789.01  2768.35    42.58 o
       952    2 -17   0   4  2397.03  2337.97    38.74 o
       952    1  15   0   4  2397.03  2337.97    38.74 o
       953    2 -18   0   4  1035.19  1065.61    25.70 o
       953    1  16   0   4  1035.19  1065.61    25.70 o
       954    2 -19   0   4   540.32   539.71    24.55 o
       954    1  17   0   4   540.32   539.71    24.55 o
       955    2 -20   0   4    25.26    40.28    14.58 <
       955    1  18   0   4    25.26    40.28    14.58 <
       956    2 -21   0   4    65.57    36.82    13.43 <
       956    1  19   0   4    65.57    36.82    13.43 <
       957    2 -22   0   4     2.35   -25.32    13.81 <
       957    1  20   0   4     2.35   -25.32    13.81 <
       958    2 -23   0   4    69.08    75.57    42.96 <
       958    1  21   0   4    69.08    75.57    42.96 <
       959    2  21  -1   4   194.06   161.11    23.02 o
       959    1 -23   1   4   194.06   161.11    23.02 o
       960    2  20  -1   4    83.39    83.62    20.71 o
       960    1 -22   1   4    83.39    83.62    20.71 o
       961    2  19  -1   4   126.78   142.70    20.33 o
       961    1 -21   1   4   126.78   142.70    20.33 o
       962    2  18  -1   4   210.68   201.00    21.86 o
       962    1 -20   1   4   210.68   201.00    21.86 o
       963    2  17  -1   4    30.13    24.93    15.73 <
       963    1 -19   1   4    30.13    24.93    15.73 <
       964    2  16  -1   4    84.61    87.46    16.49 o
       964    1 -18   1   4    84.61    87.46    16.49 o
       965    2  15  -1   4    79.27    88.23    13.81 o
       965    1 -17   1   4    79.27    88.23    13.81 o
       966    2  14  -1   4   239.64   249.33    16.88 o
       966    1 -16   1   4   239.64   249.33    16.88 o
       967    2  13  -1   4   272.88   298.43    12.27 o
       967    1 -15   1   4   272.88   298.43    12.27 o
       968    2  12  -1   4   100.14   107.79     8.82 o
       968    1 -14   1   4   100.14   107.79     8.82 o
       969    2  11  -1   4    21.20    36.44     8.06 o
       969    1 -13   1   4    21.20    36.44     8.06 o
       970    2  10  -1   4  1066.11  1152.68    17.65 o
       970    1 -12   1   4  1066.11  1152.68    17.65 o
       971    2   9  -1   4    25.44    21.86     4.99 o
       971    1 -11   1   4    25.44    21.86     4.99 o
       972    2   8  -1   4     1.52    -0.38     3.84 <
       972    1 -10   1   4     1.52    -0.38     3.84 <
       973    2   7  -1   4     5.08     1.92     3.45 <
       973    1  -9   1   4     5.08     1.92     3.45 <
       974    2   6  -1   4     1.19     3.07     3.45 <
       974    1  -8   1   4     1.19     3.07     3.45 <
       975    2   5  -1   4  4575.43  5151.20    43.35 o
       975    1  -7   1   4  4575.43  5151.20    43.35 o
       976    2   4  -1   4   203.75   230.92     7.29 o
       976    1  -6   1   4   203.75   230.92     7.29 o
       977    2   3  -1   4  2990.73  2916.03    25.70 o
       977    1  -5   1   4  2990.73  2916.03    25.70 o
       978    2   2  -1   4  5861.19  6293.14    56.77 o
       978    1  -4   1   4  5861.19  6293.14    56.77 o
       979    2   1  -1   4   221.41   223.63     4.99 o
       979    1  -3   1   4   221.41   223.63     4.99 o
       980    2   0  -1   4   246.78   269.28     5.37 o
       980    1  -2   1   4   246.78   269.28     5.37 o
       981    2  -1  -1   4  2291.01  2157.68    23.40 o
       981    1  -1   1   4  2291.01  2157.68    23.40 o
       982    2  -2  -1   4   875.23   739.56    11.51 o
       982    1   0   1   4   875.23   739.56    11.51 o
       983    2  -3  -1   4   422.18   357.12     8.06 o
       983    1   1   1   4   422.18   357.12     8.06 o
       984    2  -4  -1   4   275.34    89.76     8.44 o
       984    1   2   1   4   275.34    89.76     8.44 o
       985    2  -5  -1   4  1568.44  1538.19    19.95 o
       985    1   3   1   4  1568.44  1538.19    19.95 o
       986    2  -6  -1   4   240.41   381.67    10.36 o
       986    1   4   1   4   240.41   381.67    10.36 o
       987    2  -7  -1   4   932.91   953.98    17.26 o
       987    1   5   1   4   932.91   953.98    17.26 o
       988    2  -8  -1   4     0.58     2.69     4.60 <
       988    1   6   1   4     0.58     2.69     4.60 <
       989    2  -9  -1   4    73.48    59.84     4.60 o
       989    1   7   1   4    73.48    59.84     4.60 o
       990    2 -10  -1   4    17.52    28.39     4.99 o
       990    1   8   1   4    17.52    28.39     4.99 o
       991    2 -11  -1   4    43.44    43.35     4.99 o
       991    1   9   1   4    43.44    43.35     4.99 o
       992    2 -12  -1   4  1928.58  1941.72    20.71 o
       992    1  10   1   4  1928.58  1941.72    20.71 o
       993    2 -13  -1   4   498.47   451.48    11.12 o
       993    1  11   1   4   498.47   451.48    11.12 o
       994    2 -14  -1   4    59.73    67.89     6.52 o
       994    1  12   1   4    59.73    67.89     6.52 o
       995    2 -15  -1   4   541.52   573.85    13.43 o
       995    1  13   1   4   541.52   573.85    13.43 o
       996    2 -16  -1   4    48.89    69.05     8.44 o
       996    1  14   1   4    48.89    69.05     8.44 o
       997    2 -17  -1   4    23.29    11.51     9.59 <
       997    1  15   1   4    23.29    11.51     9.59 <
       998    2 -18  -1   4   161.65   139.63    15.73 o
       998    1  16   1   4   161.65   139.63    15.73 o
       999    2 -19  -1   4     2.20     8.44    13.04 <
       999    1  17   1   4     2.20     8.44    13.04 <
      1000    2 -20  -1   4     7.90     0.00    13.04 <
      1000    1  18   1   4     7.90     0.00    13.04 <
      1001    2 -21  -1   4    10.44    38.36    19.95 <
      1001    1  19   1   4    10.44    38.36    19.95 <
      1002    2 -22  -1   4    57.16    80.17    22.63 o
      1002    1  20   1   4    57.16    80.17    22.63 o
      1003    2 -23  -1   4     9.51    11.89    20.33 <
      1003    1  21   1   4     9.51    11.89    20.33 <
      1004    2  20  -2   4    45.24    33.76    19.56 <
      1004    1 -22   2   4    45.24    33.76    19.56 <
      1005    2  19  -2   4   101.21    79.79    19.95 o
      1005    1 -21   2   4   101.21    79.79    19.95 o
      1006    2  18  -2   4   140.23   123.90    18.80 o
      1006    1 -20   2   4   140.23   123.90    18.80 o
      1007    2  17  -2   4    21.36    13.04    14.19 <
      1007    1 -19   2   4    21.36    13.04    14.19 <
      1008    2  16  -2   4   167.29   161.49    16.49 o
      1008    1 -18   2   4   167.29   161.49    16.49 o
      1009    2  15  -2   4   361.89   372.85    18.41 o
      1009    1 -17   2   4   361.89   372.85    18.41 o
      1010    2  14  -2   4   231.37   296.90    13.81 o
      1010    1 -16   2   4   231.37   296.90    13.81 o
      1011    2  13  -2   4   176.80   229.77    12.27 o
      1011    1 -15   2   4   176.80   229.77    12.27 o
      1012    2  12  -2   4   105.19   129.65    11.51 o
      1012    1 -14   2   4   105.19   129.65    11.51 o
      1013    2  11  -2   4   116.58   125.82     9.97 o
      1013    1 -13   2   4   116.58   125.82     9.97 o
      1014    2  10  -2   4   340.46   345.23    13.04 o
      1014    1 -12   2   4   340.46   345.23    13.04 o
      1015    2   9  -2   4   282.59   291.53    12.66 o
      1015    1 -11   2   4   282.59   291.53    12.66 o
      1016    2   8  -2   4   217.07   250.48     9.59 o
      1016    1 -10   2   4   217.07   250.48     9.59 o
      1017    2   7  -2   4   179.86   178.37     8.82 o
      1017    1  -9   2   4   179.86   178.37     8.82 o
      1018    2   6  -2   4    93.07    61.76    17.26 o
      1018    1  -8   2   4    93.07    61.76    17.26 o
      1019    2   5  -2   4   184.49   162.26    16.49 o
      1019    1  -7   2   4   184.49   162.26    16.49 o
      1020    2   4  -2   4   145.90    45.65    21.10 <
      1020    1  -6   2   4   145.90    45.65    21.10 <
      1021    2   3  -2   4   563.78   531.65     8.44 o
      1021    1  -5   2   4   563.78   531.65     8.44 o
      1022    2   2  -2   4   848.53   999.25    10.36 o
      1022    1  -4   2   4   848.53   999.25    10.36 o
      1023    2   1  -2   4    86.11   101.27     4.60 o
      1023    1  -3   2   4    86.11   101.27     4.60 o
      1024    2   0  -2   4   487.44   616.04    11.12 o
      1024    1  -2   2   4   487.44   616.04    11.12 o
      1025    2  -1  -2   4     2.15     1.92     3.45 <
      1025    1  -1   2   4     2.15     1.92     3.45 <
      1026    2  -2  -2   4   409.34   497.90    15.73 o
      1026    1   0   2   4   409.34   497.90    15.73 o
      1027    2  -3  -2   4   371.64   404.68    14.19 o
      1027    1   1   2   4   371.64   404.68    14.19 o
      1028    2  -4  -2   4    85.45    69.05     9.21 o
      1028    1   2   2   4    85.45    69.05     9.21 o
      1029    2  -5  -2   4  1697.73  1860.78    24.93 o
      1029    1   3   2   4  1697.73  1860.78    24.93 o
      1030    2  -6  -2   4  3980.26  4237.11    45.26 o
      1030    1   4   2   4  3980.26  4237.11    45.26 o
      1031    2  -7  -2   4  2074.03  2074.83    28.00 o
      1031    1   5   2   4  2074.03  2074.83    28.00 o
      1032    2  -8  -2   4  2156.22  2138.89    28.77 o
      1032    1   6   2   4  2156.22  2138.89    28.77 o
      1033    2  -9  -2   4   198.41   194.48    11.89 o
      1033    1   7   2   4   198.41   194.48    11.89 o
      1034    2 -10  -2   4   617.12   591.11    12.66 o
      1034    1   8   2   4   617.12   591.11    12.66 o
      1035    2 -11  -2   4   287.37   280.02    11.12 o
      1035    1   9   2   4   287.37   280.02    11.12 o
      1036    2 -12  -2   4   100.42    98.58     8.82 o
      1036    1  10   2   4   100.42    98.58     8.82 o
      1037    2 -13  -2   4   820.94   794.79    19.56 o
      1037    1  11   2   4   820.94   794.79    19.56 o
      1038    2 -14  -2   4   486.49   443.81    15.34 o
      1038    1  12   2   4   486.49   443.81    15.34 o
      1039    2 -15  -2   4  1048.77  1008.84    22.63 o
      1039    1  13   2   4  1048.77  1008.84    22.63 o
      1040    2 -16  -2   4   529.17   538.56    18.03 o
      1040    1  14   2   4   529.17   538.56    18.03 o
      1041    2 -17  -2   4   139.08   159.19    14.96 o
      1041    1  15   2   4   139.08   159.19    14.96 o
      1042    2 -18  -2   4   106.74   114.31    17.65 o
      1042    1  16   2   4   106.74   114.31    17.65 o
      1043    2 -19  -2   4    38.19    28.00    15.73 <
      1043    1  17   2   4    38.19    28.00    15.73 <
      1044    2 -20  -2   4    71.27    93.21    18.41 o
      1044    1  18   2   4    71.27    93.21    18.41 o
      1045    2 -21  -2   4    31.33    15.73    15.73 <
      1045    1  19   2   4    31.33    15.73    15.73 <
      1046    2 -22  -2   4   249.77   276.95    30.69 o
      1046    1  20   2   4   249.77   276.95    30.69 o
      1047    2  19  -3   4   131.29    33.37    38.74 <
      1047    1 -21   3   4   131.29    33.37    38.74 <
      1048    2  18  -3   4    45.43   -56.00    32.99 <
      1048    1 -20   3   4    45.43   -56.00    32.99 <
      1049    2  17  -3   4     9.85     4.99    32.60 <
      1049    1 -19   3   4     9.85     4.99    32.60 <
      1050    2  16  -3   4     0.89     0.38     9.97 <
      1050    1 -18   3   4     0.89     0.38     9.97 <
      1051    2  15  -3   4    24.25    20.33     9.97 <
      1051    1 -17   3   4    24.25    20.33     9.97 <
      1052    2  14  -3   4   353.69   370.93    15.73 o
      1052    1 -16   3   4   353.69   370.93    15.73 o
      1053    2  13  -3   4  1042.95  1044.89    22.63 o
      1053    1 -15   3   4  1042.95  1044.89    22.63 o
      1054    2  12  -3   4  1350.14  1308.42    28.39 o
      1054    1 -14   3   4  1350.14  1308.42    28.39 o
      1055    2  11  -3   4  2103.72  1940.19    34.91 o
      1055    1 -13   3   4  2103.72  1940.19    34.91 o
      1056    2  10  -3   4   852.01   845.43    21.86 o
      1056    1 -12   3   4   852.01   845.43    21.86 o
      1057    2   9  -3   4   111.64   117.76    10.36 o
      1057    1 -11   3   4   111.64   117.76    10.36 o
      1058    2   8  -3   4    18.17    20.71     6.14 o
      1058    1 -10   3   4    18.17    20.71     6.14 o
      1059    2   7  -3   4   276.79   278.87     9.21 o
      1059    1  -9   3   4   276.79   278.87     9.21 o
      1060    2   6  -3   4    24.07    31.07     4.99 o
      1060    1  -8   3   4    24.07    31.07     4.99 o
      1061    2   4  -3   4  1378.66  1432.70    18.80 o
      1061    1  -6   3   4  1378.66  1432.70    18.80 o
      1062    2   3  -3   4  3454.73  3293.10    28.00 o
      1062    1  -5   3   4  3454.73  3293.10    28.00 o
      1063    2   2  -3   4  4377.43  4409.73    35.29 o
      1063    1  -4   3   4  4377.43  4409.73    35.29 o
      1064    2   1  -3   4  1859.80  1891.09    19.95 o
      1064    1  -3   3   4  1859.80  1891.09    19.95 o
      1065    2   0  -3   4   161.80   168.40     6.90 o
      1065    1  -2   3   4   161.80   168.40     6.90 o
      1066    2  -1  -3   4   921.54   983.14    13.04 o
      1066    1  -1   3   4   921.54   983.14    13.04 o
      1067    2  -2  -3   4    38.50    43.73     4.99 o
      1067    1   0   3   4    38.50    43.73     4.99 o
      1068    2  -3  -3   4    85.57    28.77    11.89 <
      1068    1   1   3   4    85.57    28.77    11.89 <
      1069    2  -4  -3   4  2533.00  2580.01    28.77 o
      1069    1   2   3   4  2533.00  2580.01    28.77 o
      1070    2  -5  -3   4  1764.11  1752.23    21.48 o
      1070    1   3   3   4  1764.11  1752.23    21.48 o
      1071    2  -6  -3   4  5726.87  5559.34    59.84 o
      1071    1   4   3   4  5726.87  5559.34    59.84 o
      1072    2  -7  -3   4  2992.81  3005.03    38.74 o
      1072    1   5   3   4  2992.81  3005.03    38.74 o
      1073    2  -8  -3   4   434.84   466.44    19.95 o
      1073    1   6   3   4   434.84   466.44    19.95 o
      1074    2  -9  -3   4   779.12   747.61    16.11 o
      1074    1   7   3   4   779.12   747.61    16.11 o
      1075    2 -10  -3   4   138.81   126.58     9.59 o
      1075    1   8   3   4   138.81   126.58     9.59 o
      1076    2 -11  -3   4   342.51   348.68    15.73 o
      1076    1   9   3   4   342.51   348.68    15.73 o
      1077    2 -12  -3   4    62.09    64.44    19.56 o
      1077    1  10   3   4    62.09    64.44    19.56 o
      1078    2 -13  -3   4   298.56   438.44    26.47 o
      1078    1  11   3   4   298.56   438.44    26.47 o
      1079    2 -14  -3   4   383.58   437.29    16.11 o
      1079    1  12   3   4   383.58   437.29    16.11 o
      1080    2 -15  -3   4   840.78   835.45    23.02 o
      1080    1  13   3   4   840.78   835.45    23.02 o
      1081    2 -16  -3   4   605.00   543.16    19.56 o
      1081    1  14   3   4   605.00   543.16    19.56 o
      1082    2 -17  -3   4    10.10     8.44    13.81 <
      1082    1  15   3   4    10.10     8.44    13.81 <
      1083    2 -18  -3   4     3.69     2.69    13.81 <
      1083    1  16   3   4     3.69     2.69    13.81 <
      1084    2 -19  -3   4     5.80   -15.73    17.65 <
      1084    1  17   3   4     5.80   -15.73    17.65 <
      1085    2 -20  -3   4     8.76     0.77    18.41 <
      1085    1  18   3   4     8.76     0.77    18.41 <
      1086    2 -21  -3   4    28.30    56.77    22.63 <
      1086    1  19   3   4    28.30    56.77    22.63 <
      1087    2  17  -4   4   115.86    79.40    39.51 <
      1087    1 -19   4   4   115.86    79.40    39.51 <
      1088    2  16  -4   4    45.00    28.00    21.48 <
      1088    1 -18   4   4    45.00    28.00    21.48 <
      1089    2  15  -4   4    12.93    18.41    19.95 <
      1089    1 -17   4   4    12.93    18.41    19.95 <
      1090    2  14  -4   4     0.74    16.88    19.56 <
      1090    1 -16   4   4     0.74    16.88    19.56 <
      1091    2  13  -4   4    42.54    34.14    14.19 <
      1091    1 -15   4   4    42.54    34.14    14.19 <
      1092    2  12  -4   4     5.44     1.15    11.89 <
      1092    1 -14   4   4     5.44     1.15    11.89 <
      1093    2  11  -4   4   613.45   586.12    21.48 o
      1093    1 -13   4   4   613.45   586.12    21.48 o
      1094    2  10  -4   4   312.45   366.71    17.26 o
      1094    1 -12   4   4   312.45   366.71    17.26 o
      1095    2   9  -4   4   429.42   457.24    18.41 o
      1095    1 -11   4   4   429.42   457.24    18.41 o
      1096    2   8  -4   4   549.14   537.41    18.41 o
      1096    1 -10   4   4   549.14   537.41    18.41 o
      1097    2   7  -4   4    18.00    24.17     8.06 o
      1097    1  -9   4   4    18.00    24.17     8.06 o
      1098    2   6  -4   4   213.71   239.74    12.27 o
      1098    1  -8   4   4   213.71   239.74    12.27 o
      1099    2   5  -4   4   310.49   314.54    11.51 o
      1099    1  -7   4   4   310.49   314.54    11.51 o
      1100    2   4  -4   4    42.55    51.78     6.90 o
      1100    1  -6   4   4    42.55    51.78     6.90 o
      1101    2   3  -4   4   113.94   112.01     9.21 o
      1101    1  -5   4   4   113.94   112.01     9.21 o
      1102    2   2  -4   4    36.76    56.77     8.44 o
      1102    1  -4   4   4    36.76    56.77     8.44 o
      1103    2   1  -4   4    73.55    79.79     7.29 o
      1103    1  -3   4   4    73.55    79.79     7.29 o
      1104    2   0  -4   4    78.61    66.36    10.36 o
      1104    1  -2   4   4    78.61    66.36    10.36 o
      1105    2  -1  -4   4   207.58   198.70     9.97 o
      1105    1  -1   4   4   207.58   198.70     9.97 o
      1106    2  -2  -4   4  1262.13  1274.66    21.10 o
      1106    1   0   4   4  1262.13  1274.66    21.10 o
      1107    2  -3  -4   4   182.15   191.79     9.59 o
      1107    1   1   4   4   182.15   191.79     9.59 o
      1108    2  -4  -4   4   941.20   913.32    14.96 o
      1108    1   2   4   4   941.20   913.32    14.96 o
      1109    2  -5  -4   4   544.52   512.86    12.66 o
      1109    1   3   4   4   544.52   512.86    12.66 o
      1110    2  -6  -4   4   410.60   422.71    12.27 o
      1110    1   4   4   4   410.60   422.71    12.27 o
      1111    2  -7  -4   4    16.37    26.85     5.75 o
      1111    1   5   4   4    16.37    26.85     5.75 o
      1112    2  -8  -4   4    13.34    20.71     5.75 o
      1112    1   6   4   4    13.34    20.71     5.75 o
      1113    2  -9  -4   4    25.37    16.88     5.75 <
      1113    1   7   4   4    25.37    16.88     5.75 <
      1114    2 -10  -4   4   508.90   547.00    16.88 o
      1114    1   8   4   4   508.90   547.00    16.88 o
      1115    2 -11  -4   4   667.87   652.10    18.80 o
      1115    1   9   4   4   667.87   652.10    18.80 o
      1116    2 -12  -4   4   725.08   754.13    21.10 o
      1116    1  10   4   4   725.08   754.13    21.10 o
      1117    2 -13  -4   4   362.74   367.09    16.49 o
      1117    1  11   4   4   362.74   367.09    16.49 o
      1118    2 -14  -4   4   140.43   141.54    13.04 o
      1118    1  12   4   4   140.43   141.54    13.04 o
      1119    2 -15  -4   4    59.15    61.76    11.51 o
      1119    1  13   4   4    59.15    61.76    11.51 o
      1120    2 -16  -4   4    13.69    32.60    13.81 <
      1120    1  14   4   4    13.69    32.60    13.81 <
      1121    2 -17  -4   4    22.37    11.89    16.49 <
      1121    1  15   4   4    22.37    11.89    16.49 <
      1122    2 -18  -4   4   194.10   200.23    21.86 o
      1122    1  16   4   4   194.10   200.23    21.86 o
      1123    2 -19  -4   4   464.48   468.36    28.00 o
      1123    1  17   4   4   464.48   468.36    28.00 o
      1124    2  15  -5   4    50.92    54.47    23.02 <
      1124    1 -17   5   4    50.92    54.47    23.02 <
      1125    2  14  -5   4   377.47   362.11    33.37 o
      1125    1 -16   5   4   377.47   362.11    33.37 o
      1126    2  13  -5   4    47.88    52.94    21.48 <
      1126    1 -15   5   4    47.88    52.94    21.48 <
      1127    2  12  -5   4   242.65   247.03    28.00 o
      1127    1 -14   5   4   242.65   247.03    28.00 o
      1128    2  11  -5   4   839.25   782.14    40.66 o
      1128    1 -13   5   4   839.25   782.14    40.66 o
      1129    2  10  -5   4   441.02   443.81    25.70 o
      1129    1 -12   5   4   441.02   443.81    25.70 o
      1130    2   9  -5   4   374.25   393.18    23.78 o
      1130    1 -11   5   4   374.25   393.18    23.78 o
      1131    2   8  -5   4   470.52   454.17    21.10 o
      1131    1 -10   5   4   470.52   454.17    21.10 o
      1132    2   7  -5   4   873.04   796.71    24.93 o
      1132    1  -9   5   4   873.04   796.71    24.93 o
      1133    2   6  -5   4   673.27   694.68    26.08 o
      1133    1  -8   5   4   673.27   694.68    26.08 o
      1134    2   5  -5   4   782.39   739.94    22.63 o
      1134    1  -7   5   4   782.39   739.94    22.63 o
      1135    2   4  -5   4  1102.51  1123.53    26.08 o
      1135    1  -6   5   4  1102.51  1123.53    26.08 o
      1136    2   3  -5   4  1586.92  1519.78    26.08 o
      1136    1  -5   5   4  1586.92  1519.78    26.08 o
      1137    2   2  -5   4  1443.05  1377.85    25.70 o
      1137    1  -4   5   4  1443.05  1377.85    25.70 o
      1138    2   1  -5   4   338.93   359.80    14.58 o
      1138    1  -3   5   4   338.93   359.80    14.58 o
      1139    2   0  -5   4   989.68   942.09    20.33 o
      1139    1  -2   5   4   989.68   942.09    20.33 o
      1140    2  -1  -5   4   664.07   724.98    19.95 o
      1140    1  -1   5   4   664.07   724.98    19.95 o
      1141    2  -2  -5   4   266.97   296.51    12.66 o
      1141    1   0   5   4   266.97   296.51    12.66 o
      1142    2  -3  -5   4  1018.93   988.51    19.95 o
      1142    1   1   5   4  1018.93   988.51    19.95 o
      1143    2  -4  -5   4   461.36   478.33    14.58 o
      1143    1   2   5   4   461.36   478.33    14.58 o
      1144    2  -5  -5   4   973.03  1006.53    19.95 o
      1144    1   3   5   4   973.03  1006.53    19.95 o
      1145    2  -6  -5   4  1116.41  1118.54    21.10 o
      1145    1   4   5   4  1116.41  1118.54    21.10 o
      1146    2  -7  -5   4   298.31   300.35    13.04 o
      1146    1   5   5   4   298.31   300.35    13.04 o
      1147    2  -8  -5   4   513.63   507.10    19.95 o
      1147    1   6   5   4   513.63   507.10    19.95 o
      1148    2  -9  -5   4   402.92   432.30    19.56 o
      1148    1   7   5   4   402.92   432.30    19.56 o
      1149    2 -10  -5   4   441.02   410.05    19.18 o
      1149    1   8   5   4   441.02   410.05    19.18 o
      1150    2 -11  -5   4   352.11   335.26    17.26 o
      1150    1   9   5   4   352.11   335.26    17.26 o
      1151    2 -12  -5   4   392.26   370.16    18.80 o
      1151    1  10   5   4   392.26   370.16    18.80 o
      1152    2 -13  -5   4   549.88   537.79    28.00 o
      1152    1  11   5   4   549.88   537.79    28.00 o
      1153    2 -14  -5   4   336.48   365.18    25.70 o
      1153    1  12   5   4   336.48   365.18    25.70 o
      1154    2 -15  -5   4   257.72   272.35    23.40 o
      1154    1  13   5   4   257.72   272.35    23.40 o
      1155    2 -16  -5   4    84.11   107.02    18.41 o
      1155    1  14   5   4    84.11   107.02    18.41 o
      1156    2 -17  -5   4    94.23    97.43    19.18 o
      1156    1  15   5   4    94.23    97.43    19.18 o
      1157    2  12  -6   4    12.42    23.40    29.54 <
      1157    1 -14   6   4    12.42    23.40    29.54 <
      1158    2  11  -6   4    35.22    64.06    30.69 <
      1158    1 -13   6   4    35.22    64.06    30.69 <
      1159    2  10  -6   4   244.13   260.07    41.04 o
      1159    1 -12   6   4   244.13   260.07    41.04 o
      1160    2   9  -6   4    41.53    38.74    28.77 <
      1160    1 -11   6   4    41.53    38.74    28.77 <
      1161    2   8  -6   4     3.17     4.99    25.32 <
      1161    1 -10   6   4     3.17     4.99    25.32 <
      1162    2   7  -6   4    10.32    28.77    26.85 <
      1162    1  -9   6   4    10.32    28.77    26.85 <
      1163    2   6  -6   4    51.57    42.96    26.47 <
      1163    1  -8   6   4    51.57    42.96    26.47 <
      1164    2   5  -6   4   125.11   115.84    20.71 o
      1164    1  -7   6   4   125.11   115.84    20.71 o
      1165    2   4  -6   4    76.45    62.52    19.56 o
      1165    1  -6   6   4    76.45    62.52    19.56 o
      1166    2   3  -6   4    49.55    66.74    14.96 o
      1166    1  -5   6   4    49.55    66.74    14.96 o
      1167    2   2  -6   4    77.49   124.67    15.34 o
      1167    1  -4   6   4    77.49   124.67    15.34 o
      1168    2   1  -6   4   193.54   178.75    16.88 o
      1168    1  -3   6   4   193.54   178.75    16.88 o
      1169    2   0  -6   4   344.64   328.35    17.26 o
      1169    1  -2   6   4   344.64   328.35    17.26 o
      1170    2  -1  -6   4    84.63    93.98    12.27 o
      1170    1  -1   6   4    84.63    93.98    12.27 o
      1171    2  -2  -6   4    41.16    44.50     9.97 o
      1171    1   0   6   4    41.16    44.50     9.97 o
      1172    2  -3  -6   4    84.56    92.06    11.89 o
      1172    1   1   6   4    84.56    92.06    11.89 o
      1173    2  -4  -6   4   721.67   665.91    23.02 o
      1173    1   2   6   4   721.67   665.91    23.02 o
      1174    2  -5  -6   4   210.24   196.01    15.34 o
      1174    1   3   6   4   210.24   196.01    15.34 o
      1175    2  -6  -6   4     6.93     2.69    11.89 <
      1175    1   4   6   4     6.93     2.69    11.89 <
      1176    2  -7  -6   4    68.09    32.22    16.11 <
      1176    1   5   6   4    68.09    32.22    16.11 <
      1177    2  -8  -6   4     5.50     4.99    16.49 <
      1177    1   6   6   4     5.50     4.99    16.49 <
      1178    2  -9  -6   4     5.83    23.78    17.65 <
      1178    1   7   6   4     5.83    23.78    17.65 <
      1179    2 -10  -6   4     0.58     3.45    16.88 <
      1179    1   8   6   4     0.58     3.45    16.88 <
      1180    2 -11  -6   4   193.16   214.04    27.23 o
      1180    1   9   6   4   193.16   214.04    27.23 o
      1181    2 -12  -6   4   452.39   466.06    34.91 o
      1181    1  10   6   4   452.39   466.06    34.91 o
      1182    2 -13  -6   4   311.26   360.96    32.22 o
      1182    1  11   6   4   311.26   360.96    32.22 o
      1183    2 -14  -6   4    47.13    78.64    22.63 o
      1183    1  12   6   4    47.13    78.64    22.63 o
      1184    2   6  -7   4   858.27  1068.29    76.72 o
      1184    1  -8   7   4   858.27  1068.29    76.72 o
      1185    2   5  -7   4   263.02   225.55    44.11 o
      1185    1  -7   7   4   263.02   225.55    44.11 o
      1186    2   4  -7   4    61.22    64.06    32.99 <
      1186    1  -6   7   4    61.22    64.06    32.99 <
      1187    2   3  -7   4   163.86   199.85    42.96 o
      1187    1  -5   7   4   163.86   199.85    42.96 o
      1188    2   2  -7   4   102.75   154.20    37.21 o
      1188    1  -4   7   4   102.75   154.20    37.21 o
      1189    2   1  -7   4   584.12   630.62    39.13 o
      1189    1  -3   7   4   584.12   630.62    39.13 o
      1190    2   0  -7   4  1217.51  1247.43    47.18 o
      1190    1  -2   7   4  1217.51  1247.43    47.18 o
      1191    2  -1  -7   4  1266.66  1184.52    46.41 o
      1191    1  -1   7   4  1266.66  1184.52    46.41 o
      1192    2  -2  -7   4  1181.70  1171.86    46.80 o
      1192    1   0   7   4  1181.70  1171.86    46.80 o
      1193    2  -3  -7   4   567.42   585.74    37.21 o
      1193    1   1   7   4   567.42   585.74    37.21 o
      1194    2  -4  -7   4   499.11   523.98    35.29 o
      1194    1   2   7   4   499.11   523.98    35.29 o
      1195    2  -5  -7   4    80.93   102.80    21.10 o
      1195    1   3   7   4    80.93   102.80    21.10 o
      1196    2  -6  -7   4     8.18    14.58    17.26 <
      1196    1   4   7   4     8.18    14.58    17.26 <
      1197    2  -7  -7   4   317.55   336.02    30.69 o
      1197    1   5   7   4   317.55   336.02    30.69 o
      1198    2  -8  -7   4   629.33   665.14    40.28 o
      1198    1   6   7   4   629.33   665.14    40.28 o
      1199    1 -23   1   5   442.26   378.22    35.29 o
      1200    1 -22   1   5   984.41   929.43    46.41 o
      1201    1 -21   1   5   462.63   438.06    34.91 o
      1202    1 -20   1   5   496.88   494.83    34.91 o
      1203    1 -19   1   5   747.77   632.92    34.52 o
      1204    1 -18   1   5    71.63    64.44    16.49 o
      1205    1 -17   1   5    65.31    48.72    14.96 o
      1206    1 -16   1   5   820.99   777.92    29.54 o
      1207    1 -15   1   5  1701.11  1687.40    26.08 o
      1208    1 -14   1   5  2636.60  2585.77    36.82 o
      1209    1 -13   1   5  3115.75  3071.00    41.43 o
      1210    1 -12   1   5  4265.68  3980.11    49.10 o
      1211    1 -11   1   5  4246.97  4066.80    37.21 o
      1212    1 -10   1   5   762.42   655.55    12.27 o
      1213    1  -9   1   5   450.92   405.84     8.44 o
      1214    1  -8   1   5  2707.99  2676.68    31.07 o
      1215    1  -7   1   5  1963.81  2025.34    25.32 o
      1216    1  -6   1   5  2268.43  2260.10    21.86 o
      1217    1  -5   1   5 11138.80 11610.10    92.83 o
      1218    1  -4   1   5 12301.10 12911.60   103.57 o
      1219    1  -3   1   5  6968.13  7473.06    54.47 o
      1220    1  -2   1   5  8768.05  9382.17    63.68 o
      1221    1  -1   1   5  1630.09  1715.40    19.18 o
      1222    1   0   1   5  2424.47  2554.69    25.70 o
      1223    1   1   1   5  2897.65  2902.99    29.54 o
      1224    1   2   1   5   396.37   273.50     8.82 o
      1225    1   3   1   5  7035.30  7101.74    59.46 o
      1226    1   4   1   5  5820.75  5649.87    49.87 o
      1227    1   5   1   5  1305.41  1150.76    15.73 o
      1228    1   6   1   5  3748.38  3965.15    38.74 o
      1229    1   7   1   5   966.29   950.91    12.27 o
      1230    1   8   1   5    31.85    51.40     4.99 o
      1231    1   9   1   5   118.15   122.75    13.04 o
      1232    1  10   1   5   536.27   592.26    12.27 o
      1233    1  11   1   5   222.76   224.78    12.27 o
      1234    1  12   1   5   612.10   654.02    13.43 o
      1235    1  13   1   5  1315.79  1325.30    19.56 o
      1236    1  14   1   5   266.40   295.75    14.19 o
      1237    1  15   1   5    61.29    71.35    11.51 o
      1238    1  16   1   5     6.58     0.38     9.59 <
      1239    1  17   1   5    29.58    37.98    11.51 o
      1240    1  18   1   5    12.76    16.88    11.51 <
      1241    1  19   1   5     2.94     9.59    13.81 <
      1242    1  20   1   5    77.62    64.44    16.88 o
      1243    1 -22   2   5     0.81   -23.02    18.03 <
      1244    1 -21   2   5     0.03   -14.96    17.26 <
      1245    1 -20   2   5   138.95   138.86    21.10 o
      1246    1 -19   2   5   119.95   123.90    19.95 o
      1247    1 -18   2   5    56.92    38.74    13.04 <
      1248    1 -17   2   5     2.31    -2.69     8.44 <
      1249    1 -16   2   5   307.51   339.48    17.65 o
      1250    1 -15   2   5   103.12   101.65    11.12 o
      1251    1 -14   2   5     7.89    12.27     8.06 <
      1252    1 -13   2   5    72.43    81.32     9.59 o
      1253    1 -12   2   5   217.31   225.55    12.66 o
      1254    1 -11   2   5   758.53   731.89    16.88 o
      1255    1 -10   2   5  1180.26  1129.67    17.65 o
      1256    1  -9   2   5     2.30     6.90     5.37 <
      1257    1  -8   2   5   708.30   746.46    13.43 o
      1258    1  -7   2   5     3.15     5.75     3.45 <
      1259    1  -6   2   5    16.74    13.43     3.45 o
      1260    1  -5   2   5    79.99   118.14     4.99 o
      1261    1  -4   2   5   730.89   626.02     9.21 o
      1262    1  -3   2   5  4171.01  3902.24    33.37 o
      1263    1  -2   2   5  1048.93  1069.06    15.34 o
      1264    1  -1   2   5   105.23    77.87     5.75 o
      1265    1   0   2   5   827.76   879.95    17.26 o
      1266    1   1   2   5   756.27   863.84    16.88 o
      1267    1   2   2   5   186.15   204.07     9.97 o
      1268    1   3   2   5   549.99   707.72    16.88 o
      1269    1   4   2   5   269.91   276.95    12.27 o
      1270    1   5   2   5  1793.57  1734.20    28.39 o
      1271    1   6   2   5  2083.99  1893.01    29.54 o
      1272    1   7   2   5  1718.93  1697.38    26.47 o
      1273    1   8   2   5   419.50   467.98    12.27 o
      1274    1   9   2   5   162.99   159.96     9.21 o
      1275    1  10   2   5    41.45    33.76     7.67 o
      1276    1  11   2   5    34.88    35.67     9.21 o
      1277    1  12   2   5     4.88    13.81     9.21 <
      1278    1  13   2   5    78.41    89.76    11.12 o
      1279    1  14   2   5   504.25   497.90    17.65 o
      1280    1  15   2   5   706.12   659.77    23.78 o
      1281    1  16   2   5   169.49   166.48    18.41 o
      1282    1  17   2   5    78.31    92.44    17.26 o
      1283    1  18   2   5     0.35   -16.49    14.58 <
      1284    1  19   2   5     7.50    14.58    15.73 <
      1285    1  20   2   5     0.45     2.69    21.10 <
      1286    1 -21   3   5   188.72    99.73    40.66 <
      1287    1 -20   3   5   258.27   259.69    49.87 o
      1288    1 -19   3   5   326.50   298.05    21.48 o
      1289    1 -18   3   5   661.24   663.99    23.02 o
      1290    1 -17   3   5   594.32   577.30    21.86 o
      1291    1 -16   3   5   558.60   523.98    19.95 o
      1292    1 -15   3   5   290.24   310.71    17.26 o
      1293    1 -14   3   5   339.55   334.49    16.88 o
      1294    1 -13   3   5   837.42   808.22    22.63 o
      1295    1 -12   3   5   710.93   697.75    19.95 o
      1296    1 -11   3   5  1203.46  1169.18    24.93 o
      1297    1 -10   3   5  2209.03  2143.49    34.91 o
      1298    1  -9   3   5  3020.92  2951.32    32.22 o
      1299    1  -8   3   5  2806.48  2597.66    25.70 o
      1300    1  -7   3   5  1184.18  1135.80    14.19 o
      1301    1  -6   3   5  1216.49  1213.67    14.96 o
      1302    1  -5   3   5  1264.85  1243.21    14.96 o
      1303    1  -4   3   5   758.53   777.53    11.89 o
      1304    1  -3   3   5  1165.15  1169.56    15.73 o
      1305    1  -2   3   5  1176.48  1118.54    16.88 o
      1306    1  -1   3   5  3488.05  3522.10    29.92 o
      1307    1   0   3   5  2783.31  2857.35    28.77 o
      1308    1   1   3   5   878.95   855.02    15.73 o
      1309    1   2   3   5  1129.89  1066.37    22.63 o
      1310    1   3   3   5   316.52   299.97    12.66 o
      1311    1   4   3   5   761.12   784.82    18.80 o
      1312    1   5   3   5   413.43   350.98    15.73 o
      1313    1   6   3   5   219.05   227.08    14.58 o
      1314    1   7   3   5  1757.02  1746.09    36.82 o
      1315    1   8   3   5  1402.89  1356.37    26.85 o
      1316    1   9   3   5   721.86   723.45    21.10 o
      1317    1  10   3   5   252.18   268.89    16.49 o
      1318    1  11   3   5   129.28   171.46    15.34 o
      1319    1  12   3   5    96.74    93.98    12.27 o
      1320    1  13   3   5    13.69     2.69    11.12 <
      1321    1  14   3   5     2.10     5.75     9.97 <
      1322    1  15   3   5     5.84    11.12    13.81 <
      1323    1  16   3   5    72.25    69.43    15.73 o
      1324    1  17   3   5    66.29    18.03    19.56 <
      1325    1  18   3   5     5.60    -0.77    18.03 <
      1326    1  19   3   5    29.05    19.18    20.71 <
      1327    1 -19   4   5    82.07    78.64    24.93 o
      1328    1 -18   4   5     1.23    20.33    19.95 <
      1329    1 -17   4   5    36.00    54.47    21.48 <
      1330    1 -16   4   5    22.00    15.34    18.80 <
      1331    1 -15   4   5   116.04   143.46    13.43 o
      1332    1 -14   4   5    22.87    12.66     9.97 <
      1333    1 -13   4   5   150.28   143.08    13.43 o
      1334    1 -12   4   5   669.26   625.63    22.25 o
      1335    1 -11   4   5   351.74   332.95    16.11 o
      1336    1 -10   4   5   243.55   258.15    14.96 o
      1337    1  -9   4   5   132.25   127.35    11.12 o
      1338    1  -8   4   5   143.30   145.76     9.21 o
      1339    1  -7   4   5     7.16     2.30     6.52 <
      1340    1  -6   4   5     4.12    11.12     6.52 <
      1341    1  -5   4   5     5.21     7.67     7.29 <
      1342    1  -4   4   5  2313.59  2181.46    27.23 o
      1343    1  -3   4   5  3042.83  2809.78    31.84 o
      1344    1  -2   4   5  1261.64  1127.36    19.18 o
      1345    1  -1   4   5  1028.09   962.80    18.03 o
      1346    1   0   4   5    90.55   107.02     8.44 o
      1347    1   1   4   5     5.65     3.45     8.44 <
      1348    1   2   4   5   223.27   181.05    11.89 o
      1349    1   3   4   5   307.96   286.92    10.36 o
      1350    1   4   4   5   684.89   678.57    14.96 o
      1351    1   5   4   5  1567.22  1464.15    21.48 o
      1352    1   6   4   5   986.44   897.21    18.03 o
      1353    1   7   4   5  1187.68  1072.13    22.63 o
      1354    1   8   4   5  1164.40  1068.29    23.40 o
      1355    1   9   4   5   205.09   199.08    12.66 o
      1356    1  10   4   5     2.45    20.33     8.44 <
      1357    1  11   4   5    20.69    11.12     8.82 <
      1358    1  12   4   5    51.04    41.43     9.97 o
      1359    1  13   4   5   447.59   434.61    18.80 o
      1360    1  14   4   5   592.49   524.36    26.47 o
      1361    1  15   4   5   365.46   324.52    23.02 o
      1362    1  16   4   5   394.52   380.52    25.32 o
      1363    1  17   4   5   106.68   112.78    19.95 o
      1364    1 -17   5   5   378.56   408.14    35.67 o
      1365    1 -16   5   5   455.72   394.71    34.52 o
      1366    1 -15   5   5   447.54   394.71    34.52 o
      1367    1 -14   5   5     2.50    14.19    18.80 <
      1368    1 -13   5   5     3.87    17.26    16.88 <
      1369    1 -12   5   5   168.49   173.38    18.41 o
      1370    1 -11   5   5   117.14   116.99    14.19 o
      1371    1 -10   5   5   499.00   464.52    21.10 o
      1372    1  -9   5   5   756.32   730.35    28.39 o
      1373    1  -8   5   5   848.17   805.15    28.39 o
      1374    1  -7   5   5   850.30   734.95    22.63 o
      1375    1  -6   5   5    62.88    63.68     9.59 o
      1376    1  -5   5   5    94.90    94.36    10.36 o
      1377    1  -4   5   5   103.68    97.05    10.36 o
      1378    1  -3   5   5    45.63    54.47    10.74 o
      1379    1  -2   5   5  1158.33  1067.14    23.78 o
      1380    1  -1   5   5  1331.60  1285.79    33.37 o
      1381    1   0   5   5   495.94   486.77    17.26 o
      1382    1   1   5   5  1211.75  1122.38    21.10 o
      1383    1   2   5   5   838.45   748.38    18.03 o
      1384    1   3   5   5     1.57     9.21     6.52 <
      1385    1   4   5   5    32.08    35.29     7.67 o
      1386    1   5   5   5    92.39    80.17     8.82 o
      1387    1   6   5   5   108.53   123.90    12.66 o
      1388    1   7   5   5    43.61    55.24    11.12 o
      1389    1   8   5   5   193.76   184.12    14.58 o
      1390    1   9   5   5   295.80   287.31    16.11 o
      1391    1  10   5   5    82.19    97.05    13.04 o
      1392    1  11   5   5     3.97    13.43    10.74 <
      1393    1  12   5   5     0.97    39.13    15.34 <
      1394    1  13   5   5     0.66    19.56    16.11 <
      1395    1  14   5   5     1.82     8.44    14.96 <
      1396    1  15   5   5   133.09   159.96    21.48 o
      1397    1 -14   6   5    28.25    60.61    32.60 <
      1398    1 -13   6   5    10.60     7.29    29.15 <
      1399    1 -12   6   5    15.90    12.27    28.39 <
      1400    1 -11   6   5     0.52     9.59    26.85 <
      1401    1 -10   6   5    76.36    86.69    31.84 <
      1402    1  -9   6   5     8.23   -12.66    16.11 <
      1403    1  -8   6   5   295.27   332.19    29.15 o
      1404    1  -7   6   5   581.99   571.93    33.76 o
      1405    1  -6   6   5   233.99   224.78    20.71 o
      1406    1  -5   6   5   180.51   171.46    18.03 o
      1407    1  -4   6   5    32.86    36.44    12.66 <
      1408    1  -3   6   5     7.14    25.70     9.59 <
      1409    1  -2   6   5     8.92    16.49     9.59 <
      1410    1  -1   6   5   133.25   108.56    12.66 o
      1411    1   0   6   5   279.33   276.57    16.88 o
      1412    1   1   6   5   823.48   782.90    24.17 o
      1413    1   2   6   5  1204.05  1124.30    28.77 o
      1414    1   3   6   5   967.97   870.36    26.47 o
      1415    1   4   6   5   638.52   591.88    22.25 o
      1416    1   5   6   5   144.48   125.82    21.10 o
      1417    1   6   6   5    63.61   107.79    21.10 o
      1418    1   7   6   5   151.44   207.90    25.32 o
      1419    1   8   6   5    89.09    78.64    21.48 o
      1420    1   9   6   5   156.09   166.86    23.78 o
      1421    1  10   6   5   488.47   515.16    36.06 o
      1422    1  11   6   5   450.99   394.71    32.22 o
      1423    1  -8   7   5   331.45   355.20    54.47 o
      1424    1  -7   7   5    38.97    25.70    34.14 <
      1425    1  -6   7   5     4.31    77.87    36.06 <
      1426    1  -5   7   5     2.01    -3.84    28.00 <
      1427    1  -4   7   5    21.10    73.27    21.10 o
      1428    1  -3   7   5    16.50    43.73    19.56 <
      1429    1  -2   7   5   109.46   120.83    22.63 o
      1430    1  -1   7   5   190.84   221.33    27.23 o
      1431    1   0   7   5    78.68   108.17    21.48 o
      1432    1   1   7   5   134.91   157.27    23.02 o
      1433    1   2   7   5    31.18    61.37    14.58 o
      1434    1   3   7   5    17.44    27.23    16.49 <
      1435    1   4   7   5    32.40    52.94    18.41 <
      1436    1   5   7   5     0.17    20.71    17.26 <
      1437    2  20   0   6    19.89    37.98    26.85 <
      1437    1 -23   0   6    19.89    37.98    26.85 <
      1438    2  19   0   6   105.68    66.74    26.85 <
      1438    1 -22   0   6   105.68    66.74    26.85 <
      1439    2  18   0   6   238.87   234.76    32.22 o
      1439    1 -21   0   6   238.87   234.76    32.22 o
      1440    2  17   0   6   593.54   624.86    41.04 o
      1440    1 -20   0   6   593.54   624.86    41.04 o
      1441    2  16   0   6   601.75   630.62    40.66 o
      1441    1 -19   0   6   601.75   630.62    40.66 o
      1442    2  15   0   6   767.98   754.13    42.19 o
      1442    1 -18   0   6   767.98   754.13    42.19 o
      1443    2  14   0   6    91.04    54.47    20.71 <
      1443    1 -17   0   6    91.04    54.47    20.71 <
      1444    2  13   0   6   856.86   815.89    41.81 o
      1444    1 -16   0   6   856.86   815.89    41.81 o
      1445    2  12   0   6   299.15   307.64    26.47 o
      1445    1 -15   0   6   299.15   307.64    26.47 o
      1446    2  11   0   6     3.57    -5.37    10.74 <
      1446    1 -14   0   6     3.57    -5.37    10.74 <
      1447    2  10   0   6   884.28   952.83    21.86 o
      1447    1 -13   0   6   884.28   952.83    21.86 o
      1448    2   9   0   6  1846.53  1830.48    31.84 o
      1448    1 -12   0   6  1846.53  1830.48    31.84 o
      1449    2   8   0   6 10717.30  9935.69   154.59 o
      1449    1 -11   0   6 10717.30  9935.69   154.59 o
      1450    2   7   0   6 23560.20 25331.80   372.46 o
      1450    1 -10   0   6 23560.20 25331.80   372.46 o
      1451    2   6   0   6  4535.77  4854.30    81.32 o
      1451    1  -9   0   6  4535.77  4854.30    81.32 o
      1452    2   5   0   6  2395.97  2472.22    35.67 o
      1452    1  -8   0   6  2395.97  2472.22    35.67 o
      1453    2   4   0   6  1686.45  2057.95    30.30 o
      1453    1  -7   0   6  1686.45  2057.95    30.30 o
      1454    2   3   0   6  1208.66  1292.69    19.95 o
      1454    1  -6   0   6  1208.66  1292.69    19.95 o
      1455    2   2   0   6   180.97   249.72    12.66 o
      1455    1  -5   0   6   180.97   249.72    12.66 o
      1456    2   1   0   6  2167.45  2176.86    31.45 o
      1456    1  -4   0   6  2167.45  2176.86    31.45 o
      1457    2   0   0   6  6279.30  6745.39    71.73 o
      1457    1  -3   0   6  6279.30  6745.39    71.73 o
      1458    2  -1   0   6 26242.80 29316.80   300.35 o
      1458    1  -2   0   6 26242.80 29316.80   300.35 o
      1459    2  -2   0   6 20786.40 23263.10   237.44 o
      1459    1  -1   0   6 20786.40 23263.10   237.44 o
      1460    2  -3   0   6  1322.75  1519.39    18.80 o
      1460    1   0   0   6  1322.75  1519.39    18.80 o
      1461    2  -4   0   6   122.93    23.40     6.14 o
      1461    1   1   0   6   122.93    23.40     6.14 o
      1462    2  -5   0   6    59.32    60.22     6.14 o
      1462    1   2   0   6    59.32    60.22     6.14 o
      1463    2  -6   0   6    70.85   149.22    12.66 o
      1463    1   3   0   6    70.85   149.22    12.66 o
      1464    2  -7   0   6  4950.43  5309.62    52.17 o
      1464    1   4   0   6  4950.43  5309.62    52.17 o
      1465    2  -8   0   6  6866.82  6784.52    66.74 o
      1465    1   5   0   6  6866.82  6784.52    66.74 o
      1466    2  -9   0   6 20449.30 20131.10   189.49 o
      1466    1   6   0   6 20449.30 20131.10   189.49 o
      1467    2 -10   0   6 25826.20 26094.70   244.73 o
      1467    1   7   0   6 25826.20 26094.70   244.73 o
      1468    2 -11   0   6  8397.01  8308.51    82.47 o
      1468    1   8   0   6  8397.01  8308.51    82.47 o
      1469    2 -12   0   6  2221.30  2257.41    28.00 o
      1469    1   9   0   6  2221.30  2257.41    28.00 o
      1470    2 -13   0   6   218.63   266.59     9.97 o
      1470    1  10   0   6   218.63   266.59     9.97 o
      1471    2 -14   0   6     8.47     3.45     5.37 <
      1471    1  11   0   6     8.47     3.45     5.37 <
      1472    2 -15   0   6   111.25   110.86     8.06 o
      1472    1  12   0   6   111.25   110.86     8.06 o
      1473    2 -16   0   6   114.02    85.16     9.21 o
      1473    1  13   0   6   114.02    85.16     9.21 o
      1474    2 -17   0   6  1888.52  1729.98    30.30 o
      1474    1  14   0   6  1888.52  1729.98    30.30 o
      1475    2 -18   0   6  1577.05  1492.92    28.77 o
      1475    1  15   0   6  1577.05  1492.92    28.77 o
      1476    2 -19   0   6  2056.64  1934.82    34.14 o
      1476    1  16   0   6  2056.64  1934.82    34.14 o
      1477    2 -20   0   6  1323.16  1308.03    34.14 o
      1477    1  17   0   6  1323.16  1308.03    34.14 o
      1478    2 -21   0   6   230.96   334.11    50.63 o
      1478    1  18   0   6   230.96   334.11    50.63 o
      1479    2 -22   0   6    67.61    37.21    36.06 <
      1479    1  19   0   6    67.61    37.21    36.06 <
      1480    2 -23   0   6    29.83    40.28    40.28 <
      1480    1  20   0   6    29.83    40.28    40.28 <
      1481    2  20  -1   6     7.31   -28.39    20.71 <
      1481    1 -23   1   6     7.31   -28.39    20.71 <
      1482    2  19  -1   6    20.23    16.88    23.40 <
      1482    1 -22   1   6    20.23    16.88    23.40 <
      1483    2  18  -1   6     4.29   -32.22    20.33 <
      1483    1 -21   1   6     4.29   -32.22    20.33 <
      1484    2  17  -1   6     2.94    10.74    21.48 <
      1484    1 -20   1   6     2.94    10.74    21.48 <
      1485    2  16  -1   6    27.41    50.63    19.95 <
      1485    1 -19   1   6    27.41    50.63    19.95 <
      1486    2  15  -1   6   113.13    91.68    21.10 o
      1486    1 -18   1   6   113.13    91.68    21.10 o
      1487    2  14  -1   6     1.66    -8.06    15.73 <
      1487    1 -17   1   6     1.66    -8.06    15.73 <
      1488    2  13  -1   6     1.55    -3.84    12.27 <
      1488    1 -16   1   6     1.55    -3.84    12.27 <
      1489    2  12  -1   6   296.56   276.18    16.11 o
      1489    1 -15   1   6   296.56   276.18    16.11 o
      1490    2  11  -1   6   456.67   413.89    15.34 o
      1490    1 -14   1   6   456.67   413.89    15.34 o
      1491    2  10  -1   6    27.87    16.11     7.67 <
      1491    1 -13   1   6    27.87    16.11     7.67 <
      1492    2   9  -1   6  1197.50  1190.27    22.63 o
      1492    1 -12   1   6  1197.50  1190.27    22.63 o
      1493    2   8  -1   6   569.64   532.80    13.81 o
      1493    1 -11   1   6   569.64   532.80    13.81 o
      1494    2   7  -1   6   205.86   206.37     6.90 o
      1494    1 -10   1   6   205.86   206.37     6.90 o
      1495    2   6  -1   6   100.72   102.42     6.52 o
      1495    1  -9   1   6   100.72   102.42     6.52 o
      1496    2   5  -1   6    50.42    67.89     6.14 o
      1496    1  -8   1   6    50.42    67.89     6.14 o
      1497    2   4  -1   6   151.53   194.48     8.82 o
      1497    1  -7   1   6   151.53   194.48     8.82 o
      1498    2   3  -1   6   996.29  1122.76    18.03 o
      1498    1  -6   1   6   996.29  1122.76    18.03 o
      1499    2   2  -1   6  4424.01  4853.54    42.96 o
      1499    1  -5   1   6  4424.01  4853.54    42.96 o
      1500    2   1  -1   6  2331.44  2566.20    21.10 o
      1500    1  -4   1   6  2331.44  2566.20    21.10 o
      1501    2   0  -1   6  1278.34  1395.88    14.19 o
      1501    1  -3   1   6  1278.34  1395.88    14.19 o
      1502    2  -1  -1   6    54.14    42.19     3.84 o
      1502    1  -2   1   6    54.14    42.19     3.84 o
      1503    2  -2  -1   6   511.07   599.93    10.36 o
      1503    1  -1   1   6   511.07   599.93    10.36 o
      1504    2  -3  -1   6  3297.51  3725.02    42.96 o
      1504    1   0   1   6  3297.51  3725.02    42.96 o
      1505    2  -4  -1   6  4461.41  5029.60    43.35 o
      1505    1   1   1   6  4461.41  5029.60    43.35 o
      1506    2  -5  -1   6  7758.51  8336.13    68.28 o
      1506    1   2   1   6  7758.51  8336.13    68.28 o
      1507    2  -6  -1   6  1392.00  1401.63    17.65 o
      1507    1   3   1   6  1392.00  1401.63    17.65 o
      1508    2  -7  -1   6   128.29   166.09     8.44 o
      1508    1   4   1   6   128.29   166.09     8.44 o
      1509    2  -8  -1   6    15.76    14.19     5.37 <
      1509    1   5   1   6    15.76    14.19     5.37 <
      1510    2  -9  -1   6    70.17    79.02     6.14 o
      1510    1   6   1   6    70.17    79.02     6.14 o
      1511    2 -10  -1   6   403.69   393.18     8.44 o
      1511    1   7   1   6   403.69   393.18     8.44 o
      1512    2 -11  -1   6   832.16   796.33    11.89 o
      1512    1   8   1   6   832.16   796.33    11.89 o
      1513    2 -12  -1   6    46.76    15.34     6.14 <
      1513    1   9   1   6    46.76    15.34     6.14 <
      1514    2 -13  -1   6     8.45     3.45     4.99 <
      1514    1  10   1   6     8.45     3.45     4.99 <
      1515    2 -14  -1   6   108.61   109.32     6.90 o
      1515    1  11   1   6   108.61   109.32     6.90 o
      1516    2 -15  -1   6    67.92    57.15     6.90 o
      1516    1  12   1   6    67.92    57.15     6.90 o
      1517    2 -16  -1   6     5.72    -0.38     6.14 <
      1517    1  13   1   6     5.72    -0.38     6.14 <
      1518    2 -17  -1   6    14.17     6.52     7.67 <
      1518    1  14   1   6    14.17     6.52     7.67 <
      1519    2 -18  -1   6    36.26    18.80     9.59 <
      1519    1  15   1   6    36.26    18.80     9.59 <
      1520    2 -19  -1   6    22.88     7.29    10.36 <
      1520    1  16   1   6    22.88     7.29    10.36 <
      1521    2 -20  -1   6    19.87    21.86    11.51 <
      1521    1  17   1   6    19.87    21.86    11.51 <
      1522    2 -21  -1   6     0.17    -6.14    10.74 <
      1522    1  18   1   6     0.17    -6.14    10.74 <
      1523    2 -22  -1   6    18.76     6.14    14.96 <
      1523    1  19   1   6    18.76     6.14    14.96 <
      1524    2 -23  -1   6     7.42    -0.38    14.58 <
      1524    1  20   1   6     7.42    -0.38    14.58 <
      1525    2  19  -2   6     0.85   -13.04    18.41 <
      1525    1 -22   2   6     0.85   -13.04    18.41 <
      1526    2  18  -2   6   159.66   149.98    28.77 o
      1526    1 -21   2   6   159.66   149.98    28.77 o
      1527    2  17  -2   6    47.60    27.23    22.63 <
      1527    1 -20   2   6    47.60    27.23    22.63 <
      1528    2  16  -2   6   213.01   232.07    26.85 o
      1528    1 -19   2   6   213.01   232.07    26.85 o
      1529    2  15  -2   6   234.59   228.62    19.56 o
      1529    1 -18   2   6   234.59   228.62    19.56 o
      1530    2  14  -2   6   420.62   414.66    18.80 o
      1530    1 -17   2   6   420.62   414.66    18.80 o
      1531    2  13  -2   6  1037.37  1015.74    31.45 o
      1531    1 -16   2   6  1037.37  1015.74    31.45 o
      1532    2  12  -2   6   131.48   121.60    15.34 o
      1532    1 -15   2   6   131.48   121.60    15.34 o
      1533    2  11  -2   6  1190.96  1125.83    25.70 o
      1533    1 -14   2   6  1190.96  1125.83    25.70 o
      1534    2  10  -2   6  1159.41  1062.54    24.17 o
      1534    1 -13   2   6  1159.41  1062.54    24.17 o
      1535    2   9  -2   6   180.52   195.25    12.27 o
      1535    1 -12   2   6   180.52   195.25    12.27 o
      1536    2   8  -2   6   982.78   979.30    21.86 o
      1536    1 -11   2   6   982.78   979.30    21.86 o
      1537    2   7  -2   6   156.96   168.40     8.82 o
      1537    1 -10   2   6   156.96   168.40     8.82 o
      1538    2   6  -2   6    69.61    75.57     6.14 o
      1538    1  -9   2   6    69.61    75.57     6.14 o
      1539    2   5  -2   6   290.17   275.80     8.44 o
      1539    1  -8   2   6   290.17   275.80     8.44 o
      1540    2   4  -2   6  1281.73  1220.96    16.49 o
      1540    1  -7   2   6  1281.73  1220.96    16.49 o
      1541    2   3  -2   6  2118.58  1851.19    20.71 o
      1541    1  -6   2   6  2118.58  1851.19    20.71 o
      1542    2   2  -2   6  3007.66  2713.12    26.08 o
      1542    1  -5   2   6  3007.66  2713.12    26.08 o
      1543    2   1  -2   6  8500.66  8321.17    62.14 o
      1543    1  -4   2   6  8500.66  8321.17    62.14 o
      1544    2   0  -2   6  8632.67  8372.19    66.74 o
      1544    1  -3   2   6  8632.67  8372.19    66.74 o
      1545    2  -1  -2   6  8128.73  7898.84    63.29 o
      1545    1  -2   2   6  8128.73  7898.84    63.29 o
      1546    2  -2  -2   6  5279.21  4943.30    45.26 o
      1546    1  -1   2   6  5279.21  4943.30    45.26 o
      1547    2  -3  -2   6  6168.78  6013.51    54.09 o
      1547    1   0   2   6  6168.78  6013.51    54.09 o
      1548    2  -4  -2   6 10064.20 10336.20   104.72 o
      1548    1   1   2   6 10064.20 10336.20   104.72 o
      1549    2  -5  -2   6  2369.75  2144.26    28.77 o
      1549    1   2   2   6  2369.75  2144.26    28.77 o
      1550    2  -6  -2   6  2121.42  2009.62    28.39 o
      1550    1   3   2   6  2121.42  2009.62    28.39 o
      1551    2  -7  -2   6  3020.31  2960.91    40.28 o
      1551    1   4   2   6  3020.31  2960.91    40.28 o
      1552    2  -8  -2   6  1382.02  1229.02    22.25 o
      1552    1   5   2   6  1382.02  1229.02    22.25 o
      1553    2  -9  -2   6   562.95   520.53    15.73 o
      1553    1   6   2   6   562.95   520.53    15.73 o
      1554    2 -10  -2   6   622.23   566.18    16.88 o
      1554    1   7   2   6   622.23   566.18    16.88 o
      1555    2 -11  -2   6  1359.94  1273.90    23.40 o
      1555    1   8   2   6  1359.94  1273.90    23.40 o
      1556    2 -12  -2   6   989.74   980.07    19.18 o
      1556    1   9   2   6   989.74   980.07    19.18 o
      1557    2 -13  -2   6  2312.08  2158.45    28.00 o
      1557    1  10   2   6  2312.08  2158.45    28.00 o
      1558    2 -14  -2   6  1485.34  1415.82    24.93 o
      1558    1  11   2   6  1485.34  1415.82    24.93 o
      1559    2 -15  -2   6  1414.08  1334.89    24.55 o
      1559    1  12   2   6  1414.08  1334.89    24.55 o
      1560    2 -16  -2   6  2083.14  2045.67    32.60 o
      1560    1  13   2   6  2083.14  2045.67    32.60 o
      1561    2 -17  -2   6   865.42   822.03    21.10 o
      1561    1  14   2   6   865.42   822.03    21.10 o
      1562    2 -18  -2   6   751.02   741.86    26.08 o
      1562    1  15   2   6   751.02   741.86    26.08 o
      1563    2 -19  -2   6   189.94   143.85    18.80 o
      1563    1  16   2   6   189.94   143.85    18.80 o
      1564    2 -20  -2   6   280.50   255.09    21.48 o
      1564    1  17   2   6   280.50   255.09    21.48 o
      1565    2 -21  -2   6   320.13   333.34    24.55 o
      1565    1  18   2   6   320.13   333.34    24.55 o
      1566    2 -22  -2   6     6.73    19.95    15.34 <
      1566    1  19   2   6     6.73    19.95    15.34 <
      1567    2  18  -3   6   577.50   500.58    26.08 o
      1567    1 -21   3   6   577.50   500.58    26.08 o
      1568    2  17  -3   6   430.83   375.15    24.55 o
      1568    1 -20   3   6   430.83   375.15    24.55 o
      1569    2  16  -3   6    31.33    13.04    13.43 <
      1569    1 -19   3   6    31.33    13.04    13.43 <
      1570    2  15  -3   6    80.99    89.76    13.04 o
      1570    1 -18   3   6    80.99    89.76    13.04 o
      1571    2  14  -3   6   102.88    94.36    13.04 o
      1571    1 -17   3   6   102.88    94.36    13.04 o
      1572    2  13  -3   6    67.78    77.48    14.19 o
      1572    1 -16   3   6    67.78    77.48    14.19 o
      1573    2  12  -3   6    91.49    85.16    14.19 o
      1573    1 -15   3   6    91.49    85.16    14.19 o
      1574    2  11  -3   6   195.38   196.78    13.43 o
      1574    1 -14   3   6   195.38   196.78    13.43 o
      1575    2  10  -3   6  1114.70  1009.60    24.55 o
      1575    1 -13   3   6  1114.70  1009.60    24.55 o
      1576    2   9  -3   6   230.25   255.09    15.34 o
      1576    1 -12   3   6   230.25   255.09    15.34 o
      1577    2   8  -3   6   404.94   369.01    15.73 o
      1577    1 -11   3   6   404.94   369.01    15.73 o
      1578    2   7  -3   6    32.80    30.30     7.67 o
      1578    1 -10   3   6    32.80    30.30     7.67 o
      1579    2   6  -3   6   707.20   720.38    15.73 o
      1579    1  -9   3   6   707.20   720.38    15.73 o
      1580    2   5  -3   6    16.33     7.67     5.37 <
      1580    1  -8   3   6    16.33     7.67     5.37 <
      1581    2   4  -3   6   250.84   237.82     8.44 o
      1581    1  -7   3   6   250.84   237.82     8.44 o
      1582    2   3  -3   6  1238.61  1235.92    15.34 o
      1582    1  -6   3   6  1238.61  1235.92    15.34 o
      1583    2   2  -3   6  3263.31  3072.54    27.62 o
      1583    1  -5   3   6  3263.31  3072.54    27.62 o
      1584    2   1  -3   6  6551.80  6199.93    49.87 o
      1584    1  -4   3   6  6551.80  6199.93    49.87 o
      1585    2   0  -3   6  3836.08  3575.42    34.52 o
      1585    1  -3   3   6  3836.08  3575.42    34.52 o
      1586    2  -1  -3   6     3.64    -0.77     5.75 <
      1586    1  -2   3   6     3.64    -0.77     5.75 <
      1587    2  -2  -3   6    63.42    64.06     6.90 o
      1587    1  -1   3   6    63.42    64.06     6.90 o
      1588    2  -3  -3   6  1076.11   982.75    16.11 o
      1588    1   0   3   6  1076.11   982.75    16.11 o
      1589    2  -4  -3   6  2710.48  2579.63    43.73 o
      1589    1   1   3   6  2710.48  2579.63    43.73 o
      1590    2  -5  -3   6   747.18   743.01    25.32 o
      1590    1   2   3   6   747.18   743.01    25.32 o
      1591    2  -6  -3   6   214.97   163.41    14.19 o
      1591    1   3   3   6   214.97   163.41    14.19 o
      1592    2  -7  -3   6  1202.12  1220.19    34.14 o
      1592    1   4   3   6  1202.12  1220.19    34.14 o
      1593    2  -8  -3   6   433.04   406.22    21.86 o
      1593    1   5   3   6   433.04   406.22    21.86 o
      1594    2  -9  -3   6   977.76   976.61    28.39 o
      1594    1   6   3   6   977.76   976.61    28.39 o
      1595    2 -10  -3   6    11.47    16.88    12.66 <
      1595    1   7   3   6    11.47    16.88    12.66 <
      1596    2 -11  -3   6   265.91   240.13    24.17 o
      1596    1   8   3   6   265.91   240.13    24.17 o
      1597    2 -12  -3   6    59.94    52.94    10.74 o
      1597    1   9   3   6    59.94    52.94    10.74 o
      1598    2 -13  -3   6   160.18   139.63    13.81 o
      1598    1  10   3   6   160.18   139.63    13.81 o
      1599    2 -14  -3   6    57.63    59.84    11.89 o
      1599    1  11   3   6    57.63    59.84    11.89 o
      1600    2 -15  -3   6   307.46   302.27    16.49 o
      1600    1  12   3   6   307.46   302.27    16.49 o
      1601    2 -16  -3   6   584.32   532.80    20.33 o
      1601    1  13   3   6   584.32   532.80    20.33 o
      1602    2 -17  -3   6    90.46   108.17    13.43 o
      1602    1  14   3   6    90.46   108.17    13.43 o
      1603    2 -18  -3   6    21.44    37.21    15.34 <
      1603    1  15   3   6    21.44    37.21    15.34 <
      1604    2 -19  -3   6    64.22    76.72    16.49 o
      1604    1  16   3   6    64.22    76.72    16.49 o
      1605    2 -20  -3   6   449.74   420.03    28.77 o
      1605    1  17   3   6   449.74   420.03    28.77 o
      1606    2 -21  -3   6   254.93   268.89    26.47 o
      1606    1  18   3   6   254.93   268.89    26.47 o
      1607    2  16  -4   6     9.53    13.43    21.48 <
      1607    1 -19   4   6     9.53    13.43    21.48 <
      1608    2  15  -4   6     2.14    27.23    20.33 <
      1608    1 -18   4   6     2.14    27.23    20.33 <
      1609    2  14  -4   6    81.49    95.51    13.04 o
      1609    1 -17   4   6    81.49    95.51    13.04 o
      1610    2  13  -4   6     8.22     3.07     9.97 <
      1610    1 -16   4   6     8.22     3.07     9.97 <
      1611    2  12  -4   6   324.95   303.03    21.86 o
      1611    1 -15   4   6   324.95   303.03    21.86 o
      1612    2  11  -4   6   130.72   137.32    15.34 o
      1612    1 -14   4   6   130.72   137.32    15.34 o
      1613    2  10  -4   6    73.16    44.11    10.74 o
      1613    1 -13   4   6    73.16    44.11    10.74 o
      1614    2   9  -4   6   346.80   304.57    16.49 o
      1614    1 -12   4   6   346.80   304.57    16.49 o
      1615    2   8  -4   6   108.45   108.17    11.89 o
      1615    1 -11   4   6   108.45   108.17    11.89 o
      1616    2   7  -4   6   782.55   702.35    21.86 o
      1616    1 -10   4   6   782.55   702.35    21.86 o
      1617    2   6  -4   6   908.94   849.65    19.95 o
      1617    1  -9   4   6   908.94   849.65    19.95 o
      1618    2   5  -4   6  1687.53  1591.12    23.40 o
      1618    1  -8   4   6  1687.53  1591.12    23.40 o
      1619    2   4  -4   6  2199.09  2101.68    27.62 o
      1619    1  -7   4   6  2199.09  2101.68    27.62 o
      1620    2   3  -4   6  1138.35  1122.38    21.10 o
      1620    1  -6   4   6  1138.35  1122.38    21.10 o
      1621    2   2  -4   6  1014.29   969.33    17.65 o
      1621    1  -5   4   6  1014.29   969.33    17.65 o
      1622    2   1  -4   6   186.73   163.41     9.59 o
      1622    1  -4   4   6   186.73   163.41     9.59 o
      1623    2   0  -4   6   240.35   238.59    11.12 o
      1623    1  -3   4   6   240.35   238.59    11.12 o
      1624    2  -1  -4   6    46.95    38.74     7.29 o
      1624    1  -2   4   6    46.95    38.74     7.29 o
      1625    2  -2  -4   6    87.80    73.27     8.44 o
      1625    1  -1   4   6    87.80    73.27     8.44 o
      1626    2  -3  -4   6  1006.73   977.77    18.03 o
      1626    1   0   4   6  1006.73   977.77    18.03 o
      1627    2  -4  -4   6   814.97   795.56    18.41 o
      1627    1   1   4   6   814.97   795.56    18.41 o
      1628    2  -5  -4   6  1642.17  1670.14    26.47 o
      1628    1   2   4   6  1642.17  1670.14    26.47 o
      1629    2  -6  -4   6  1744.06  1699.68    29.92 o
      1629    1   3   4   6  1744.06  1699.68    29.92 o
      1630    2  -7  -4   6  1808.93  1696.61    24.55 o
      1630    1   4   4   6  1808.93  1696.61    24.55 o
      1631    2  -8  -4   6  1272.83  1193.73    21.10 o
      1631    1   5   4   6  1272.83  1193.73    21.10 o
      1632    2  -9  -4   6   927.37   893.76    18.41 o
      1632    1   6   4   6   927.37   893.76    18.41 o
      1633    2 -10  -4   6  1288.27  1256.63    25.32 o
      1633    1   7   4   6  1288.27  1256.63    25.32 o
      1634    2 -11  -4   6   440.12   430.39    16.11 o
      1634    1   8   4   6   440.12   430.39    16.11 o
      1635    2 -12  -4   6   983.12   928.67    22.63 o
      1635    1   9   4   6   983.12   928.67    22.63 o
      1636    2 -13  -4   6   697.99   681.25    19.56 o
      1636    1  10   4   6   697.99   681.25    19.56 o
      1637    2 -14  -4   6   263.80   232.07    14.58 o
      1637    1  11   4   6   263.80   232.07    14.58 o
      1638    2 -15  -4   6   336.52   275.03    16.11 o
      1638    1  12   4   6   336.52   275.03    16.11 o
      1639    2 -16  -4   6   107.14    99.35    12.66 o
      1639    1  13   4   6   107.14    99.35    12.66 o
      1640    2 -17  -4   6    96.65   107.79    16.88 o
      1640    1  14   4   6    96.65   107.79    16.88 o
      1641    2 -18  -4   6    34.11    42.58    15.34 <
      1641    1  15   4   6    34.11    42.58    15.34 <
      1642    2 -19  -4   6   164.17   189.11    22.25 o
      1642    1  16   4   6   164.17   189.11    22.25 o
      1643    2 -20  -4   6   215.87   139.24    25.32 o
      1643    1  17   4   6   215.87   139.24    25.32 o
      1644    2  14  -5   6   193.10   162.26    37.59 o
      1644    1 -17   5   6   193.10   162.26    37.59 o
      1645    2  13  -5   6   229.98   213.27    37.21 o
      1645    1 -16   5   6   229.98   213.27    37.21 o
      1646    2  12  -5   6   132.39   176.83    26.85 o
      1646    1 -15   5   6   132.39   176.83    26.85 o
      1647    2  11  -5   6   633.03   582.29    38.74 o
      1647    1 -14   5   6   633.03   582.29    38.74 o
      1648    2  10  -5   6   202.92   157.27    18.03 o
      1648    1 -13   5   6   202.92   157.27    18.03 o
      1649    2   9  -5   6   266.69   265.06    21.10 o
      1649    1 -12   5   6   266.69   265.06    21.10 o
      1650    2   8  -5   6   529.77   472.58    24.93 o
      1650    1 -11   5   6   529.77   472.58    24.93 o
      1651    2   7  -5   6   322.66   283.09    20.71 o
      1651    1 -10   5   6   322.66   283.09    20.71 o
      1652    2   6  -5   6   344.91   342.16    26.08 o
      1652    1  -9   5   6   344.91   342.16    26.08 o
      1653    2   5  -5   6   308.44   283.86    23.78 o
      1653    1  -8   5   6   308.44   283.86    23.78 o
      1654    2   4  -5   6   360.16   364.02    21.48 o
      1654    1  -7   5   6   360.16   364.02    21.48 o
      1655    2   3  -5   6    24.16    23.02     9.59 <
      1655    1  -6   5   6    24.16    23.02     9.59 <
      1656    2   2  -5   6    12.43     4.60     8.82 <
      1656    1  -5   5   6    12.43     4.60     8.82 <
      1657    2   1  -5   6    62.01    52.55    10.36 o
      1657    1  -4   5   6    62.01    52.55    10.36 o
      1658    2   0  -5   6    51.44    31.07     8.06 o
      1658    1  -3   5   6    51.44    31.07     8.06 o
      1659    2  -1  -5   6    87.03    84.77    13.81 o
      1659    1  -2   5   6    87.03    84.77    13.81 o
      1660    2  -2  -5   6   217.76   197.93    14.19 o
      1660    1  -1   5   6   217.76   197.93    14.19 o
      1661    2  -3  -5   6  1049.49   983.14    24.17 o
      1661    1   0   5   6  1049.49   983.14    24.17 o
      1662    2  -4  -5   6   693.96   658.24    17.26 o
      1662    1   1   5   6   693.96   658.24    17.26 o
      1663    2  -5  -5   6   186.65   194.10    11.51 o
      1663    1   2   5   6   186.65   194.10    11.51 o
      1664    2  -6  -5   6   600.16   568.86    16.11 o
      1664    1   3   5   6   600.16   568.86    16.11 o
      1665    2  -7  -5   6   126.63   112.01    10.36 o
      1665    1   4   5   6   126.63   112.01    10.36 o
      1666    2  -8  -5   6    22.50    24.17     8.44 <
      1666    1   5   5   6    22.50    24.17     8.44 <
      1667    2  -9  -5   6    22.06    10.36     9.97 <
      1667    1   6   5   6    22.06    10.36     9.97 <
      1668    2 -10  -5   6    26.43     8.06     9.59 <
      1668    1   7   5   6    26.43     8.06     9.59 <
      1669    2 -11  -5   6    24.19     8.82     9.97 <
      1669    1   8   5   6    24.19     8.82     9.97 <
      1670    2 -12  -5   6    11.02    -9.59     9.21 <
      1670    1   9   5   6    11.02    -9.59     9.21 <
      1671    2 -13  -5   6    34.50    18.80    11.12 <
      1671    1  10   5   6    34.50    18.80    11.12 <
      1672    2 -14  -5   6    55.49    64.06    12.27 o
      1672    1  11   5   6    55.49    64.06    12.27 o
      1673    2 -15  -5   6     7.02    -0.77    13.81 <
      1673    1  12   5   6     7.02    -0.77    13.81 <
      1674    2 -16  -5   6     8.61    25.32    15.73 <
      1674    1  13   5   6     8.61    25.32    15.73 <
      1675    2 -17  -5   6    30.58    24.55    16.49 <
      1675    1  14   5   6    30.58    24.55    16.49 <
      1676    2  11  -6   6   358.83   340.63    46.03 o
      1676    1 -14   6   6   358.83   340.63    46.03 o
      1677    2  10  -6   6    52.18    56.77    30.30 <
      1677    1 -13   6   6    52.18    56.77    30.30 <
      1678    2   9  -6   6    23.48    37.59    28.77 <
      1678    1 -12   6   6    23.48    37.59    28.77 <
      1679    2   8  -6   6    62.14   121.60    33.76 o
      1679    1 -11   6   6    62.14   121.60    33.76 o
      1680    2   7  -6   6   254.10   231.69    25.70 o
      1680    1 -10   6   6   254.10   231.69    25.70 o
      1681    2   6  -6   6    24.77    42.96    19.56 <
      1681    1  -9   6   6    24.77    42.96    19.56 <
      1682    2   5  -6   6    86.89   105.87    21.48 o
      1682    1  -8   6   6    86.89   105.87    21.48 o
      1683    2   4  -6   6   443.53   459.54    32.22 o
      1683    1  -7   6   6   443.53   459.54    32.22 o
      1684    2   3  -6   6   865.03   851.18    32.99 o
      1684    1  -6   6   6   865.03   851.18    32.99 o
      1685    2   2  -6   6   530.41   579.60    25.32 o
      1685    1  -5   6   6   530.41   579.60    25.32 o
      1686    2   1  -6   6   387.03   406.99    20.33 o
      1686    1  -4   6   6   387.03   406.99    20.33 o
      1687    2   0  -6   6    14.80    17.65     9.97 <
      1687    1  -3   6   6    14.80    17.65     9.97 <
      1688    2  -1  -6   6    47.03    42.19    10.74 o
      1688    1  -2   6   6    47.03    42.19    10.74 o
      1689    2  -2  -6   6   174.19   173.00    14.19 o
      1689    1  -1   6   6   174.19   173.00    14.19 o
      1690    2  -3  -6   6   110.39    95.13    12.27 o
      1690    1   0   6   6   110.39    95.13    12.27 o
      1691    2  -4  -6   6   373.61   362.11    19.18 o
      1691    1   1   6   6   373.61   362.11    19.18 o
      1692    2  -5  -6   6  1370.89  1273.51    30.30 o
      1692    1   2   6   6  1370.89  1273.51    30.30 o
      1693    2  -6  -6   6  1252.88  1178.38    29.54 o
      1693    1   3   6   6  1252.88  1178.38    29.54 o
      1694    2  -7  -6   6   124.20   151.13    21.48 o
      1694    1   4   6   6   124.20   151.13    21.48 o
      1695    2  -8  -6   6    13.93    31.07    17.26 <
      1695    1   5   6   6    13.93    31.07    17.26 <
      1696    2  -9  -6   6    18.41    24.17    18.03 <
      1696    1   6   6   6    18.41    24.17    18.03 <
      1697    2 -10  -6   6    88.02   111.24    20.71 o
      1697    1   7   6   6    88.02   111.24    20.71 o
      1698    2 -11  -6   6    20.64    72.11    19.56 o
      1698    1   8   6   6    20.64    72.11    19.56 o
      1699    2 -12  -6   6    66.48    67.13    19.56 o
      1699    1   9   6   6    66.48    67.13    19.56 o
      1700    2 -13  -6   6   673.93   723.06    39.51 o
      1700    1  10   6   6   673.93   723.06    39.51 o
      1701    2 -14  -6   6   662.97   692.38    39.89 o
      1701    1  11   6   6   662.97   692.38    39.89 o
      1702    2   4  -7   6   227.14   239.74    46.80 o
      1702    1  -7   7   6   227.14   239.74    46.80 o
      1703    2   3  -7   6   203.30   208.67    44.11 o
      1703    1  -6   7   6   203.30   208.67    44.11 o
      1704    2   2  -7   6   146.43   141.93    39.89 o
      1704    1  -5   7   6   146.43   141.93    39.89 o
      1705    2   1  -7   6    10.33    51.40    20.71 <
      1705    1  -4   7   6    10.33    51.40    20.71 <
      1706    2   0  -7   6   136.83   155.35    18.80 o
      1706    1  -3   7   6   136.83   155.35    18.80 o
      1707    2  -1  -7   6   266.06   296.90    22.63 o
      1707    1  -2   7   6   266.06   296.90    22.63 o
      1708    2  -2  -7   6   182.66   187.19    19.56 o
      1708    1  -1   7   6   182.66   187.19    19.56 o
      1709    2  -3  -7   6   132.61   123.51    23.02 o
      1709    1   0   7   6   132.61   123.51    23.02 o
      1710    2  -4  -7   6   111.38   130.42    17.65 o
      1710    1   1   7   6   111.38   130.42    17.65 o
      1711    2  -5  -7   6    56.80    86.31    19.95 o
      1711    1   2   7   6    56.80    86.31    19.95 o
      1712    2  -6  -7   6    24.31    32.60    17.26 <
      1712    1   3   7   6    24.31    32.60    17.26 <
      1713    2  -7  -7   6    98.57   116.61    21.10 o
      1713    1   4   7   6    98.57   116.61    21.10 o
      1714    2  -8  -7   6    26.34    53.32    18.03 <
      1714    1   5   7   6    26.34    53.32    18.03 <
      1715    2  20  -1   7   134.44   123.51    28.77 o
      1715    1 -23   1   7   134.44   123.51    28.77 o
      1716    2  19  -1   7   496.58   495.21    39.13 o
      1716    1 -22   1   7   496.58   495.21    39.13 o
      1717    2  18  -1   7   466.84   513.24    37.59 o
      1717    1 -21   1   7   466.84   513.24    37.59 o
      1718    2  17  -1   7   377.30   380.90    32.22 o
      1718    1 -20   1   7   377.30   380.90    32.22 o
      1719    2  16  -1   7   170.25   144.61    23.02 o
      1719    1 -19   1   7   170.25   144.61    23.02 o
      1720    2  15  -1   7    58.91    40.28    19.18 <
      1720    1 -18   1   7    58.91    40.28    19.18 <
      1721    2  14  -1   7    35.69    40.28    17.65 <
      1721    1 -17   1   7    35.69    40.28    17.65 <
      1722    2  13  -1   7    42.79    18.03    11.12 <
      1722    1 -16   1   7    42.79    18.03    11.12 <
      1723    2  12  -1   7   420.82   431.15    20.71 o
      1723    1 -15   1   7   420.82   431.15    20.71 o
      1724    2  11  -1   7  1583.09  1618.36    32.99 o
      1724    1 -14   1   7  1583.09  1618.36    32.99 o
      1725    2  10  -1   7   397.58   453.40    15.73 o
      1725    1 -13   1   7   397.58   453.40    15.73 o
      1726    2   9  -1   7  1280.82  1342.94    24.55 o
      1726    1 -12   1   7  1280.82  1342.94    24.55 o
      1727    2   8  -1   7  1588.20  1561.97    24.93 o
      1727    1 -11   1   7  1588.20  1561.97    24.93 o
      1728    2   7  -1   7    40.45    20.33     6.90 <
      1728    1 -10   1   7    40.45    20.33     6.90 <
      1729    2   6  -1   7   167.49   190.26     9.97 o
      1729    1  -9   1   7   167.49   190.26     9.97 o
      1730    2   5  -1   7    21.74     9.97     4.60 <
      1730    1  -8   1   7    21.74     9.97     4.60 <
      1731    2   4  -1   7   152.98   219.80     8.82 o
      1731    1  -7   1   7   152.98   219.80     8.82 o
      1732    2   3  -1   7   151.84   168.40     7.29 o
      1732    1  -6   1   7   151.84   168.40     7.29 o
      1733    2   2  -1   7  1183.83  1316.09    14.58 o
      1733    1  -5   1   7  1183.83  1316.09    14.58 o
      1734    2   1  -1   7  1151.33  1262.77    14.19 o
      1734    1  -4   1   7  1151.33  1262.77    14.19 o
      1735    2   0  -1   7   506.20   505.95     9.21 o
      1735    1  -3   1   7   506.20   505.95     9.21 o
      1736    2  -1  -1   7    50.81    19.18     3.45 o
      1736    1  -2   1   7    50.81    19.18     3.45 o
      1737    2  -2  -1   7  1246.13  1432.70    25.32 o
      1737    1  -1   1   7  1246.13  1432.70    25.32 o
      1738    2  -3  -1   7   536.14   538.56    13.04 o
      1738    1   0   1   7   536.14   538.56    13.04 o
      1739    2  -4  -1   7  1743.60  1797.88    20.33 o
      1739    1   1   1   7  1743.60  1797.88    20.33 o
      1740    2  -5  -1   7    80.00    64.83     6.90 o
      1740    1   2   1   7    80.00    64.83     6.90 o
      1741    2  -6  -1   7   186.81   229.00     8.82 o
      1741    1   3   1   7   186.81   229.00     8.82 o
      1742    2  -7  -1   7    10.71     2.69     5.37 <
      1742    1   4   1   7    10.71     2.69     5.37 <
      1743    2  -8  -1   7   563.57   582.67    13.81 o
      1743    1   5   1   7   563.57   582.67    13.81 o
      1744    2  -9  -1   7     6.57     8.44     4.99 <
      1744    1   6   1   7     6.57     8.44     4.99 <
      1745    2 -10  -1   7   971.41   922.91    12.27 o
      1745    1   7   1   7   971.41   922.91    12.27 o
      1746    2 -11  -1   7  1363.92  1328.36    15.73 o
      1746    1   8   1   7  1363.92  1328.36    15.73 o
      1747    2 -12  -1   7  1352.38  1366.34    16.49 o
      1747    1   9   1   7  1352.38  1366.34    16.49 o
      1748    2 -13  -1   7   782.14   798.63    13.81 o
      1748    1  10   1   7   782.14   798.63    13.81 o
      1749    2 -14  -1   7   469.10   534.72    12.66 o
      1749    1  11   1   7   469.10   534.72    12.66 o
      1750    2 -15  -1   7    51.62    51.02     6.52 o
      1750    1  12   1   7    51.62    51.02     6.52 o
      1751    2 -16  -1   7    41.42    34.14     6.90 o
      1751    1  13   1   7    41.42    34.14     6.90 o
      1752    2 -17  -1   7     2.44    -5.37     7.29 <
      1752    1  14   1   7     2.44    -5.37     7.29 <
      1753    2 -18  -1   7   123.92   107.02    11.89 o
      1753    1  15   1   7   123.92   107.02    11.89 o
      1754    2 -19  -1   7   238.14   245.50    15.73 o
      1754    1  16   1   7   238.14   245.50    15.73 o
      1755    2 -20  -1   7   266.58   252.40    16.49 o
      1755    1  17   1   7   266.58   252.40    16.49 o
      1756    2 -21  -1   7   671.08   668.21    23.78 o
      1756    1  18   1   7   671.08   668.21    23.78 o
      1757    2 -22  -1   7   307.77   331.80    21.86 o
      1757    1  19   1   7   307.77   331.80    21.86 o
      1758    2 -23  -1   7    19.88     6.90    14.58 <
      1758    1  20   1   7    19.88     6.90    14.58 <
      1759    2  19  -2   7     0.26   -47.95    23.02 <
      1759    1 -22   2   7     0.26   -47.95    23.02 <
      1760    2  18  -2   7    11.19    -1.15    24.55 <
      1760    1 -21   2   7    11.19    -1.15    24.55 <
      1761    2  17  -2   7   308.38   338.71    31.84 o
      1761    1 -20   2   7   308.38   338.71    31.84 o
      1762    2  16  -2   7   236.12   238.21    28.77 o
      1762    1 -19   2   7   236.12   238.21    28.77 o
      1763    2  15  -2   7   549.67   485.62    34.52 o
      1763    1 -18   2   7   549.67   485.62    34.52 o
      1764    2  14  -2   7   227.85   284.62    20.71 o
      1764    1 -17   2   7   227.85   284.62    20.71 o
      1765    2  13  -2   7    84.47   101.27    14.58 o
      1765    1 -16   2   7    84.47   101.27    14.58 o
      1766    2  12  -2   7    16.12    26.08    11.12 <
      1766    1 -15   2   7    16.12    26.08    11.12 <
      1767    2  11  -2   7    39.37    31.07     8.82 o
      1767    1 -14   2   7    39.37    31.07     8.82 o
      1768    2  10  -2   7     6.73    -0.77     7.29 <
      1768    1 -13   2   7     6.73    -0.77     7.29 <
      1769    2   9  -2   7   255.91   273.11    13.81 o
      1769    1 -12   2   7   255.91   273.11    13.81 o
      1770    2   8  -2   7  1122.15  1114.32    23.40 o
      1770    1 -11   2   7  1122.15  1114.32    23.40 o
      1771    2   7  -2   7  2688.29  2576.94    30.30 o
      1771    1 -10   2   7  2688.29  2576.94    30.30 o
      1772    2   6  -2   7  1690.16  1611.84    21.48 o
      1772    1  -9   2   7  1690.16  1611.84    21.48 o
      1773    2   5  -2   7   753.04   793.64    17.65 o
      1773    1  -8   2   7   753.04   793.64    17.65 o
      1774    2   4  -2   7    13.01     2.69     3.84 <
      1774    1  -7   2   7    13.01     2.69     3.84 <
      1775    2   3  -2   7     4.03    15.34     4.60 o
      1775    1  -6   2   7     4.03    15.34     4.60 o
      1776    2   2  -2   7    94.19    99.73     6.90 o
      1776    1  -5   2   7    94.19    99.73     6.90 o
      1777    2   1  -2   7   393.92   486.01    10.74 o
      1777    1  -4   2   7   393.92   486.01    10.74 o
      1778    2   0  -2   7  1358.46  1273.51    16.11 o
      1778    1  -3   2   7  1358.46  1273.51    16.11 o
      1779    2  -1  -2   7  2988.63  2956.31    26.85 o
      1779    1  -2   2   7  2988.63  2956.31    26.85 o
      1780    2  -2  -2   7  2490.90  2412.38    29.54 o
      1780    1  -1   2   7  2490.90  2412.38    29.54 o
      1781    2  -3  -2   7  1857.41  1736.50    24.17 o
      1781    1   0   2   7  1857.41  1736.50    24.17 o
      1782    2  -4  -2   7   421.85   378.22    12.66 o
      1782    1   1   2   7   421.85   378.22    12.66 o
      1783    2  -5  -2   7   105.23    77.10     8.82 o
      1783    1   2   2   7   105.23    77.10     8.82 o
      1784    2  -6  -2   7    10.30     5.75     6.90 <
      1784    1   3   2   7    10.30     5.75     6.90 <
      1785    2  -7  -2   7   190.99   242.43    11.51 o
      1785    1   4   2   7   190.99   242.43    11.51 o
      1786    2  -8  -2   7    40.75    21.86    11.51 <
      1786    1   5   2   7    40.75    21.86    11.51 <
      1787    2  -9  -2   7   961.99   928.67    17.65 o
      1787    1   6   2   7   961.99   928.67    17.65 o
      1788    2 -10  -2   7  2974.43  2756.85    36.44 o
      1788    1   7   2   7  2974.43  2756.85    36.44 o
      1789    2 -11  -2   7   310.57   296.13    13.81 o
      1789    1   8   2   7   310.57   296.13    13.81 o
      1790    2 -12  -2   7   255.90   239.74    10.36 o
      1790    1   9   2   7   255.90   239.74    10.36 o
      1791    2 -13  -2   7   143.20   128.88     9.21 o
      1791    1  10   2   7   143.20   128.88     9.21 o
      1792    2 -14  -2   7    88.37    88.61    10.36 o
      1792    1  11   2   7    88.37    88.61    10.36 o
      1793    2 -15  -2   7     9.61    15.73     9.21 <
      1793    1  12   2   7     9.61    15.73     9.21 <
      1794    2 -16  -2   7     4.53    21.10     9.21 <
      1794    1  13   2   7     4.53    21.10     9.21 <
      1795    2 -17  -2   7   165.72   184.89    13.04 o
      1795    1  14   2   7   165.72   184.89    13.04 o
      1796    2 -18  -2   7   295.83   289.23    21.48 o
      1796    1  15   2   7   295.83   289.23    21.48 o
      1797    2 -19  -2   7   234.77   238.98    20.33 o
      1797    1  16   2   7   234.77   238.98    20.33 o
      1798    2 -20  -2   7   186.86   182.20    19.95 o
      1798    1  17   2   7   186.86   182.20    19.95 o
      1799    2 -21  -2   7     5.81    14.96    14.96 <
      1799    1  18   2   7     5.81    14.96    14.96 <
      1800    2 -22  -2   7     1.41     9.21    15.73 <
      1800    1  19   2   7     1.41     9.21    15.73 <
      1801    2  18  -3   7   164.31   126.58    18.41 o
      1801    1 -21   3   7   164.31   126.58    18.41 o
      1802    2  17  -3   7    58.33    64.44    16.11 o
      1802    1 -20   3   7    58.33    64.44    16.11 o
      1803    2  16  -3   7    48.78    64.06    16.11 o
      1803    1 -19   3   7    48.78    64.06    16.11 o
      1804    2  15  -3   7   759.16   746.08    24.93 o
      1804    1 -18   3   7   759.16   746.08    24.93 o
      1805    2  14  -3   7   351.34   317.23    21.48 o
      1805    1 -17   3   7   351.34   317.23    21.48 o
      1806    2  13  -3   7   149.01   158.80    17.26 o
      1806    1 -16   3   7   149.01   158.80    17.26 o
      1807    2  12  -3   7   182.36   196.01    16.88 o
      1807    1 -15   3   7   182.36   196.01    16.88 o
      1808    2  11  -3   7   101.90    83.62    13.04 o
      1808    1 -14   3   7   101.90    83.62    13.04 o
      1809    2  10  -3   7    23.89    11.51     8.44 <
      1809    1 -13   3   7    23.89    11.51     8.44 <
      1810    2   9  -3   7     6.31    -2.69     7.67 <
      1810    1 -12   3   7     6.31    -2.69     7.67 <
      1811    2   8  -3   7   163.49   168.40    11.89 o
      1811    1 -11   3   7   163.49   168.40    11.89 o
      1812    2   7  -3   7    99.81    87.07     8.06 o
      1812    1 -10   3   7    99.81    87.07     8.06 o
      1813    2   6  -3   7   467.34   472.96    14.58 o
      1813    1  -9   3   7   467.34   472.96    14.58 o
      1814    2   5  -3   7  1012.51   942.09    17.65 o
      1814    1  -8   3   7  1012.51   942.09    17.65 o
      1815    2   4  -3   7   115.63   111.24     7.29 o
      1815    1  -7   3   7   115.63   111.24     7.29 o
      1816    2   3  -3   7   200.93   205.22     7.67 o
      1816    1  -6   3   7   200.93   205.22     7.67 o
      1817    2   2  -3   7     5.63     3.45     4.60 <
      1817    1  -5   3   7     5.63     3.45     4.60 <
      1818    2   1  -3   7     9.05    10.74     5.75 <
      1818    1  -4   3   7     9.05    10.74     5.75 <
      1819    2   0  -3   7    19.58     6.52     6.52 <
      1819    1  -3   3   7    19.58     6.52     6.52 <
      1820    2  -1  -3   7   425.71   464.14    12.27 o
      1820    1  -2   3   7   425.71   464.14    12.27 o
      1821    2  -2  -3   7   309.71   292.29    10.36 o
      1821    1  -1   3   7   309.71   292.29    10.36 o
      1822    2  -3  -3   7   444.79   456.09    14.19 o
      1822    1   0   3   7   444.79   456.09    14.19 o
      1823    2  -4  -3   7    26.73    44.88    12.27 o
      1823    1   1   3   7    26.73    44.88    12.27 o
      1824    2  -5  -3   7   106.67   122.75    14.96 o
      1824    1   2   3   7   106.67   122.75    14.96 o
      1825    2  -6  -3   7     8.59    14.96    12.27 <
      1825    1   3   3   7     8.59    14.96    12.27 <
      1826    2  -7  -3   7   192.90   214.04    17.65 o
      1826    1   4   3   7   192.90   214.04    17.65 o
      1827    2  -8  -3   7  1018.74  1004.62    39.51 o
      1827    1   5   3   7  1018.74  1004.62    39.51 o
      1828    2  -9  -3   7    48.25    49.10    16.49 <
      1828    1   6   3   7    48.25    49.10    16.49 <
      1829    2 -10  -3   7   154.66   199.85    22.63 o
      1829    1   7   3   7   154.66   199.85    22.63 o
      1830    2 -11  -3   7    43.10    34.52    17.26 <
      1830    1   8   3   7    43.10    34.52    17.26 <
      1831    2 -12  -3   7    87.19    95.51    16.49 o
      1831    1   9   3   7    87.19    95.51    16.49 o
      1832    2 -13  -3   7   126.54   153.43    13.43 o
      1832    1  10   3   7   126.54   153.43    13.43 o
      1833    2 -14  -3   7    41.69    40.66    11.12 o
      1833    1  11   3   7    41.69    40.66    11.12 o
      1834    2 -15  -3   7   118.04   144.23    13.43 o
      1834    1  12   3   7   118.04   144.23    13.43 o
      1835    2 -16  -3   7   255.63   250.87    16.11 o
      1835    1  13   3   7   255.63   250.87    16.11 o
      1836    2 -17  -3   7   212.97   211.74    15.73 o
      1836    1  14   3   7   212.97   211.74    15.73 o
      1837    2 -18  -3   7   543.92   587.66    26.47 o
      1837    1  15   3   7   543.92   587.66    26.47 o
      1838    2 -19  -3   7    56.93    65.59    18.41 o
      1838    1  16   3   7    56.93    65.59    18.41 o
      1839    2 -20  -3   7    13.67    32.60    18.41 <
      1839    1  17   3   7    13.67    32.60    18.41 <
      1840    2 -21  -3   7   129.97   126.97    22.25 o
      1840    1  18   3   7   129.97   126.97    22.25 o
      1841    2  16  -4   7   239.37   246.65    31.07 o
      1841    1 -19   4   7   239.37   246.65    31.07 o
      1842    2  15  -4   7   271.09   276.57    18.41 o
      1842    1 -18   4   7   271.09   276.57    18.41 o
      1843    2  14  -4   7   390.43   397.40    21.10 o
      1843    1 -17   4   7   390.43   397.40    21.10 o
      1844    2  13  -4   7   150.85   122.75    17.65 o
      1844    1 -16   4   7   150.85   122.75    17.65 o
      1845    2  12  -4   7    42.28    56.39    14.58 o
      1845    1 -15   4   7    42.28    56.39    14.58 o
      1846    2  11  -4   7    60.02    69.81    14.58 o
      1846    1 -14   4   7    60.02    69.81    14.58 o
      1847    2  10  -4   7   361.59   337.56    19.95 o
      1847    1 -13   4   7   361.59   337.56    19.95 o
      1848    2   9  -4   7   619.32   479.87    20.71 o
      1848    1 -12   4   7   619.32   479.87    20.71 o
      1849    2   8  -4   7  1398.28  1446.51    29.54 o
      1849    1 -11   4   7  1398.28  1446.51    29.54 o
      1850    2   7  -4   7  1521.21  1396.64    28.00 o
      1850    1 -10   4   7  1521.21  1396.64    28.00 o
      1851    2   6  -4   7  1374.16  1339.49    28.39 o
      1851    1  -9   4   7  1374.16  1339.49    28.39 o
      1852    2   5  -4   7   214.06   215.58    11.51 o
      1852    1  -8   4   7   214.06   215.58    11.51 o
      1853    2   4  -4   7   106.96   113.93     9.21 o
      1853    1  -7   4   7   106.96   113.93     9.21 o
      1854    2   3  -4   7    63.78    78.64     9.21 o
      1854    1  -6   4   7    63.78    78.64     9.21 o
      1855    2   2  -4   7    12.54    12.27     6.90 <
      1855    1  -5   4   7    12.54    12.27     6.90 <
      1856    2   1  -4   7   866.36   842.36    18.03 o
      1856    1  -4   4   7   866.36   842.36    18.03 o
      1857    2   0  -4   7  3083.96  2896.47    33.37 o
      1857    1  -3   4   7  3083.96  2896.47    33.37 o
      1858    2  -1  -4   7  3076.47  2904.14    34.91 o
      1858    1  -2   4   7  3076.47  2904.14    34.91 o
      1859    2  -2  -4   7  2154.39  2037.62    30.69 o
      1859    1  -1   4   7  2154.39  2037.62    30.69 o
      1860    2  -3  -4   7  2415.22  2313.80    30.30 o
      1860    1   0   4   7  2415.22  2313.80    30.30 o
      1861    2  -4  -4   7  1608.49  1532.05    24.55 o
      1861    1   1   4   7  1608.49  1532.05    24.55 o
      1862    2  -5  -4   7    18.70    17.65     8.82 <
      1862    1   2   4   7    18.70    17.65     8.82 <
      1863    2  -6  -4   7     5.66     8.44    10.74 <
      1863    1   3   4   7     5.66     8.44    10.74 <
      1864    2  -7  -4   7   306.37   325.67    11.89 o
      1864    1   4   4   7   306.37   325.67    11.89 o
      1865    2  -8  -4   7   324.87   322.21    11.51 o
      1865    1   5   4   7   324.87   322.21    11.51 o
      1866    2  -9  -4   7   898.91   940.17    29.92 o
      1866    1   6   4   7   898.91   940.17    29.92 o
      1867    2 -10  -4   7  1349.62  1316.09    24.93 o
      1867    1   7   4   7  1349.62  1316.09    24.93 o
      1868    2 -11  -4   7  1362.09  1288.09    25.70 o
      1868    1   8   4   7  1362.09  1288.09    25.70 o
      1869    2 -12  -4   7   386.89   338.32    14.96 o
      1869    1   9   4   7   386.89   338.32    14.96 o
      1870    2 -13  -4   7   355.69   364.79    15.73 o
      1870    1  10   4   7   355.69   364.79    15.73 o
      1871    2 -14  -4   7    93.11    80.55    11.12 o
      1871    1  11   4   7    93.11    80.55    11.12 o
      1872    2 -15  -4   7    31.52    44.11    11.12 o
      1872    1  12   4   7    31.52    44.11    11.12 o
      1873    2 -16  -4   7   261.13   260.07    16.11 o
      1873    1  13   4   7   261.13   260.07    16.11 o
      1874    2 -17  -4   7   372.94   328.73    18.41 o
      1874    1  14   4   7   372.94   328.73    18.41 o
      1875    2 -18  -4   7   182.70   220.18    21.48 o
      1875    1  15   4   7   182.70   220.18    21.48 o
      1876    2 -19  -4   7   220.29   227.08    23.02 o
      1876    1  16   4   7   220.29   227.08    23.02 o
      1877    2  14  -5   7    90.92    90.53    34.14 <
      1877    1 -17   5   7    90.92    90.53    34.14 <
      1878    2  13  -5   7   431.49   365.56    46.03 o
      1878    1 -16   5   7   431.49   365.56    46.03 o
      1879    2  12  -5   7   272.34   275.42    39.89 o
      1879    1 -15   5   7   272.34   275.42    39.89 o
      1880    2  11  -5   7    11.44     8.82    18.80 <
      1880    1 -14   5   7    11.44     8.82    18.80 <
      1881    2  10  -5   7     3.54    -6.90    17.26 <
      1881    1 -13   5   7     3.54    -6.90    17.26 <
      1882    2   9  -5   7    35.69    -2.69    15.73 <
      1882    1 -12   5   7    35.69    -2.69    15.73 <
      1883    2   8  -5   7     1.84    -4.22    15.73 <
      1883    1 -11   5   7     1.84    -4.22    15.73 <
      1884    2   7  -5   7    67.68    61.37    18.41 o
      1884    1 -10   5   7    67.68    61.37    18.41 o
      1885    2   6  -5   7   354.00   324.13    27.23 o
      1885    1  -9   5   7   354.00   324.13    27.23 o
      1886    2   5  -5   7   177.02   179.52    17.26 o
      1886    1  -8   5   7   177.02   179.52    17.26 o
      1887    2   4  -5   7   229.45   205.99    14.96 o
      1887    1  -7   5   7   229.45   205.99    14.96 o
      1888    2   3  -5   7    25.28    13.04     9.97 <
      1888    1  -6   5   7    25.28    13.04     9.97 <
      1889    2   2  -5   7    91.55   107.40    13.04 o
      1889    1  -5   5   7    91.55   107.40    13.04 o
      1890    2   1  -5   7   269.65   292.68    16.88 o
      1890    1  -4   5   7   269.65   292.68    16.88 o
      1891    2   0  -5   7   130.04   156.89    15.34 o
      1891    1  -3   5   7   130.04   156.89    15.34 o
      1892    2  -1  -5   7    32.83    34.52    13.04 <
      1892    1  -2   5   7    32.83    34.52    13.04 <
      1893    2  -2  -5   7    20.00    21.10    12.66 <
      1893    1  -1   5   7    20.00    21.10    12.66 <
      1894    2  -3  -5   7   100.66   103.18    12.66 o
      1894    1   0   5   7   100.66   103.18    12.66 o
      1895    2  -4  -5   7   361.30   393.18    21.10 o
      1895    1   1   5   7   361.30   393.18    21.10 o
      1896    2  -5  -5   7    77.86    89.76     8.82 o
      1896    1   2   5   7    77.86    89.76     8.82 o
      1897    2  -6  -5   7    31.48    26.08     8.06 o
      1897    1   3   5   7    31.48    26.08     8.06 o
      1898    2  -7  -5   7   408.44   384.74    15.34 o
      1898    1   4   5   7   408.44   384.74    15.34 o
      1899    2  -8  -5   7   217.85   237.44    13.04 o
      1899    1   5   5   7   217.85   237.44    13.04 o
      1900    2  -9  -5   7    99.72    97.43    12.27 o
      1900    1   6   5   7    99.72    97.43    12.27 o
      1901    2 -10  -5   7    64.15    64.83    11.12 o
      1901    1   7   5   7    64.15    64.83    11.12 o
      1902    2 -11  -5   7     2.56     0.77     8.82 <
      1902    1   8   5   7     2.56     0.77     8.82 <
      1903    2 -12  -5   7    11.23    18.03    11.12 <
      1903    1   9   5   7    11.23    18.03    11.12 <
      1904    2 -13  -5   7    10.24    13.04    10.74 <
      1904    1  10   5   7    10.24    13.04    10.74 <
      1905    2 -14  -5   7   102.02   130.42    14.96 o
      1905    1  11   5   7   102.02   130.42    14.96 o
      1906    2 -15  -5   7   139.70   129.27    14.96 o
      1906    1  12   5   7   139.70   129.27    14.96 o
      1907    2 -16  -5   7   235.72   267.36    24.17 o
      1907    1  13   5   7   235.72   267.36    24.17 o
      1908    2 -17  -5   7   219.82   231.30    24.17 o
      1908    1  14   5   7   219.82   231.30    24.17 o
      1909    2  11  -6   7   553.61   670.51    59.84 o
      1909    1 -14   6   7   553.61   670.51    59.84 o
      1910    2  10  -6   7   269.61   262.37    43.35 o
      1910    1 -13   6   7   269.61   262.37    43.35 o
      1911    2   9  -6   7    72.57    95.90    33.76 <
      1911    1 -12   6   7    72.57    95.90    33.76 <
      1912    2   8  -6   7   110.23   138.48    24.93 o
      1912    1 -11   6   7   110.23   138.48    24.93 o
      1913    2   7  -6   7   375.19   352.52    31.45 o
      1913    1 -10   6   7   375.19   352.52    31.45 o
      1914    2   6  -6   7   333.04   352.52    30.30 o
      1914    1  -9   6   7   333.04   352.52    30.30 o
      1915    2   5  -6   7   687.64   655.55    38.36 o
      1915    1  -8   6   7   687.64   655.55    38.36 o
      1916    2   4  -6   7  1561.12  1445.74    49.10 o
      1916    1  -7   6   7  1561.12  1445.74    49.10 o
      1917    2   3  -6   7  1387.25  1346.01    38.74 o
      1917    1  -6   6   7  1387.25  1346.01    38.74 o
      1918    2   2  -6   7  1132.37  1093.99    33.37 o
      1918    1  -5   6   7  1132.37  1093.99    33.37 o
      1919    2   1  -6   7   470.67   474.11    20.33 o
      1919    1  -4   6   7   470.67   474.11    20.33 o
      1920    2   0  -6   7   164.13   178.37    14.58 o
      1920    1  -3   6   7   164.13   178.37    14.58 o
      1921    2  -1  -6   7   141.08   149.60    14.19 o
      1921    1  -2   6   7   141.08   149.60    14.19 o
      1922    2  -2  -6   7   123.18   171.08    14.96 o
      1922    1  -1   6   7   123.18   171.08    14.96 o
      1923    2  -3  -6   7   435.59   455.32    20.33 o
      1923    1   0   6   7   435.59   455.32    20.33 o
      1924    2  -4  -6   7   679.48   657.85    22.63 o
      1924    1   1   6   7   679.48   657.85    22.63 o
      1925    2  -5  -6   7  1185.87  1108.95    28.77 o
      1925    1   2   6   7  1185.87  1108.95    28.77 o
      1926    2  -6  -6   7  1706.17  1588.82    39.51 o
      1926    1   3   6   7  1706.17  1588.82    39.51 o
      1927    2  -7  -6   7   953.28   938.26    38.74 o
      1927    1   4   6   7   953.28   938.26    38.74 o
      1928    2  -8  -6   7   422.39   357.12    28.77 o
      1928    1   5   6   7   422.39   357.12    28.77 o
      1929    2  -9  -6   7   299.82   280.02    26.85 o
      1929    1   6   6   7   299.82   280.02    26.85 o
      1930    2 -10  -6   7   265.90   267.36    26.08 o
      1930    1   7   6   7   265.90   267.36    26.08 o
      1931    2 -11  -6   7   109.68   102.80    21.48 o
      1931    1   8   6   7   109.68   102.80    21.48 o
      1932    2 -12  -6   7   175.87   141.93    24.93 o
      1932    1   9   6   7   175.87   141.93    24.93 o
      1933    2 -13  -6   7   397.51   412.36    32.99 o
      1933    1  10   6   7   397.51   412.36    32.99 o
      1934    2   4  -7   7    49.38    55.62    21.48 <
      1934    1  -7   7   7    49.38    55.62    21.48 <
      1935    2   3  -7   7     6.28   -13.81    16.49 <
      1935    1  -6   7   7     6.28   -13.81    16.49 <
      1936    2   2  -7   7     1.88   -10.74    16.88 <
      1936    1  -5   7   7     1.88   -10.74    16.88 <
      1937    2   1  -7   7    77.47    79.79    16.88 o
      1937    1  -4   7   7    77.47    79.79    16.88 o
      1938    2   0  -7   7    48.63    67.13    15.73 o
      1938    1  -3   7   7    48.63    67.13    15.73 o
      1939    2  -1  -7   7    14.63    16.88    13.81 <
      1939    1  -2   7   7    14.63    16.88    13.81 <
      1940    2  -2  -7   7    32.06    53.32    15.34 o
      1940    1  -1   7   7    32.06    53.32    15.34 o
      1941    2  -3  -7   7    40.20    56.39    12.66 o
      1941    1   0   7   7    40.20    56.39    12.66 o
      1942    2  -4  -7   7    56.95    51.02    12.66 o
      1942    1   1   7   7    56.95    51.02    12.66 o
      1943    2  -5  -7   7     1.29     4.60    12.66 <
      1943    1   2   7   7     1.29     4.60    12.66 <
      1944    2  -6  -7   7   108.74   111.24    21.48 o
      1944    1   3   7   7   108.74   111.24    21.48 o
      1945    2  -7  -7   7    93.87    77.10    20.33 o
      1945    1   4   7   7    93.87    77.10    20.33 o
      1946    1 -23   0   8    21.94   -50.25    40.28 <
      1947    1 -22   0   8   248.56   241.28    56.00 o
      1948    1 -21   0   8   295.87   263.52    58.69 o
      1949    1 -20   0   8  1758.68  1604.93    62.91 o
      1950    1 -19   0   8  2014.12  1710.80    59.46 o
      1951    1 -18   0   8  1461.92  1422.34    56.77 o
      1952    1 -17   0   8  1600.37  1518.24    55.62 o
      1953    1 -16   0   8    26.53    22.25    18.03 <
      1954    1 -15   0   8    17.68    27.23    19.56 <
      1955    1 -14   0   8   133.59   118.14    13.43 o
      1956    1 -13   0   8   805.32   787.89    39.13 o
      1957    1 -12   0   8  3308.91  3174.57    89.38 o
      1958    1 -11   0   8  6639.04  6910.72   114.31 o
      1959    1 -10   0   8 16799.60 16682.20   250.48 o
      1960    1  -9   0   8 15574.80 16625.50   198.32 o
      1961    1  -8   0   8  4086.15  4029.59    59.07 o
      1962    1  -7   0   8  1692.65  1799.41    31.07 o
      1963    1  -6   0   8  2443.42  2578.86    34.91 o
      1964    1  -5   0   8   689.25   668.21    16.88 o
      1965    1  -4   0   8    25.83    80.17     8.06 o
      1966    1  -3   0   8  6732.74  7322.31    73.27 o
      1967    1  -2   0   8  4234.43  4155.79    49.48 o
      1968    1  -1   0   8  8970.45  8995.90    97.43 o
      1969    1   0   0   8  9388.77  9404.04    92.44 o
      1970    1   1   0   8    38.44    12.66     5.37 <
      1971    1   2   0   8  1996.32  1899.53    23.02 o
      1972    1   3   0   8  4831.28  4990.48    49.87 o
      1973    1   4   0   8  2106.65  2145.79    27.62 o
      1974    1   5   0   8  3765.15  3883.83    42.96 o
      1975    1   6   0   8 10770.70 10234.90    98.58 o
      1976    1   7   0   8  8792.80  8165.43    80.55 o
      1977    1   8   0   8  3480.60  3286.58    36.44 o
      1978    1   9   0   8   936.89   936.34    15.34 o
      1979    1  10   0   8    35.72    46.03     5.37 o
      1980    1  11   0   8    30.34    31.45     5.37 o
      1981    1  12   0   8   128.15   105.49     8.44 o
      1982    1  13   0   8   200.51   197.16    12.66 o
      1983    1  14   0   8   227.78   199.08    19.56 o
      1984    1  15   0   8   588.36   621.03    33.37 o
      1985    1  16   0   8   247.06   276.57    26.08 o
      1986    1  17   0   8   660.50   534.72    62.14 o
      1987    1  18   0   8   133.73    50.63    31.84 <
      1988    1  19   0   8     6.32   -49.10    32.99 <
      1989    1 -23   1   8    17.71   -21.86    23.02 <
      1990    1 -22   1   8     7.48   -14.58    22.63 <
      1991    1 -21   1   8     2.02   -54.47    19.56 <
      1992    1 -20   1   8     1.85   -11.89    20.33 <
      1993    1 -19   1   8    57.10    50.63    21.10 <
      1994    1 -18   1   8    20.13    -2.69    17.65 <
      1995    1 -17   1   8    36.82    30.30    17.26 <
      1996    1 -16   1   8    24.51    40.28    13.04 o
      1997    1 -15   1   8     8.82    12.27    10.74 <
      1998    1 -14   1   8    23.51    31.07    10.74 <
      1999    1 -13   1   8     2.58     8.06     6.90 <
      2000    1 -12   1   8   290.01   313.39    16.49 o
      2001    1 -11   1   8   614.16   611.44    15.73 o
      2002    1 -10   1   8   188.39   227.85    11.51 o
      2003    1  -9   1   8    13.11    36.06     6.90 o
      2004    1  -8   1   8   715.58   698.51    14.96 o
      2005    1  -7   1   8   531.04   609.52    14.96 o
      2006    1  -6   1   8   915.31  1005.77    13.04 o
      2007    1  -5   1   8  2424.69  3089.80    28.77 o
      2008    1  -4   1   8  2783.63  3537.06    31.84 o
      2009    1  -3   1   8    38.61    31.45     4.60 o
      2010    1  -2   1   8  1130.21  1302.66    14.19 o
      2011    1  -1   1   8    41.26    42.19     6.90 o
      2012    1   0   1   8  1145.05  1407.00    24.17 o
      2013    1   1   1   8   820.18   939.79    14.58 o
      2014    1   2   1   8   673.50   686.62    13.04 o
      2015    1   3   1   8   189.39   192.18     8.82 o
      2016    1   4   1   8    54.46    63.29     6.90 o
      2017    1   5   1   8    27.64     8.06     6.14 <
      2018    1   6   1   8     0.13    -3.07     4.99 <
      2019    1   7   1   8   281.80   296.13     8.06 o
      2020    1   8   1   8   870.72   836.60    12.66 o
      2021    1   9   1   8   920.06   877.27    13.43 o
      2022    1  10   1   8   488.30   494.45    11.89 o
      2023    1  11   1   8   459.42   444.20    12.66 o
      2024    1  12   1   8   129.46   155.35     9.21 o
      2025    1  13   1   8    12.60     8.44     6.52 <
      2026    1  14   1   8    94.70    80.94     9.59 o
      2027    1  15   1   8   192.52   192.95    14.19 o
      2028    1  16   1   8    15.68     8.06     9.97 <
      2029    1  17   1   8     0.48     1.15    10.36 <
      2030    1  18   1   8     0.68    37.21    11.89 o
      2031    1  19   1   8    33.42    54.09    14.96 o
      2032    1 -22   2   8     2.58   -60.22    20.71 <
      2033    1 -21   2   8   212.62   162.26    31.07 o
      2034    1 -20   2   8   275.43   230.92    29.92 o
      2035    1 -19   2   8   200.56   212.89    28.00 o
      2036    1 -18   2   8   634.87   692.76    40.28 o
      2037    1 -17   2   8  1904.76  1780.23    43.73 o
      2038    1 -16   2   8  2282.51  2011.53    44.88 o
      2039    1 -15   2   8  1046.31  1076.73    31.84 o
      2040    1 -14   2   8  1747.31  1637.15    38.36 o
      2041    1 -13   2   8  1230.89  1213.29    26.85 o
      2042    1 -12   2   8   388.39   398.93    15.73 o
      2043    1 -11   2   8   687.94   634.07    18.41 o
      2044    1 -10   2   8   720.28   733.80    20.33 o
      2045    1  -9   2   8  1371.17  1262.39    18.03 o
      2046    1  -8   2   8  2611.86  2642.54    29.54 o
      2047    1  -7   2   8  4452.72  4345.28    41.04 o
      2048    1  -6   2   8  4255.64  4250.92    40.28 o
      2049    1  -5   2   8  3036.88  3025.74    30.69 o
      2050    1  -4   2   8  4102.68  3959.39    36.44 o
      2051    1  -3   2   8  5974.69  6171.54    51.78 o
      2052    1  -2   2   8  3953.63  4012.33    34.52 o
      2053    1  -1   2   8  2660.11  2640.23    32.60 o
      2054    1   0   2   8 10506.20 11247.60   105.87 o
      2055    1   1   2   8  5993.77  5934.87    62.14 o
      2056    1   2   2   8  1109.48  1021.88    19.56 o
      2057    1   3   2   8  2896.98  2937.52    34.52 o
      2058    1   4   2   8   272.50   222.10    11.12 o
      2059    1   5   2   8    13.55    23.78     8.44 <
      2060    1   6   2   8   150.07   175.68    10.74 o
      2061    1   7   2   8   123.13   138.48    10.74 o
      2062    1   8   2   8   435.74   407.37    14.96 o
      2063    1   9   2   8   829.74   836.22    16.11 o
      2064    1  10   2   8  1343.67  1237.84    19.56 o
      2065    1  11   2   8  1186.44  1099.75    22.25 o
      2066    1  12   2   8   440.56   473.73    17.65 o
      2067    1  13   2   8   501.54   464.52    16.88 o
      2068    1  14   2   8   699.61   686.24    20.33 o
      2069    1  15   2   8   180.68   174.92    18.03 o
      2070    1  16   2   8    14.18    18.80    14.96 <
      2071    1  17   2   8   114.17   127.35    18.41 o
      2072    1  18   2   8    65.28    56.77    16.88 o
      2073    1  19   2   8    41.72     9.97    15.73 <
      2074    1 -21   3   8   538.43   521.68    29.54 o
      2075    1 -20   3   8   115.63    85.92    17.26 o
      2076    1 -19   3   8     0.48    22.25    18.41 <
      2077    1 -18   3   8     4.52   -11.89    12.66 <
      2078    1 -17   3   8   309.36   279.64    22.25 o
      2079    1 -16   3   8   510.49   497.90    24.93 o
      2080    1 -15   3   8    13.63    18.80    11.51 <
      2081    1 -14   3   8    94.52   100.88    13.81 o
      2082    1 -13   3   8   263.24   240.51    16.88 o
      2083    1 -12   3   8   239.37   223.63    13.43 o
      2084    1 -11   3   8    13.15     2.30     7.29 <
      2085    1 -10   3   8   489.86   459.54    14.19 o
      2086    1  -9   3   8  1174.77  1094.76    20.33 o
      2087    1  -8   3   8  1647.18  1555.83    23.78 o
      2088    1  -7   3   8   293.59   279.25    11.12 o
      2089    1  -6   3   8   201.85   209.44     9.21 o
      2090    1  -5   3   8  1384.28  1374.01    19.95 o
      2091    1  -4   3   8  3622.74  3583.09    39.51 o
      2092    1  -3   3   8   797.67   721.53    16.88 o
      2093    1  -2   3   8    25.89    32.99     6.52 o
      2094    1  -1   3   8  1889.03  1843.91    23.40 o
      2095    1   0   3   8  5857.04  5588.11    77.48 o
      2096    1   1   3   8  5674.07  5084.07    88.99 o
      2097    1   2   3   8  4027.42  3773.74    74.80 o
      2098    1   3   3   8   139.84   127.35    23.02 o
      2099    1   4   3   8    76.58    86.69    20.71 o
      2100    1   5   3   8   153.20   124.67    23.02 o
      2101    1   6   3   8   957.82   934.80    41.43 o
      2102    1   7   3   8     4.61    -2.30    13.43 <
      2103    1   8   3   8   478.08   552.37    29.15 o
      2104    1   9   3   8   353.87   364.02    24.55 o
      2105    1  10   3   8   429.46   403.53    17.26 o
      2106    1  11   3   8   303.69   335.64    16.88 o
      2107    1  12   3   8    20.83     8.82    10.74 <
      2108    1  13   3   8   132.27   145.38    13.81 o
      2109    1  14   3   8     0.98    21.10    12.66 <
      2110    1  15   3   8   149.04   159.19    18.41 o
      2111    1  16   3   8   160.49   157.65    22.63 o
      2112    1  17   3   8   291.09   277.72    27.23 o
      2113    1 -19   4   8    49.39    54.47    14.58 o
      2114    1 -18   4   8    54.26    53.32    13.81 o
      2115    1 -17   4   8    73.05    62.14    16.49 o
      2116    1 -16   4   8    56.14    34.91    14.58 <
      2117    1 -15   4   8   303.26   307.25    21.86 o
      2118    1 -14   4   8   780.41   801.70    31.07 o
      2119    1 -13   4   8   836.29   790.19    28.77 o
      2120    1 -12   4   8   729.11   769.86    29.15 o
      2121    1 -11   4   8  1254.30  1180.68    30.69 o
      2122    1 -10   4   8   562.00   589.57    25.32 o
      2123    1  -9   4   8   472.17   475.27    16.88 o
      2124    1  -8   4   8  1228.18  1154.60    21.10 o
      2125    1  -7   4   8   924.77   844.28    18.41 o
      2126    1  -6   4   8  1717.96  1598.03    26.85 o
      2127    1  -5   4   8  1354.53  1222.49    21.10 o
      2128    1  -4   4   8  1173.95  1158.05    23.02 o
      2129    1  -3   4   8   704.15   683.55    19.18 o
      2130    1  -2   4   8    69.85    61.37     9.59 o
      2131    1  -1   4   8   118.79   118.91     9.97 o
      2132    1   0   4   8    23.86    26.08    11.51 <
      2133    1   1   4   8   599.05   564.64    17.26 o
      2134    1   2   4   8   928.12   911.41    22.63 o
      2135    1   3   4   8  1238.85  1146.93    28.00 o
      2136    1   4   4   8  3299.64  3314.20    77.10 o
      2137    1   5   4   8  1078.39   983.14    32.99 o
      2138    1   6   4   8   922.27   886.85    27.23 o
      2139    1   7   4   8   640.91   611.44    34.14 o
      2140    1   8   4   8    35.68    38.36     8.82 o
      2141    1   9   4   8   118.97   100.50    10.36 o
      2142    1  10   4   8    57.21    56.00     9.59 o
      2143    1  11   4   8   111.76   141.16    13.43 o
      2144    1  12   4   8    67.46    76.72    12.27 o
      2145    1  13   4   8    26.88    20.71    11.51 <
      2146    1  14   4   8    19.31    38.74    12.66 o
      2147    1  15   4   8     1.80    -0.38    15.73 <
      2148    1  16   4   8     0.30    31.84    16.49 <
      2149    1 -17   5   8     0.13   -14.96    28.77 <
      2150    1 -16   5   8    27.30    29.15    19.95 <
      2151    1 -15   5   8     5.00    24.55    18.80 <
      2152    1 -14   5   8     0.02    -9.97    18.03 <
      2153    1 -13   5   8     0.57     6.90    16.11 <
      2154    1 -12   5   8     2.77     2.30    16.11 <
      2155    1 -11   5   8    13.17    25.70    17.65 <
      2156    1 -10   5   8    31.00    34.14    16.88 <
      2157    1  -9   5   8    52.58    48.72    17.26 <
      2158    1  -8   5   8     6.23    -2.69    11.12 <
      2159    1  -7   5   8   148.20   148.83    13.43 o
      2160    1  -6   5   8   728.68   699.66    23.78 o
      2161    1  -5   5   8   308.86   353.67    18.80 o
      2162    1  -4   5   8   222.78   258.92    18.80 o
      2163    1  -3   5   8   212.72   249.33    18.80 o
      2164    1  -2   5   8   314.91   337.17    18.03 o
      2165    1  -1   5   8    23.46    32.99    11.12 <
      2166    1   0   5   8     6.56    -1.92    10.74 <
      2167    1   1   5   8   302.11   268.13    16.11 o
      2168    1   2   5   8    12.98     9.97    13.04 <
      2169    1   3   5   8    84.12    83.62     9.59 o
      2170    1   4   5   8   221.14   200.62    12.27 o
      2171    1   5   5   8   131.75   148.07    11.89 o
      2172    1   6   5   8   328.92   285.01    16.49 o
      2173    1   7   5   8   168.15   137.71    12.27 o
      2174    1   8   5   8   702.61   642.89    22.63 o
      2175    1   9   5   8   364.53   318.38    18.03 o
      2176    1  10   5   8   240.84   233.22    16.11 o
      2177    1  11   5   8   640.88   573.85    23.40 o
      2178    1  12   5   8   188.89   198.32    16.88 o
      2179    1  13   5   8    29.62    28.00    16.88 <
      2180    1 -13   6   8   194.54   171.46    41.81 o
      2181    1 -12   6   8   133.00    99.73    23.02 o
      2182    1 -11   6   8    30.26    28.00    20.71 <
      2183    1 -10   6   8    61.27    70.20    21.10 o
      2184    1  -9   6   8     3.07    -1.53    18.41 <
      2185    1  -8   6   8    15.61    29.15    19.18 <
      2186    1  -7   6   8   360.08   398.55    31.84 o
      2187    1  -6   6   8   627.12   646.34    28.77 o
      2188    1  -5   6   8  1169.41  1107.42    34.52 o
      2189    1  -4   6   8   416.03   408.52    20.33 o
      2190    1  -3   6   8    16.22    25.70    10.74 <
      2191    1  -2   6   8   127.98   144.61    14.58 o
      2192    1  -1   6   8    34.07    23.40    10.74 <
      2193    1   0   6   8    34.11    30.30    11.12 <
      2194    1   1   6   8   163.50   185.66    15.73 o
      2195    1   2   6   8   760.42   733.42    28.39 o
      2196    1   3   6   8   474.46   433.07    23.78 o
      2197    1   4   6   8    28.16    50.25    17.65 <
      2198    1   5   6   8    69.16    91.29    20.33 o
      2199    1   6   6   8   104.04   125.82    21.10 o
      2200    1   7   6   8   104.45   112.01    21.86 o
      2201    1   8   6   8     0.41     1.15    16.88 <
      2202    1   9   6   8     0.83    45.65    19.95 <
      2203    1  10   6   8   225.57   256.62    27.62 o
      2204    1  -7   7   8    65.86   102.03    23.02 o
      2205    1  -6   7   8    46.86     0.00    18.80 <
      2206    1  -5   7   8    84.51   133.49    24.55 o
      2207    1  -4   7   8   118.55   132.72    18.80 o
      2208    1  -3   7   8   205.46   226.32    21.48 o
      2209    1  -2   7   8   180.72   212.51    21.48 o
      2210    1  -1   7   8   132.11   160.34    16.11 o
      2211    1   0   7   8   123.01   112.01    14.58 o
      2212    1   1   7   8    21.25    23.02    11.89 <
      2213    1   2   7   8    26.81    49.10    18.03 <
      2214    1   3   7   8   146.07   162.26    23.78 o
      2215    2  19  -1   9    65.66    92.83    29.15 o
      2215    1 -23   1   9    65.66    92.83    29.15 o
      2216    2  18  -1   9    23.96    36.06    24.93 <
      2216    1 -22   1   9    23.96    36.06    24.93 <
      2217    2  17  -1   9   144.78   115.84    26.47 o
      2217    1 -21   1   9   144.78   115.84    26.47 o
      2218    2  16  -1   9    14.53     8.06    22.25 <
      2218    1 -20   1   9    14.53     8.06    22.25 <
      2219    2  15  -1   9    26.21   -10.36    20.71 <
      2219    1 -19   1   9    26.21   -10.36    20.71 <
      2220    2  14  -1   9    55.17    65.59    19.18 o
      2220    1 -18   1   9    55.17    65.59    19.18 o
      2221    2  13  -1   9   730.07   791.72    39.51 o
      2221    1 -17   1   9   730.07   791.72    39.51 o
      2222    2  12  -1   9  1150.53  1310.72    35.67 o
      2222    1 -16   1   9  1150.53  1310.72    35.67 o
      2223    2  11  -1   9   660.39   793.26    28.00 o
      2223    1 -15   1   9   660.39   793.26    28.00 o
      2224    2  10  -1   9   279.47   358.27    18.41 o
      2224    1 -14   1   9   279.47   358.27    18.41 o
      2225    2   7  -1   9    20.82    35.67     8.82 o
      2225    1 -11   1   9    20.82    35.67     8.82 o
      2226    2   6  -1   9   101.58   121.60     9.59 o
      2226    1 -10   1   9   101.58   121.60     9.59 o
      2227    2   5  -1   9  2577.95  2568.50    32.60 o
      2227    1  -9   1   9  2577.95  2568.50    32.60 o
      2228    2   4  -1   9  6812.06  6985.52    67.13 o
      2228    1  -8   1   9  6812.06  6985.52    67.13 o
      2229    2   3  -1   9  3552.08  3766.45    33.76 o
      2229    1  -7   1   9  3552.08  3766.45    33.76 o
      2230    2   2  -1   9  4611.53  5249.78    42.58 o
      2230    1  -6   1   9  4611.53  5249.78    42.58 o
      2231    2   1  -1   9  4226.76  5356.42    43.73 o
      2231    1  -5   1   9  4226.76  5356.42    43.73 o
      2232    2   0  -1   9   292.11    70.20    13.81 o
      2232    1  -4   1   9   292.11    70.20    13.81 o
      2233    2  -1  -1   9   362.96   355.97     8.44 o
      2233    1  -3   1   9   362.96   355.97     8.44 o
      2234    2  -2  -1   9  2044.15  2289.25    24.93 o
      2234    1  -2   1   9  2044.15  2289.25    24.93 o
      2235    2  -3  -1   9   542.76   421.95    14.19 o
      2235    1  -1   1   9   542.76   421.95    14.19 o
      2236    2  -4  -1   9  7297.26  7444.29    72.50 o
      2236    1   0   1   9  7297.26  7444.29    72.50 o
      2237    2  -5  -1   9 14027.10 14826.80   133.10 o
      2237    1   1   1   9 14027.10 14826.80   133.10 o
      2238    2  -6  -1   9  4209.88  3980.87    42.58 o
      2238    1   2   1   9  4209.88  3980.87    42.58 o
      2239    2  -7  -1   9  3991.98  4009.26    41.43 o
      2239    1   3   1   9  3991.98  4009.26    41.43 o
      2240    2  -8  -1   9  2905.11  3015.38    32.22 o
      2240    1   4   1   9  2905.11  3015.38    32.22 o
      2241    2  -9  -1   9   388.38   403.53    18.03 o
      2241    1   5   1   9   388.38   403.53    18.03 o
      2242    2 -10  -1   9    84.71    83.24     8.82 o
      2242    1   6   1   9    84.71    83.24     8.82 o
      2243    2 -11  -1   9   509.04   484.86     9.59 o
      2243    1   7   1   9   509.04   484.86     9.59 o
      2244    2 -12  -1   9  2233.72  2134.67    23.02 o
      2244    1   8   1   9  2233.72  2134.67    23.02 o
      2245    2 -13  -1   9  3154.17  2978.56    29.54 o
      2245    1   9   1   9  3154.17  2978.56    29.54 o
      2246    2 -14  -1   9  1978.70  1944.79    24.55 o
      2246    1  10   1   9  1978.70  1944.79    24.55 o
      2247    2 -15  -1   9  2394.29  2397.81    28.77 o
      2247    1  11   1   9  2394.29  2397.81    28.77 o
      2248    2 -16  -1   9  2087.97  2149.63    27.23 o
      2248    1  12   1   9  2087.97  2149.63    27.23 o
      2249    2 -17  -1   9   143.33   183.35     9.97 o
      2249    1  13   1   9   143.33   183.35     9.97 o
      2250    2 -18  -1   9    78.64    83.24     9.59 o
      2250    1  14   1   9    78.64    83.24     9.59 o
      2251    2 -19  -1   9   359.80   327.97    16.49 o
      2251    1  15   1   9   359.80   327.97    16.49 o
      2252    2 -20  -1   9   112.08    97.81    12.27 o
      2252    1  16   1   9   112.08    97.81    12.27 o
      2253    2 -21  -1   9   383.32   378.60    18.03 o
      2253    1  17   1   9   383.32   378.60    18.03 o
      2254    2 -22  -1   9   600.20   555.43    21.48 o
      2254    1  18   1   9   600.20   555.43    21.48 o
      2255    2 -23  -1   9   396.76   394.33    42.19 o
      2255    1  19   1   9   396.76   394.33    42.19 o
      2256    2  18  -2   9    18.97   -13.04    26.08 <
      2256    1 -22   2   9    18.97   -13.04    26.08 <
      2257    2  17  -2   9     1.50     4.99    20.71 <
      2257    1 -21   2   9     1.50     4.99    20.71 <
      2258    2  16  -2   9    99.13    90.53    24.17 o
      2258    1 -20   2   9    99.13    90.53    24.17 o
      2259    2  15  -2   9   257.26   255.47    29.15 o
      2259    1 -19   2   9   257.26   255.47    29.15 o
      2260    2  14  -2   9   340.92   384.36    32.22 o
      2260    1 -18   2   9   340.92   384.36    32.22 o
      2261    2  13  -2   9   466.22   484.47    26.08 o
      2261    1 -17   2   9   466.22   484.47    26.08 o
      2262    2  12  -2   9   106.86   112.01    15.34 o
      2262    1 -16   2   9   106.86   112.01    15.34 o
      2263    2  11  -2   9    58.33    62.52    13.43 o
      2263    1 -15   2   9    58.33    62.52    13.43 o
      2264    2  10  -2   9     2.79     6.52    10.36 <
      2264    1 -14   2   9     2.79     6.52    10.36 <
      2265    2   9  -2   9     1.59     5.75     9.59 <
      2265    1 -13   2   9     1.59     5.75     9.59 <
      2266    2   8  -2   9    40.71    34.52     8.06 o
      2266    1 -12   2   9    40.71    34.52     8.06 o
      2267    2   7  -2   9   238.04   291.91    12.66 o
      2267    1 -11   2   9   238.04   291.91    12.66 o
      2268    2   6  -2   9  1402.17  1351.00    24.17 o
      2268    1 -10   2   9  1402.17  1351.00    24.17 o
      2269    2   5  -2   9  1201.25  1199.48    21.10 o
      2269    1  -9   2   9  1201.25  1199.48    21.10 o
      2270    2   4  -2   9   518.41   511.71    13.81 o
      2270    1  -8   2   9   518.41   511.71    13.81 o
      2271    2   3  -2   9   625.67   619.11    13.43 o
      2271    1  -7   2   9   625.67   619.11    13.43 o
      2272    2   2  -2   9    37.16    35.67     5.75 o
      2272    1  -6   2   9    37.16    35.67     5.75 o
      2273    2   1  -2   9    65.79    71.73     6.14 o
      2273    1  -5   2   9    65.79    71.73     6.14 o
      2274    2   0  -2   9   145.08   149.22     8.06 o
      2274    1  -4   2   9   145.08   149.22     8.06 o
      2275    2  -1  -2   9    33.67    18.41     6.52 <
      2275    1  -3   2   9    33.67    18.41     6.52 <
      2276    2  -2  -2   9   470.93   525.13    11.12 o
      2276    1  -2   2   9   470.93   525.13    11.12 o
      2277    2  -3  -2   9   878.84   889.92    18.03 o
      2277    1  -1   2   9   878.84   889.92    18.03 o
      2278    2  -4  -2   9    22.91     7.29     6.90 <
      2278    1   0   2   9    22.91     7.29     6.90 <
      2279    2  -5  -2   9    19.69    26.85     7.67 o
      2279    1   1   2   9    19.69    26.85     7.67 o
      2280    2  -6  -2   9    61.96    65.59     8.06 o
      2280    1   2   2   9    61.96    65.59     8.06 o
      2281    2  -7  -2   9   120.25   112.78     8.44 o
      2281    1   3   2   9   120.25   112.78     8.44 o
      2282    2  -8  -2   9    36.79    62.14    11.89 o
      2282    1   4   2   9    36.79    62.14    11.89 o
      2283    2  -9  -2   9    46.99    65.98    23.02 <
      2283    1   5   2   9    46.99    65.98    23.02 <
      2284    2 -10  -2   9   251.15   280.02    14.19 o
      2284    1   6   2   9   251.15   280.02    14.19 o
      2285    2 -11  -2   9  1196.87  1110.49    22.25 o
      2285    1   7   2   9  1196.87  1110.49    22.25 o
      2286    2 -12  -2   9   642.26   616.81    18.41 o
      2286    1   8   2   9   642.26   616.81    18.41 o
      2287    2 -13  -2   9     7.90    -1.53     8.82 <
      2287    1   9   2   9     7.90    -1.53     8.82 <
      2288    2 -14  -2   9     3.78    -6.52     7.67 <
      2288    1  10   2   9     3.78    -6.52     7.67 <
      2289    2 -15  -2   9    20.96    20.71     8.82 <
      2289    1  11   2   9    20.96    20.71     8.82 <
      2290    2 -16  -2   9   151.12   149.22    11.89 o
      2290    1  12   2   9   151.12   149.22    11.89 o
      2291    2 -17  -2   9   123.08   139.24    11.89 o
      2291    1  13   2   9   123.08   139.24    11.89 o
      2292    2 -18  -2   9    13.66    31.84    11.12 <
      2292    1  14   2   9    13.66    31.84    11.12 <
      2293    2 -19  -2   9   203.94   216.73    19.95 o
      2293    1  15   2   9   203.94   216.73    19.95 o
      2294    2 -20  -2   9    47.86    43.35    14.96 <
      2294    1  16   2   9    47.86    43.35    14.96 <
      2295    2 -21  -2   9    14.39    16.11    14.19 <
      2295    1  17   2   9    14.39    16.11    14.19 <
      2296    2 -22  -2   9    48.81    40.66    15.73 <
      2296    1  18   2   9    48.81    40.66    15.73 <
      2297    2  17  -3   9     4.52    24.55    20.71 <
      2297    1 -21   3   9     4.52    24.55    20.71 <
      2298    2  16  -3   9    53.05    75.95    23.02 o
      2298    1 -20   3   9    53.05    75.95    23.02 o
      2299    2  15  -3   9    54.90    62.91    21.48 <
      2299    1 -19   3   9    54.90    62.91    21.48 <
      2300    2  14  -3   9    33.21   110.86    17.65 o
      2300    1 -18   3   9    33.21   110.86    17.65 o
      2301    2  13  -3   9    33.08    20.33    13.04 <
      2301    1 -17   3   9    33.08    20.33    13.04 <
      2302    2  12  -3   9    51.55    51.40    13.43 o
      2302    1 -16   3   9    51.55    51.40    13.43 o
      2303    2  11  -3   9    58.63   125.43    14.96 o
      2303    1 -15   3   9    58.63   125.43    14.96 o
      2304    2  10  -3   9   205.87   196.78    14.96 o
      2304    1 -14   3   9   205.87   196.78    14.96 o
      2305    2   9  -3   9   604.22   547.76    21.48 o
      2305    1 -13   3   9   604.22   547.76    21.48 o
      2306    2   8  -3   9   522.40   646.34    23.78 o
      2306    1 -12   3   9   522.40   646.34    23.78 o
      2307    2   7  -3   9   883.47   883.40    24.17 o
      2307    1 -11   3   9   883.47   883.40    24.17 o
      2308    2   6  -3   9   971.99   949.76    18.80 o
      2308    1 -10   3   9   971.99   949.76    18.80 o
      2309    2   5  -3   9   370.32   525.90    14.96 o
      2309    1  -9   3   9   370.32   525.90    14.96 o
      2310    2   3  -3   9   492.42   451.87    13.81 o
      2310    1  -7   3   9   492.42   451.87    13.81 o
      2311    2   2  -3   9  1114.26  1163.81    18.41 o
      2311    1  -6   3   9  1114.26  1163.81    18.41 o
      2312    2   1  -3   9   348.99   377.45    13.43 o
      2312    1  -5   3   9   348.99   377.45    13.43 o
      2313    2   0  -3   9   612.46   612.59    16.49 o
      2313    1  -4   3   9   612.46   612.59    16.49 o
      2314    2  -1  -3   9  2104.47  2240.15    27.23 o
      2314    1  -3   3   9  2104.47  2240.15    27.23 o
      2315    2  -2  -3   9  1545.51  1606.85    23.02 o
      2315    1  -2   3   9  1545.51  1606.85    23.02 o
      2316    2  -3  -3   9   632.88   664.37    16.88 o
      2316    1  -1   3   9   632.88   664.37    16.88 o
      2317    2  -4  -3   9   632.88   657.85    32.22 o
      2317    1   0   3   9   632.88   657.85    32.22 o
      2318    2  -5  -3   9  1480.68  1364.81    44.88 o
      2318    1   1   3   9  1480.68  1364.81    44.88 o
      2319    2  -6  -3   9  1251.87  1195.26    44.11 o
      2319    1   2   3   9  1251.87  1195.26    44.11 o
      2320    2  -7  -3   9  1040.25  1021.49    42.96 o
      2320    1   3   3   9  1040.25  1021.49    42.96 o
      2321    2  -8  -3   9  2137.07  2407.01    50.63 o
      2321    1   4   3   9  2137.07  2407.01    50.63 o
      2322    2  -9  -3   9  2187.25  2016.52    45.26 o
      2322    1   5   3   9  2187.25  2016.52    45.26 o
      2323    2 -10  -3   9  1592.37  1702.36    39.51 o
      2323    1   6   3   9  1592.37  1702.36    39.51 o
      2324    2 -11  -3   9  1355.74  1317.62    35.29 o
      2324    1   7   3   9  1355.74  1317.62    35.29 o
      2325    2 -12  -3   9   947.73  1044.13    34.91 o
      2325    1   8   3   9   947.73  1044.13    34.91 o
      2326    2 -13  -3   9   283.46   401.23    24.17 o
      2326    1   9   3   9   283.46   401.23    24.17 o
      2327    2 -14  -3   9   267.12   278.48    15.34 o
      2327    1  10   3   9   267.12   278.48    15.34 o
      2328    2 -15  -3   9   457.90   444.58    19.18 o
      2328    1  11   3   9   457.90   444.58    19.18 o
      2329    2 -16  -3   9   208.30   263.91    15.34 o
      2329    1  12   3   9   208.30   263.91    15.34 o
      2330    2 -17  -3   9   264.46   248.57    16.11 o
      2330    1  13   3   9   264.46   248.57    16.11 o
      2331    2 -18  -3   9   429.77   397.01    19.95 o
      2331    1  14   3   9   429.77   397.01    19.95 o
      2332    2 -19  -3   9   566.33   556.97    27.62 o
      2332    1  15   3   9   566.33   556.97    27.62 o
      2333    2 -20  -3   9   320.48   314.93    28.39 o
      2333    1  16   3   9   320.48   314.93    28.39 o
      2334    2 -21  -3   9    54.49    72.50    20.71 o
      2334    1  17   3   9    54.49    72.50    20.71 o
      2335    2  15  -4   9   115.47   135.79    19.56 o
      2335    1 -19   4   9   115.47   135.79    19.56 o
      2336    2  14  -4   9   470.71   478.33    29.15 o
      2336    1 -18   4   9   470.71   478.33    29.15 o
      2337    2  13  -4   9   607.38   549.68    29.54 o
      2337    1 -17   4   9   607.38   549.68    29.54 o
      2338    2  12  -4   9   255.19   260.46    21.86 o
      2338    1 -16   4   9   255.19   260.46    21.86 o
      2339    2  11  -4   9    96.24   117.76    17.65 o
      2339    1 -15   4   9    96.24   117.76    17.65 o
      2340    2  10  -4   9    40.83    44.88    13.81 o
      2340    1 -14   4   9    40.83    44.88    13.81 o
      2341    2   9  -4   9   143.45   143.85    16.49 o
      2341    1 -13   4   9   143.45   143.85    16.49 o
      2342    2   8  -4   9   362.03   406.22    22.63 o
      2342    1 -12   4   9   362.03   406.22    22.63 o
      2343    2   7  -4   9   761.50   665.14    25.70 o
      2343    1 -11   4   9   761.50   665.14    25.70 o
      2344    2   6  -4   9   920.77   872.28    28.77 o
      2344    1 -10   4   9   920.77   872.28    28.77 o
      2345    2   5  -4   9   392.72   390.49    18.03 o
      2345    1  -9   4   9   392.72   390.49    18.03 o
      2346    2   4  -4   9   279.84   301.50    16.88 o
      2346    1  -8   4   9   279.84   301.50    16.88 o
      2347    2   3  -4   9   302.62   307.64    17.26 o
      2347    1  -7   4   9   302.62   307.64    17.26 o
      2348    2   2  -4   9    29.10    26.08    10.36 <
      2348    1  -6   4   9    29.10    26.08    10.36 <
      2349    2   1  -4   9   211.49   208.29    12.66 o
      2349    1  -5   4   9   211.49   208.29    12.66 o
      2350    2   0  -4   9   581.20   704.27    19.95 o
      2350    1  -4   4   9   581.20   704.27    19.95 o
      2351    2  -1  -4   9  1260.53  1277.35    25.32 o
      2351    1  -3   4   9  1260.53  1277.35    25.32 o
      2352    2  -2  -4   9   409.64   406.99    16.88 o
      2352    1  -2   4   9   409.64   406.99    16.88 o
      2353    2  -3  -4   9  1657.93  1618.74    28.77 o
      2353    1  -1   4   9  1657.93  1618.74    28.77 o
      2354    2  -4  -4   9  2174.09  2008.08    31.84 o
      2354    1   0   4   9  2174.09  2008.08    31.84 o
      2355    2  -5  -4   9   405.08   390.88    16.88 o
      2355    1   1   4   9   405.08   390.88    16.88 o
      2356    2  -6  -4   9    22.22    10.74    11.89 <
      2356    1   2   4   9    22.22    10.74    11.89 <
      2357    2  -7  -4   9    15.91    18.80    19.95 <
      2357    1   3   4   9    15.91    18.80    19.95 <
      2358    2  -8  -4   9    12.07    14.58    18.41 <
      2358    1   4   4   9    12.07    14.58    18.41 <
      2359    2  -9  -4   9    14.96    31.45    12.66 <
      2359    1   5   4   9    14.96    31.45    12.66 <
      2360    2 -10  -4   9   112.75   128.50    14.19 o
      2360    1   6   4   9   112.75   128.50    14.19 o
      2361    2 -11  -4   9   328.15   326.43    26.85 o
      2361    1   7   4   9   328.15   326.43    26.85 o
      2362    2 -12  -4   9   223.49   230.92    24.93 o
      2362    1   8   4   9   223.49   230.92    24.93 o
      2363    2 -13  -4   9    34.83    35.67     8.82 o
      2363    1   9   4   9    34.83    35.67     8.82 o
      2364    2 -14  -4   9    39.40    43.73     9.97 o
      2364    1  10   4   9    39.40    43.73     9.97 o
      2365    2 -15  -4   9     6.31     2.30     9.97 <
      2365    1  11   4   9     6.31     2.30     9.97 <
      2366    2 -16  -4   9   240.90   250.87    16.11 o
      2366    1  12   4   9   240.90   250.87    16.11 o
      2367    2 -17  -4   9    31.12    61.37    12.66 o
      2367    1  13   4   9    31.12    61.37    12.66 o
      2368    2 -18  -4   9   158.76   172.62    14.96 o
      2368    1  14   4   9   158.76   172.62    14.96 o
      2369    2 -19  -4   9     6.70    23.02    16.11 <
      2369    1  15   4   9     6.70    23.02    16.11 <
      2370    2  13  -5   9    30.27    58.69    21.48 <
      2370    1 -17   5   9    30.27    58.69    21.48 <
      2371    2  12  -5   9    77.81   132.72    26.08 o
      2371    1 -16   5   9    77.81   132.72    26.08 o
      2372    2  11  -5   9    31.47    28.77    20.71 <
      2372    1 -15   5   9    31.47    28.77    20.71 <
      2373    2  10  -5   9     0.75     6.52    18.41 <
      2373    1 -14   5   9     0.75     6.52    18.41 <
      2374    2   9  -5   9    91.85    99.35    21.48 o
      2374    1 -13   5   9    91.85    99.35    21.48 o
      2375    2   8  -5   9   282.29   319.14    28.77 o
      2375    1 -12   5   9   282.29   319.14    28.77 o
      2376    2   7  -5   9   142.48   179.90    24.93 o
      2376    1 -11   5   9   142.48   179.90    24.93 o
      2377    2   6  -5   9    88.51   120.45    21.10 o
      2377    1 -10   5   9    88.51   120.45    21.10 o
      2378    2   5  -5   9    54.23    85.92    19.56 o
      2378    1  -9   5   9    54.23    85.92    19.56 o
      2379    2   4  -5   9    10.19     1.53    12.66 <
      2379    1  -8   5   9    10.19     1.53    12.66 <
      2380    2   3  -5   9    23.40    42.96    11.51 o
      2380    1  -7   5   9    23.40    42.96    11.51 o
      2381    2   2  -5   9    25.91    33.37    13.04 <
      2381    1  -6   5   9    25.91    33.37    13.04 <
      2382    2   1  -5   9   508.56   487.54    21.86 o
      2382    1  -5   5   9   508.56   487.54    21.86 o
      2383    2   0  -5   9  1594.54  1529.36    35.67 o
      2383    1  -4   5   9  1594.54  1529.36    35.67 o
      2384    2  -1  -5   9  1434.29  1365.96    35.67 o
      2384    1  -3   5   9  1434.29  1365.96    35.67 o
      2385    2  -2  -5   9   634.38   634.45    21.10 o
      2385    1  -2   5   9   634.38   634.45    21.10 o
      2386    2  -3  -5   9   917.30   942.47    26.08 o
      2386    1  -1   5   9   917.30   942.47    26.08 o
      2387    2  -4  -5   9   185.04   228.24    16.49 o
      2387    1   0   5   9   185.04   228.24    16.49 o
      2388    2  -5  -5   9   117.89   149.60    18.03 o
      2388    1   1   5   9   117.89   149.60    18.03 o
      2389    2  -6  -5   9     4.90    -1.53    12.66 <
      2389    1   2   5   9     4.90    -1.53    12.66 <
      2390    2  -7  -5   9    57.73    73.65    12.27 o
      2390    1   3   5   9    57.73    73.65    12.27 o
      2391    2  -8  -5   9   227.77   228.62    13.04 o
      2391    1   4   5   9   227.77   228.62    13.04 o
      2392    2  -9  -5   9   658.44   579.22    20.33 o
      2392    1   5   5   9   658.44   579.22    20.33 o
      2393    2 -10  -5   9   672.31   601.08    21.10 o
      2393    1   6   5   9   672.31   601.08    21.10 o
      2394    2 -11  -5   9   322.73   272.73    16.11 o
      2394    1   7   5   9   322.73   272.73    16.11 o
      2395    2 -12  -5   9   177.85   182.59    14.96 o
      2395    1   8   5   9   177.85   182.59    14.96 o
      2396    2 -13  -5   9   147.73   156.89    14.19 o
      2396    1   9   5   9   147.73   156.89    14.19 o
      2397    2 -14  -5   9    11.38    -5.75    10.36 <
      2397    1  10   5   9    11.38    -5.75    10.36 <
      2398    2 -15  -5   9    41.68    62.91    13.81 o
      2398    1  11   5   9    41.68    62.91    13.81 o
      2399    2 -16  -5   9   317.11   319.91    19.18 o
      2399    1  12   5   9   317.11   319.91    19.18 o
      2400    2 -17  -5   9   455.08   456.09    29.92 o
      2400    1  13   5   9   455.08   456.09    29.92 o
      2401    2   9  -6   9   266.35   266.21    30.69 o
      2401    1 -13   6   9   266.35   266.21    30.69 o
      2402    2   8  -6   9   202.20   221.33    29.54 o
      2402    1 -12   6   9   202.20   221.33    29.54 o
      2403    2   7  -6   9    88.14   104.72    24.17 o
      2403    1 -11   6   9    88.14   104.72    24.17 o
      2404    2   6  -6   9   128.89   109.32    25.70 o
      2404    1 -10   6   9   128.89   109.32    25.70 o
      2405    2   5  -6   9   277.32   256.24    29.15 o
      2405    1  -9   6   9   277.32   256.24    29.15 o
      2406    2   4  -6   9   280.31   297.28    31.07 o
      2406    1  -8   6   9   280.31   297.28    31.07 o
      2407    2   3  -6   9   713.47   756.43    42.96 o
      2407    1  -7   6   9   713.47   756.43    42.96 o
      2408    2   2  -6   9  1341.30  1188.35    36.82 o
      2408    1  -6   6   9  1341.30  1188.35    36.82 o
      2409    2   1  -6   9   872.45   760.27    25.32 o
      2409    1  -5   6   9   872.45   760.27    25.32 o
      2410    2   0  -6   9   405.85   421.18    21.10 o
      2410    1  -4   6   9   405.85   421.18    21.10 o
      2411    2  -1  -6   9   292.23   281.55    17.65 o
      2411    1  -3   6   9   292.23   281.55    17.65 o
      2412    2  -2  -6   9     5.26    -0.38    10.36 <
      2412    1  -2   6   9     5.26    -0.38    10.36 <
      2413    2  -3  -6   9    23.39    30.69    11.51 <
      2413    1  -1   6   9    23.39    30.69    11.51 <
      2414    2  -4  -6   9    59.21    56.77    12.66 o
      2414    1   0   6   9    59.21    56.77    12.66 o
      2415    2  -5  -6   9    41.51    99.35    15.34 o
      2415    1   1   6   9    41.51    99.35    15.34 o
      2416    2  -6  -6   9   220.25   283.47    19.95 o
      2416    1   2   6   9   220.25   283.47    19.95 o
      2417    2  -7  -6   9   676.29   646.34    27.23 o
      2417    1   3   6   9   676.29   646.34    27.23 o
      2418    2  -8  -6   9   339.17   335.26    26.47 o
      2418    1   4   6   9   339.17   335.26    26.47 o
      2419    2  -9  -6   9   250.87   247.03    18.03 o
      2419    1   5   6   9   250.87   247.03    18.03 o
      2420    2 -10  -6   9    77.55    74.42    14.19 o
      2420    1   6   6   9    77.55    74.42    14.19 o
      2421    2 -11  -6   9    63.01    94.75    15.34 o
      2421    1   7   6   9    63.01    94.75    15.34 o
      2422    2 -12  -6   9    20.70    28.39    19.18 <
      2422    1   8   6   9    20.70    28.39    19.18 <
      2423    2 -13  -6   9    13.22    36.82    19.18 <
      2423    1   9   6   9    13.22    36.82    19.18 <
      2424    2   2  -7   9    28.33    19.56    19.95 <
      2424    1  -6   7   9    28.33    19.56    19.95 <
      2425    2   1  -7   9    15.04    22.25    19.95 <
      2425    1  -5   7   9    15.04    22.25    19.95 <
      2426    2   0  -7   9    65.50    84.01    18.03 o
      2426    1  -4   7   9    65.50    84.01    18.03 o
      2427    2  -1  -7   9    70.78   116.61    18.80 o
      2427    1  -3   7   9    70.78   116.61    18.80 o
      2428    2  -2  -7   9   108.56   131.95    19.56 o
      2428    1  -2   7   9   108.56   131.95    19.56 o
      2429    2  -3  -7   9    20.84    39.51    13.04 o
      2429    1  -1   7   9    20.84    39.51    13.04 o
      2430    2  -4  -7   9     2.68    18.03    12.27 <
      2430    1   0   7   9     2.68    18.03    12.27 <
      2431    2  -5  -7   9    28.77    44.88    14.58 o
      2431    1   1   7   9    28.77    44.88    14.58 o
      2432    2  -6  -7   9     3.11    40.28    18.03 <
      2432    1   2   7   9     3.11    40.28    18.03 <
      2433    1 -23   0  10   159.37   114.31    51.40 <
      2434    1 -22   0  10    46.71   -12.27    44.88 <
      2435    1 -21   0  10   508.99   479.48    69.43 o
      2436    1 -20   0  10  1148.65  1209.45    94.75 o
      2437    1 -19   0  10   959.73   922.15    86.69 o
      2438    1 -18   0  10  2174.43  1858.48   104.72 o
      2439    1 -17   0  10  1170.39  1126.60    84.39 o
      2440    1 -14   0  10    25.90    34.52    14.58 <
      2441    1 -13   0  10    13.27     4.99    13.81 <
      2442    1 -12   0  10     3.67     6.90    14.19 <
      2443    1 -11   0  10   767.64   779.07    37.98 o
      2444    1 -10   0  10  2726.20  2805.94    47.95 o
      2445    1  -9   0  10  3710.13  3947.12    60.22 o
      2446    1  -8   0  10  1306.60  1185.67    26.85 o
      2447    1  -7   0  10   355.56   339.86    12.66 o
      2448    1  -6   0  10  2849.98  3540.52    53.70 o
      2449    1  -5   0  10    99.96    94.36     7.67 o
      2450    1  -4   0  10   202.26   212.51    10.36 o
      2451    1  -3   0  10  6348.68  7633.01    86.31 o
      2452    1  -2   0  10   686.97   635.22    15.73 o
      2453    1  -1   0  10  1228.56  1148.08    21.10 o
      2454    1   0   0  10  2389.73  2647.14    37.21 o
      2455    1   1   0  10   496.69   667.44    14.58 o
      2456    1   2   0  10  1311.26  1494.84    21.48 o
      2457    1   3   0  10   840.04   779.07    15.73 o
      2458    1   4   0  10   791.87   780.22    19.56 o
      2459    1   5   0  10   268.93   252.02    14.58 o
      2460    1   6   0  10   318.78   315.31    11.12 o
      2461    1   7   0  10   940.65   866.91    18.80 o
      2462    1   8   0  10  1811.80  1774.48    31.07 o
      2463    1   9   0  10    92.31    77.10     8.06 o
      2464    1  10   0  10     0.45    -6.14     6.52 <
      2465    1  11   0  10    30.34    24.17     8.06 o
      2466    1  12   0  10   940.64   970.86    34.91 o
      2467    1  13   0  10   842.02   838.52    34.91 o
      2468    1  14   0  10   117.10   139.63    19.18 o
      2469    1  15   0  10    23.66    26.47    15.73 <
      2470    1  16   0  10     1.27    13.04    16.11 <
      2471    1  17   0  10    22.59    25.70    31.84 <
      2472    1  18   0  10     4.47   -28.00    32.22 <
      2473    1  19   0  10    12.64    41.81    37.21 <
      2474    1 -23   1  10     5.34   -13.81    23.78 <
      2475    1 -22   1  10     3.18   -18.03    23.40 <
      2476    1 -21   1  10     0.70   -49.87    21.10 <
      2477    1 -20   1  10    49.74    36.44    21.86 <
      2478    1 -19   1  10     0.78   -13.04    18.41 <
      2479    1 -18   1  10    49.42    47.18    19.18 <
      2480    1 -17   1  10   269.40   274.65    27.62 o
      2481    1 -16   1  10  1083.18  1023.41    31.84 o
      2482    1 -15   1  10   678.92   632.15    25.32 o
      2483    1 -14   1  10   286.79   289.99    25.70 o
      2484    1 -13   1  10   150.04   158.04    19.95 o
      2485    1 -12   1  10     5.21    18.41    14.19 <
      2486    1 -11   1  10  1351.82  1372.86    30.30 o
      2487    1 -10   1  10  1507.59  1488.70    26.47 o
      2488    1  -9   1  10     2.35     6.14     7.29 <
      2489    1  -8   1  10   134.15   184.51     8.44 o
      2490    1  -7   1  10    43.52    49.10     6.14 o
      2491    1  -6   1  10  1755.13  1797.88    19.56 o
      2492    1  -5   1  10   365.89   350.60    10.36 o
      2493    1  -4   1  10  1258.03  1380.15    16.88 o
      2494    1  -3   1  10   281.49   260.84     8.82 o
      2495    1  -2   1  10     2.87     0.00     4.60 <
      2496    1  -1   1  10   946.84  1083.64    19.18 o
      2497    1   0   1  10   638.63   660.92    18.41 o
      2498    1   1   1  10  1025.20  1052.18    18.03 o
      2499    1   2   1  10  1261.58  1271.59    21.48 o
      2500    1   3   1  10    15.58     8.44     8.06 <
      2501    1   4   1  10    83.10    57.15     9.21 o
      2502    1   5   1  10     0.62    -4.99     7.67 <
      2503    1   6   1  10   652.30   623.33    18.03 o
      2504    1   7   1  10    21.39    23.02     5.37 o
      2505    1   8   1  10    89.33    68.28     5.75 o
      2506    1   9   1  10   233.61   228.24     9.21 o
      2507    1  10   1  10   189.96   201.77     8.82 o
      2508    1  11   1  10    44.06    47.18     6.90 o
      2509    1  12   1  10   195.73   191.79     9.59 o
      2510    1  13   1  10     7.39    19.56     6.52 <
      2511    1  14   1  10    81.22    76.33    10.74 o
      2512    1  15   1  10     3.32    19.18     9.97 <
      2513    1  16   1  10    34.02    35.29    10.36 o
      2514    1  17   1  10    47.13    70.58    18.80 o
      2515    1  18   1  10    22.99    34.91    18.03 <
      2516    1 -22   2  10     1.96   -54.85    23.78 <
      2517    1 -21   2  10    10.42   -25.32    19.95 <
      2518    1 -20   2  10    58.57    37.98    22.25 <
      2519    1 -19   2  10    54.67    56.77    21.48 <
      2520    1 -18   2  10   211.96   230.54    20.33 o
      2521    1 -17   2  10   874.52   837.76    31.45 o
      2522    1 -16   2  10   751.59   683.94    27.62 o
      2523    1 -15   2  10   954.73   808.22    28.77 o
      2524    1 -14   2  10   858.38   710.41    26.08 o
      2525    1 -13   2  10   541.19   464.91    21.48 o
      2526    1 -12   2  10  1211.07  1081.33    32.60 o
      2527    1 -11   2  10   965.36   850.80    22.25 o
      2528    1 -10   2  10  1090.16  1118.16    21.10 o
      2529    1  -9   2  10   568.66   609.14    13.43 o
      2530    1  -8   2  10   197.70   197.55     9.59 o
      2531    1  -7   2  10   600.72   589.96    14.19 o
      2532    1  -6   2  10   174.63   176.45     8.82 o
      2533    1  -5   2  10   495.05   554.67    11.89 o
      2534    1  -4   2  10    67.46    74.03     6.90 o
      2535    1  -3   2  10   159.75   202.53     9.21 o
      2536    1  -2   2  10    48.64    58.31     6.52 o
      2537    1  -1   2  10   564.10   585.35    16.11 o
      2538    1   0   2  10  1414.20  1489.09    28.39 o
      2539    1   1   2  10   505.03   476.42    16.11 o
      2540    1   2   2  10     5.62    13.81     7.29 <
      2541    1   3   2  10     0.12    -3.84     7.29 <
      2542    1   4   2  10   105.65   114.69    11.51 o
      2543    1   5   2  10    14.69    -6.52     9.21 <
      2544    1   6   2  10     0.76    -7.29     9.59 <
      2545    1   7   2  10   103.44   116.99    10.74 o
      2546    1   8   2  10     0.22    -2.30     8.06 <
      2547    1   9   2  10    37.56    35.29     9.97 o
      2548    1  10   2  10   135.37   129.65    10.36 o
      2549    1  11   2  10   103.71   124.28    11.51 o
      2550    1  12   2  10   359.71   354.05    15.73 o
      2551    1  13   2  10   186.79   224.40    15.34 o
      2552    1  14   2  10    10.67    15.73    10.74 <
      2553    1  15   2  10    37.07    52.55    14.96 o
      2554    1  16   2  10     8.22     3.07    13.81 <
      2555    1  17   2  10     0.80    12.66    14.58 <
      2556    1  18   2  10    40.71     2.69    15.73 <
      2557    1 -21   3  10    39.74    33.76    22.63 <
      2558    1 -20   3  10     7.09    10.36    20.71 <
      2559    1 -19   3  10    39.71    37.59    16.11 <
      2560    1 -18   3  10    11.19    -9.21    13.81 <
      2561    1 -17   3  10    88.10    74.03    15.73 o
      2562    1 -16   3  10   375.44   349.83    21.86 o
      2563    1 -15   3  10   612.95   553.52    23.78 o
      2564    1 -14   3  10    31.13    47.95    11.89 o
      2565    1 -13   3  10    88.90    88.23    13.04 o
      2566    1 -12   3  10    29.08    37.21    11.12 o
      2567    1 -11   3  10    33.24    29.54    10.74 <
      2568    1 -10   3  10   652.13   624.10    19.56 o
      2569    1  -9   3  10  1958.06  1777.93    32.60 o
      2570    1  -8   3  10  1602.91  1572.33    31.45 o
      2571    1  -7   3  10  3135.01  2936.75    35.67 o
      2572    1  -6   3  10  4213.92  4015.40    43.73 o
      2573    1  -5   3  10   188.69   169.93    10.74 o
      2574    1  -4   3  10    54.01    60.99     9.21 o
      2575    1  -3   3  10    32.17    39.51     8.06 o
      2576    1  -2   3  10   310.05   308.02    13.43 o
      2577    1  -1   3  10    74.73    61.76    10.74 o
      2578    1   0   3  10   463.55   466.06    29.92 o
      2579    1   1   3  10  2016.55  1873.83    51.78 o
      2580    1   2   3  10  2088.28  1848.51    71.35 o
      2581    1   3   3  10  1437.20  1413.90    52.17 o
      2582    1   4   3  10  1085.20  1032.62    34.52 o
      2583    1   5   3  10   375.25   348.30    24.93 o
      2584    1   6   3  10    11.70    28.77    13.81 <
      2585    1   7   3  10     2.61    30.30    14.96 <
      2586    1   8   3  10   441.55   505.57    28.39 o
      2587    1   9   3  10   363.27   370.16    24.55 o
      2588    1  10   3  10   403.50   423.10    31.07 o
      2589    1  11   3  10  1093.87  1062.15    28.00 o
      2590    1  12   3  10   232.94   221.33    16.11 o
      2591    1  13   3  10    73.95    69.43    14.96 o
      2592    1  14   3  10     0.70    14.58    12.27 <
      2593    1  15   3  10     2.61   -19.95    15.73 <
      2594    1  16   3  10    34.77    52.17    20.71 <
      2595    1 -19   4  10   224.66   209.05    28.39 o
      2596    1 -18   4  10    44.81    40.28    20.71 <
      2597    1 -17   4  10     7.84     6.52    19.18 <
      2598    1 -16   4  10   110.44   107.40    20.71 o
      2599    1 -15   4  10    42.57    24.55    16.11 <
      2600    1 -14   4  10   146.93   158.04    21.10 o
      2601    1 -13   4  10   538.95   530.89    29.92 o
      2602    1 -12   4  10   106.38   103.95    18.80 o
      2603    1 -11   4  10    73.59    78.25    16.11 o
      2604    1 -10   4  10    26.36    44.50    16.11 <
      2605    1  -9   4  10     5.21     7.67    11.12 <
      2606    1  -8   4  10    37.80    36.82    13.43 <
      2607    1  -7   4  10   691.54   652.87    22.63 o
      2608    1  -6   4  10   790.44   788.66    24.17 o
      2609    1  -5   4  10  1060.81  1053.33    24.55 o
      2610    1  -4   4  10  1701.51  1642.91    28.77 o
      2611    1  -3   4  10   104.70   109.71    11.51 o
      2612    1  -2   4  10     1.99     6.14    11.12 <
      2613    1  -1   4  10    69.40    73.65    12.66 o
      2614    1   0   4  10   457.32   471.05    21.10 o
      2615    1   1   4  10    13.42    14.19    15.34 <
      2616    1   2   4  10     2.74    21.10    28.00 <
      2617    1   3   4  10    82.00   107.79    35.29 o
      2618    1   4   4  10   178.85   186.42    35.29 o
      2619    1   5   4  10    68.84    50.63    13.81 o
      2620    1   6   4  10    19.15    11.12    11.89 <
      2621    1   7   4  10   147.05   141.16    20.71 o
      2622    1   8   4  10   117.77   131.19    22.25 o
      2623    1   9   4  10   131.35   131.95    23.40 o
      2624    1  10   4  10     0.40     5.37     9.97 <
      2625    1  11   4  10     0.78    -0.77    10.36 <
      2626    1  12   4  10    50.56    63.68    12.27 o
      2627    1  13   4  10    35.65    31.07    11.89 <
      2628    1  14   4  10    99.42   109.71    14.96 o
      2629    1  15   4  10    12.35    20.71    17.65 <
      2630    1 -17   5  10   354.04   367.48    33.76 o
      2631    1 -16   5  10   395.79   403.53    35.29 o
      2632    1 -15   5  10   339.90   367.48    34.14 o
      2633    1 -14   5  10   674.46   652.10    39.89 o
      2634    1 -13   5  10   160.08   130.42    24.55 o
      2635    1 -12   5  10   112.52   150.37    24.55 o
      2636    1 -11   5  10    81.99    57.54    20.33 <
      2637    1 -10   5  10    54.34    53.70    19.95 <
      2638    1  -9   5  10   164.79   192.56    24.55 o
      2639    1  -8   5  10   104.22   101.65    13.43 o
      2640    1  -7   5  10   583.99   536.26    23.78 o
      2641    1  -6   5  10  1238.94  1163.42    31.84 o
      2642    1  -5   5  10   748.75   691.61    26.85 o
      2643    1  -4   5  10   397.05   458.00    23.78 o
      2644    1  -3   5  10  1300.47  1254.72    34.52 o
      2645    1  -2   5  10  1050.81   950.15    26.85 o
      2646    1  -1   5  10   169.04   197.16    16.88 o
      2647    1   0   5  10  1125.20  1025.33    32.22 o
      2648    1   1   5  10  1031.80   887.62    29.15 o
      2649    1   2   5  10   505.67   528.20    27.62 o
      2650    1   3   5  10   649.75   628.70    18.41 o
      2651    1   4   5  10   287.29   293.45    18.03 o
      2652    1   5   5  10   379.18   347.15    16.88 o
      2653    1   6   5  10   194.28   172.62    14.58 o
      2654    1   7   5  10   174.16   178.75    15.34 o
      2655    1   8   5  10   397.30   366.71    18.41 o
      2656    1   9   5  10   359.08   376.30    19.18 o
      2657    1  10   5  10   276.61   271.58    17.65 o
      2658    1  11   5  10   335.86   301.88    18.41 o
      2659    1  12   5  10   333.70   348.68    20.33 o
      2660    1 -13   6  10   490.09   493.29    39.89 o
      2661    1 -12   6  10   273.98   240.51    30.69 o
      2662    1 -11   6  10     9.99    32.99    22.63 <
      2663    1 -10   6  10     8.41    12.66    20.71 <
      2664    1  -9   6  10     0.23    22.25    22.63 <
      2665    1  -8   6  10    73.78    78.25    22.63 o
      2666    1  -7   6  10     0.52   -26.47    16.88 <
      2667    1  -6   6  10   184.76   200.62    20.71 o
      2668    1  -5   6  10   260.35   209.44    17.26 o
      2669    1  -4   6  10    14.97     5.75    11.12 <
      2670    1  -3   6  10     7.07     5.37    11.12 <
      2671    1  -2   6  10     0.36     8.82    10.74 <
      2672    1  -1   6  10    17.92    25.70    12.66 <
      2673    1   0   6  10    64.98    99.73    15.34 o
      2674    1   1   6  10     0.87    11.12    12.66 <
      2675    1   2   6  10   251.07   264.29    20.71 o
      2676    1   3   6  10    75.59   103.57    19.18 o
      2677    1   4   6  10   117.51   122.36    14.96 o
      2678    1   5   6  10   112.72   108.56    14.19 o
      2679    1   6   6  10    53.28    60.22    14.19 o
      2680    1   7   6  10    89.99   123.13    15.73 o
      2681    1   8   6  10    88.05    82.86    15.34 o
      2682    1  -5   7  10   444.65   403.92    35.29 o
      2683    1  -4   7  10   499.12   498.28    30.30 o
      2684    1  -3   7  10   662.51   628.32    31.84 o
      2685    1  -2   7  10   748.58   756.43    28.39 o
      2686    1  -1   7  10   555.89   526.28    25.32 o
      2687    1   0   7  10   176.29   163.02    19.56 o
      2688    2  18  -1  11   526.91   479.87    55.62 o
      2688    1 -23   1  11   526.91   479.87    55.62 o
      2689    2  17  -1  11   323.87   259.30    46.80 o
      2689    1 -22   1  11   323.87   259.30    46.80 o
      2690    2  16  -1  11    44.94    -3.45    34.14 <
      2690    1 -21   1  11    44.94    -3.45    34.14 <
      2691    2  15  -1  11   188.11    97.81    38.36 <
      2691    1 -20   1  11   188.11    97.81    38.36 <
      2692    2  14  -1  11   119.35    83.62    39.13 <
      2692    1 -19   1  11   119.35    83.62    39.13 <
      2693    2  13  -1  11   108.26   131.19    24.17 o
      2693    1 -18   1  11   108.26   131.19    24.17 o
      2694    2  12  -1  11  1342.60  1355.22    51.40 o
      2694    1 -17   1  11  1342.60  1355.22    51.40 o
      2695    2  11  -1  11  2490.02  2538.58    52.94 o
      2695    1 -16   1  11  2490.02  2538.58    52.94 o
      2696    2  10  -1  11  1685.34  1768.72    41.43 o
      2696    1 -15   1  11  1685.34  1768.72    41.43 o
      2697    2   9  -1  11  2101.40  2148.86    58.31 o
      2697    1 -14   1  11  2101.40  2148.86    58.31 o
      2698    2   8  -1  11  2950.22  2815.15    66.74 o
      2698    1 -13   1  11  2950.22  2815.15    66.74 o
      2699    2   7  -1  11   706.14   770.63    34.91 o
      2699    1 -12   1  11   706.14   770.63    34.91 o
      2700    2   6  -1  11   259.46   291.91    15.34 o
      2700    1 -11   1  11   259.46   291.91    15.34 o
      2701    2   5  -1  11  1574.06  1766.04    30.30 o
      2701    1 -10   1  11  1574.06  1766.04    30.30 o
      2702    2   4  -1  11  2288.05  2467.62    26.47 o
      2702    1  -9   1  11  2288.05  2467.62    26.47 o
      2703    2   3  -1  11  3442.17  3745.74    34.91 o
      2703    1  -8   1  11  3442.17  3745.74    34.91 o
      2704    2   2  -1  11  4654.96  5102.10    43.35 o
      2704    1  -7   1  11  4654.96  5102.10    43.35 o
      2705    2   1  -1  11  8720.89  9446.23    76.72 o
      2705    1  -6   1  11  8720.89  9446.23    76.72 o
      2706    2   0  -1  11  6937.40  7523.31    63.29 o
      2706    1  -5   1  11  6937.40  7523.31    63.29 o
      2707    2  -1  -1  11  1730.91  1682.42    19.56 o
      2707    1  -4   1  11  1730.91  1682.42    19.56 o
      2708    2  -2  -1  11  3589.38  3654.82    34.14 o
      2708    1  -3   1  11  3589.38  3654.82    34.14 o
      2709    2  -3  -1  11  2387.02  2784.08    30.30 o
      2709    1  -2   1  11  2387.02  2784.08    30.30 o
      2710    2  -4  -1  11  1220.13  1215.97    18.41 o
      2710    1  -1   1  11  1220.13  1215.97    18.41 o
      2711    2  -5  -1  11  2952.04  3547.42    47.95 o
      2711    1   0   1  11  2952.04  3547.42    47.95 o
      2712    2  -6  -1  11  4732.92  5708.17    57.15 o
      2712    1   1   1  11  4732.92  5708.17    57.15 o
      2713    2  -7  -1  11  6473.64  6888.47    64.06 o
      2713    1   2   1  11  6473.64  6888.47    64.06 o
      2714    2  -8  -1  11  2765.17  2952.86    34.91 o
      2714    1   3   1  11  2765.17  2952.86    34.91 o
      2715    2  -9  -1  11  2370.10  2637.17    34.52 o
      2715    1   4   1  11  2370.10  2637.17    34.52 o
      2716    2 -10  -1  11  2676.95  2669.39    35.29 o
      2716    1   5   1  11  2676.95  2669.39    35.29 o
      2717    2 -11  -1  11   386.98   351.75    13.81 o
      2717    1   6   1  11   386.98   351.75    13.81 o
      2718    2 -12  -1  11   143.35   201.38     7.67 o
      2718    1   7   1  11   143.35   201.38     7.67 o
      2719    2 -13  -1  11  1244.40  1385.14    17.65 o
      2719    1   8   1  11  1244.40  1385.14    17.65 o
      2720    2 -14  -1  11  1829.54  1867.69    23.40 o
      2720    1   9   1  11  1829.54  1867.69    23.40 o
      2721    2 -15  -1  11   629.54   777.53    15.34 o
      2721    1  10   1  11   629.54   777.53    15.34 o
      2722    2 -16  -1  11  1206.25  1377.08    20.71 o
      2722    1  11   1  11  1206.25  1377.08    20.71 o
      2723    2 -17  -1  11  1363.45  1407.38    21.10 o
      2723    1  12   1  11  1363.45  1407.38    21.10 o
      2724    2 -18  -1  11    91.84   107.40     8.06 o
      2724    1  13   1  11    91.84   107.40     8.06 o
      2725    2 -19  -1  11    68.77    77.48    10.74 o
      2725    1  14   1  11    68.77    77.48    10.74 o
      2726    2 -20  -1  11    37.52    23.02     9.59 <
      2726    1  15   1  11    37.52    23.02     9.59 <
      2727    2 -21  -1  11     9.50    -8.06    14.19 <
      2727    1  16   1  11     9.50    -8.06    14.19 <
      2728    2 -22  -1  11   190.45   205.99    23.40 o
      2728    1  17   1  11   190.45   205.99    23.40 o
      2729    2 -23  -1  11   126.00   151.90    22.63 o
      2729    1  18   1  11   126.00   151.90    22.63 o
      2730    2  17  -2  11     9.40    15.73    23.40 <
      2730    1 -22   2  11     9.40    15.73    23.40 <
      2731    2  16  -2  11     9.40     3.84    22.25 <
      2731    1 -21   2  11     9.40     3.84    22.25 <
      2732    2  15  -2  11    40.31    21.48    20.71 <
      2732    1 -20   2  11    40.31    21.48    20.71 <
      2733    2  14  -2  11   130.69   159.57    26.08 o
      2733    1 -19   2  11   130.69   159.57    26.08 o
      2734    2  13  -2  11   264.54   284.62    23.02 o
      2734    1 -18   2  11   264.54   284.62    23.02 o
      2735    2  12  -2  11   287.58   324.52    23.40 o
      2735    1 -17   2  11   287.58   324.52    23.40 o
      2736    2  11  -2  11   104.41   138.86    16.88 o
      2736    1 -16   2  11   104.41   138.86    16.88 o
      2737    2  10  -2  11    69.22    59.84    13.43 o
      2737    1 -15   2  11    69.22    59.84    13.43 o
      2738    2   9  -2  11   126.20   128.88    13.81 o
      2738    1 -14   2  11   126.20   128.88    13.81 o
      2739    2   8  -2  11    36.62    52.94    13.43 o
      2739    1 -13   2  11    36.62    52.94    13.43 o
      2740    2   7  -2  11   517.32   499.05    25.70 o
      2740    1 -12   2  11   517.32   499.05    25.70 o
      2741    2   6  -2  11   101.77   127.74    11.51 o
      2741    1 -11   2  11   101.77   127.74    11.51 o
      2742    2   5  -2  11  2005.15  1858.48    27.62 o
      2742    1 -10   2  11  2005.15  1858.48    27.62 o
      2743    2   4  -2  11   175.49   181.44    11.12 o
      2743    1  -9   2  11   175.49   181.44    11.12 o
      2744    2   3  -2  11    10.43    21.10     6.52 o
      2744    1  -8   2  11    10.43    21.10     6.52 o
      2745    2   2  -2  11   755.41   749.53    14.58 o
      2745    1  -7   2  11   755.41   749.53    14.58 o
      2746    2   1  -2  11   784.40   777.92    14.19 o
      2746    1  -6   2  11   784.40   777.92    14.19 o
      2747    2   0  -2  11  1190.95  1248.58    22.25 o
      2747    1  -5   2  11  1190.95  1248.58    22.25 o
      2748    2  -1  -2  11   479.43   444.20    12.66 o
      2748    1  -4   2  11   479.43   444.20    12.66 o
      2749    2  -2  -2  11   251.61   264.68    10.74 o
      2749    1  -3   2  11   251.61   264.68    10.74 o
      2750    2  -3  -2  11   170.82   204.84    10.36 o
      2750    1  -2   2  11   170.82   204.84    10.36 o
      2751    2  -4  -2  11   104.26   123.13    13.43 o
      2751    1  -1   2  11   104.26   123.13    13.43 o
      2752    2  -5  -2  11  1129.02  1172.63    25.32 o
      2752    1   0   2  11  1129.02  1172.63    25.32 o
      2753    2  -6  -2  11   228.10   225.93    13.43 o
      2753    1   1   2  11   228.10   225.93    13.43 o
      2754    2  -7  -2  11   589.72   610.29    21.10 o
      2754    1   2   2  11   589.72   610.29    21.10 o
      2755    2  -8  -2  11   281.23   272.35    14.96 o
      2755    1   3   2  11   281.23   272.35    14.96 o
      2756    2  -9  -2  11   427.33   428.85    17.65 o
      2756    1   4   2  11   427.33   428.85    17.65 o
      2757    2 -10  -2  11  1037.77  1044.89    24.93 o
      2757    1   5   2  11  1037.77  1044.89    24.93 o
      2758    2 -11  -2  11   380.76   409.29    18.41 o
      2758    1   6   2  11   380.76   409.29    18.41 o
      2759    2 -12  -2  11   391.62   375.92    14.96 o
      2759    1   7   2  11   391.62   375.92    14.96 o
      2760    2 -13  -2  11   120.86   118.91    11.89 o
      2760    1   8   2  11   120.86   118.91    11.89 o
      2761    2 -14  -2  11     4.80     9.97     9.59 <
      2761    1   9   2  11     4.80     9.97     9.59 <
      2762    2 -15  -2  11    67.03    66.74     8.82 o
      2762    1  10   2  11    67.03    66.74     8.82 o
      2763    2 -16  -2  11   209.45   206.37    12.27 o
      2763    1  11   2  11   209.45   206.37    12.27 o
      2764    2 -17  -2  11   169.63   188.73    13.81 o
      2764    1  12   2  11   169.63   188.73    13.81 o
      2765    2 -18  -2  11   295.12   314.54    16.49 o
      2765    1  13   2  11   295.12   314.54    16.49 o
      2766    2 -19  -2  11   430.62   427.70    18.41 o
      2766    1  14   2  11   430.62   427.70    18.41 o
      2767    2 -20  -2  11    29.55    15.34    13.43 <
      2767    1  15   2  11    29.55    15.34    13.43 <
      2768    2 -21  -2  11     3.07    11.89    12.66 <
      2768    1  16   2  11     3.07    11.89    12.66 <
      2769    2 -22  -2  11     0.44    -4.99    12.27 <
      2769    1  17   2  11     0.44    -4.99    12.27 <
      2770    2  16  -3  11   379.47   386.27    35.67 o
      2770    1 -21   3  11   379.47   386.27    35.67 o
      2771    2  15  -3  11   243.01   177.22    26.08 o
      2771    1 -20   3  11   243.01   177.22    26.08 o
      2772    2  14  -3  11   453.93   472.20    28.39 o
      2772    1 -19   3  11   453.93   472.20    28.39 o
      2773    2  13  -3  11   486.32   489.07    27.23 o
      2773    1 -18   3  11   486.32   489.07    27.23 o
      2774    2  12  -3  11    67.28    70.96    14.96 o
      2774    1 -17   3  11    67.28    70.96    14.96 o
      2775    2  11  -3  11   180.36   218.26    19.18 o
      2775    1 -16   3  11   180.36   218.26    19.18 o
      2776    2  10  -3  11   565.36   573.08    27.23 o
      2776    1 -15   3  11   565.36   573.08    27.23 o
      2777    2   9  -3  11   555.61   505.95    24.17 o
      2777    1 -14   3  11   555.61   505.95    24.17 o
      2778    2   8  -3  11   586.04   588.04    24.93 o
      2778    1 -13   3  11   586.04   588.04    24.93 o
      2779    2   7  -3  11  1765.82  1708.50    35.67 o
      2779    1 -12   3  11  1765.82  1708.50    35.67 o
      2780    2   6  -3  11  1610.11  1500.21    31.84 o
      2780    1 -11   3  11  1610.11  1500.21    31.84 o
      2781    2   5  -3  11  1859.93  1720.77    33.37 o
      2781    1 -10   3  11  1859.93  1720.77    33.37 o
      2782    2   4  -3  11  1883.37  1812.07    34.14 o
      2782    1  -9   3  11  1883.37  1812.07    34.14 o
      2783    2   3  -3  11   195.09   283.86    16.49 o
      2783    1  -8   3  11   195.09   283.86    16.49 o
      2784    2   2  -3  11  1698.49  1670.91    28.00 o
      2784    1  -7   3  11  1698.49  1670.91    28.00 o
      2785    2   1  -3  11  1617.15  1681.65    32.99 o
      2785    1  -6   3  11  1617.15  1681.65    32.99 o
      2786    2   0  -3  11   463.62   538.56    20.71 o
      2786    1  -5   3  11   463.62   538.56    20.71 o
      2787    2  -1  -3  11  3050.90  3158.08    39.13 o
      2787    1  -4   3  11  3050.90  3158.08    39.13 o
      2788    2  -2  -3  11  2375.18  2447.29    34.52 o
      2788    1  -3   3  11  2375.18  2447.29    34.52 o
      2789    2  -3  -3  11  3200.45  3292.72    41.81 o
      2789    1  -2   3  11  3200.45  3292.72    41.81 o
      2790    2  -4  -3  11  2898.76  3034.95    52.94 o
      2790    1  -1   3  11  2898.76  3034.95    52.94 o
      2791    2  -5  -3  11   701.67   585.35    45.26 o
      2791    1   0   3  11   701.67   585.35    45.26 o
      2792    2  -6  -3  11  1354.76  1411.99    60.22 o
      2792    1   1   3  11  1354.76  1411.99    60.22 o
      2793    2  -7  -3  11   992.13  1000.78    59.46 o
      2793    1   2   3  11   992.13  1000.78    59.46 o
      2794    2  -8  -3  11   670.00   723.06    59.07 o
      2794    1   3   3  11   670.00   723.06    59.07 o
      2795    2  -9  -3  11   578.17   821.26    43.73 o
      2795    1   4   3  11   578.17   821.26    43.73 o
      2796    2 -10  -3  11  1272.20  1121.23    41.43 o
      2796    1   5   3  11  1272.20  1121.23    41.43 o
      2797    2 -11  -3  11  1647.78  1823.96    52.94 o
      2797    1   6   3  11  1647.78  1823.96    52.94 o
      2798    2 -12  -3  11   845.16   928.67    40.28 o
      2798    1   7   3  11   845.16   928.67    40.28 o
      2799    2 -13  -3  11   768.26   834.30    41.04 o
      2799    1   8   3  11   768.26   834.30    41.04 o
      2800    2 -14  -3  11   170.94   192.18    25.32 o
      2800    1   9   3  11   170.94   192.18    25.32 o
      2801    2 -15  -3  11   367.87   383.59    30.30 o
      2801    1  10   3  11   367.87   383.59    30.30 o
      2802    2 -16  -3  11   215.78   209.82    16.49 o
      2802    1  11   3  11   215.78   209.82    16.49 o
      2803    2 -17  -3  11     5.03    38.36    14.19 <
      2803    1  12   3  11     5.03    38.36    14.19 <
      2804    2 -18  -3  11   400.87   411.59    21.86 o
      2804    1  13   3  11   400.87   411.59    21.86 o
      2805    2 -19  -3  11   204.29   246.65    18.41 o
      2805    1  14   3  11   204.29   246.65    18.41 o
      2806    2 -20  -3  11   130.24   136.17    23.02 o
      2806    1  15   3  11   130.24   136.17    23.02 o
      2807    2 -21  -3  11   323.68   346.38    28.77 o
      2807    1  16   3  11   323.68   346.38    28.77 o
      2808    2  14  -4  11    39.56    56.77    22.25 <
      2808    1 -19   4  11    39.56    56.77    22.25 <
      2809    2  13  -4  11   205.49   225.55    28.77 o
      2809    1 -18   4  11   205.49   225.55    28.77 o
      2810    2  12  -4  11   101.12   109.32    22.25 o
      2810    1 -17   4  11   101.12   109.32    22.25 o
      2811    2  11  -4  11    84.06    51.02    19.56 <
      2811    1 -16   4  11    84.06    51.02    19.56 <
      2812    2  10  -4  11     0.95   -14.19    16.49 <
      2812    1 -15   4  11     0.95   -14.19    16.49 <
      2813    2   9  -4  11   149.52   182.20    23.02 o
      2813    1 -14   4  11   149.52   182.20    23.02 o
      2814    2   8  -4  11   108.30   103.18    20.71 o
      2814    1 -13   4  11   108.30   103.18    20.71 o
      2815    2   7  -4  11    42.20    46.41    16.88 <
      2815    1 -12   4  11    42.20    46.41    16.88 <
      2816    2   6  -4  11   167.01   232.84    23.40 o
      2816    1 -11   4  11   167.01   232.84    23.40 o
      2817    2   5  -4  11   262.94   318.38    24.17 o
      2817    1 -10   4  11   262.94   318.38    24.17 o
      2818    2   4  -4  11   161.42   219.80    19.18 o
      2818    1  -9   4  11   161.42   219.80    19.18 o
      2819    2   3  -4  11   226.96   330.65    21.10 o
      2819    1  -8   4  11   226.96   330.65    21.10 o
      2820    2   2  -4  11    79.67    79.79    14.58 o
      2820    1  -7   4  11    79.67    79.79    14.58 o
      2821    2   1  -4  11   267.79   299.20    18.80 o
      2821    1  -6   4  11   267.79   299.20    18.80 o
      2822    2   0  -4  11  1850.64  1733.43    29.92 o
      2822    1  -5   4  11  1850.64  1733.43    29.92 o
      2823    2  -1  -4  11   162.48   189.88    14.96 o
      2823    1  -4   4  11   162.48   189.88    14.96 o
      2824    2  -2  -4  11    21.43    33.76    12.27 <
      2824    1  -3   4  11    21.43    33.76    12.27 <
      2825    2  -3  -4  11   137.98   143.46    16.11 o
      2825    1  -2   4  11   137.98   143.46    16.11 o
      2826    2  -4  -4  11   290.58   321.06    23.78 o
      2826    1  -1   4  11   290.58   321.06    23.78 o
      2827    2  -5  -4  11   314.99   407.75    25.32 o
      2827    1   0   4  11   314.99   407.75    25.32 o
      2828    2  -6  -4  11   142.85   169.55    19.56 o
      2828    1   1   4  11   142.85   169.55    19.56 o
      2829    2  -7  -4  11    98.71    90.91    36.44 <
      2829    1   2   4  11    98.71    90.91    36.44 <
      2830    2  -8  -4  11  1019.03   966.26    67.51 o
      2830    1   3   4  11  1019.03   966.26    67.51 o
      2831    2  -9  -4  11   481.38   456.47    54.47 o
      2831    1   4   4  11   481.38   456.47    54.47 o
      2832    2 -10  -4  11   757.85   761.80    45.26 o
      2832    1   5   4  11   757.85   761.80    45.26 o
      2833    2 -11  -4  11   227.50   222.87    32.22 o
      2833    1   6   4  11   227.50   222.87    32.22 o
      2834    2 -12  -4  11     5.47     1.15    15.34 <
      2834    1   7   4  11     5.47     1.15    15.34 <
      2835    2 -13  -4  11     6.30     2.30    18.03 <
      2835    1   8   4  11     6.30     2.30    18.03 <
      2836    2 -14  -4  11   113.21   128.50    24.17 o
      2836    1   9   4  11   113.21   128.50    24.17 o
      2837    2 -15  -4  11     0.62    30.30    21.86 <
      2837    1  10   4  11     0.62    30.30    21.86 <
      2838    2 -16  -4  11   119.76   126.97    13.81 o
      2838    1  11   4  11   119.76   126.97    13.81 o
      2839    2 -17  -4  11   331.15   317.61    18.03 o
      2839    1  12   4  11   331.15   317.61    18.03 o
      2840    2 -18  -4  11   272.58   276.57    17.65 o
      2840    1  13   4  11   272.58   276.57    17.65 o
      2841    2 -19  -4  11   144.55   141.93    16.11 o
      2841    1  14   4  11   144.55   141.93    16.11 o
      2842    2  12  -5  11   131.53   120.83    26.85 o
      2842    1 -17   5  11   131.53   120.83    26.85 o
      2843    2  11  -5  11    15.33    18.03    21.10 <
      2843    1 -16   5  11    15.33    18.03    21.10 <
      2844    2  10  -5  11    68.40    48.72    21.10 <
      2844    1 -15   5  11    68.40    48.72    21.10 <
      2845    2   9  -5  11     4.66     4.22    20.33 <
      2845    1 -14   5  11     4.66     4.22    20.33 <
      2846    2   8  -5  11   143.59   158.80    25.70 o
      2846    1 -13   5  11   143.59   158.80    25.70 o
      2847    2   7  -5  11   940.90   948.23    45.65 o
      2847    1 -12   5  11   940.90   948.23    45.65 o
      2848    2   6  -5  11   530.96   552.75    37.21 o
      2848    1 -11   5  11   530.96   552.75    37.21 o
      2849    2   5  -5  11   471.19   619.11    38.36 o
      2849    1 -10   5  11   471.19   619.11    38.36 o
      2850    2   4  -5  11   802.88   754.52    40.28 o
      2850    1  -9   5  11   802.88   754.52    40.28 o
      2851    2   3  -5  11   369.09   386.66    26.47 o
      2851    1  -8   5  11   369.09   386.66    26.47 o
      2852    2   2  -5  11     8.31     9.21    13.04 <
      2852    1  -7   5  11     8.31     9.21    13.04 <
      2853    2   1  -5  11    34.27    50.25    14.19 o
      2853    1  -6   5  11    34.27    50.25    14.19 o
      2854    2   0  -5  11   327.81   400.85    23.78 o
      2854    1  -5   5  11   327.81   400.85    23.78 o
      2855    2  -1  -5  11   595.10   655.55    26.85 o
      2855    1  -4   5  11   595.10   655.55    26.85 o
      2856    2  -2  -5  11   877.99   906.03    26.08 o
      2856    1  -3   5  11   877.99   906.03    26.08 o
      2857    2  -3  -5  11   654.22   707.34    26.85 o
      2857    1  -2   5  11   654.22   707.34    26.85 o
      2858    2  -4  -5  11  1116.29  1039.14    31.84 o
      2858    1  -1   5  11  1116.29  1039.14    31.84 o
      2859    2  -5  -5  11   415.40   419.64    25.32 o
      2859    1   0   5  11   415.40   419.64    25.32 o
      2860    2  -6  -5  11    12.96    13.43    16.49 <
      2860    1   1   5  11    12.96    13.43    16.49 <
      2861    2  -7  -5  11   160.40   129.65    16.49 o
      2861    1   2   5  11   160.40   129.65    16.49 o
      2862    2  -8  -5  11    41.37    75.18    17.65 o
      2862    1   3   5  11    41.37    75.18    17.65 o
      2863    2  -9  -5  11   236.68   257.77    13.43 o
      2863    1   4   5  11   236.68   257.77    13.43 o
      2864    2 -10  -5  11   763.22   801.32    32.60 o
      2864    1   5   5  11   763.22   801.32    32.60 o
      2865    2 -11  -5  11   336.11   356.74    17.26 o
      2865    1   6   5  11   336.11   356.74    17.26 o
      2866    2 -12  -5  11   440.92   463.37    19.56 o
      2866    1   7   5  11   440.92   463.37    19.56 o
      2867    2 -13  -5  11   230.52   217.88    14.96 o
      2867    1   8   5  11   230.52   217.88    14.96 o
      2868    2 -14  -5  11    67.45    89.38    13.81 o
      2868    1   9   5  11    67.45    89.38    13.81 o
      2869    2 -15  -5  11    18.01    27.23    11.89 <
      2869    1  10   5  11    18.01    27.23    11.89 <
      2870    2 -16  -5  11    12.11    19.56    12.66 <
      2870    1  11   5  11    12.11    19.56    12.66 <
      2871    2 -17  -5  11    66.52    48.72    13.04 o
      2871    1  12   5  11    66.52    48.72    13.04 o
      2872    2   8  -6  11    59.24   135.41    30.69 o
      2872    1 -13   6  11    59.24   135.41    30.69 o
      2873    2   7  -6  11    16.59    42.96    24.17 <
      2873    1 -12   6  11    16.59    42.96    24.17 <
      2874    2   6  -6  11     6.43     4.60    21.10 <
      2874    1 -11   6  11     6.43     4.60    21.10 <
      2875    2   5  -6  11    19.09     1.53    21.48 <
      2875    1 -10   6  11    19.09     1.53    21.48 <
      2876    2   4  -6  11    41.74    34.52    23.78 <
      2876    1  -9   6  11    41.74    34.52    23.78 <
      2877    2   3  -6  11    95.91    60.99    22.25 <
      2877    1  -8   6  11    95.91    60.99    22.25 <
      2878    2   2  -6  11    11.24    42.96    21.86 <
      2878    1  -7   6  11    11.24    42.96    21.86 <
      2879    2   1  -6  11    66.02    70.58    13.81 o
      2879    1  -6   6  11    66.02    70.58    13.81 o
      2880    2   0  -6  11    70.60    90.53    14.19 o
      2880    1  -5   6  11    70.60    90.53    14.19 o
      2881    2  -1  -6  11    17.25    43.35    12.66 o
      2881    1  -4   6  11    17.25    43.35    12.66 o
      2882    2  -2  -6  11     9.45    26.08    11.51 <
      2882    1  -3   6  11     9.45    26.08    11.51 <
      2883    2  -3  -6  11    52.22    78.25    14.96 o
      2883    1  -2   6  11    52.22    78.25    14.96 o
      2884    2  -4  -6  11   271.46   289.99    21.48 o
      2884    1  -1   6  11   271.46   289.99    21.48 o
      2885    2  -5  -6  11   194.46   201.00    18.80 o
      2885    1   0   6  11   194.46   201.00    18.80 o
      2886    2  -6  -6  11   249.91   235.14    19.56 o
      2886    1   1   6  11   249.91   235.14    19.56 o
      2887    2  -7  -6  11    73.79    85.92    15.34 o
      2887    1   2   6  11    73.79    85.92    15.34 o
      2888    2  -8  -6  11     4.84     7.29    10.74 <
      2888    1   3   6  11     4.84     7.29    10.74 <
      2889    2  -9  -6  11     3.33    -2.30    11.51 <
      2889    1   4   6  11     3.33    -2.30    11.51 <
      2890    2 -10  -6  11    14.99    34.14    12.66 <
      2890    1   5   6  11    14.99    34.14    12.66 <
      2891    2 -11  -6  11    80.74    87.46    14.58 o
      2891    1   6   6  11    80.74    87.46    14.58 o
      2892    2 -12  -6  11   146.71   157.27    16.49 o
      2892    1   7   6  11   146.71   157.27    16.49 o
      2893    2 -13  -6  11    61.56    60.61    14.58 o
      2893    1   8   6  11    61.56    60.61    14.58 o
      2894    1 -23   0  12     5.04   -79.79    44.50 <
      2895    1 -22   0  12   142.21   116.61    52.94 <
      2896    1 -21   0  12    55.03    74.42    48.72 <
      2897    1 -20   0  12    11.69   -18.03    42.19 <
      2898    1 -19   0  12    30.21   -19.56    40.28 <
      2899    1 -18   0  12   175.09   133.49    45.65 <
      2900    1 -11   0  12   396.99   365.94    37.98 o
      2901    1 -10   0  12   146.16   181.82    13.04 o
      2902    1  -9   0  12  1090.56  1112.02    29.15 o
      2903    1  -8   0  12   133.90   146.53    11.12 o
      2904    1  -7   0  12  1067.47  1155.75    25.70 o
      2905    1  -6   0  12   420.03   379.75    14.19 o
      2906    1  -5   0  12  6754.27  6936.80    82.86 o
      2907    1  -4   0  12  7325.85  7508.35    88.23 o
      2908    1  -3   0  12 10498.20 10912.70   122.36 o
      2909    1  -2   0  12  2685.10  2822.44    41.04 o
      2910    1  -1   0  12  1538.71  1696.99    29.92 o
      2911    1   0   0  12   214.17   215.58    13.04 o
      2912    1   1   0  12    63.25    62.91     8.06 o
      2913    1   2   0  12  1665.28  1644.44    24.17 o
      2914    1   3   0  12   712.80   691.99    23.40 o
      2915    1   4   0  12  6475.78  6053.40    80.94 o
      2916    1   5   0  12  5292.24  5003.90    71.73 o
      2917    1   6   0  12  3972.32  3690.11    59.07 o
      2918    1   7   0  12  2037.86  2013.84    33.76 o
      2919    1   8   0  12   292.64   264.29    12.27 o
      2920    1   9   0  12   203.25   199.08    12.27 o
      2921    1  10   0  12    73.31    94.36    10.36 o
      2922    1  11   0  12    11.63    15.34    11.51 <
      2923    1  12   0  12  1419.28  1395.11    43.73 o
      2924    1  13   0  12  1271.43  1289.62    44.11 o
      2925    1  14   0  12  1730.88  1693.54    51.40 o
      2926    1  15   0  12   718.04   771.78    38.74 o
      2927    1  16   0  12    89.91   123.51    22.25 o
      2928    1  17   0  12    43.68    64.44    36.06 <
      2929    1 -23   1  12    17.85   -41.43    34.14 <
      2930    1 -22   1  12     3.45   -78.64    31.45 <
      2931    1 -21   1  12    89.64    49.48    33.37 <
      2932    1 -20   1  12    16.72   -29.54    32.22 <
      2933    1 -19   1  12    17.16   -14.96    31.45 <
      2934    1 -18   1  12     6.92   -47.56    26.85 <
      2935    1 -17   1  12   221.15   256.24    27.62 o
      2936    1 -16   1  12   112.05   130.04    21.10 o
      2937    1 -15   1  12   113.61    72.11    32.60 <
      2938    1 -14   1  12     4.46    14.96    16.11 <
      2939    1 -13   1  12    68.38    86.31    15.34 o
      2940    1 -12   1  12    84.04    82.86    14.96 o
      2941    1 -11   1  12   817.13   751.07    20.71 o
      2942    1 -10   1  12    75.95    88.23    11.12 o
      2943    1  -9   1  12   227.90   216.34    11.12 o
      2944    1  -8   1  12    16.23     2.30     4.99 <
      2945    1  -7   1  12   339.99   323.36     9.97 o
      2946    1  -6   1  12    16.96    26.47     6.14 o
      2947    1  -5   1  12   660.88   658.24    13.04 o
      2948    1  -4   1  12    16.37    14.19     4.99 <
      2949    1  -3   1  12   356.03   391.64    10.74 o
      2950    1  -2   1  12   538.06   519.76    13.43 o
      2951    1  -1   1  12    55.93    52.55     7.29 o
      2952    1   0   1  12   919.07   978.15    20.33 o
      2953    1   1   1  12    10.11     9.21     8.44 <
      2954    1   2   1  12    72.65    67.89     9.21 o
      2955    1   3   1  12   473.89   475.65    16.11 o
      2956    1   4   1  12    81.76   103.57    11.12 o
      2957    1   5   1  12   269.51   294.98    15.73 o
      2958    1   6   1  12  1098.40   968.18    23.02 o
      2959    1   7   1  12   118.00   113.93     6.52 o
      2960    1   8   1  12   373.52   345.61    10.36 o
      2961    1   9   1  12     1.04    -4.60     5.37 <
      2962    1  10   1  12   414.03   365.56    11.51 o
      2963    1  11   1  12     6.91     6.90     5.75 <
      2964    1  12   1  12     9.89    22.25     6.52 o
      2965    1  13   1  12    14.29     0.77     7.29 <
      2966    1  14   1  12    71.16    50.25     9.97 o
      2967    1  15   1  12     1.44    16.49    15.34 <
      2968    1  16   1  12     0.24   -21.48    14.19 <
      2969    1  17   1  12    36.47    37.59    17.26 <
      2970    1 -22   2  12    22.66   -28.77    22.63 <
      2971    1 -21   2  12    54.01    47.95    23.02 <
      2972    1 -20   2  12     0.89   -10.74    19.56 <
      2973    1 -19   2  12     1.19    -5.75    18.03 <
      2974    1 -18   2  12     0.69   -11.12    13.43 <
      2975    1 -17   2  12    45.17    47.56    14.96 o
      2976    1 -16   2  12    34.27    44.88    13.04 o
      2977    1 -15   2  12    12.90    25.70    11.89 <
      2978    1 -14   2  12    59.53    51.02    12.66 o
      2979    1 -13   2  12    17.86    23.78    13.04 <
      2980    1 -12   2  12   455.68   456.85    25.70 o
      2981    1 -11   2  12    43.54    63.68     9.59 o
      2982    1 -10   2  12    91.75   103.57     9.97 o
      2983    1  -9   2  12  1158.98   941.71    22.63 o
      2984    1  -8   2  12   224.93   245.11    12.27 o
      2985    1  -7   2  12  1115.04  1110.87    20.71 o
      2986    1  -6   2  12  1074.32  1044.13    19.95 o
      2987    1  -5   2  12  1319.98  1402.78    20.71 o
      2988    1  -4   2  12  1415.31  1465.69    22.25 o
      2989    1  -3   2  12    59.55    73.27     8.44 o
      2990    1  -2   2  12   557.74   536.64    15.73 o
      2991    1  -1   2  12   368.77   327.20    17.65 o
      2992    1   0   2  12   809.22   762.96    29.15 o
      2993    1   1   2  12   321.83   324.90    21.48 o
      2994    1   2   2  12   486.21   484.47    21.86 o
      2995    1   3   2  12  3281.15  3184.55    39.89 o
      2996    1   4   2  12   525.07   568.09    19.18 o
      2997    1   5   2  12   883.56   886.47    24.55 o
      2998    1   6   2  12  1118.71   986.20    26.85 o
      2999    1   7   2  12   571.96   570.78    18.03 o
      3000    1   8   2  12  1246.36  1157.67    24.17 o
      3001    1   9   2  12   191.15   159.96    17.26 o
      3002    1  10   2  12   852.25   822.41    19.95 o
      3003    1  11   2  12   987.35   937.10    21.10 o
      3004    1  12   2  12   244.12   243.58    13.81 o
      3005    1  13   2  12   505.70   464.91    18.41 o
      3006    1  14   2  12   237.15   226.32    18.03 o
      3007    1  15   2  12   189.06   202.15    17.65 o
      3008    1  16   2  12   128.38   125.43    14.96 o
      3009    1  17   2  12   160.53   165.71    15.73 o
      3010    1 -21   3  12    53.37    85.16    26.47 o
      3011    1 -20   3  12     4.13    -2.30    17.65 <
      3012    1 -19   3  12   100.72    80.94    17.65 o
      3013    1 -18   3  12     0.99     8.06    14.19 <
      3014    1 -17   3  12    70.13    74.03    14.96 o
      3015    1 -16   3  12   486.82   443.81    24.55 o
      3016    1 -15   3  12   955.44   780.22    28.39 o
      3017    1 -14   3  12   963.31   770.63    25.70 o
      3018    1 -13   3  12   871.59   742.63    27.62 o
      3019    1 -12   3  12   240.55   254.70    18.41 o
      3020    1 -11   3  12     4.90     3.45    12.27 <
      3021    1 -10   3  12     5.10     4.99     8.82 <
      3022    1  -9   3  12   410.82   375.53    18.41 o
      3023    1  -8   3  12    79.26    75.95    14.58 o
      3024    1  -7   3  12  1202.36  1184.14    29.54 o
      3025    1  -6   3  12  2692.65  2549.32    43.73 o
      3026    1  -5   3  12   387.13   405.84    18.03 o
      3027    1  -4   3  12   309.27   315.31    17.65 o
      3028    1  -3   3  12   106.50   123.13    11.89 o
      3029    1  -2   3  12    49.42    51.40    11.12 o
      3030    1  -1   3  12     2.88    25.32    25.70 <
      3031    1   0   3  12    67.51    98.20    31.84 o
      3032    1   1   3  12  1817.93  1633.32    67.13 o
      3033    1   2   3  12  2190.34  2038.39    81.32 o
      3034    1   3   3  12   996.65   967.41    64.44 o
      3035    1   4   3  12  1115.34  1186.82    62.91 o
      3036    1   5   3  12    75.84    58.69    21.10 <
      3037    1   6   3  12    62.18    34.91    22.25 <
      3038    1   7   3  12   125.19   133.87    23.78 o
      3039    1   8   3  12    10.63    31.84    20.71 <
      3040    1   9   3  12     0.51    41.04    21.86 <
      3041    1  10   3  12   406.07   381.29    31.45 o
      3042    1  11   3  12   679.58   616.43    23.02 o
      3043    1  12   3  12    52.75    57.92    14.58 o
      3044    1  13   3  12   178.21   173.00    16.11 o
      3045    1  14   3  12     2.30    30.30    15.34 <
      3046    1  15   3  12   191.45   191.03    24.17 o
      3047    1 -19   4  12    19.78    -4.60    19.95 <
      3048    1 -18   4  12    89.08    98.58    23.40 o
      3049    1 -17   4  12   290.03   311.09    30.69 o
      3050    1 -16   4  12     1.76    16.11    18.41 <
      3051    1 -15   4  12    36.01    42.96    19.18 <
      3052    1 -14   4  12    50.31    38.74    18.03 <
      3053    1 -13   4  12    87.65    78.64    19.56 o
      3054    1 -12   4  12    11.10    30.69    16.49 <
      3055    1 -11   4  12   169.71   184.89    21.86 o
      3056    1 -10   4  12    48.06    45.26    16.88 <
      3057    1  -9   4  12   211.04   221.71    19.18 o
      3058    1  -8   4  12   337.40   359.80    21.86 o
      3059    1  -7   4  12    21.99    19.95    13.04 <
      3060    1  -6   4  12    84.41    76.33    18.41 o
      3061    1  -5   4  12    45.83    55.62    12.27 o
      3062    1  -4   4  12    71.97    73.65    12.27 o
      3063    1  -3   4  12   520.55   459.54    24.93 o
      3064    1  -2   4  12    67.87    72.11    17.26 o
      3065    1  -1   4  12  1805.13  1756.45    42.19 o
      3066    1   0   4  12  1539.26  1472.21    43.35 o
      3067    1   1   4  12   242.33   225.55    40.28 o
      3068    1   2   4  12   662.89   644.04    58.69 o
      3069    1   3   4  12   264.76   256.62    48.72 o
      3070    1   4   4  12    20.69    42.96    34.52 <
      3071    1   5   4  12    72.67    70.20    40.66 <
      3072    1   6   4  12   275.97   341.39    41.04 o
      3073    1   7   4  12   313.55   340.63    41.81 o
      3074    1   8   4  12   504.80   552.75    37.98 o
      3075    1   9   4  12   342.43   334.87    32.60 o
      3076    1  10   4  12   187.99   154.97    26.47 o
      3077    1  11   4  12   368.98   323.75    18.03 o
      3078    1  12   4  12     6.98    14.58    11.89 <
      3079    1  13   4  12    48.48    49.48    14.19 o
      3080    1  14   4  12   297.08   237.06    19.95 o
      3081    1 -17   5  12   279.66   292.68    47.95 o
      3082    1 -16   5  12   326.89   238.59    28.77 o
      3083    1 -15   5  12   189.24   101.65    23.78 o
      3084    1 -14   5  12   218.92   192.56    27.62 o
      3085    1 -13   5  12   199.32   175.68    26.85 o
      3086    1 -12   5  12   121.88   150.37    26.08 o
      3087    1 -11   5  12   283.18   303.42    31.45 o
      3088    1 -10   5  12   445.97   495.98    36.82 o
      3089    1  -9   5  12   325.24   324.13    32.22 o
      3090    1  -8   5  12   586.98   631.00    31.84 o
      3091    1  -7   5  12   353.25   342.16    25.32 o
      3092    1  -6   5  12   425.90   394.71    24.55 o
      3093    1  -5   5  12   676.53   614.51    27.62 o
      3094    1  -4   5  12   167.96   178.37    23.02 o
      3095    1  -3   5  12   539.24   480.64    23.78 o
      3096    1  -2   5  12   780.30   755.67    29.92 o
      3097    1  -1   5  12   528.06   474.50    23.78 o
      3098    1   0   5  12   362.58   352.52    24.17 o
      3099    1   1   5  12   144.71   143.85    19.56 o
      3100    1   2   5  12   286.62   266.98    22.63 o
      3101    1   3   5  12    67.65    66.36    18.80 o
      3102    1   4   5  12     1.63    -7.29     8.44 <
      3103    1   5   5  12    60.04    66.74    12.27 o
      3104    1   6   5  12   256.41   215.96    20.71 o
      3105    1   7   5  12   155.05   118.53    35.67 o
      3106    1   8   5  12    52.31    72.11    19.56 o
      3107    1   9   5  12   267.85   255.09    17.65 o
      3108    1  10   5  12   103.75   118.91    15.34 o
      3109    1  11   5  12    10.17    10.74    13.04 <
      3110    1 -12   6  12   120.48   118.14    27.62 o
      3111    1 -11   6  12     8.32   -28.77    21.86 <
      3112    1 -10   6  12    65.51    74.42    23.78 o
      3113    1  -9   6  12   168.64   158.42    28.39 o
      3114    1  -8   6  12   653.56   672.43    44.11 o
      3115    1  -7   6  12   513.97   542.39    39.89 o
      3116    1  -6   6  12     0.23   -22.25    11.89 <
      3117    1  -5   6  12    37.39    42.58    12.66 o
      3118    1  -4   6  12    56.66    55.24    14.96 o
      3119    1  -3   6  12    84.90    89.76    16.11 o
      3120    1  -2   6  12     0.53    18.03    12.66 <
      3121    1  -1   6  12   109.61   112.39    16.88 o
      3122    1   0   6  12   468.34   428.47    24.93 o
      3123    1   1   6  12   416.97   395.48    24.17 o
      3124    1   2   6  12   224.03   240.89    16.11 o
      3125    1   3   6  12    22.39    25.70    11.89 <
      3126    1   4   6  12    46.42    40.66    13.04 o
      3127    1   5   6  12     3.11    31.84    13.81 <
      3128    1   6   6  12     8.74    11.89    12.27 <
      3129    1   7   6  12    49.90    43.35    14.19 o
      3130    2  17  -1  13   479.57   421.18    57.15 o
      3130    1 -23   1  13   479.57   421.18    57.15 o
      3131    2  16  -1  13   547.68   573.85    58.31 o
      3131    1 -22   1  13   547.68   573.85    58.31 o
      3132    2  15  -1  13   188.95   136.94    40.66 o
      3132    1 -21   1  13   188.95   136.94    40.66 o
      3133    2  14  -1  13   193.89   173.38    47.18 o
      3133    1 -20   1  13   193.89   173.38    47.18 o
      3134    2  13  -1  13   168.71   102.42    43.73 <
      3134    1 -19   1  13   168.71   102.42    43.73 <
      3135    2  12  -1  13    17.29    22.25    34.14 <
      3135    1 -18   1  13    17.29    22.25    34.14 <
      3136    2  11  -1  13   581.04   532.80    34.91 o
      3136    1 -17   1  13   581.04   532.80    34.91 o
      3137    2  10  -1  13  2044.47  2015.37    95.51 o
      3137    1 -16   1  13  2044.47  2015.37    95.51 o
      3138    2   9  -1  13   843.93   933.27    48.33 o
      3138    1 -15   1  13   843.93   933.27    48.33 o
      3139    2   8  -1  13  1408.39  1389.36    54.09 o
      3139    1 -14   1  13  1408.39  1389.36    54.09 o
      3140    2   7  -1  13  2175.78  2089.02    50.25 o
      3140    1 -13   1  13  2175.78  2089.02    50.25 o
      3141    2   6  -1  13   309.55   273.88    25.70 o
      3141    1 -12   1  13   309.55   273.88    25.70 o
      3142    2   5  -1  13    97.59   107.79    11.12 o
      3142    1 -11   1  13    97.59   107.79    11.12 o
      3143    2   4  -1  13   206.18   263.52    14.19 o
      3143    1 -10   1  13   206.18   263.52    14.19 o
      3144    2   3  -1  13   808.46  1049.11    23.40 o
      3144    1  -9   1  13   808.46  1049.11    23.40 o
      3145    2   2  -1  13  1958.07  1983.92    23.78 o
      3145    1  -8   1  13  1958.07  1983.92    23.78 o
      3146    2   1  -1  13  1702.04  1841.61    23.02 o
      3146    1  -7   1  13  1702.04  1841.61    23.02 o
      3147    2   0  -1  13  2774.44  2861.18    29.92 o
      3147    1  -6   1  13  2774.44  2861.18    29.92 o
      3148    2  -1  -1  13  2960.30  2723.09    29.15 o
      3148    1  -5   1  13  2960.30  2723.09    29.15 o
      3149    2  -2  -1  13   231.29   265.06     9.59 o
      3149    1  -4   1  13   231.29   265.06     9.59 o
      3150    2  -3  -1  13    18.00    21.48     6.14 o
      3150    1  -3   1  13    18.00    21.48     6.14 o
      3151    2  -4  -1  13    43.55    54.47     6.90 o
      3151    1  -2   1  13    43.55    54.47     6.90 o
      3152    2  -5  -1  13   127.86   429.62    13.81 o
      3152    1  -1   1  13   127.86   429.62    13.81 o
      3153    2  -6  -1  13   583.62   858.47    19.18 o
      3153    1   0   1  13   583.62   858.47    19.18 o
      3154    2  -7  -1  13  1319.25  1479.88    31.84 o
      3154    1   1   1  13  1319.25  1479.88    31.84 o
      3155    2  -8  -1  13   887.01  1013.06    21.48 o
      3155    1   2   1  13   887.01  1013.06    21.48 o
      3156    2  -9  -1  13  2162.55  2112.03    30.69 o
      3156    1   3   1  13  2162.55  2112.03    30.69 o
      3157    2 -10  -1  13   542.97   533.57    18.41 o
      3157    1   4   1  13   542.97   533.57    18.41 o
      3158    2 -11  -1  13    59.16    79.02    11.89 o
      3158    1   5   1  13    59.16    79.02    11.89 o
      3159    2 -12  -1  13    12.34    37.59     8.44 o
      3159    1   6   1  13    12.34    37.59     8.44 o
      3160    2 -13  -1  13   261.31   432.69    11.12 o
      3160    1   7   1  13   261.31   432.69    11.12 o
      3161    2 -14  -1  13   325.89   478.33    12.27 o
      3161    1   8   1  13   325.89   478.33    12.27 o
      3162    2 -15  -1  13    60.04   121.21     7.67 o
      3162    1   9   1  13    60.04   121.21     7.67 o
      3163    2 -16  -1  13   249.04   435.37    12.66 o
      3163    1  10   1  13   249.04   435.37    12.66 o
      3164    2 -17  -1  13    99.37   141.16     8.44 o
      3164    1  11   1  13    99.37   141.16     8.44 o
      3165    2 -18  -1  13    69.54    53.70     6.90 o
      3165    1  12   1  13    69.54    53.70     6.90 o
      3166    2 -19  -1  13    33.43    47.18    11.51 o
      3166    1  13   1  13    33.43    47.18    11.51 o
      3167    2 -20  -1  13    40.77    62.52    15.73 o
      3167    1  14   1  13    40.77    62.52    15.73 o
      3168    2 -21  -1  13   190.75   205.99    21.10 o
      3168    1  15   1  13   190.75   205.99    21.10 o
      3169    2 -22  -1  13   199.08   288.46    25.32 o
      3169    1  16   1  13   199.08   288.46    25.32 o
      3170    2 -23  -1  13    31.85    30.69    21.10 <
      3170    1  17   1  13    31.85    30.69    21.10 <
      3171    2  16  -2  13    46.92    50.63    23.78 <
      3171    1 -22   2  13    46.92    50.63    23.78 <
      3172    2  15  -2  13    45.90    26.85    28.00 <
      3172    1 -21   2  13    45.90    26.85    28.00 <
      3173    2  14  -2  13   440.29   440.74    45.26 o
      3173    1 -20   2  13   440.29   440.74    45.26 o
      3174    2  13  -2  13   120.64    90.53    28.77 o
      3174    1 -19   2  13   120.64    90.53    28.77 o
      3175    2  12  -2  13   114.73   110.09    21.48 o
      3175    1 -18   2  13   114.73   110.09    21.48 o
      3176    2  11  -2  13   100.38   140.39    18.03 o
      3176    1 -17   2  13   100.38   140.39    18.03 o
      3177    2  10  -2  13    11.52    11.12    12.27 <
      3177    1 -16   2  13    11.52    11.12    12.27 <
      3178    2   9  -2  13     0.92    -1.92    11.51 <
      3178    1 -15   2  13     0.92    -1.92    11.51 <
      3179    2   8  -2  13    60.30    96.66    15.73 o
      3179    1 -14   2  13    60.30    96.66    15.73 o
      3180    2   7  -2  13   341.79   329.50    21.48 o
      3180    1 -13   2  13   341.79   329.50    21.48 o
      3181    2   6  -2  13  1808.06  1705.05    40.28 o
      3181    1 -12   2  13  1808.06  1705.05    40.28 o
      3182    2   5  -2  13   722.51   818.19    23.02 o
      3182    1 -11   2  13   722.51   818.19    23.02 o
      3183    2   4  -2  13     5.85    18.03     9.21 <
      3183    1 -10   2  13     5.85    18.03     9.21 <
      3184    2   3  -2  13   120.29   152.67    12.66 o
      3184    1  -9   2  13   120.29   152.67    12.66 o
      3185    2   2  -2  13   100.66   119.30    10.36 o
      3185    1  -8   2  13   100.66   119.30    10.36 o
      3186    2   1  -2  13    95.94   113.54     9.59 o
      3186    1  -7   2  13    95.94   113.54     9.59 o
      3187    2   0  -2  13   225.78   217.88    12.27 o
      3187    1  -6   2  13   225.78   217.88    12.27 o
      3188    2  -1  -2  13   183.81   202.92    11.89 o
      3188    1  -5   2  13   183.81   202.92    11.89 o
      3189    2  -2  -2  13  1351.38  1329.52    21.10 o
      3189    1  -4   2  13  1351.38  1329.52    21.10 o
      3190    2  -3  -2  13  2435.66  2598.04    35.29 o
      3190    1  -3   2  13  2435.66  2598.04    35.29 o
      3191    2  -4  -2  13   299.12   414.27    14.96 o
      3191    1  -2   2  13   299.12   414.27    14.96 o
      3192    2  -5  -2  13   201.70   224.78    18.80 o
      3192    1  -1   2  13   201.70   224.78    18.80 o
      3193    2  -6  -2  13    29.54    57.54    14.96 o
      3193    1   0   2  13    29.54    57.54    14.96 o
      3194    2  -7  -2  13   265.69   280.79    23.78 o
      3194    1   1   2  13   265.69   280.79    23.78 o
      3195    2  -8  -2  13    98.54   106.25    18.80 o
      3195    1   2   2  13    98.54   106.25    18.80 o
      3196    2  -9  -2  13   101.55   130.42    13.81 o
      3196    1   3   2  13   101.55   130.42    13.81 o
      3197    2 -10  -2  13    93.84    81.32    13.04 o
      3197    1   4   2  13    93.84    81.32    13.04 o
      3198    2 -11  -2  13  2123.88  1987.75    38.36 o
      3198    1   5   2  13  2123.88  1987.75    38.36 o
      3199    2 -12  -2  13   563.76   695.83    26.85 o
      3199    1   6   2  13   563.76   695.83    26.85 o
      3200    2 -13  -2  13    53.10    85.92    11.51 o
      3200    1   7   2  13    53.10    85.92    11.51 o
      3201    2 -14  -2  13   311.70   283.09    16.49 o
      3201    1   8   2  13   311.70   283.09    16.49 o
      3202    2 -15  -2  13    17.11     2.30     8.44 <
      3202    1   9   2  13    17.11     2.30     8.44 <
      3203    2 -16  -2  13     8.93     9.97     9.97 <
      3203    1  10   2  13     8.93     9.97     9.97 <
      3204    2 -17  -2  13   136.99   147.68    13.04 o
      3204    1  11   2  13   136.99   147.68    13.04 o
      3205    2 -18  -2  13    72.20    86.31    11.51 o
      3205    1  12   2  13    72.20    86.31    11.51 o
      3206    2 -19  -2  13   123.56   140.78    13.04 o
      3206    1  13   2  13   123.56   140.78    13.04 o
      3207    2 -20  -2  13   359.37   389.34    20.71 o
      3207    1  14   2  13   359.37   389.34    20.71 o
      3208    2 -21  -2  13    82.87    73.27    13.43 o
      3208    1  15   2  13    82.87    73.27    13.43 o
      3209    2 -22  -2  13     3.45    24.17    12.27 <
      3209    1  16   2  13     3.45    24.17    12.27 <
      3210    2  15  -3  13   184.13   140.39    30.69 o
      3210    1 -21   3  13   184.13   140.39    30.69 o
      3211    2  14  -3  13   217.10   240.13    34.52 o
      3211    1 -20   3  13   217.10   240.13    34.52 o
      3212    2  13  -3  13   600.12   578.83    35.29 o
      3212    1 -19   3  13   600.12   578.83    35.29 o
      3213    2  12  -3  13   512.79   476.80    31.84 o
      3213    1 -18   3  13   512.79   476.80    31.84 o
      3214    2  11  -3  13    90.67    90.53    19.56 o
      3214    1 -17   3  13    90.67    90.53    19.56 o
      3215    2  10  -3  13   170.03   165.33    18.41 o
      3215    1 -16   3  13   170.03   165.33    18.41 o
      3216    2   9  -3  13   525.51   425.02    22.25 o
      3216    1 -15   3  13   525.51   425.02    22.25 o
      3217    2   8  -3  13   129.81   112.39    16.49 o
      3217    1 -14   3  13   129.81   112.39    16.49 o
      3218    2   7  -3  13   142.15   147.30    16.49 o
      3218    1 -13   3  13   142.15   147.30    16.49 o
      3219    2   6  -3  13   898.69   911.79    43.35 o
      3219    1 -12   3  13   898.69   911.79    43.35 o
      3220    2   5  -3  13   716.68   702.73    40.28 o
      3220    1 -11   3  13   716.68   702.73    40.28 o
      3221    2   4  -3  13   817.70   757.59    31.07 o
      3221    1 -10   3  13   817.70   757.59    31.07 o
      3222    2   3  -3  13   687.74   609.52    28.00 o
      3222    1  -9   3  13   687.74   609.52    28.00 o
      3223    2   2  -3  13   353.84   392.03    24.93 o
      3223    1  -8   3  13   353.84   392.03    24.93 o
      3224    2   1  -3  13   389.64   406.22    20.33 o
      3224    1  -7   3  13   389.64   406.22    20.33 o
      3225    2   0  -3  13    78.36    79.40    12.66 o
      3225    1  -6   3  13    78.36    79.40    12.66 o
      3226    2  -1  -3  13   395.66   552.75    21.10 o
      3226    1  -5   3  13   395.66   552.75    21.10 o
      3227    2  -2  -3  13   710.27   820.11    28.77 o
      3227    1  -4   3  13   710.27   820.11    28.77 o
      3228    2  -3  -3  13   108.98   110.47    14.96 o
      3228    1  -3   3  13   108.98   110.47    14.96 o
      3229    2  -4  -3  13  1085.94  1151.91    34.14 o
      3229    1  -2   3  13  1085.94  1151.91    34.14 o
      3230    2  -5  -3  13  1791.87  1737.65    73.65 o
      3230    1  -1   3  13  1791.87  1737.65    73.65 o
      3231    2  -6  -3  13     5.48     3.45    25.70 <
      3231    1   0   3  13     5.48     3.45    25.70 <
      3232    2  -7  -3  13    29.70    61.37    29.15 <
      3232    1   1   3  13    29.70    61.37    29.15 <
      3233    2  -8  -3  13   413.74   411.21    52.17 o
      3233    1   2   3  13   413.74   411.21    52.17 o
      3234    2  -9  -3  13    84.42   155.74    34.91 o
      3234    1   3   3  13    84.42   155.74    34.91 o
      3235    2 -10  -3  13    73.94   150.37    33.37 o
      3235    1   4   3  13    73.94   150.37    33.37 o
      3236    2 -11  -3  13    38.58    96.66    24.93 o
      3236    1   5   3  13    38.58    96.66    24.93 o
      3237    2 -12  -3  13   123.60   179.52    28.00 o
      3237    1   6   3  13   123.60   179.52    28.00 o
      3238    2 -13  -3  13   217.07   287.69    30.30 o
      3238    1   7   3  13   217.07   287.69    30.30 o
      3239    2 -14  -3  13    12.79    33.76    21.10 <
      3239    1   8   3  13    12.79    33.76    21.10 <
      3240    2 -15  -3  13    28.39    72.88    23.40 o
      3240    1   9   3  13    28.39    72.88    23.40 o
      3241    2 -16  -3  13    78.80   123.51    24.93 o
      3241    1  10   3  13    78.80   123.51    24.93 o
      3242    2 -17  -3  13    57.96    40.66    16.49 <
      3242    1  11   3  13    57.96    40.66    16.49 <
      3243    2 -18  -3  13    53.73    77.10    14.96 o
      3243    1  12   3  13    53.73    77.10    14.96 o
      3244    2 -19  -3  13    26.61    77.10    16.49 o
      3244    1  13   3  13    26.61    77.10    16.49 o
      3245    2 -20  -3  13     9.41    41.04    14.96 <
      3245    1  14   3  13     9.41    41.04    14.96 <
      3246    2 -21  -3  13     9.34    42.19    19.18 <
      3246    1  15   3  13     9.34    42.19    19.18 <
      3247    2  13  -4  13    82.45   114.31    27.23 o
      3247    1 -19   4  13    82.45   114.31    27.23 o
      3248    2  12  -4  13    15.58    26.85    21.48 <
      3248    1 -18   4  13    15.58    26.85    21.48 <
      3249    2  11  -4  13    20.90    34.14    20.33 <
      3249    1 -17   4  13    20.90    34.14    20.33 <
      3250    2  10  -4  13     9.66    -7.67    17.26 <
      3250    1 -16   4  13     9.66    -7.67    17.26 <
      3251    2   9  -4  13    73.46    73.27    20.71 o
      3251    1 -15   4  13    73.46    73.27    20.71 o
      3252    2   8  -4  13   309.44   359.04    30.30 o
      3252    1 -14   4  13   309.44   359.04    30.30 o
      3253    2   7  -4  13   786.84   763.72    37.98 o
      3253    1 -13   4  13   786.84   763.72    37.98 o
      3254    2   6  -4  13   801.43   755.67    37.98 o
      3254    1 -12   4  13   801.43   755.67    37.98 o
      3255    2   5  -4  13   362.14   423.10    29.92 o
      3255    1 -11   4  13   362.14   423.10    29.92 o
      3256    2   4  -4  13   349.61   492.91    26.08 o
      3256    1 -10   4  13   349.61   492.91    26.08 o
      3257    2   3  -4  13    41.01   132.34    18.03 o
      3257    1  -9   4  13    41.01   132.34    18.03 o
      3258    2   2  -4  13    25.09    37.98    13.81 <
      3258    1  -8   4  13    25.09    37.98    13.81 <
      3259    2   1  -4  13    42.34    57.54    19.56 <
      3259    1  -7   4  13    42.34    57.54    19.56 <
      3260    2   0  -4  13   118.42   125.43    25.70 o
      3260    1  -6   4  13   118.42   125.43    25.70 o
      3261    2  -1  -4  13   919.66   992.72    43.73 o
      3261    1  -5   4  13   919.66   992.72    43.73 o
      3262    2  -2  -4  13  2212.81  2117.02    46.41 o
      3262    1  -4   4  13  2212.81  2117.02    46.41 o
      3263    2  -3  -4  13  1074.12  1107.03    37.59 o
      3263    1  -3   4  13  1074.12  1107.03    37.59 o
      3264    2  -4  -4  13   721.05   905.65    33.37 o
      3264    1  -2   4  13   721.05   905.65    33.37 o
      3265    2  -5  -4  13   747.41   770.63    32.99 o
      3265    1  -1   4  13   747.41   770.63    32.99 o
      3266    2  -6  -4  13   165.09   154.97    17.65 o
      3266    1   0   4  13   165.09   154.97    17.65 o
      3267    2  -7  -4  13     3.96    -9.59    29.54 <
      3267    1   1   4  13     3.96    -9.59    29.54 <
      3268    2  -8  -4  13    39.36   169.55    80.17 <
      3268    1   2   4  13    39.36   169.55    80.17 <
      3269    2  -9  -4  13   889.48   895.29    74.42 o
      3269    1   3   4  13   889.48   895.29    74.42 o
      3270    2 -10  -4  13  1143.51  1049.11    75.18 o
      3270    1   4   4  13  1143.51  1049.11    75.18 o
      3271    2 -11  -4  13   543.86   478.33    60.99 o
      3271    1   5   4  13   543.86   478.33    60.99 o
      3272    2 -12  -4  13   659.92   623.71    52.17 o
      3272    1   6   4  13   659.92   623.71    52.17 o
      3273    2 -13  -4  13   562.03   589.96    52.94 o
      3273    1   7   4  13   562.03   589.96    52.94 o
      3274    2 -14  -4  13   127.52   167.63    26.47 o
      3274    1   8   4  13   127.52   167.63    26.47 o
      3275    2 -15  -4  13    30.41    40.66    23.02 <
      3275    1   9   4  13    30.41    40.66    23.02 <
      3276    2 -16  -4  13     2.40     5.75    22.63 <
      3276    1  10   4  13     2.40     5.75    22.63 <
      3277    2 -17  -4  13   213.89   204.07    21.86 o
      3277    1  11   4  13   213.89   204.07    21.86 o
      3278    2 -18  -4  13   108.15    64.44    14.19 o
      3278    1  12   4  13   108.15    64.44    14.19 o
      3279    2 -19  -4  13   225.54   200.62    18.80 o
      3279    1  13   4  13   225.54   200.62    18.80 o
      3280    2  10  -5  13    75.73    95.51    24.93 o
      3280    1 -16   5  13    75.73    95.51    24.93 o
      3281    2   9  -5  13    50.32    69.81    23.02 o
      3281    1 -15   5  13    50.32    69.81    23.02 o
      3282    2   8  -5  13    14.14    39.51    23.02 <
      3282    1 -14   5  13    14.14    39.51    23.02 <
      3283    2   7  -5  13    54.39    92.44    25.32 o
      3283    1 -13   5  13    54.39    92.44    25.32 o
      3284    2   6  -5  13   344.36   333.72    32.22 o
      3284    1 -12   5  13   344.36   333.72    32.22 o
      3285    2   5  -5  13   285.32   291.91    30.30 o
      3285    1 -11   5  13   285.32   291.91    30.30 o
      3286    2   4  -5  13   416.67   402.77    35.29 o
      3286    1 -10   5  13   416.67   402.77    35.29 o
      3287    2   3  -5  13   432.09   379.37    34.14 o
      3287    1  -9   5  13   432.09   379.37    34.14 o
      3288    2   2  -5  13   315.36   268.51    24.17 o
      3288    1  -8   5  13   315.36   268.51    24.17 o
      3289    2   1  -5  13    13.01    14.58    17.65 <
      3289    1  -7   5  13    13.01    14.58    17.65 <
      3290    2   0  -5  13    76.45    84.77    25.32 o
      3290    1  -6   5  13    76.45    84.77    25.32 o
      3291    2  -1  -5  13    44.56    83.24    21.48 o
      3291    1  -5   5  13    44.56    83.24    21.48 o
      3292    2  -2  -5  13   131.80   161.87    23.78 o
      3292    1  -4   5  13   131.80   161.87    23.78 o
      3293    2  -3  -5  13    55.46    62.14    15.34 o
      3293    1  -3   5  13    55.46    62.14    15.34 o
      3294    2  -4  -5  13   302.94   317.99    23.02 o
      3294    1  -2   5  13   302.94   317.99    23.02 o
      3295    2  -5  -5  13   412.09   381.29    23.02 o
      3295    1  -1   5  13   412.09   381.29    23.02 o
      3296    2  -6  -5  13    80.35    97.43    18.80 o
      3296    1   0   5  13    80.35    97.43    18.80 o
      3297    2  -7  -5  13     3.66    10.36    16.88 <
      3297    1   1   5  13     3.66    10.36    16.88 <
      3298    2  -8  -5  13    11.75    47.56    19.18 <
      3298    1   2   5  13    11.75    47.56    19.18 <
      3299    2  -9  -5  13    97.49   131.19    20.71 o
      3299    1   3   5  13    97.49   131.19    20.71 o
      3300    2 -10  -5  13    15.50    51.40    10.36 o
      3300    1   4   5  13    15.50    51.40    10.36 o
      3301    2 -11  -5  13   265.42   318.76    44.50 o
      3301    1   5   5  13   265.42   318.76    44.50 o
      3302    2 -12  -5  13    55.61    75.57    34.91 <
      3302    1   6   5  13    55.61    75.57    34.91 <
      3303    2 -13  -5  13    98.98   140.01    38.74 o
      3303    1   7   5  13    98.98   140.01    38.74 o
      3304    2 -14  -5  13   175.93   209.82    44.50 o
      3304    1   8   5  13   175.93   209.82    44.50 o
      3305    2 -15  -5  13     1.87   -18.41    16.88 <
      3305    1   9   5  13     1.87   -18.41    16.88 <
      3306    2 -16  -5  13    39.63    54.09    14.58 o
      3306    1  10   5  13    39.63    54.09    14.58 o
      3307    2   6  -6  13    34.30    52.17    26.47 <
      3307    1 -12   6  13    34.30    52.17    26.47 <
      3308    2   5  -6  13   222.22   199.85    30.30 o
      3308    1 -11   6  13   222.22   199.85    30.30 o
      3309    2   4  -6  13   353.89   418.88    39.89 o
      3309    1 -10   6  13   353.89   418.88    39.89 o
      3310    2   3  -6  13   302.89   319.91    34.52 o
      3310    1  -9   6  13   302.89   319.91    34.52 o
      3311    2   2  -6  13  1024.13   966.26    48.33 o
      3311    1  -8   6  13  1024.13   966.26    48.33 o
      3312    2   1  -6  13   787.72   810.91    44.50 o
      3312    1  -7   6  13   787.72   810.91    44.50 o
      3313    2   0  -6  13   137.54   193.71    23.40 o
      3313    1  -6   6  13   137.54   193.71    23.40 o
      3314    2  -1  -6  13   137.79   154.20    18.80 o
      3314    1  -5   6  13   137.79   154.20    18.80 o
      3315    2  -2  -6  13   185.60   181.05    19.18 o
      3315    1  -4   6  13   185.60   181.05    19.18 o
      3316    2  -3  -6  13   108.25   102.80    17.26 o
      3316    1  -3   6  13   108.25   102.80    17.26 o
      3317    2  -4  -6  13   190.01   219.41    20.33 o
      3317    1  -2   6  13   190.01   219.41    20.33 o
      3318    2  -5  -6  13   606.14   593.79    28.39 o
      3318    1  -1   6  13   606.14   593.79    28.39 o
      3319    2  -6  -6  13   713.46   640.97    28.39 o
      3319    1   0   6  13   713.46   640.97    28.39 o
      3320    2  -7  -6  13   690.24   722.30    29.54 o
      3320    1   1   6  13   690.24   722.30    29.54 o
      3321    2  -8  -6  13   461.92   520.15    21.10 o
      3321    1   2   6  13   461.92   520.15    21.10 o
      3322    2  -9  -6  13   172.57   156.50    15.73 o
      3322    1   3   6  13   172.57   156.50    15.73 o
      3323    2 -10  -6  13   199.17   227.08    17.65 o
      3323    1   4   6  13   199.17   227.08    17.65 o
      3324    2 -11  -6  13    37.73    75.18    14.96 o
      3324    1   5   6  13    37.73    75.18    14.96 o
      3325    2 -12  -6  13   127.90   104.34    16.11 o
      3325    1   6   6  13   127.90   104.34    16.11 o
      3326    1 -23   0  14   159.66   -41.43    52.55 <
      3327    1 -22   0  14   344.21   420.41    73.65 o
      3328    1 -21   0  14  1218.74  1044.89    97.05 o
      3329    1 -20   0  14  1227.22  1261.24   104.34 o
      3330    1 -19   0  14   955.86   916.39    87.07 o
      3331    1 -18   0  14   389.02   282.70    57.92 o
      3332    1 -16   0  14   477.50   469.89    52.55 o
      3333    1 -15   0  14   237.23   240.13    39.89 o
      3334    1 -14   0  14   270.85   324.52    44.11 o
      3335    1 -13   0  14  4536.00  4501.02   138.86 o
      3336    1 -12   0  14  1540.91  1528.60    71.73 o
      3337    1 -11   0  14  4254.97  3827.44   119.68 o
      3338    1 -10   0  14  2030.94  1866.92    45.65 o
      3339    1  -9   0  14   217.41   194.86    15.34 o
      3340    1  -8   0  14  1248.84  1229.40    30.30 o
      3341    1  -7   0  14  1324.21  1287.70    26.47 o
      3342    1  -6   0  14  2299.90  2463.02    40.28 o
      3343    1  -5   0  14  7447.07  7552.08    92.06 o
      3344    1  -4   0  14 12097.50 12499.60   141.16 o
      3345    1  -3   0  14 13853.90 14926.90   165.71 o
      3346    1  -2   0  14  7796.34  7949.86    95.90 o
      3347    1  -1   0  14  1793.59  1751.08    32.60 o
      3348    1   0   0  14    10.76    18.41     9.59 <
      3349    1   1   0  14  1178.44  1061.00    24.93 o
      3350    1   2   0  14     8.02     4.99    11.51 <
      3351    1   3   0  14    36.11    21.48    12.66 <
      3352    1   4   0  14  4830.16  4751.89    70.96 o
      3353    1   5   0  14  2124.82  2011.53    42.58 o
      3354    1   6   0  14  1261.95  1273.51    36.44 o
      3355    1   7   0  14  2655.38  2563.52    42.19 o
      3356    1   8   0  14   534.58   562.34    18.80 o
      3357    1   9   0  14   148.39   136.56    11.51 o
      3358    1  10   0  14   492.42   428.08    23.78 o
      3359    1  11   0  14   780.34   855.40    34.91 o
      3360    1  12   0  14   797.90   778.30    34.91 o
      3361    1  13   0  14   928.60   934.80    38.36 o
      3362    1  14   0  14   952.84   936.34    40.66 o
      3363    1  15   0  14   653.22   665.14    36.82 o
      3364    1  16   0  14     6.14   -36.06    30.30 <
      3365    1 -22   1  14    16.95   -83.62    25.32 <
      3366    1 -21   1  14    82.75    32.22    29.54 <
      3367    1 -20   1  14   202.84   185.66    34.91 o
      3368    1 -19   1  14   126.79   144.61    31.84 o
      3369    1 -18   1  14     6.06    14.96    22.63 <
      3370    1 -17   1  14     8.30     7.67    20.71 <
      3371    1 -16   1  14   197.13   212.89    24.55 o
      3372    1 -15   1  14     0.59    -6.14    14.19 <
      3373    1 -14   1  14   204.49   171.85    20.33 o
      3374    1 -13   1  14   129.38   130.80    18.41 o
      3375    1 -12   1  14   148.06   149.60    22.25 o
      3376    1 -11   1  14   126.67   115.08    13.43 o
      3377    1 -10   1  14   702.01   722.68    24.17 o
      3378    1  -9   1  14     1.24     5.37    10.36 <
      3379    1  -8   1  14   232.00   245.11    12.27 o
      3380    1  -7   1  14   936.74   858.09    17.65 o
      3381    1  -6   1  14    50.90    68.28     8.82 o
      3382    1  -5   1  14   152.43   150.75     9.97 o
      3383    1  -4   1  14   162.17   176.45     9.97 o
      3384    1  -3   1  14    30.51    26.08     6.90 o
      3385    1  -2   1  14  1283.79  1276.96    21.86 o
      3386    1  -1   1  14   679.56   627.55    16.49 o
      3387    1   0   1  14   189.19   158.80    10.74 o
      3388    1   1   1  14   995.97   944.01    19.95 o
      3389    1   2   1  14   114.90   107.40    10.36 o
      3390    1   3   1  14    21.17    23.40     8.82 <
      3391    1   4   1  14   284.33   247.41    11.89 o
      3392    1   5   1  14   366.87   334.11    13.81 o
      3393    1   6   1  14     5.33    14.96     8.06 <
      3394    1   7   1  14   282.02   252.02     9.21 o
      3395    1   8   1  14    36.09    36.82     6.14 o
      3396    1   9   1  14     2.86    -0.77     5.37 <
      3397    1  10   1  14    18.02    19.56     5.75 o
      3398    1  11   1  14     6.61    -2.30     6.52 <
      3399    1  12   1  14    49.30    59.84     9.59 o
      3400    1  13   1  14     3.81    10.36    13.04 <
      3401    1  14   1  14    30.47    39.51    15.34 <
      3402    1  15   1  14   203.19   228.62    26.08 o
      3403    1  16   1  14    56.75    56.00    20.33 <
      3404    1 -22   2  14   243.57   143.46    36.82 o
      3405    1 -21   2  14   137.69   119.30    33.76 o
      3406    1 -20   2  14    63.65    56.39    29.92 <
      3407    1 -19   2  14   444.12   410.05    43.73 o
      3408    1 -18   2  14   339.08   325.67    29.54 o
      3409    1 -17   2  14   614.09   600.32    36.06 o
      3410    1 -16   2  14   173.31   143.85    21.10 o
      3411    1 -15   2  14   409.11   367.48    31.07 o
      3412    1 -14   2  14  1271.45  1131.58    42.19 o
      3413    1 -13   2  14   446.74   451.10    33.37 o
      3414    1 -12   2  14  1674.44  1477.58    46.41 o
      3415    1 -11   2  14  2110.52  1930.98    39.51 o
      3416    1 -10   2  14  3240.24  3068.32    50.63 o
      3417    1  -9   2  14  2908.52  2746.87    46.41 o
      3418    1  -8   2  14  1621.47  1445.36    28.00 o
      3419    1  -7   2  14  2713.60  2563.13    34.52 o
      3420    1  -6   2  14   126.81   119.30    12.27 o
      3421    1  -5   2  14   232.83   231.69    18.41 o
      3422    1  -4   2  14   921.44   888.39    23.78 o
      3423    1  -3   2  14    90.54    90.91    11.12 o
      3424    1  -2   2  14  1239.16  1227.86    24.55 o
      3425    1  -1   2  14  2495.67  2286.18    48.33 o
      3426    1   0   2  14  3916.80  3601.12    64.44 o
      3427    1   1   2  14  3602.26  3407.79    64.83 o
      3428    1   2   2  14  1996.17  1798.26    48.33 o
      3429    1   3   2  14  3317.04  2996.20    56.00 o
      3430    1   4   2  14  2680.62  2605.71    50.63 o
      3431    1   5   2  14  1014.96   981.60    35.29 o
      3432    1   6   2  14   655.10   586.51    29.54 o
      3433    1   7   2  14  1430.84  1381.68    32.99 o
      3434    1   8   2  14   650.09   578.83    29.92 o
      3435    1   9   2  14    57.19    63.29    11.51 o
      3436    1  10   2  14   193.97   179.52    13.81 o
      3437    1  11   2  14   166.13   163.41    13.43 o
      3438    1  12   2  14    65.93    78.25    11.12 o
      3439    1  13   2  14    69.49    75.95    11.51 o
      3440    1  14   2  14   204.81   220.95    17.26 o
      3441    1  15   2  14   213.84   210.21    16.49 o
      3442    1 -21   3  14    28.13    -9.97    25.32 <
      3443    1 -20   3  14    37.56    54.09    26.85 <
      3444    1 -19   3  14   114.26    90.91    21.86 o
      3445    1 -18   3  14    80.34    60.99    20.33 <
      3446    1 -17   3  14     0.19    -8.44    16.11 <
      3447    1 -16   3  14   602.28   559.66    34.14 o
      3448    1 -15   3  14   786.63   808.22    38.36 o
      3449    1 -14   3  14  1254.31  1131.20    39.51 o
      3450    1 -13   3  14   500.41   470.28    30.30 o
      3451    1 -12   3  14    22.45    26.47    18.80 <
      3452    1 -11   3  14   302.80   293.83    23.02 o
      3453    1 -10   3  14  1197.97  1145.01    44.11 o
      3454    1  -9   3  14   744.06   729.97    41.04 o
      3455    1  -8   3  14   116.55   143.85    22.63 o
      3456    1  -7   3  14   374.16   349.07    20.33 o
      3457    1  -6   3  14   761.89   759.89    28.77 o
      3458    1  -5   3  14   392.05   325.28    19.56 o
      3459    1  -4   3  14   694.62   652.87    26.85 o
      3460    1  -3   3  14   224.06   222.87    18.03 o
      3461    1  -2   3  14   888.42   911.79    39.13 o
      3462    1  -1   3  14    23.85    60.61    59.84 <
      3463    1   0   3  14   105.88    54.09    60.61 <
      3464    1   1   3  14    86.25    74.80    33.37 <
      3465    1   2   3  14  1099.90  1013.06    67.89 o
      3466    1   3   3  14  1003.57  1046.04    62.14 o
      3467    1   4   3  14   184.94   106.64    31.84 o
      3468    1   5   3  14   257.99   264.68    39.89 o
      3469    1   6   3  14   746.98   731.12    43.35 o
      3470    1   7   3  14   960.33   893.76    42.19 o
      3471    1   8   3  14  1502.00  1430.78    50.63 o
      3472    1   9   3  14   511.97   489.84    46.80 o
      3473    1  10   3  14    61.41    42.96    30.30 <
      3474    1  11   3  14   114.37   102.80    16.88 o
      3475    1  12   3  14   108.82   128.12    18.03 o
      3476    1  13   3  14   163.03   173.38    19.18 o
      3477    1  14   3  14     4.98    15.34    14.19 <
      3478    1 -19   4  14    17.86    15.34    21.48 <
      3479    1 -18   4  14   373.22   279.25    31.07 o
      3480    1 -17   4  14   394.58   379.75    32.60 o
      3481    1 -16   4  14   251.34   255.09    28.00 o
      3482    1 -15   4  14   703.30   626.78    38.74 o
      3483    1 -14   4  14   374.83   341.78    29.54 o
      3484    1 -13   4  14    60.44    50.25    19.56 <
      3485    1 -12   4  14    42.49    56.77    19.56 <
      3486    1 -11   4  14   102.83   131.95    23.02 o
      3487    1 -10   4  14    69.58    89.76    17.26 o
      3488    1  -9   4  14   285.38   294.21    26.08 o
      3489    1  -8   4  14   950.54   926.36    52.55 o
      3490    1  -7   4  14  1295.84  1289.62    58.69 o
      3491    1  -6   4  14  1714.46  1645.21    69.81 o
      3492    1  -5   4  14  1062.96   965.49    41.43 o
      3493    1  -4   4  14  1415.71  1337.19    49.87 o
      3494    1  -3   4  14  1277.93  1170.71    39.89 o
      3495    1  -2   4  14   158.90   179.90    19.95 o
      3496    1  -1   4  14   868.80   764.87    32.99 o
      3497    1   0   4  14  1110.46  1097.83    41.43 o
      3498    1   1   4  14    91.33    47.18    35.29 <
      3499    1   2   4  14   485.26   345.61    52.94 o
      3500    1   3   4  14   508.00   505.57    58.69 o
      3501    1   4   4  14    18.75   -16.11    36.82 <
      3502    1   5   4  14    73.91   257.39   101.65 <
      3503    1   6   4  14   157.18   145.00    32.60 o
      3504    1   7   4  14   199.69   126.20    35.29 o
      3505    1   8   4  14   440.52   488.31    52.17 o
      3506    1   9   4  14   461.04   478.72    39.51 o
      3507    1  10   4  14   735.63   738.79    49.48 o
      3508    1  11   4  14   530.41   497.90    44.11 o
      3509    1  12   4  14   134.74    95.90    16.11 o
      3510    1 -16   5  14    14.47    43.35    24.93 <
      3511    1 -15   5  14     3.42    16.49    23.02 <
      3512    1 -14   5  14     4.99    24.93    23.78 <
      3513    1 -13   5  14     0.49   -19.18    19.18 <
      3514    1 -12   5  14    41.72    28.39    21.86 <
      3515    1 -11   5  14   164.32   211.36    30.69 o
      3516    1 -10   5  14    27.72    59.84    25.70 <
      3517    1  -9   5  14    70.87   141.16    28.39 o
      3518    1  -8   5  14   298.07   302.27    30.69 o
      3519    1  -7   5  14     5.49    20.33    24.17 <
      3520    1  -6   5  14     4.35    18.03    24.17 <
      3521    1  -5   5  14   179.27   156.12    26.85 o
      3522    1  -4   5  14     5.34   -25.70    18.80 <
      3523    1  -3   5  14    41.50    62.14    16.88 o
      3524    1  -2   5  14     0.08    -3.07    15.34 <
      3525    1  -1   5  14    57.14    35.67    16.49 <
      3526    1   0   5  14   109.36   119.30    20.33 o
      3527    1   1   5  14   187.50   186.81    21.10 o
      3528    1   2   5  14    92.56    94.36    21.48 o
      3529    1   3   5  14    15.57   -23.40    23.40 <
      3530    1   4   5  14    35.01    22.63    32.60 <
      3531    1   5   5  14    21.62    11.51    33.76 <
      3532    1   6   5  14   202.49   159.57    42.58 o
      3533    1   7   5  14     4.71    40.66    35.67 <
      3534    1   8   5  14    35.83     1.92    36.82 <
      3535    1   9   5  14     2.16     1.92    36.82 <
      3536    1 -11   6  14    17.98    16.11    24.17 <
      3537    1 -10   6  14   133.71    99.73    26.47 o
      3538    1  -9   6  14   347.29   350.98    36.06 o
      3539    1  -8   6  14   626.90   780.22    67.13 o
      3540    1  -7   6  14   572.49   683.94    68.28 o
      3541    1  -6   6  14   129.98   179.52    24.17 o
      3542    1  -5   6  14     6.11    12.66    16.49 <
      3543    1  -4   6  14    54.31    47.56    16.49 <
      3544    1  -3   6  14    33.25    21.10    16.11 <
      3545    1  -2   6  14     1.09    -3.07    13.81 <
      3546    1  -1   6  14   137.32   119.68    18.41 o
      3547    1   0   6  14   457.49   462.61    40.66 o
      3548    1   1   6  14   770.52   678.95    44.50 o
      3549    1   2   6  14   698.34   663.22    35.67 o
      3550    1   3   6  14   171.76   160.34    16.88 o
      3551    1   4   6  14    24.98     3.07    12.66 <
      3552    1   5   6  14     7.81   -12.27    12.66 <
      3553    2  15  -1  15   300.82   250.48    35.67 o
      3553    1 -22   1  15   300.82   250.48    35.67 o
      3554    2  14  -1  15    65.26    45.65    28.00 <
      3554    1 -21   1  15    65.26    45.65    28.00 <
      3555    2  13  -1  15    13.35   -45.26    22.25 <
      3555    1 -20   1  15    13.35   -45.26    22.25 <
      3556    2  12  -1  15    62.31    35.29    27.23 <
      3556    1 -19   1  15    62.31    35.29    27.23 <
      3557    2  11  -1  15   179.44   148.07    31.45 o
      3557    1 -18   1  15   179.44   148.07    31.45 o
      3558    2  10  -1  15     9.66     2.69    21.86 <
      3558    1 -17   1  15     9.66     2.69    21.86 <
      3559    2   9  -1  15    66.36   103.57    20.71 o
      3559    1 -16   1  15    66.36   103.57    20.71 o
      3560    2   8  -1  15   203.72   316.46    25.32 o
      3560    1 -15   1  15   203.72   316.46    25.32 o
      3561    2   7  -1  15   895.74   987.35    36.82 o
      3561    1 -14   1  15   895.74   987.35    36.82 o
      3562    2   6  -1  15     9.10     5.37    13.81 <
      3562    1 -13   1  15     9.10     5.37    13.81 <
      3563    2   5  -1  15    23.44    40.66    14.58 <
      3563    1 -12   1  15    23.44    40.66    14.58 <
      3564    2   4  -1  15     1.57     3.84    10.74 <
      3564    1 -11   1  15     1.57     3.84    10.74 <
      3565    2   3  -1  15  2011.50  1769.11    35.67 o
      3565    1 -10   1  15  2011.50  1769.11    35.67 o
      3566    2   2  -1  15  1808.48  1877.66    33.76 o
      3566    1  -9   1  15  1808.48  1877.66    33.76 o
      3567    2   1  -1  15    80.03   144.61    37.21 o
      3567    1  -8   1  15    80.03   144.61    37.21 o
      3568    2   0  -1  15    58.58    94.36    10.36 o
      3568    1  -7   1  15    58.58    94.36    10.36 o
      3569    2  -2  -1  15   744.91   823.18    19.18 o
      3569    1  -5   1  15   744.91   823.18    19.18 o
      3570    2  -3  -1  15    80.14    80.55     8.44 o
      3570    1  -4   1  15    80.14    80.55     8.44 o
      3571    2  -4  -1  15   184.73   184.12    11.51 o
      3571    1  -3   1  15   184.73   184.12    11.51 o
      3572    2  -5  -1  15  1758.37  1741.87    26.85 o
      3572    1  -2   1  15  1758.37  1741.87    26.85 o
      3573    2  -6  -1  15  3515.22  3456.51    39.89 o
      3573    1  -1   1  15  3515.22  3456.51    39.89 o
      3574    2  -7  -1  15   671.55   647.88    18.41 o
      3574    1   0   1  15   671.55   647.88    18.41 o
      3575    2  -8  -1  15  1933.80  1776.78    28.77 o
      3575    1   1   1  15  1933.80  1776.78    28.77 o
      3576    2  -9  -1  15  1398.31  1462.24    25.32 o
      3576    1   2   1  15  1398.31  1462.24    25.32 o
      3577    2 -10  -1  15   366.16   472.58    13.81 o
      3577    1   3   1  15   366.16   472.58    13.81 o
      3578    2 -11  -1  15    32.51    52.55     9.59 o
      3578    1   4   1  15    32.51    52.55     9.59 o
      3579    2 -12  -1  15   517.74   530.12    17.65 o
      3579    1   5   1  15   517.74   530.12    17.65 o
      3580    2 -13  -1  15   182.74   172.62    11.51 o
      3580    1   6   1  15   182.74   172.62    11.51 o
      3581    2 -14  -1  15   921.81   964.34    15.73 o
      3581    1   7   1  15   921.81   964.34    15.73 o
      3582    2 -15  -1  15  1516.49  1431.93    19.56 o
      3582    1   8   1  15  1516.49  1431.93    19.56 o
      3583    2 -16  -1  15   980.61   970.48    16.11 o
      3583    1   9   1  15   980.61   970.48    16.11 o
      3584    2 -17  -1  15   264.39   274.65    13.04 o
      3584    1  10   1  15   264.39   274.65    13.04 o
      3585    2 -18  -1  15   116.03   117.38     9.97 o
      3585    1  11   1  15   116.03   117.38     9.97 o
      3586    2 -19  -1  15    99.59   113.54    13.43 o
      3586    1  12   1  15    99.59   113.54    13.43 o
      3587    2 -20  -1  15    47.38   112.78    34.91 o
      3587    1  13   1  15    47.38   112.78    34.91 o
      3588    2 -21  -1  15    37.97    16.11    16.88 <
      3588    1  14   1  15    37.97    16.11    16.88 <
      3589    2 -22  -1  15   353.86   401.62    31.07 o
      3589    1  15   1  15   353.86   401.62    31.07 o
      3590    2  15  -2  15     5.94    41.81    48.33 <
      3590    1 -22   2  15     5.94    41.81    48.33 <
      3591    2  14  -2  15   113.90   181.05    38.36 o
      3591    1 -21   2  15   113.90   181.05    38.36 o
      3592    2  13  -2  15   740.37   703.50    57.15 o
      3592    1 -20   2  15   740.37   703.50    57.15 o
      3593    2  12  -2  15   123.82   111.62    31.84 o
      3593    1 -19   2  15   123.82   111.62    31.84 o
      3594    2  11  -2  15   100.00    79.40    19.18 o
      3594    1 -18   2  15   100.00    79.40    19.18 o
      3595    2  10  -2  15    73.73    47.95    16.49 <
      3595    1 -17   2  15    73.73    47.95    16.49 <
      3596    2   9  -2  15    44.62    36.06    18.41 <
      3596    1 -16   2  15    44.62    36.06    18.41 <
      3597    2   8  -2  15    34.61    37.59    18.80 <
      3597    1 -15   2  15    34.61    37.59    18.80 <
      3598    2   7  -2  15    36.15    46.80    19.56 <
      3598    1 -14   2  15    36.15    46.80    19.56 <
      3599    2   6  -2  15   173.88   187.57    24.17 o
      3599    1 -13   2  15   173.88   187.57    24.17 o
      3600    2   5  -2  15   737.18   760.66    41.81 o
      3600    1 -12   2  15   737.18   760.66    41.81 o
      3601    2   4  -2  15   453.02   476.03    24.17 o
      3601    1 -11   2  15   453.02   476.03    24.17 o
      3602    2   3  -2  15   484.06   472.20    23.02 o
      3602    1 -10   2  15   484.06   472.20    23.02 o
      3603    2   2  -2  15    44.55    39.51    12.27 o
      3603    1  -9   2  15    44.55    39.51    12.27 o
      3604    2   1  -2  15    35.54    23.78     9.97 <
      3604    1  -8   2  15    35.54    23.78     9.97 <
      3605    2   0  -2  15    21.86    43.73    12.27 o
      3605    1  -7   2  15    21.86    43.73    12.27 o
      3606    2  -1  -2  15   467.80   448.41    19.18 o
      3606    1  -6   2  15   467.80   448.41    19.18 o
      3607    2  -2  -2  15    50.90    65.59    14.19 o
      3607    1  -5   2  15    50.90    65.59    14.19 o
      3608    2  -4  -2  15  4140.97  3975.12    55.24 o
      3608    1  -3   2  15  4140.97  3975.12    55.24 o
      3609    2  -5  -2  15   402.46   382.82    16.49 o
      3609    1  -2   2  15   402.46   382.82    16.49 o
      3610    2  -6  -2  15    29.13    43.35    13.04 o
      3610    1  -1   2  15    29.13    43.35    13.04 o
      3611    2  -7  -2  15   562.57   516.31    29.15 o
      3611    1   0   2  15   562.57   516.31    29.15 o
      3612    2  -8  -2  15     1.90   -25.70    16.11 <
      3612    1   1   2  15     1.90   -25.70    16.11 <
      3613    2  -9  -2  15    15.42   -10.74    16.11 <
      3613    1   2   2  15    15.42   -10.74    16.11 <
      3614    2 -10  -2  15    20.62    32.60    17.26 <
      3614    1   3   2  15    20.62    32.60    17.26 <
      3615    2 -11  -2  15   350.72   368.63    24.17 o
      3615    1   4   2  15   350.72   368.63    24.17 o
      3616    2 -12  -2  15   721.31   743.39    32.99 o
      3616    1   5   2  15   721.31   743.39    32.99 o
      3617    2 -13  -2  15    47.31    56.00    18.80 <
      3617    1   6   2  15    47.31    56.00    18.80 <
      3618    2 -14  -2  15   257.85   246.26    22.25 o
      3618    1   7   2  15   257.85   246.26    22.25 o
      3619    2 -15  -2  15    43.25    45.65    18.41 <
      3619    1   8   2  15    43.25    45.65    18.41 <
      3620    2 -16  -2  15   115.57    97.05    11.12 o
      3620    1   9   2  15   115.57    97.05    11.12 o
      3621    2 -17  -2  15    14.70    22.25     9.59 <
      3621    1  10   2  15    14.70    22.25     9.59 <
      3622    2 -18  -2  15    19.53    25.70     9.59 <
      3622    1  11   2  15    19.53    25.70     9.59 <
      3623    2 -19  -2  15    17.73    25.70     9.59 <
      3623    1  12   2  15    17.73    25.70     9.59 <
      3624    2 -20  -2  15    64.91   103.95    11.51 o
      3624    1  13   2  15    64.91   103.95    11.51 o
      3625    2 -21  -2  15   329.67   297.28    17.26 o
      3625    1  14   2  15   329.67   297.28    17.26 o
      3626    2 -22  -2  15    85.36    71.35    14.58 o
      3626    1  15   2  15    85.36    71.35    14.58 o
      3627    2  13  -3  15    10.31     2.69    33.37 <
      3627    1 -20   3  15    10.31     2.69    33.37 <
      3628    2  12  -3  15    83.34    91.68    28.00 o
      3628    1 -19   3  15    83.34    91.68    28.00 o
      3629    2  11  -3  15   159.55   170.70    30.69 o
      3629    1 -18   3  15   159.55   170.70    30.69 o
      3630    2  10  -3  15    68.44    98.58    28.39 o
      3630    1 -17   3  15    68.44    98.58    28.39 o
      3631    2   9  -3  15     9.56    14.19    21.10 <
      3631    1 -16   3  15     9.56    14.19    21.10 <
      3632    2   8  -3  15    64.11   125.43    24.93 o
      3632    1 -15   3  15    64.11   125.43    24.93 o
      3633    2   7  -3  15    51.03    49.10    21.48 <
      3633    1 -14   3  15    51.03    49.10    21.48 <
      3634    2   6  -3  15     7.63    29.54    26.85 <
      3634    1 -13   3  15     7.63    29.54    26.85 <
      3635    2   5  -3  15    22.15    65.98    29.92 <
      3635    1 -12   3  15    22.15    65.98    29.92 <
      3636    2   4  -3  15    80.13   119.68    22.63 o
      3636    1 -11   3  15    80.13   119.68    22.63 o
      3637    2   3  -3  15    20.67    56.39    20.33 <
      3637    1 -10   3  15    20.67    56.39    20.33 <
      3638    2   2  -3  15     0.50    11.51    17.65 <
      3638    1  -9   3  15     0.50    11.51    17.65 <
      3639    2   1  -3  15    61.39    78.25    18.41 o
      3639    1  -8   3  15    61.39    78.25    18.41 o
      3640    2   0  -3  15   576.09   586.51    26.08 o
      3640    1  -7   3  15   576.09   586.51    26.08 o
      3641    2  -1  -3  15   159.18   184.12    18.41 o
      3641    1  -6   3  15   159.18   184.12    18.41 o
      3642    2  -2  -3  15   712.65   754.13    31.84 o
      3642    1  -5   3  15   712.65   754.13    31.84 o
      3643    2  -3  -3  15   365.87   369.39    23.78 o
      3643    1  -4   3  15   365.87   369.39    23.78 o
      3644    2  -4  -3  15   166.79   209.05    23.02 o
      3644    1  -3   3  15   166.79   209.05    23.02 o
      3645    2  -5  -3  15   254.43   317.99    26.08 o
      3645    1  -2   3  15   254.43   317.99    26.08 o
      3646    2  -6  -3  15   136.96   107.79    19.95 o
      3646    1  -1   3  15   136.96   107.79    19.95 o
      3647    2  -7  -3  15   281.77   285.39    82.86 o
      3647    1   0   3  15   281.77   285.39    82.86 o
      3648    2  -8  -3  15   337.08   391.26    99.35 o
      3648    1   1   3  15   337.08   391.26    99.35 o
      3649    2  -9  -3  15     8.55   -30.69    53.32 <
      3649    1   2   3  15     8.55   -30.69    53.32 <
      3650    2 -10  -3  15   536.97   464.52    66.74 o
      3650    1   3   3  15   536.97   464.52    66.74 o
      3651    2 -11  -3  15   419.77   528.97    69.43 o
      3651    1   4   3  15   419.77   528.97    69.43 o
      3652    2 -12  -3  15   501.82   470.28    67.51 o
      3652    1   5   3  15   501.82   470.28    67.51 o
      3653    2 -13  -3  15   169.74   151.90    33.37 o
      3653    1   6   3  15   169.74   151.90    33.37 o
      3654    2 -14  -3  15   104.05    76.33    30.30 <
      3654    1   7   3  15   104.05    76.33    30.30 <
      3655    2 -15  -3  15   352.30   305.72    40.66 o
      3655    1   8   3  15   352.30   305.72    40.66 o
      3656    2 -16  -3  15   143.28   178.37    35.29 o
      3656    1   9   3  15   143.28   178.37    35.29 o
      3657    2 -17  -3  15   238.01   237.44    39.51 o
      3657    1  10   3  15   238.01   237.44    39.51 o
      3658    2 -18  -3  15   198.26   233.99    20.33 o
      3658    1  11   3  15   198.26   233.99    20.33 o
      3659    2 -19  -3  15   244.57   261.99    18.41 o
      3659    1  12   3  15   244.57   261.99    18.41 o
      3660    2 -20  -3  15   239.62   233.22    18.80 o
      3660    1  13   3  15   239.62   233.22    18.80 o
      3661    2  11  -4  15   126.08    92.06    25.32 o
      3661    1 -18   4  15   126.08    92.06    25.32 o
      3662    2  10  -4  15    19.10    31.84    21.86 <
      3662    1 -17   4  15    19.10    31.84    21.86 <
      3663    2   9  -4  15     2.20   -17.26    19.18 <
      3663    1 -16   4  15     2.20   -17.26    19.18 <
      3664    2   8  -4  15     8.80    28.39    20.71 <
      3664    1 -15   4  15     8.80    28.39    20.71 <
      3665    2   7  -4  15   584.61   594.18    47.56 o
      3665    1 -14   4  15   584.61   594.18    47.56 o
      3666    2   6  -4  15   586.89   569.63    46.03 o
      3666    1 -13   4  15   586.89   569.63    46.03 o
      3667    2   5  -4  15   655.29   637.14    47.95 o
      3667    1 -12   4  15   655.29   637.14    47.95 o
      3668    2   4  -4  15  1194.84  1402.01    70.58 o
      3668    1 -11   4  15  1194.84  1402.01    70.58 o
      3669    2   3  -4  15   659.52   651.72    37.98 o
      3669    1 -10   4  15   659.52   651.72    37.98 o
      3670    2   2  -4  15   493.44   524.75    42.58 o
      3670    1  -9   4  15   493.44   524.75    42.58 o
      3671    2   1  -4  15    43.97    45.26    23.78 <
      3671    1  -8   4  15    43.97    45.26    23.78 <
      3672    2   0  -4  15   136.29   111.24    29.54 o
      3672    1  -7   4  15   136.29   111.24    29.54 o
      3673    2  -1  -4  15   316.11   406.99    47.95 o
      3673    1  -6   4  15   316.11   406.99    47.95 o
      3674    2  -2  -4  15   249.48   230.92    24.17 o
      3674    1  -5   4  15   249.48   230.92    24.17 o
      3675    2  -3  -4  15  1183.32  1180.30    49.10 o
      3675    1  -4   4  15  1183.32  1180.30    49.10 o
      3676    2  -4  -4  15   597.97   705.42    41.81 o
      3676    1  -3   4  15   597.97   705.42    41.81 o
      3677    2  -5  -4  15   435.85   421.56    32.99 o
      3677    1  -2   4  15   435.85   421.56    32.99 o
      3678    2  -6  -4  15   210.47   180.29    22.63 o
      3678    1  -1   4  15   210.47   180.29    22.63 o
      3679    2  -7  -4  15    45.31    51.40    19.56 <
      3679    1   0   4  15    45.31    51.40    19.56 <
      3680    2  -8  -4  15   137.22    44.50    36.82 <
      3680    1   1   4  15   137.22    44.50    36.82 <
      3681    2  -9  -4  15    66.33    62.14    41.43 <
      3681    1   2   4  15    66.33    62.14    41.43 <
      3682    2 -10  -4  15   340.36   274.65    52.94 o
      3682    1   3   4  15   340.36   274.65    52.94 o
      3683    2 -11  -4  15  1199.77  1178.00    92.44 o
      3683    1   4   4  15  1199.77  1178.00    92.44 o
      3684    2 -12  -4  15   288.72   301.50    59.07 o
      3684    1   5   4  15   288.72   301.50    59.07 o
      3685    2 -13  -4  15   509.21   484.47    54.09 o
      3685    1   6   4  15   509.21   484.47    54.09 o
      3686    2 -14  -4  15   479.99   403.92    50.63 o
      3686    1   7   4  15   479.99   403.92    50.63 o
      3687    2 -15  -4  15   151.50   128.88    42.58 o
      3687    1   8   4  15   151.50   128.88    42.58 o
      3688    2 -16  -4  15     5.93   -52.17    33.37 <
      3688    1   9   4  15     5.93   -52.17    33.37 <
      3689    2 -18  -4  15    18.36    71.35    36.06 <
      3689    1  11   4  15    18.36    71.35    36.06 <
      3690    2 -19  -4  15    16.50    73.65    43.35 <
      3690    1  12   4  15    16.50    73.65    43.35 <
      3691    2   9  -5  15    12.20     4.22    21.48 <
      3691    1 -16   5  15    12.20     4.22    21.48 <
      3692    2   8  -5  15    22.35    31.45    23.78 <
      3692    1 -15   5  15    22.35    31.45    23.78 <
      3693    2   7  -5  15   315.40   309.94    34.52 o
      3693    1 -14   5  15   315.40   309.94    34.52 o
      3694    2   6  -5  15   194.98   203.68    30.30 o
      3694    1 -13   5  15   194.98   203.68    30.30 o
      3695    2   5  -5  15     3.12   -19.56    23.02 <
      3695    1 -12   5  15     3.12   -19.56    23.02 <
      3696    2   4  -5  15    72.26   102.80    36.82 <
      3696    1 -11   5  15    72.26   102.80    36.82 <
      3697    2   3  -5  15    89.41   150.75    36.06 o
      3697    1 -10   5  15    89.41   150.75    36.06 o
      3698    2   2  -5  15   271.10   364.41    45.26 o
      3698    1  -9   5  15   271.10   364.41    45.26 o
      3699    2   1  -5  15    28.57    21.48    23.78 <
      3699    1  -8   5  15    28.57    21.48    23.78 <
      3700    2   0  -5  15    31.29    29.54    23.40 <
      3700    1  -7   5  15    31.29    29.54    23.40 <
      3701    2  -1  -5  15   238.01   315.31    37.59 o
      3701    1  -6   5  15   238.01   315.31    37.59 o
      3702    2  -2  -5  15   208.92   237.44    31.84 o
      3702    1  -5   5  15   208.92   237.44    31.84 o
      3703    2  -3  -5  15    40.85    62.52    28.77 <
      3703    1  -4   5  15    40.85    62.52    28.77 <
      3704    2  -4  -5  15   131.97   116.99    18.80 o
      3704    1  -3   5  15   131.97   116.99    18.80 o
      3705    2  -5  -5  15     8.25    15.34    16.88 <
      3705    1  -2   5  15     8.25    15.34    16.88 <
      3706    2  -6  -5  15    10.85    37.21    17.65 <
      3706    1  -1   5  15    10.85    37.21    17.65 <
      3707    2  -7  -5  15     3.45     4.60    17.26 <
      3707    1   0   5  15     3.45     4.60    17.26 <
      3708    2  -8  -5  15    47.71    58.69    21.86 <
      3708    1   1   5  15    47.71    58.69    21.86 <
      3709    2  -9  -5  15   356.52   352.52    28.39 o
      3709    1   2   5  15   356.52   352.52    28.39 o
      3710    2 -10  -5  15   475.31   414.27    40.28 o
      3710    1   3   5  15   475.31   414.27    40.28 o
      3711    2 -11  -5  15   518.59   512.47    56.77 o
      3711    1   4   5  15   518.59   512.47    56.77 o
      3712    2 -12  -5  15    83.62    71.73    39.51 <
      3712    1   5   5  15    83.62    71.73    39.51 <
      3713    2 -13  -5  15    55.26    -9.59    34.52 <
      3713    1   6   5  15    55.26    -9.59    34.52 <
      3714    2 -14  -5  15    20.40    -8.44    37.21 <
      3714    1   7   5  15    20.40    -8.44    37.21 <
      3715    2 -15  -5  15    34.73   -14.58    40.28 <
      3715    1   8   5  15    34.73   -14.58    40.28 <
      3716    2 -16  -5  15     1.35   -58.31    41.43 <
      3716    1   9   5  15     1.35   -58.31    41.43 <
      3717    2   4  -6  15   123.43   127.35    29.15 o
      3717    1 -11   6  15   123.43   127.35    29.15 o
      3718    2   3  -6  15   326.28   353.28    37.98 o
      3718    1 -10   6  15   326.28   353.28    37.98 o
      3719    2   2  -6  15    57.90   177.60    43.73 o
      3719    1  -9   6  15    57.90   177.60    43.73 o
      3720    2   1  -6  15   730.55   870.36    77.10 o
      3720    1  -8   6  15   730.55   870.36    77.10 o
      3721    2   0  -6  15  1053.49  1018.04    77.48 o
      3721    1  -7   6  15  1053.49  1018.04    77.48 o
      3722    2  -1  -6  15   251.05   292.29    28.00 o
      3722    1  -6   6  15   251.05   292.29    28.00 o
      3723    2  -2  -6  15   407.21   427.70    30.69 o
      3723    1  -5   6  15   407.21   427.70    30.69 o
      3724    2  -3  -6  15   220.90   218.65    24.93 o
      3724    1  -4   6  15   220.90   218.65    24.93 o
      3725    2  -4  -6  15   224.16   209.44    21.86 o
      3725    1  -3   6  15   224.16   209.44    21.86 o
      3726    2  -5  -6  15   331.44   326.82    24.55 o
      3726    1  -2   6  15   331.44   326.82    24.55 o
      3727    2  -6  -6  15   216.48   163.41    31.07 o
      3727    1  -1   6  15   216.48   163.41    31.07 o
      3728    2  -7  -6  15   637.97   618.34    41.81 o
      3728    1   0   6  15   637.97   618.34    41.81 o
      3729    2  -8  -6  15   774.07   639.06    42.58 o
      3729    1   1   6  15   774.07   639.06    42.58 o
      3730    2  -9  -6  15   333.07   292.68    19.95 o
      3730    1   2   6  15   333.07   292.68    19.95 o
      3731    2 -10  -6  15   173.18   166.48    17.26 o
      3731    1   3   6  15   173.18   166.48    17.26 o
      3732    2 -11  -6  15   122.59   108.94    16.11 o
      3732    1   4   6  15   122.59   108.94    16.11 o
      3733    1 -22   0  16   150.42    16.88    54.47 <
      3734    1 -21   0  16   699.07   684.32    85.54 o
      3735    1 -20   0  16  1198.35  1124.68    69.43 o
      3736    1 -19   0  16   770.03   738.02    55.62 o
      3737    1 -18   0  16   273.29   256.62    48.33 o
      3738    1 -17   0  16   555.93   605.68    66.36 o
      3739    1 -16   0  16   478.80   549.68    59.84 o
      3740    1 -15   0  16   199.00   233.22    41.43 o
      3741    1 -14   0  16  1957.67  1698.91    82.47 o
      3742    1 -13   0  16  3664.16  3524.79   123.51 o
      3743    1 -12   0  16  1369.30  1367.87    72.88 o
      3744    1 -11   0  16  2019.41  1968.19    66.36 o
      3745    1 -10   0  16  3274.90  3372.50    88.99 o
      3746    1  -9   0  16   189.48   178.37    16.88 o
      3747    1  -8   0  16   451.19   485.24    27.23 o
      3748    1  -7   0  16  1206.16  1178.00    35.67 o
      3749    1  -6   0  16   224.28   224.78    15.73 o
      3750    1  -5   0  16   863.27   894.14    37.21 o
      3751    1  -4   0  16  3551.25  3586.55    54.85 o
      3752    1  -3   0  16  6363.79  6159.27    81.32 o
      3753    1  -2   0  16  5197.54  5286.22    72.50 o
      3754    1  -1   0  16     5.95    -3.84    10.36 <
      3755    1   0   0  16   588.35   537.02    20.33 o
      3756    1   1   0  16   416.33   406.60    28.00 o
      3757    1   2   0  16   918.79   761.42    32.99 o
      3758    1   3   0  16   154.95   166.86    16.49 o
      3759    1   4   0  16   348.51   291.91    23.02 o
      3760    1   5   0  16   652.66   605.30    28.00 o
      3761    1   6   0  16   749.55   663.22    28.77 o
      3762    1   7   0  16   398.55   417.34    16.88 o
      3763    1   8   0  16   196.07   164.94    12.27 o
      3764    1   9   0  16    50.10    59.07    13.04 o
      3765    1  10   0  16     0.89    18.41    12.27 <
      3766    1  11   0  16    12.46     6.14    12.66 <
      3767    1  12   0  16     3.55    18.80    14.19 <
      3768    1  13   0  16    37.71    40.28    16.11 <
      3769    1  14   0  16    99.63   126.58    21.48 o
      3770    1  15   0  16   345.06   314.93    29.92 o
      3771    1 -22   1  16    43.82   -97.81    25.32 <
      3772    1 -21   1  16   346.55   286.16    42.96 o
      3773    1 -20   1  16    72.88    37.21    29.54 <
      3774    1 -19   1  16     0.44    -6.90    24.17 <
      3775    1 -18   1  16    15.26   -14.96    23.40 <
      3776    1 -17   1  16    66.20    16.11    23.02 <
      3777    1 -16   1  16   176.99   178.37    30.69 o
      3778    1 -15   1  16     6.77   -32.22    18.80 <
      3779    1 -14   1  16    25.35    11.12    13.81 <
      3780    1 -13   1  16    28.67    14.96    14.96 <
      3781    1 -12   1  16    88.61    82.47    19.56 o
      3782    1 -11   1  16    48.90    54.47    17.26 o
      3783    1 -10   1  16   509.94   519.76    21.86 o
      3784    1  -9   1  16   227.90   218.65    18.41 o
      3785    1  -8   1  16   585.39   596.86    25.70 o
      3786    1  -7   1  16    10.82    -2.30     7.67 <
      3787    1  -6   1  16     0.12    -5.75     7.67 <
      3788    1  -5   1  16    23.55    34.14     8.82 o
      3789    1  -4   1  16  2264.06  2010.77    29.15 o
      3790    1  -3   1  16    64.17    59.84    10.36 o
      3791    1  -2   1  16   441.88   417.73    15.34 o
      3792    1  -1   1  16    40.81    56.39     9.97 o
      3793    1   0   1  16   682.44   650.57    19.18 o
      3794    1   1   1  16   386.98   357.89    15.34 o
      3795    1   2   1  16   749.75   750.68    20.33 o
      3796    1   3   1  16     0.29     3.84     8.82 <
      3797    1   4   1  16   111.14    92.83    11.51 o
      3798    1   5   1  16    26.43    29.92     9.97 o
      3799    1   6   1  16    91.81    72.88     9.97 o
      3800    1   7   1  16    47.15    44.88     6.14 o
      3801    1   8   1  16    40.76    32.99     6.90 o
      3802    1   9   1  16    33.21    35.67     7.67 o
      3803    1  10   1  16     8.81     3.84     6.90 <
      3804    1  11   1  16     0.12     7.67     8.06 <
      3805    1  12   1  16    71.20    55.62    16.49 o
      3806    1  13   1  16    64.61    74.80    18.41 o
      3807    1  14   1  16    22.34     1.92    15.34 <
      3808    1  15   1  16   180.39   190.64    25.32 o
      3809    1 -21   2  16   513.15   539.32    61.37 o
      3810    1 -20   2  16   466.59   492.91    56.00 o
      3811    1 -19   2  16   476.97   546.23    57.54 o
      3812    1 -18   2  16   512.24   562.72    41.81 o
      3813    1 -17   2  16   574.25   486.39    31.07 o
      3814    1 -16   2  16    88.55    79.79    23.02 o
      3815    1 -15   2  16     4.37    -4.22    16.88 <
      3816    1 -14   2  16   452.13   459.15    35.67 o
      3817    1 -13   2  16   589.36   573.08    37.59 o
      3818    1 -12   2  16   301.22   346.00    41.04 o
      3819    1 -11   2  16  1762.99  1632.55    44.50 o
      3820    1 -10   2  16  2215.34  2069.46    49.48 o
      3821    1  -9   2  16  1789.62  1684.72    38.36 o
      3822    1  -8   2  16  1350.27  1222.11    33.37 o
      3823    1  -7   2  16   488.98   463.76    21.10 o
      3824    1  -6   2  16  1344.49  1309.95    35.29 o
      3825    1  -5   2  16   348.80   373.23    24.55 o
      3826    1  -4   2  16   272.11   207.14    19.95 o
      3827    1  -3   2  16  1472.89  1338.72    31.07 o
      3828    1  -2   2  16   225.47   227.47    16.88 o
      3829    1  -1   2  16   362.80   356.74    18.41 o
      3830    1   0   2  16   381.74   355.97    26.47 o
      3831    1   1   2  16   143.79   144.23    21.86 o
      3832    1   2   2  16    84.86    52.55    17.65 <
      3833    1   3   2  16   139.02   107.02    20.33 o
      3834    1   4   2  16   987.51   908.72    40.66 o
      3835    1   5   2  16   253.12   239.36    22.63 o
      3836    1   6   2  16   331.28   302.27    30.30 o
      3837    1   7   2  16   329.85   322.98    24.93 o
      3838    1   8   2  16    16.13    19.95    12.27 <
      3839    1   9   2  16    21.74    37.21    10.36 o
      3840    1  10   2  16   147.02   171.46    12.66 o
      3841    1  11   2  16     4.75    28.39     9.97 <
      3842    1  12   2  16    11.14    14.58    11.89 <
      3843    1  13   2  16    12.07    17.65    11.12 <
      3844    1  14   2  16    43.76    41.81    19.95 <
      3845    1 -20   3  16   293.86   259.30    52.55 o
      3846    1 -19   3  16   480.77   517.84    46.03 o
      3847    1 -18   3  16   185.34   118.14    28.77 o
      3848    1 -17   3  16   734.74   620.26    43.73 o
      3849    1 -16   3  16   204.35   207.90    31.84 o
      3850    1 -15   3  16   243.66   246.65    32.22 o
      3851    1 -14   3  16   175.14   236.67    42.96 o
      3852    1 -13   3  16   125.40   133.49    37.21 o
      3853    1 -12   3  16    69.27    54.09    31.07 <
      3854    1 -11   3  16    61.86    39.51    18.80 <
      3855    1 -10   3  16   318.84   293.45    30.30 o
      3856    1  -9   3  16  1368.12  1297.68    41.43 o
      3857    1  -8   3  16   902.10   901.82    40.28 o
      3858    1  -7   3  16    56.73    60.61    15.73 o
      3859    1  -6   3  16   126.39   142.31    18.80 o
      3860    1  -5   3  16    54.01    49.10    16.11 o
      3861    1  -4   3  16    10.64    82.47    58.69 <
      3862    1  -3   3  16    27.99     5.37    15.34 <
      3863    1  -2   3  16  1194.81  1103.58    47.18 o
      3864    1  -1   3  16   732.43   780.60    37.21 o
      3865    1   0   3  16   221.27   204.84    80.17 <
      3866    1   1   3  16   948.77   811.67   125.82 o
      3867    1   2   3  16    58.88    33.37    66.74 <
      3868    1   3   3  16    66.86   108.17    47.56 <
      3869    1   4   3  16     2.06    -2.69    40.66 <
      3870    1   5   3  16    43.80    92.06    51.02 <
      3871    1   6   3  16   248.49   241.28    57.15 o
      3872    1   7   3  16   184.94   200.23    37.59 o
      3873    1   8   3  16   937.56   973.93    59.46 o
      3874    1   9   3  16   760.02   789.42    56.00 o
      3875    1  10   3  16    56.92    60.22    20.71 <
      3876    1  11   3  16    76.67    68.66    14.19 o
      3877    1  12   3  16     1.59    19.95    14.19 <
      3878    1  13   3  16    17.18    47.56    14.19 o
      3879    1 -18   4  16   193.70   177.99    35.67 o
      3880    1 -17   4  16   530.01   525.52    49.48 o
      3881    1 -16   4  16   404.67   430.77    45.65 o
      3882    1 -15   4  16  1258.01  1193.73    65.98 o
      3883    1 -14   4  16  1066.40  1030.70    62.52 o
      3884    1 -13   4  16   159.87   108.17    29.54 o
      3885    1 -12   4  16   283.13   280.79    36.82 o
      3886    1 -11   4  16    36.82    46.03    26.85 <
      3887    1 -10   4  16    23.77    48.33    27.23 <
      3888    1  -9   4  16   218.32   216.34    33.37 o
      3889    1  -8   4  16   287.07   311.47    45.65 o
      3890    1  -7   4  16   392.16   361.72    43.35 o
      3891    1  -6   4  16   889.86   840.06    61.37 o
      3892    1  -5   4  16   526.96   532.42    36.82 o
      3893    1  -4   4  16   186.30   220.18    29.15 o
      3894    1  -3   4  16   113.90   101.65    24.17 o
      3895    1  -2   4  16    78.07    62.14    24.17 <
      3896    1  -1   4  16   104.03   133.10    31.07 o
      3897    1   0   4  16   407.46   365.18    36.06 o
      3898    1   1   4  16   396.92   322.98    93.21 o
      3899    1   2   4  16   385.48   262.76   107.79 <
      3900    1   3   4  16   294.14   369.01    62.91 o
      3901    1   4   4  16     0.63   -22.25    39.51 <
      3902    1   5   4  16     2.43   -34.91    40.66 <
      3903    1   9   4  16    76.02   143.46    63.29 <
      3904    1  10   4  16   157.81   184.12    74.42 <
      3905    1  11   4  16   184.62   260.84    66.74 o
      3906    1 -15   5  16   108.86   126.58    28.77 o
      3907    1 -14   5  16    37.98    55.24    34.91 <
      3908    1 -13   5  16   225.75   232.45    42.58 o
      3909    1 -12   5  16   196.29   185.27    41.43 o
      3910    1 -11   5  16    17.38   -18.03    30.69 <
      3911    1 -10   5  16   244.08   268.13    42.19 o
      3912    1  -9   5  16   358.68   425.02    61.37 o
      3913    1  -8   5  16   177.83   197.16    31.84 o
      3914    1  -7   5  16   238.47   252.78    36.82 o
      3915    1  -6   5  16   105.93    60.22    26.85 <
      3916    1  -5   5  16   101.68    74.80    27.23 <
      3917    1  -4   5  16    66.72    56.77    29.15 <
      3918    1  -3   5  16    37.47    18.03    18.80 <
      3919    1  -2   5  16   260.74   265.83    28.00 o
      3920    1  -1   5  16   359.14   338.32    26.47 o
      3921    1   0   5  16   361.33   327.97    27.23 o
      3922    1   1   5  16   640.10   618.73    38.36 o
      3923    1   2   5  16   576.54   523.21    31.84 o
      3924    1   3   5  16   175.29   178.37    51.40 o
      3925    1   4   5  16   179.58   169.16    42.96 o
      3926    1   5   5  16   242.10   222.48    49.48 o
      3927    1   6   5  16    49.54   -29.15    38.74 <
      3928    1   7   5  16    86.19     7.29    43.35 <
      3929    1   8   5  16   154.52   108.56    49.48 <
      3930    1 -10   6  16    60.50    34.14    39.51 <
      3931    1  -9   6  16   140.07   124.67    42.96 <
      3932    1  -8   6  16   568.97   582.67    63.68 o
      3933    1  -7   6  16   543.17   584.59    37.98 o
      3934    1  -6   6  16   167.00   159.57    23.78 o
      3935    1  -5   6  16    37.52    29.92    18.03 <
      3936    1  -4   6  16     5.40    34.91    17.65 <
      3937    1  -3   6  16    30.26    53.32    18.80 <
      3938    1  -2   6  16    21.66    18.41    38.36 <
      3939    1  -1   6  16     1.73   -11.12    28.77 <
      3940    1   0   6  16    73.10    84.39    30.30 <
      3941    1   1   6  16   211.05   191.79    33.76 o
      3942    1   2   6  16   293.49   214.81    18.41 o
      3943    2  14  -1  17    22.07   -40.28    28.77 <
      3943    1 -22   1  17    22.07   -40.28    28.77 <
      3944    2  13  -1  17     2.83   -12.27    28.00 <
      3944    1 -21   1  17     2.83   -12.27    28.00 <
      3945    2  12  -1  17   137.06   115.46    34.52 o
      3945    1 -20   1  17   137.06   115.46    34.52 o
      3946    2  11  -1  17   357.12   293.83    39.89 o
      3946    1 -19   1  17   357.12   293.83    39.89 o
      3947    2  10  -1  17   538.95   493.29    44.50 o
      3947    1 -18   1  17   538.95   493.29    44.50 o
      3948    2   9  -1  17   713.19   676.27    51.40 o
      3948    1 -17   1  17   713.19   676.27    51.40 o
      3949    2   8  -1  17  1385.51  1353.68    52.55 o
      3949    1 -16   1  17  1385.51  1353.68    52.55 o
      3950    2   7  -1  17   534.66   528.20    37.98 o
      3950    1 -15   1  17   534.66   528.20    37.98 o
      3951    2   6  -1  17    49.91    40.28    19.18 <
      3951    1 -14   1  17    49.91    40.28    19.18 <
      3952    2   5  -1  17   448.99   458.77    44.88 o
      3952    1 -13   1  17   448.99   458.77    44.88 o
      3953    2   4  -1  17   564.43   648.65    39.13 o
      3953    1 -12   1  17   564.43   648.65    39.13 o
      3954    2   3  -1  17   262.98   328.73    25.70 o
      3954    1 -11   1  17   262.98   328.73    25.70 o
      3955    2   2  -1  17  1452.37  1440.76    36.82 o
      3955    1 -10   1  17  1452.37  1440.76    36.82 o
      3956    2   1  -1  17  4135.02  4253.61    65.21 o
      3956    1  -9   1  17  4135.02  4253.61    65.21 o
      3957    2   0  -1  17  2229.03  2333.36    51.02 o
      3957    1  -8   1  17  2229.03  2333.36    51.02 o
      3958    2  -1  -1  17   955.17   953.98    23.78 o
      3958    1  -7   1  17   955.17   953.98    23.78 o
      3959    2  -2  -1  17  2238.70  2235.55    32.99 o
      3959    1  -6   1  17  2238.70  2235.55    32.99 o
      3960    2  -3  -1  17  1422.54  1372.86    24.93 o
      3960    1  -5   1  17  1422.54  1372.86    24.93 o
      3961    2  -4  -1  17   103.36    91.68    10.36 o
      3961    1  -4   1  17   103.36    91.68    10.36 o
      3962    2  -5  -1  17   714.99   741.86    24.17 o
      3962    1  -3   1  17   714.99   741.86    24.17 o
      3963    2  -6  -1  17  3466.08  3537.45    48.33 o
      3963    1  -2   1  17  3466.08  3537.45    48.33 o
      3964    2  -7  -1  17  1879.90  1924.84    34.52 o
      3964    1  -1   1  17  1879.90  1924.84    34.52 o
      3965    2  -8  -1  17  1880.62  1952.85    35.29 o
      3965    1   0   1  17  1880.62  1952.85    35.29 o
      3966    2  -9  -1  17  3700.63  3673.24    48.33 o
      3966    1   1   1  17  3700.63  3673.24    48.33 o
      3967    2 -10  -1  17  1545.44  1497.53    30.69 o
      3967    1   2   1  17  1545.44  1497.53    30.69 o
      3968    2 -11  -1  17   560.50   556.59    21.86 o
      3968    1   3   1  17   560.50   556.59    21.86 o
      3969    2 -12  -1  17   624.04   589.57    21.86 o
      3969    1   4   1  17   624.04   589.57    21.86 o
      3970    2 -13  -1  17   450.74   401.23    19.18 o
      3970    1   5   1  17   450.74   401.23    19.18 o
      3971    2 -14  -1  17   479.87   397.40    16.49 o
      3971    1   6   1  17   479.87   397.40    16.49 o
      3972    2 -15  -1  17  1001.63   945.16    17.26 o
      3972    1   7   1  17  1001.63   945.16    17.26 o
      3973    2 -16  -1  17  1149.58  1146.93    23.78 o
      3973    1   8   1  17  1149.58  1146.93    23.78 o
      3974    2 -17  -1  17   801.12   831.62    21.48 o
      3974    1   9   1  17   801.12   831.62    21.48 o
      3975    2 -18  -1  17   622.01   611.82    19.56 o
      3975    1  10   1  17   622.01   611.82    19.56 o
      3976    2 -19  -1  17   284.69   258.92    18.41 o
      3976    1  11   1  17   284.69   258.92    18.41 o
      3977    2 -20  -1  17   151.08   168.01    20.71 o
      3977    1  12   1  17   151.08   168.01    20.71 o
      3978    2 -21  -1  17    45.91     6.90    15.34 <
      3978    1  13   1  17    45.91     6.90    15.34 <
      3979    2 -22  -1  17    39.54    47.18    18.80 <
      3979    1  14   1  17    39.54    47.18    18.80 <
      3980    2  13  -2  17    70.68    25.70    32.99 <
      3980    1 -21   2  17    70.68    25.70    32.99 <
      3981    2  12  -2  17   685.73   653.63    65.59 o
      3981    1 -20   2  17   685.73   653.63    65.59 o
      3982    2  11  -2  17     9.75    -5.75    19.95 <
      3982    1 -19   2  17     9.75    -5.75    19.95 <
      3983    2  10  -2  17   128.43   147.68    29.15 o
      3983    1 -18   2  17   128.43   147.68    29.15 o
      3984    2   9  -2  17   223.06   291.14    47.18 o
      3984    1 -17   2  17   223.06   291.14    47.18 o
      3985    2   8  -2  17   236.20   181.05    37.59 o
      3985    1 -16   2  17   236.20   181.05    37.59 o
      3986    2   7  -2  17    46.30    56.00    28.77 <
      3986    1 -15   2  17    46.30    56.00    28.77 <
      3987    2   6  -2  17    30.11    13.43    25.70 <
      3987    1 -14   2  17    30.11    13.43    25.70 <
      3988    2   5  -2  17     3.74    37.59    27.62 <
      3988    1 -13   2  17     3.74    37.59    27.62 <
      3989    2   4  -2  17   185.82   190.64    36.82 o
      3989    1 -12   2  17   185.82   190.64    36.82 o
      3990    2   3  -2  17   633.02   600.70    32.99 o
      3990    1 -11   2  17   633.02   600.70    32.99 o
      3991    2   2  -2  17   416.29   441.89    24.93 o
      3991    1 -10   2  17   416.29   441.89    24.93 o
      3992    2   1  -2  17     9.28    30.69    14.19 <
      3992    1  -9   2  17     9.28    30.69    14.19 <
      3993    2   0  -2  17   220.32   184.89    19.18 o
      3993    1  -8   2  17   220.32   184.89    19.18 o
      3994    2  -1  -2  17   163.83   146.91    15.34 o
      3994    1  -7   2  17   163.83   146.91    15.34 o
      3995    2  -2  -2  17    31.05     6.52    13.43 <
      3995    1  -6   2  17    31.05     6.52    13.43 <
      3996    2  -3  -2  17   278.50   244.73    21.10 o
      3996    1  -5   2  17   278.50   244.73    21.10 o
      3997    2  -4  -2  17    85.33    86.31    17.26 o
      3997    1  -4   2  17    85.33    86.31    17.26 o
      3998    2  -5  -2  17  1481.79  1362.12    41.81 o
      3998    1  -3   2  17  1481.79  1362.12    41.81 o
      3999    2  -6  -2  17   433.17   467.59    27.23 o
      3999    1  -2   2  17   433.17   467.59    27.23 o
      4000    2  -7  -2  17   109.97   140.39    17.26 o
      4000    1  -1   2  17   109.97   140.39    17.26 o
      4001    2  -8  -2  17    25.07     0.00    11.12 <
      4001    1   0   2  17    25.07     0.00    11.12 <
      4002    2  -9  -2  17   101.33    84.01    23.02 o
      4002    1   1   2  17   101.33    84.01    23.02 o
      4003    2 -10  -2  17   394.15   388.96    29.54 o
      4003    1   2   2  17   394.15   388.96    29.54 o
      4004    2 -11  -2  17   301.08   261.61    24.55 o
      4004    1   3   2  17   301.08   261.61    24.55 o
      4005    2 -12  -2  17    31.95    24.17    19.18 <
      4005    1   4   2  17    31.95    24.17    19.18 <
      4006    2 -13  -2  17    60.66    -4.22    29.92 <
      4006    1   5   2  17    60.66    -4.22    29.92 <
      4007    2 -14  -2  17   136.41   130.04    26.85 o
      4007    1   6   2  17   136.41   130.04    26.85 o
      4008    2 -15  -2  17    80.60    69.81    14.19 o
      4008    1   7   2  17    80.60    69.81    14.19 o
      4009    2 -16  -2  17    54.26    44.50     9.97 o
      4009    1   8   2  17    54.26    44.50     9.97 o
      4010    2 -17  -2  17    95.20    96.28    11.12 o
      4010    1   9   2  17    95.20    96.28    11.12 o
      4011    2 -18  -2  17    96.33    95.51    11.12 o
      4011    1  10   2  17    96.33    95.51    11.12 o
      4012    2 -19  -2  17    10.20    24.55     9.21 <
      4012    1  11   2  17    10.20    24.55     9.21 <
      4013    2 -20  -2  17   222.82   223.63    13.04 o
      4013    1  12   2  17   222.82   223.63    13.04 o
      4014    2 -21  -2  17     2.84    13.04    16.49 <
      4014    1  13   2  17     2.84    13.04    16.49 <
      4015    2  12  -3  17   227.67   232.84    51.02 o
      4015    1 -20   3  17   227.67   232.84    51.02 o
      4016    2  11  -3  17   167.70   143.08    31.84 o
      4016    1 -19   3  17   167.70   143.08    31.84 o
      4017    2  10  -3  17    10.36    64.06    26.85 <
      4017    1 -18   3  17    10.36    64.06    26.85 <
      4018    2   9  -3  17   285.75   254.32    34.91 o
      4018    1 -17   3  17   285.75   254.32    34.91 o
      4019    2   8  -3  17   315.90   369.78    39.89 o
      4019    1 -16   3  17   315.90   369.78    39.89 o
      4020    2   7  -3  17   132.28   166.48    39.89 o
      4020    1 -15   3  17   132.28   166.48    39.89 o
      4021    2   6  -3  17   464.77   483.32    57.92 o
      4021    1 -14   3  17   464.77   483.32    57.92 o
      4022    2   5  -3  17   467.15   493.29    56.00 o
      4022    1 -13   3  17   467.15   493.29    56.00 o
      4023    2   4  -3  17   724.25   726.90    64.44 o
      4023    1 -12   3  17   724.25   726.90    64.44 o
      4024    2   3  -3  17   481.44   382.05    50.25 o
      4024    1 -11   3  17   481.44   382.05    50.25 o
      4025    2   2  -3  17    86.07    80.94    18.41 o
      4025    1 -10   3  17    86.07    80.94    18.41 o
      4026    2   1  -3  17   343.74   370.93    30.30 o
      4026    1  -9   3  17   343.74   370.93    30.30 o
      4027    2   0  -3  17  1064.15  1135.04    50.25 o
      4027    1  -8   3  17  1064.15  1135.04    50.25 o
      4028    2  -1  -3  17   493.12   408.14    34.14 o
      4028    1  -7   3  17   493.12   408.14    34.14 o
      4029    2  -2  -3  17   751.29   729.20    32.99 o
      4029    1  -6   3  17   751.29   729.20    32.99 o
      4030    2  -3  -3  17  2299.21  2199.49    56.39 o
      4030    1  -5   3  17  2299.21  2199.49    56.39 o
      4031    2  -4  -3  17  1466.89  1390.12    50.63 o
      4031    1  -4   3  17  1466.89  1390.12    50.63 o
      4032    2  -5  -3  17  1036.50   963.96    42.96 o
      4032    1  -3   3  17  1036.50   963.96    42.96 o
      4033    2  -6  -3  17   847.62   858.85    43.73 o
      4033    1  -2   3  17   847.62   858.85    43.73 o
      4034    2  -7  -3  17   374.19   363.64    32.60 o
      4034    1  -1   3  17   374.19   363.64    32.60 o
      4035    2  -8  -3  17   384.74   225.93    37.98 o
      4035    1   0   3  17   384.74   225.93    37.98 o
      4036    2  -9  -3  17   376.98   302.65    95.90 o
      4036    1   1   3  17   376.98   302.65    95.90 o
      4037    2 -10  -3  17   404.80   423.86    66.74 o
      4037    1   2   3  17   404.80   423.86    66.74 o
      4038    2 -11  -3  17   662.52   672.05    77.48 o
      4038    1   3   3  17   662.52   672.05    77.48 o
      4039    2 -12  -3  17   756.08   866.91    90.91 o
      4039    1   4   3  17   756.08   866.91    90.91 o
      4040    2 -13  -3  17   733.44   738.79    87.84 o
      4040    1   5   3  17   733.44   738.79    87.84 o
      4041    2 -14  -3  17   818.51   774.46    83.24 o
      4041    1   6   3  17   818.51   774.46    83.24 o
      4042    2 -15  -3  17   230.17   223.25    64.83 o
      4042    1   7   3  17   230.17   223.25    64.83 o
      4043    2 -16  -3  17   161.00   179.90    36.82 o
      4043    1   8   3  17   161.00   179.90    36.82 o
      4044    2 -17  -3  17   542.85   559.27    51.40 o
      4044    1   9   3  17   542.85   559.27    51.40 o
      4045    2 -18  -3  17   126.39   130.42    21.86 o
      4045    1  10   3  17   126.39   130.42    21.86 o
      4046    2 -19  -3  17   122.12   128.50    16.49 o
      4046    1  11   3  17   122.12   128.50    16.49 o
      4047    2 -20  -3  17   358.55   379.37    21.86 o
      4047    1  12   3  17   358.55   379.37    21.86 o
      4048    2  10  -4  17    76.02    51.40    30.69 <
      4048    1 -18   4  17    76.02    51.40    30.69 <
      4049    2   9  -4  17    52.45    31.07    28.39 <
      4049    1 -17   4  17    52.45    31.07    28.39 <
      4050    2   8  -4  17    21.47    12.27    26.47 <
      4050    1 -16   4  17    21.47    12.27    26.47 <
      4051    2   7  -4  17   227.55   248.95    39.13 o
      4051    1 -15   4  17   227.55   248.95    39.13 o
      4052    2   6  -4  17    49.55    96.66    29.15 o
      4052    1 -14   4  17    49.55    96.66    29.15 o
      4053    2   5  -4  17   338.75   384.74    42.19 o
      4053    1 -13   4  17   338.75   384.74    42.19 o
      4054    2   4  -4  17   219.39   178.75    36.06 o
      4054    1 -12   4  17   219.39   178.75    36.06 o
      4055    2   3  -4  17   369.45   348.68    60.61 o
      4055    1 -11   4  17   369.45   348.68    60.61 o
      4056    2   2  -4  17   604.05   666.68    48.72 o
      4056    1 -10   4  17   604.05   666.68    48.72 o
      4057    2   1  -4  17   383.25   380.52    40.66 o
      4057    1  -9   4  17   383.25   380.52    40.66 o
      4058    2   0  -4  17    48.19    69.05    37.59 <
      4058    1  -8   4  17    48.19    69.05    37.59 <
      4059    2  -1  -4  17   139.32   166.86    39.13 o
      4059    1  -7   4  17   139.32   166.86    39.13 o
      4060    2  -2  -4  17     9.71     0.38    31.45 <
      4060    1  -6   4  17     9.71     0.38    31.45 <
      4061    2  -3  -4  17    15.45    14.19    22.25 <
      4061    1  -5   4  17    15.45    14.19    22.25 <
      4062    2  -4  -4  17    32.52    31.84    24.93 <
      4062    1  -4   4  17    32.52    31.84    24.93 <
      4063    2  -5  -4  17   285.93   240.89    27.62 o
      4063    1  -3   4  17   285.93   240.89    27.62 o
      4064    2  -6  -4  17   260.37   233.22    29.15 o
      4064    1  -2   4  17   260.37   233.22    29.15 o
      4065    2  -7  -4  17    89.27    77.87    25.32 o
      4065    1  -1   4  17    89.27    77.87    25.32 o
      4066    2  -8  -4  17     1.87    14.96    21.48 <
      4066    1   0   4  17     1.87    14.96    21.48 <
      4067    2  -9  -4  17    97.01    26.08    84.39 <
      4067    1   1   4  17    97.01    26.08    84.39 <
      4068    2 -10  -4  17   226.19   293.06   102.80 <
      4068    1   2   4  17   226.19   293.06   102.80 <
      4069    2 -11  -4  17   150.22    86.31    98.58 <
      4069    1   3   4  17   150.22    86.31    98.58 <
      4070    2 -12  -4  17    16.68   108.17    99.73 <
      4070    1   4   4  17    16.68   108.17    99.73 <
      4071    2 -13  -4  17   123.97   156.89    90.14 <
      4071    1   5   4  17   123.97   156.89    90.14 <
      4072    2 -16  -4  17    99.06   245.11    70.96 o
      4072    1   8   4  17    99.06   245.11    70.96 o
      4073    2 -17  -4  17    29.39   166.86    67.51 <
      4073    1   9   4  17    29.39   166.86    67.51 <
      4074    2 -18  -4  17   145.02   275.42    71.73 o
      4074    1  10   4  17   145.02   275.42    71.73 o
      4075    2   7  -5  17    55.27    37.98    36.44 <
      4075    1 -15   5  17    55.27    37.98    36.44 <
      4076    2   6  -5  17   434.19   352.52    49.48 o
      4076    1 -14   5  17   434.19   352.52    49.48 o
      4077    2   5  -5  17   599.79   603.38    59.46 o
      4077    1 -13   5  17   599.79   603.38    59.46 o
      4078    2   4  -5  17   242.34   231.69    43.35 o
      4078    1 -12   5  17   242.34   231.69    43.35 o
      4079    2   3  -5  17   502.46   448.80    52.55 o
      4079    1 -11   5  17   502.46   448.80    52.55 o
      4080    2   2  -5  17   197.59   240.13    50.25 o
      4080    1 -10   5  17   197.59   240.13    50.25 o
      4081    2   1  -5  17     4.48    30.30    29.54 <
      4081    1  -9   5  17     4.48    30.30    29.54 <
      4082    2   0  -5  17     8.95    -1.15    29.54 <
      4082    1  -8   5  17     8.95    -1.15    29.54 <
      4083    2  -1  -5  17    19.77     5.37    23.78 <
      4083    1  -7   5  17    19.77     5.37    23.78 <
      4084    2  -2  -5  17   233.62   187.19    33.76 o
      4084    1  -6   5  17   233.62   187.19    33.76 o
      4085    2  -3  -5  17   403.23   373.23    40.28 o
      4085    1  -5   5  17   403.23   373.23    40.28 o
      4086    2  -4  -5  17   318.15   329.12    41.81 o
      4086    1  -4   5  17   318.15   329.12    41.81 o
      4087    2  -5  -5  17   462.97   451.10    62.14 o
      4087    1  -3   5  17   462.97   451.10    62.14 o
      4088    2  -6  -5  17   210.85   245.11    39.89 o
      4088    1  -2   5  17   210.85   245.11    39.89 o
      4089    2  -7  -5  17   123.13   110.09    32.22 o
      4089    1  -1   5  17   123.13   110.09    32.22 o
      4090    2  -8  -5  17    95.53   121.60    35.29 o
      4090    1   0   5  17    95.53   121.60    35.29 o
      4091    2  -9  -5  17    47.01    34.14    33.76 <
      4091    1   1   5  17    47.01    34.14    33.76 <
      4092    2 -10  -5  17   357.24   280.79    32.99 o
      4092    1   2   5  17   357.24   280.79    32.99 o
      4093    2 -11  -5  17   665.75   947.85   208.67 o
      4093    1   3   5  17   665.75   947.85   208.67 o
      4094    2   0  -6  17    21.33    13.81    37.59 <
      4094    1  -8   6  17    21.33    13.81    37.59 <
      4095    2  -1  -6  17   243.83   281.17    29.54 o
      4095    1  -7   6  17   243.83   281.17    29.54 o
      4096    2  -2  -6  17   162.84   146.53    23.02 o
      4096    1  -6   6  17   162.84   146.53    23.02 o
      4097    2  -3  -6  17    62.83    44.11    18.80 <
      4097    1  -5   6  17    62.83    44.11    18.80 <
      4098    2  -4  -6  17     1.65    -4.22    16.49 <
      4098    1  -4   6  17     1.65    -4.22    16.49 <
      4099    2  -5  -6  17    20.72    28.39    18.80 <
      4099    1  -3   6  17    20.72    28.39    18.80 <
      4100    2  -6  -6  17    18.62     6.90    38.36 <
      4100    1  -2   6  17    18.62     6.90    38.36 <
      4101    2  -7  -6  17    26.17   -54.09    38.36 <
      4101    1  -1   6  17    26.17   -54.09    38.36 <
      4102    2  -8  -6  17    23.08    13.43    33.76 <
      4102    1   0   6  17    23.08    13.43    33.76 <
      4103    2  14   0  18    24.57  -106.25    49.10 <
      4103    1 -22   0  18    24.57  -106.25    49.10 <
      4104    2  13   0  18    75.23     4.22    51.02 <
      4104    1 -21   0  18    75.23     4.22    51.02 <
      4105    2  12   0  18   384.80   311.09    69.43 o
      4105    1 -20   0  18   384.80   311.09    69.43 o
      4106    2  10   0  18   217.33   248.95    52.17 o
      4106    1 -18   0  18   217.33   248.95    52.17 o
      4107    2   9   0  18   474.77   472.20    62.52 o
      4107    1 -17   0  18   474.77   472.20    62.52 o
      4108    2   8   0  18    13.69    -8.44    29.54 <
      4108    1 -16   0  18    13.69    -8.44    29.54 <
      4109    2   7   0  18     3.01    11.12    29.92 <
      4109    1 -15   0  18     3.01    11.12    29.92 <
      4110    2   6   0  18     7.26    -5.37    21.48 <
      4110    1 -14   0  18     7.26    -5.37    21.48 <
      4111    2   5   0  18    25.51    13.81    21.86 <
      4111    1 -13   0  18    25.51    13.81    21.86 <
      4112    2   4   0  18   532.66   573.46    46.80 o
      4112    1 -12   0  18   532.66   573.46    46.80 o
      4113    2   3   0  18   141.47   160.72    31.07 o
      4113    1 -11   0  18   141.47   160.72    31.07 o
      4114    2   2   0  18  1036.31   961.66    80.55 o
      4114    1 -10   0  18  1036.31   961.66    80.55 o
      4115    2   1   0  18     9.53    28.77    14.19 <
      4115    1  -9   0  18     9.53    28.77    14.19 <
      4116    2   0   0  18  1455.05  1414.67    42.19 o
      4116    1  -8   0  18  1455.05  1414.67    42.19 o
      4117    2  -1   0  18   537.29   594.18    31.07 o
      4117    1  -7   0  18   537.29   594.18    31.07 o
      4118    2  -2   0  18  2188.77  2095.16    51.40 o
      4118    1  -6   0  18  2188.77  2095.16    51.40 o
      4119    2  -3   0  18  1751.87  1632.17    44.88 o
      4119    1  -5   0  18  1751.87  1632.17    44.88 o
      4120    2  -4   0  18   329.50   319.53    19.56 o
      4120    1  -4   0  18   329.50   319.53    19.56 o
      4121    2  -5   0  18   565.50   635.22    27.23 o
      4121    1  -3   0  18   565.50   635.22    27.23 o
      4122    2  -6   0  18  1703.48  1442.29    36.06 o
      4122    1  -2   0  18  1703.48  1442.29    36.06 o
      4123    2  -7   0  18   396.41   410.05    18.80 o
      4123    1  -1   0  18   396.41   410.05    18.80 o
      4124    2  -8   0  18   730.11   653.25    34.14 o
      4124    1   0   0  18   730.11   653.25    34.14 o
      4125    2  -9   0  18    31.87    35.67    18.80 <
      4125    1   1   0  18    31.87    35.67    18.80 <
      4126    2 -10   0  18   806.90   721.15    36.82 o
      4126    1   2   0  18   806.90   721.15    36.82 o
      4127    2 -11   0  18  1189.29  1016.12    44.50 o
      4127    1   3   0  18  1189.29  1016.12    44.50 o
      4128    2 -12   0  18  1426.06  1332.58    41.81 o
      4128    1   4   0  18  1426.06  1332.58    41.81 o
      4129    2 -13   0  18   431.92   449.18    27.62 o
      4129    1   5   0  18   431.92   449.18    27.62 o
      4130    2 -14   0  18    88.01    89.38    18.41 o
      4130    1   6   0  18    88.01    89.38    18.41 o
      4131    2 -15   0  18    35.87    32.99    11.51 <
      4131    1   7   0  18    35.87    32.99    11.51 <
      4132    2 -16   0  18   124.55   146.91    17.26 o
      4132    1   8   0  18   124.55   146.91    17.26 o
      4133    2 -17   0  18   245.97   250.10    21.48 o
      4133    1   9   0  18   245.97   250.10    21.48 o
      4134    2 -18   0  18   111.53    68.28    16.11 o
      4134    1  10   0  18   111.53    68.28    16.11 o
      4135    2 -19   0  18   740.21   698.90    36.44 o
      4135    1  11   0  18   740.21   698.90    36.44 o
      4136    2 -20   0  18   642.15   568.86    34.91 o
      4136    1  12   0  18   642.15   568.86    34.91 o
      4137    2 -21   0  18   254.99   256.24    28.39 o
      4137    1  13   0  18   254.99   256.24    28.39 o
      4138    2 -22   0  18     2.00     6.52    15.73 <
      4138    1  14   0  18     2.00     6.52    15.73 <
      4139    2  14  -1  18     0.52   -34.52    39.89 <
      4139    1 -22   1  18     0.52   -34.52    39.89 <
      4140    2  13  -1  18   342.68   330.27    46.03 o
      4140    1 -21   1  18   342.68   330.27    46.03 o
      4141    2  12  -1  18     4.19    -9.59    27.23 <
      4141    1 -20   1  18     4.19    -9.59    27.23 <
      4142    2  11  -1  18    30.70    19.56    23.78 <
      4142    1 -19   1  18    30.70    19.56    23.78 <
      4143    2  10  -1  18     3.06     1.15    21.86 <
      4143    1 -18   1  18     3.06     1.15    21.86 <
      4144    2   9  -1  18    52.09    32.99    22.63 <
      4144    1 -17   1  18    52.09    32.99    22.63 <
      4145    2   8  -1  18    25.93    51.02    21.86 <
      4145    1 -16   1  18    25.93    51.02    21.86 <
      4146    2   7  -1  18   150.71   157.27    27.62 o
      4146    1 -15   1  18   150.71   157.27    27.62 o
      4147    2   6  -1  18    24.50     0.77    18.80 <
      4147    1 -14   1  18    24.50     0.77    18.80 <
      4148    2   5  -1  18   305.43   283.47    31.07 o
      4148    1 -13   1  18   305.43   283.47    31.07 o
      4149    2   4  -1  18    58.49    64.44    21.86 <
      4149    1 -12   1  18    58.49    64.44    21.86 <
      4150    2   3  -1  18   132.18   144.23    26.08 o
      4150    1 -11   1  18   132.18   144.23    26.08 o
      4151    2   2  -1  18  1197.04  1095.91    32.99 o
      4151    1 -10   1  18  1197.04  1095.91    32.99 o
      4152    2   1  -1  18   176.55   169.55    21.10 o
      4152    1  -9   1  18   176.55   169.55    21.10 o
      4153    2   0  -1  18   157.83   148.07    18.80 o
      4153    1  -8   1  18   157.83   148.07    18.80 o
      4154    2  -1  -1  18    14.94    -8.06    13.81 <
      4154    1  -7   1  18    14.94    -8.06    13.81 <
      4155    2  -2  -1  18    14.89    19.95     9.97 <
      4155    1  -6   1  18    14.89    19.95     9.97 <
      4156    2  -3  -1  18    78.41    91.29    11.89 o
      4156    1  -5   1  18    78.41    91.29    11.89 o
      4157    2  -4  -1  18   979.65   835.84    25.32 o
      4157    1  -4   1  18   979.65   835.84    25.32 o
      4158    2  -5  -1  18    16.38    -4.99     9.97 <
      4158    1  -3   1  18    16.38    -4.99     9.97 <
      4159    2  -6  -1  18     2.20    11.51    11.12 <
      4159    1  -2   1  18     2.20    11.51    11.12 <
      4160    2  -7  -1  18    52.51    66.74    13.43 o
      4160    1  -1   1  18    52.51    66.74    13.43 o
      4161    2  -8  -1  18   449.18   424.63    20.33 o
      4161    1   0   1  18   449.18   424.63    20.33 o
      4162    2  -9  -1  18    62.47    73.65    13.43 o
      4162    1   1   1  18    62.47    73.65    13.43 o
      4163    2 -10  -1  18   243.74   214.04    17.26 o
      4163    1   2   1  18   243.74   214.04    17.26 o
      4164    2 -11  -1  18   125.31   123.90    14.58 o
      4164    1   3   1  18   125.31   123.90    14.58 o
      4165    2 -12  -1  18   101.43    84.01    14.19 o
      4165    1   4   1  18   101.43    84.01    14.19 o
      4166    2 -13  -1  18    18.06    -1.53    11.12 <
      4166    1   5   1  18    18.06    -1.53    11.12 <
      4167    2 -14  -1  18   109.53   119.68    19.18 o
      4167    1   6   1  18   109.53   119.68    19.18 o
      4168    2 -15  -1  18   237.06   229.00    12.27 o
      4168    1   7   1  18   237.06   229.00    12.27 o
      4169    2 -16  -1  18    22.35    25.70     8.06 o
      4169    1   8   1  18    22.35    25.70     8.06 o
      4170    2 -17  -1  18    17.83    17.26     8.06 <
      4170    1   9   1  18    17.83    17.26     8.06 <
      4171    2 -18  -1  18    43.98    45.26     8.82 o
      4171    1  10   1  18    43.98    45.26     8.82 o
      4172    2 -19  -1  18     1.19     5.37    14.96 <
      4172    1  11   1  18     1.19     5.37    14.96 <
      4173    2 -20  -1  18    16.83    29.15    16.49 <
      4173    1  12   1  18    16.83    29.15    16.49 <
      4174    2 -21  -1  18   143.13   163.02    23.02 o
      4174    1  13   1  18   143.13   163.02    23.02 o
      4175    2  13  -2  18   310.71   287.69    51.78 o
      4175    1 -21   2  18   310.71   287.69    51.78 o
      4176    2  12  -2  18   295.53   265.83    50.63 o
      4176    1 -20   2  18   295.53   265.83    50.63 o
      4177    2  11  -2  18    15.37   -34.52    19.56 <
      4177    1 -19   2  18    15.37   -34.52    19.56 <
      4178    2  10  -2  18   121.75   125.05    28.00 o
      4178    1 -18   2  18   121.75   125.05    28.00 o
      4179    2   9  -2  18     6.99    11.12    28.77 <
      4179    1 -17   2  18     6.99    11.12    28.77 <
      4180    2   8  -2  18     6.10    18.41    31.45 <
      4180    1 -16   2  18     6.10    18.41    31.45 <
      4181    2   7  -2  18   328.80   326.82    46.03 o
      4181    1 -15   2  18   328.80   326.82    46.03 o
      4182    2   6  -2  18   167.51   143.08    37.59 o
      4182    1 -14   2  18   167.51   143.08    37.59 o
      4183    2   5  -2  18   152.79   147.30    35.29 o
      4183    1 -13   2  18   152.79   147.30    35.29 o
      4184    2   4  -2  18     2.27     3.84    19.18 <
      4184    1 -12   2  18     2.27     3.84    19.18 <
      4185    2   3  -2  18    77.92    68.28    16.49 o
      4185    1 -11   2  18    77.92    68.28    16.49 o
      4186    2   2  -2  18   426.00   423.48    25.32 o
      4186    1 -10   2  18   426.00   423.48    25.32 o
      4187    2   1  -2  18   583.54   583.82    29.54 o
      4187    1  -9   2  18   583.54   583.82    29.54 o
      4188    2   0  -2  18   101.66    90.91    17.65 o
      4188    1  -8   2  18   101.66    90.91    17.65 o
      4189    2  -1  -2  18    70.58    70.20    23.02 o
      4189    1  -7   2  18    70.58    70.20    23.02 o
      4190    2  -2  -2  18   239.82   226.70    21.10 o
      4190    1  -6   2  18   239.82   226.70    21.10 o
      4191    2  -3  -2  18    48.73    52.17    17.65 <
      4191    1  -5   2  18    48.73    52.17    17.65 <
      4192    2  -4  -2  18   157.34   161.87    20.33 o
      4192    1  -4   2  18   157.34   161.87    20.33 o
      4193    2  -5  -2  18     2.81     2.30    16.88 <
      4193    1  -3   2  18     2.81     2.30    16.88 <
      4194    2  -6  -2  18   353.17   359.42    28.39 o
      4194    1  -2   2  18   353.17   359.42    28.39 o
      4195    2  -7  -2  18   205.18   227.47    24.93 o
      4195    1  -1   2  18   205.18   227.47    24.93 o
      4196    2  -8  -2  18   551.50   487.54    24.93 o
      4196    1   0   2  18   551.50   487.54    24.93 o
      4197    2  -9  -2  18   513.18   479.48    26.08 o
      4197    1   1   2  18   513.18   479.48    26.08 o
      4198    2 -10  -2  18   486.22   498.66    31.07 o
      4198    1   2   2  18   486.22   498.66    31.07 o
      4199    2 -11  -2  18   344.05   320.30    34.14 o
      4199    1   3   2  18   344.05   320.30    34.14 o
      4200    2 -12  -2  18    16.32    -6.90    26.47 <
      4200    1   4   2  18    16.32    -6.90    26.47 <
      4201    2 -13  -2  18    30.25    14.96    26.47 <
      4201    1   5   2  18    30.25    14.96    26.47 <
      4202    2 -14  -2  18    13.31    -6.90    18.80 <
      4202    1   6   2  18    13.31    -6.90    18.80 <
      4203    2 -15  -2  18    33.51    43.35    10.74 o
      4203    1   7   2  18    33.51    43.35    10.74 o
      4204    2 -16  -2  18     1.75    20.33     9.59 <
      4204    1   8   2  18     1.75    20.33     9.59 <
      4205    2 -17  -2  18   101.80   120.83    11.51 o
      4205    1   9   2  18   101.80   120.83    11.51 o
      4206    2 -18  -2  18   282.43   279.25    14.19 o
      4206    1  10   2  18   282.43   279.25    14.19 o
      4207    2 -19  -2  18    53.51    54.47     9.21 o
      4207    1  11   2  18    53.51    54.47     9.21 o
      4208    2 -20  -2  18   189.01   171.85    22.63 o
      4208    1  12   2  18   189.01   171.85    22.63 o
      4209    2 -21  -2  18   109.76   130.42    41.81 o
      4209    1  13   2  18   109.76   130.42    41.81 o
      4210    2  11  -3  18   562.59   672.05    55.24 o
      4210    1 -19   3  18   562.59   672.05    55.24 o
      4211    2  10  -3  18   233.29   265.44    39.13 o
      4211    1 -18   3  18   233.29   265.44    39.13 o
      4212    2   9  -3  18   610.01   544.31    46.03 o
      4212    1 -17   3  18   610.01   544.31    46.03 o
      4213    2   8  -3  18  1221.54  1057.17    55.62 o
      4213    1 -16   3  18  1221.54  1057.17    55.62 o
      4214    2   7  -3  18    30.48    17.65    32.22 <
      4214    1 -15   3  18    30.48    17.65    32.22 <
      4215    2   6  -3  18     3.36    15.34    32.99 <
      4215    1 -14   3  18     3.36    15.34    32.99 <
      4216    2   5  -3  18    41.70    -9.97    28.39 <
      4216    1 -13   3  18    41.70    -9.97    28.39 <
      4217    2   4  -3  18    38.14    62.91    25.70 <
      4217    1 -12   3  18    38.14    62.91    25.70 <
      4218    2   3  -3  18     4.23   -49.87    21.10 <
      4218    1 -11   3  18     4.23   -49.87    21.10 <
      4219    2   2  -3  18     4.63   -14.96    18.03 <
      4219    1 -10   3  18     4.63   -14.96    18.03 <
      4220    2   1  -3  18  1367.31  1334.89    49.10 o
      4220    1  -9   3  18  1367.31  1334.89    49.10 o
      4221    2   0  -3  18  1003.18   932.89    46.80 o
      4221    1  -8   3  18  1003.18   932.89    46.80 o
      4222    2  -1  -3  18   526.44   517.08    40.28 o
      4222    1  -7   3  18   526.44   517.08    40.28 o
      4223    2  -2  -3  18  1238.87  1153.06    48.33 o
      4223    1  -6   3  18  1238.87  1153.06    48.33 o
      4224    2  -3  -3  18   154.91   184.89    27.23 o
      4224    1  -5   3  18   154.91   184.89    27.23 o
      4225    2  -4  -3  18   126.55   160.72    25.70 o
      4225    1  -4   3  18   126.55   160.72    25.70 o
      4226    2  -5  -3  18   236.92   228.24    28.77 o
      4226    1  -3   3  18   236.92   228.24    28.77 o
      4227    2  -6  -3  18   333.40   298.05    32.22 o
      4227    1  -2   3  18   333.40   298.05    32.22 o
      4228    2  -7  -3  18   591.40   568.09    38.74 o
      4228    1  -1   3  18   591.40   568.09    38.74 o
      4229    2  -8  -3  18   886.48   879.95    50.25 o
      4229    1   0   3  18   886.48   879.95    50.25 o
      4230    2  -9  -3  18   632.75   686.24   133.10 o
      4230    1   1   3  18   632.75   686.24   133.10 o
      4231    2 -10  -3  18    58.93    73.65    49.10 <
      4231    1   2   3  18    58.93    73.65    49.10 <
      4232    2 -11  -3  18    16.00    48.33    49.87 <
      4232    1   3   3  18    16.00    48.33    49.87 <
      4233    2 -12  -3  18   120.77    85.16    51.40 <
      4233    1   4   3  18   120.77    85.16    51.40 <
      4234    2 -13  -3  18    72.33    82.09    51.02 <
      4234    1   5   3  18    72.33    82.09    51.02 <
      4235    2 -14  -3  18     5.08    25.70    51.02 <
      4235    1   6   3  18     5.08    25.70    51.02 <
      4236    2 -15  -3  18    16.63    27.62    52.94 <
      4236    1   7   3  18    16.63    27.62    52.94 <
      4237    2 -16  -3  18   551.04   535.87    75.18 o
      4237    1   8   3  18   551.04   535.87    75.18 o
      4238    2 -17  -3  18   550.58   481.40    71.73 o
      4238    1   9   3  18   550.58   481.40    71.73 o
      4239    2 -18  -3  18   291.27   288.07    25.70 o
      4239    1  10   3  18   291.27   288.07    25.70 o
      4240    2 -19  -3  18   227.29   182.97    22.63 o
      4240    1  11   3  18   227.29   182.97    22.63 o
      4241    2   9  -4  18   265.77   217.11    40.28 o
      4241    1 -17   4  18   265.77   217.11    40.28 o
      4242    2   8  -4  18   260.95   233.60    40.28 o
      4242    1 -16   4  18   260.95   233.60    40.28 o
      4243    2   7  -4  18   335.96   294.21    40.28 o
      4243    1 -15   4  18   335.96   294.21    40.28 o
      4244    2   6  -4  18   480.99   501.73    49.10 o
      4244    1 -14   4  18   480.99   501.73    49.10 o
      4245    2   5  -4  18    28.56    25.32    30.30 <
      4245    1 -13   4  18    28.56    25.32    30.30 <
      4246    2   4  -4  18    15.77    31.07    41.81 <
      4246    1 -12   4  18    15.77    31.07    41.81 <
      4247    2   3  -4  18   225.88   269.66    54.09 o
      4247    1 -11   4  18   225.88   269.66    54.09 o
      4248    2   2  -4  18   281.91   293.06    39.51 o
      4248    1 -10   4  18   281.91   293.06    39.51 o
      4249    2   1  -4  18     6.04     6.90    27.23 <
      4249    1  -9   4  18     6.04     6.90    27.23 <
      4250    2   0  -4  18   160.85   253.55    47.56 o
      4250    1  -8   4  18   160.85   253.55    47.56 o
      4251    2  -1  -4  18     6.52    12.27    32.60 <
      4251    1  -7   4  18     6.52    12.27    32.60 <
      4252    2  -2  -4  18    44.48    76.33    37.21 <
      4252    1  -6   4  18    44.48    76.33    37.21 <
      4253    2  -3  -4  18     4.57    37.21    25.32 <
      4253    1  -5   4  18     4.57    37.21    25.32 <
      4254    2  -4  -4  18     2.72    14.19    25.70 <
      4254    1  -4   4  18     2.72    14.19    25.70 <
      4255    2  -5  -4  18    97.45   100.12    24.93 o
      4255    1  -3   4  18    97.45   100.12    24.93 o
      4256    2  -6  -4  18    27.16    43.73    26.47 <
      4256    1  -2   4  18    27.16    43.73    26.47 <
      4257    2  -7  -4  18    11.29     7.67    28.39 <
      4257    1  -1   4  18    11.29     7.67    28.39 <
      4258    2  -8  -4  18     6.27   -11.51    24.55 <
      4258    1   0   4  18     6.27   -11.51    24.55 <
      4259    2  -9  -4  18    31.75    49.48    93.60 <
      4259    1   1   4  18    31.75    49.48    93.60 <
      4260    2 -10  -4  18    76.54   250.87   112.01 <
      4260    1   2   4  18    76.54   250.87   112.01 <
      4261    2 -11  -4  18    10.11    34.52    92.06 <
      4261    1   3   4  18    10.11    34.52    92.06 <
      4262    2 -12  -4  18   131.13    69.05    92.83 <
      4262    1   4   4  18   131.13    69.05    92.83 <
      4263    2 -13  -4  18    75.24    35.67    99.73 <
      4263    1   5   4  18    75.24    35.67    99.73 <
      4264    2 -14  -4  18   498.24   584.97   101.65 o
      4264    1   6   4  18   498.24   584.97   101.65 o
      4265    2 -15  -4  18   471.76   670.90    97.81 o
      4265    1   7   4  18   471.76   670.90    97.81 o
      4266    2 -16  -4  18    74.38   284.24    73.27 o
[truncated: 94,964 more chars]
